# Supplementary material for: Comparative Detection of Selection Signatures in Indigenous and Crossbred Turkish Sheep Breeds
Source: Research Square preprint supplement (doi:10.21203/rs.3.rs-7364156/v1), 2025-09-09
Supplement: Supplementary file 1 [file 002981898891bc9c7654ce08.xlsx]

## Sheet: Sheet1
	Table S3. Signatures of selection detected by ROH in Hasmer
Region	Chr	Start	Stop	Size_Mb	No_of_genes	Peak_gene	Genes
10:12531:11273433	10	12531	11273433	11.2609	263		, SUCLA2, MED4, ITM2B, ATP7B, SLC25A15, U6, U8, 5S_rRNA, SNORA71, U2
10:14201576:30177658	10	14201576	30177658	15.9761	263		, SUCLA2, MED4, ITM2B, ATP7B, SLC25A15, U6, U8, 5S_rRNA, SNORA71, U2
10:37775025:39356591	10	37775025	39356591	1.58157	263		, SUCLA2, MED4, ITM2B, ATP7B, SLC25A15, U6, U8, 5S_rRNA, SNORA71, U2
10:47228374:51411639	10	47228374	51411639	4.18326	263		, SUCLA2, MED4, ITM2B, ATP7B, SLC25A15, U6, U8, 5S_rRNA, SNORA71, U2
10:59923313:61273031	10	59923313	61273031	1.34972	263		, SUCLA2, MED4, ITM2B, ATP7B, SLC25A15, U6, U8, 5S_rRNA, SNORA71, U2
10:78599532:79980490	10	78599532	79980490	1.38096	263		, SUCLA2, MED4, ITM2B, ATP7B, SLC25A15, U6, U8, 5S_rRNA, SNORA71, U2
10:84741018:86999386	10	84741018	86999386	2.25837	263		, SUCLA2, MED4, ITM2B, ATP7B, SLC25A15, U6, U8, 5S_rRNA, SNORA71, U2
11:16459993:17661238	11	16459993	17661238	1.20124	398		, STAT5A, CCR10, RPL23A, B4GALNT2, ATP5MC1, SLC6A4, ARL5C, THRA, NR1D1, IGFBP4, PRKAR1A, KRT25, KRT27, U6, oar-mir-10a, U2, SNORD42, SNORA70, oar-mir-152, U4, 5S_rRNA, Y_RNA, SNORA72
11:18006539:21710774	11	18006539	21710774	3.70424	398		, STAT5A, CCR10, RPL23A, B4GALNT2, ATP5MC1, SLC6A4, ARL5C, THRA, NR1D1, IGFBP4, PRKAR1A, KRT25, KRT27, U6, oar-mir-10a, U2, SNORD42, SNORA70, oar-mir-152, U4, 5S_rRNA, Y_RNA, SNORA72
11:29410377:31813943	11	29410377	31813943	2.40357	398		, STAT5A, CCR10, RPL23A, B4GALNT2, ATP5MC1, SLC6A4, ARL5C, THRA, NR1D1, IGFBP4, PRKAR1A, KRT25, KRT27, U6, oar-mir-10a, U2, SNORD42, SNORA70, oar-mir-152, U4, 5S_rRNA, Y_RNA, SNORA72
11:36517542:37997787	11	36517542	37997787	1.48025	398		, STAT5A, CCR10, RPL23A, B4GALNT2, ATP5MC1, SLC6A4, ARL5C, THRA, NR1D1, IGFBP4, PRKAR1A, KRT25, KRT27, U6, oar-mir-10a, U2, SNORD42, SNORA70, oar-mir-152, U4, 5S_rRNA, Y_RNA, SNORA72
11:38884167:40642288	11	38884167	40642288	1.75812	398		, STAT5A, CCR10, RPL23A, B4GALNT2, ATP5MC1, SLC6A4, ARL5C, THRA, NR1D1, IGFBP4, PRKAR1A, KRT25, KRT27, U6, oar-mir-10a, U2, SNORD42, SNORA70, oar-mir-152, U4, 5S_rRNA, Y_RNA, SNORA72
11:41708246:43769313	11	41708246	43769313	2.06107	398		, STAT5A, CCR10, RPL23A, B4GALNT2, ATP5MC1, SLC6A4, ARL5C, THRA, NR1D1, IGFBP4, PRKAR1A, KRT25, KRT27, U6, oar-mir-10a, U2, SNORD42, SNORA70, oar-mir-152, U4, 5S_rRNA, Y_RNA, SNORA72
11:58548132:60239789	11	58548132	60239789	1.69166	398		, STAT5A, CCR10, RPL23A, B4GALNT2, ATP5MC1, SLC6A4, ARL5C, THRA, NR1D1, IGFBP4, PRKAR1A, KRT25, KRT27, U6, oar-mir-10a, U2, SNORD42, SNORA70, oar-mir-152, U4, 5S_rRNA, Y_RNA, SNORA72
11:60712760:62400735	11	60712760	62400735	1.68798	398		, STAT5A, CCR10, RPL23A, B4GALNT2, ATP5MC1, SLC6A4, ARL5C, THRA, NR1D1, IGFBP4, PRKAR1A, KRT25, KRT27, U6, oar-mir-10a, U2, SNORD42, SNORA70, oar-mir-152, U4, 5S_rRNA, Y_RNA, SNORA72
12:23729552:25427253	12	23729552	25427253	1.6977	391		, LAMC2, TLR5, ISG15, ATP1B1, SELP, SELE, SERPINC1, CAPN2, DEGS1, NR5A2, 5S_rRNA, oar-mir-29b-1, U6, oar-mir-200a, SNORD81, SNORD79, oar-mir-200b, SNORD24, SNORA70
12:25678683:28149407	12	25678683	28149407	2.47072	391		, LAMC2, TLR5, ISG15, ATP1B1, SELP, SELE, SERPINC1, CAPN2, DEGS1, NR5A2, 5S_rRNA, oar-mir-29b-1, U6, oar-mir-200a, SNORD81, SNORD79, oar-mir-200b, SNORD24, SNORA70
12:35034764:36100008	12	35034764	36100008	1.06524	391		, LAMC2, TLR5, ISG15, ATP1B1, SELP, SELE, SERPINC1, CAPN2, DEGS1, NR5A2, 5S_rRNA, oar-mir-29b-1, U6, oar-mir-200a, SNORD81, SNORD79, oar-mir-200b, SNORD24, SNORA70
12:43199598:45266583	12	43199598	45266583	2.06698	391		, LAMC2, TLR5, ISG15, ATP1B1, SELP, SELE, SERPINC1, CAPN2, DEGS1, NR5A2, 5S_rRNA, oar-mir-29b-1, U6, oar-mir-200a, SNORD81, SNORD79, oar-mir-200b, SNORD24, SNORA70
12:48244293:50757182	12	48244293	50757182	2.51289	391		, LAMC2, TLR5, ISG15, ATP1B1, SELP, SELE, SERPINC1, CAPN2, DEGS1, NR5A2, 5S_rRNA, oar-mir-29b-1, U6, oar-mir-200a, SNORD81, SNORD79, oar-mir-200b, SNORD24, SNORA70
12:51900219:63436542	12	51900219	63436542	11.5363	391		, LAMC2, TLR5, ISG15, ATP1B1, SELP, SELE, SERPINC1, CAPN2, DEGS1, NR5A2, 5S_rRNA, oar-mir-29b-1, U6, oar-mir-200a, SNORD81, SNORD79, oar-mir-200b, SNORD24, SNORA70
12:67971257:70467912	12	67971257	70467912	2.49666	391		, LAMC2, TLR5, ISG15, ATP1B1, SELP, SELE, SERPINC1, CAPN2, DEGS1, NR5A2, 5S_rRNA, oar-mir-29b-1, U6, oar-mir-200a, SNORD81, SNORD79, oar-mir-200b, SNORD24, SNORA70
12:72403274:74939116	12	72403274	74939116	2.53584	391		, LAMC2, TLR5, ISG15, ATP1B1, SELP, SELE, SERPINC1, CAPN2, DEGS1, NR5A2, 5S_rRNA, oar-mir-29b-1, U6, oar-mir-200a, SNORD81, SNORD79, oar-mir-200b, SNORD24, SNORA70
12:76424491:78430672	12	76424491	78430672	2.00618	391		, LAMC2, TLR5, ISG15, ATP1B1, SELP, SELE, SERPINC1, CAPN2, DEGS1, NR5A2, 5S_rRNA, oar-mir-29b-1, U6, oar-mir-200a, SNORD81, SNORD79, oar-mir-200b, SNORD24, SNORA70
13:15056783:16487810	13	15056783	16487810	1.43103	267		, PRNP, PRND, EIF6, IL2RA, CPNE1, ITGB1, ADIG, U6, SNORD31, 5S_rRNA, SNORA71, SNORA70, PRNT
13:17561510:21449416	13	17561510	21449416	3.88791	267		, PRNP, PRND, EIF6, IL2RA, CPNE1, ITGB1, ADIG, U6, SNORD31, 5S_rRNA, SNORA71, SNORA70, PRNT
13:21457:5048144	13	21457	5048144	5.02669	267		, PRNP, PRND, EIF6, IL2RA, CPNE1, ITGB1, ADIG, U6, SNORD31, 5S_rRNA, SNORA71, SNORA70, PRNT
13:36590985:37697946	13	36590985	37697946	1.10696	267		, PRNP, PRND, EIF6, IL2RA, CPNE1, ITGB1, ADIG, U6, SNORD31, 5S_rRNA, SNORA71, SNORA70, PRNT
13:45741876:46745763	13	45741876	46745763	1.00389	267		, PRNP, PRND, EIF6, IL2RA, CPNE1, ITGB1, ADIG, U6, SNORD31, 5S_rRNA, SNORA71, SNORA70, PRNT
13:5313353:11042073	13	5313353	11042073	5.72872	267		, PRNP, PRND, EIF6, IL2RA, CPNE1, ITGB1, ADIG, U6, SNORD31, 5S_rRNA, SNORA71, SNORA70, PRNT
13:55835685:56846590	13	55835685	56846590	1.0109	267		, PRNP, PRND, EIF6, IL2RA, CPNE1, ITGB1, ADIG, U6, SNORD31, 5S_rRNA, SNORA71, SNORA70, PRNT
13:61281020:62839711	13	61281020	62839711	1.55869	267		, PRNP, PRND, EIF6, IL2RA, CPNE1, ITGB1, ADIG, U6, SNORD31, 5S_rRNA, SNORA71, SNORA70, PRNT
13:63741338:64991762	13	63741338	64991762	1.25042	267		, PRNP, PRND, EIF6, IL2RA, CPNE1, ITGB1, ADIG, U6, SNORD31, 5S_rRNA, SNORA71, SNORA70, PRNT
13:66110554:67214875	13	66110554	67214875	1.10432	267		, PRNP, PRND, EIF6, IL2RA, CPNE1, ITGB1, ADIG, U6, SNORD31, 5S_rRNA, SNORA71, SNORA70, PRNT
13:78262615:79783093	13	78262615	79783093	1.52048	267		, PRNP, PRND, EIF6, IL2RA, CPNE1, ITGB1, ADIG, U6, SNORD31, 5S_rRNA, SNORA71, SNORA70, PRNT
13:79863832:81451897	13	79863832	81451897	1.58807	267		, PRNP, PRND, EIF6, IL2RA, CPNE1, ITGB1, ADIG, U6, SNORD31, 5S_rRNA, SNORA71, SNORA70, PRNT
14:129818:6499076	14	129818	6499076	6.36926	842		, NCR1, HAMP, SNRPA, BCKDHA, TGFB1, LIPE, RABAC1, BSP5, BSP1, PLAUR, ZDHHC7, KLK1, 7SK, U6, 5S_rRNA, U1, SNORA70, Vault
14:35458694:45394482	14	35458694	45394482	9.93579	842		, NCR1, HAMP, SNRPA, BCKDHA, TGFB1, LIPE, RABAC1, BSP5, BSP1, PLAUR, ZDHHC7, KLK1, 7SK, U6, 5S_rRNA, U1, SNORA70, Vault
14:49267489:50415581	14	49267489	50415581	1.14809	842		, NCR1, HAMP, SNRPA, BCKDHA, TGFB1, LIPE, RABAC1, BSP5, BSP1, PLAUR, ZDHHC7, KLK1, 7SK, U6, 5S_rRNA, U1, SNORA70, Vault
14:50726282:53766713	14	50726282	53766713	3.04043	842		, NCR1, HAMP, SNRPA, BCKDHA, TGFB1, LIPE, RABAC1, BSP5, BSP1, PLAUR, ZDHHC7, KLK1, 7SK, U6, 5S_rRNA, U1, SNORA70, Vault
14:55413857:69215155	14	55413857	69215155	13.8013	842		, NCR1, HAMP, SNRPA, BCKDHA, TGFB1, LIPE, RABAC1, BSP5, BSP1, PLAUR, ZDHHC7, KLK1, 7SK, U6, 5S_rRNA, U1, SNORA70, Vault
14:8427476:17909785	14	8427476	17909785	9.48231	842		, NCR1, HAMP, SNRPA, BCKDHA, TGFB1, LIPE, RABAC1, BSP5, BSP1, PLAUR, ZDHHC7, KLK1, 7SK, U6, 5S_rRNA, U1, SNORA70, Vault
15:32760787:37266706	15	32760787	37266706	4.50592	530		, UCP2, ILK, ARFIP2, SMPD1, SNORD14, U6, SNORD15, 5S_rRNA, 7SK, SNORA70, U1, U4, U5, MYOD1
15:42111352:58881927	15	42111352	58881927	16.7706	530		, UCP2, ILK, ARFIP2, SMPD1, SNORD14, U6, SNORD15, 5S_rRNA, 7SK, SNORA70, U1, U4, U5, MYOD1
15:51139:2799595	15	51139	2799595	2.74846	530		, UCP2, ILK, ARFIP2, SMPD1, SNORD14, U6, SNORD15, 5S_rRNA, 7SK, SNORA70, U1, U4, U5, MYOD1
15:72233588:73492003	15	72233588	73492003	1.25842	530		, UCP2, ILK, ARFIP2, SMPD1, SNORD14, U6, SNORD15, 5S_rRNA, 7SK, SNORA70, U1, U4, U5, MYOD1
15:77516269:80829855	15	77516269	80829855	3.31359	530		, UCP2, ILK, ARFIP2, SMPD1, SNORD14, U6, SNORD15, 5S_rRNA, 7SK, SNORA70, U1, U4, U5, MYOD1
16:1677314:35697348	16	1677314	35697348	34.02	324		, AK6, FST, FGF10, CCL28, GHR, 5S_rRNA, U6, U1, SNORD28, U2, Metazoa_SRP, U4
16:36833073:38786041	16	36833073	38786041	1.95297	324		, AK6, FST, FGF10, CCL28, GHR, 5S_rRNA, U6, U1, SNORD28, U2, Metazoa_SRP, U4
16:66863478:68146852	16	66863478	68146852	1.28337	324		, AK6, FST, FGF10, CCL28, GHR, 5S_rRNA, U6, U1, SNORD28, U2, Metazoa_SRP, U4
16:69337028:72107292	16	69337028	72107292	2.77026	324		, AK6, FST, FGF10, CCL28, GHR, 5S_rRNA, U6, U1, SNORD28, U2, Metazoa_SRP, U4
17:18132876:23905156	17	18132876	23905156	5.77228	117		, TMEM154, EDNRA, SLC7A11, Metazoa_SRP, U6, 7SK, 5S_rRNA, SNORD73, U1
17:27376112:28535917	17	27376112	28535917	1.1598	117		, TMEM154, EDNRA, SLC7A11, Metazoa_SRP, U6, 7SK, 5S_rRNA, SNORD73, U1
17:30793193:32427516	17	30793193	32427516	1.63432	117		, TMEM154, EDNRA, SLC7A11, Metazoa_SRP, U6, 7SK, 5S_rRNA, SNORD73, U1
17:4172285:8945256	17	4172285	8945256	4.77297	117		, TMEM154, EDNRA, SLC7A11, Metazoa_SRP, U6, 7SK, 5S_rRNA, SNORD73, U1
17:62850017:63947786	17	62850017	63947786	1.09777	117		, TMEM154, EDNRA, SLC7A11, Metazoa_SRP, U6, 7SK, 5S_rRNA, SNORD73, U1
17:9872934:13027825	17	9872934	13027825	3.15489	117		, TMEM154, EDNRA, SLC7A11, Metazoa_SRP, U6, 7SK, 5S_rRNA, SNORD73, U1
18:13438020:22831399	18	13438020	22831399	9.39338	364		, PDIA3, RHCG, PLIN1, CIB1, FURIN, SERPINA1, SERPINA14, U6, U5, 5S_rRNA, U1
18:34160804:39083150	18	34160804	39083150	4.92235	364		, PDIA3, RHCG, PLIN1, CIB1, FURIN, SERPINA1, SERPINA14, U6, U5, 5S_rRNA, U1
18:39273347:41180203	18	39273347	41180203	1.90686	364		, PDIA3, RHCG, PLIN1, CIB1, FURIN, SERPINA1, SERPINA14, U6, U5, 5S_rRNA, U1
18:4450560:9928000	18	4450560	9928000	5.47744	364		, PDIA3, RHCG, PLIN1, CIB1, FURIN, SERPINA1, SERPINA14, U6, U5, 5S_rRNA, U1
18:54263457:64095685	18	54263457	64095685	9.83223	364		, PDIA3, RHCG, PLIN1, CIB1, FURIN, SERPINA1, SERPINA14, U6, U5, 5S_rRNA, U1
18:65025484:68055837	18	65025484	68055837	3.03035	364		, PDIA3, RHCG, PLIN1, CIB1, FURIN, SERPINA1, SERPINA14, U6, U5, 5S_rRNA, U1
19:18288113:28006679	19	18288113	28006679	9.71857	190		, MYD88, CATHL3, BAC5, SC5, ELP6, ARL8B, BHLHE40, LTF, CCR9, CCR3, PPARG, U6, 5S_rRNA, 7SK, 5_8S_rRNA, U2
19:2120396:3464954	19	2120396	3464954	1.34456	190		, MYD88, CATHL3, BAC5, SC5, ELP6, ARL8B, BHLHE40, LTF, CCR9, CCR3, PPARG, U6, 5S_rRNA, 7SK, 5_8S_rRNA, U2
19:51596493:53859063	19	51596493	53859063	2.26257	190		, MYD88, CATHL3, BAC5, SC5, ELP6, ARL8B, BHLHE40, LTF, CCR9, CCR3, PPARG, U6, 5S_rRNA, 7SK, 5_8S_rRNA, U2
19:54197433:57991974	19	54197433	57991974	3.79454	190		, MYD88, CATHL3, BAC5, SC5, ELP6, ARL8B, BHLHE40, LTF, CCR9, CCR3, PPARG, U6, 5S_rRNA, 7SK, 5_8S_rRNA, U2
19:8631321:11468417	19	8631321	11468417	2.8371	190		, MYD88, CATHL3, BAC5, SC5, ELP6, ARL8B, BHLHE40, LTF, CCR9, CCR3, PPARG, U6, 5S_rRNA, 7SK, 5_8S_rRNA, U2
1:109041667:110224941	1	109041667	110224941	1.18327	996		, UROD, IL12A, PRKAA2, SLAMF9, SLCO2A1, CYP2J, SLAMF1, NUDT16, DIRAS3, POU1F1, MTERF4, SLC30A7, OVGP1, ADORA3, RNF168, GUCA2A, YBX1, SST, RTP4, ST6GAL1, ADIPOQ, AHSG, GHSR, U6, 5S_rRNA, 7SK, SNORA66, SNORA70, U5, U2, Metazoa_SRP, RNaseP_nuc, U4, SNORA62, U1, SNORA63, Telomerase-vert, U8, Vault, SNORD21, oar-mir-16b, oar-mir-30c, SNORA72
1:127135921:128221853	1	127135921	128221853	1.08593	996		, UROD, IL12A, PRKAA2, SLAMF9, SLCO2A1, CYP2J, SLAMF1, NUDT16, DIRAS3, POU1F1, MTERF4, SLC30A7, OVGP1, ADORA3, RNF168, GUCA2A, YBX1, SST, RTP4, ST6GAL1, ADIPOQ, AHSG, GHSR, U6, 5S_rRNA, 7SK, SNORA66, SNORA70, U5, U2, Metazoa_SRP, RNaseP_nuc, U4, SNORA62, U1, SNORA63, Telomerase-vert, U8, Vault, SNORD21, oar-mir-16b, oar-mir-30c, SNORA72
1:139094784:140449783	1	139094784	140449783	1.355	996		, UROD, IL12A, PRKAA2, SLAMF9, SLCO2A1, CYP2J, SLAMF1, NUDT16, DIRAS3, POU1F1, MTERF4, SLC30A7, OVGP1, ADORA3, RNF168, GUCA2A, YBX1, SST, RTP4, ST6GAL1, ADIPOQ, AHSG, GHSR, U6, 5S_rRNA, 7SK, SNORA66, SNORA70, U5, U2, Metazoa_SRP, RNaseP_nuc, U4, SNORA62, U1, SNORA63, Telomerase-vert, U8, Vault, SNORD21, oar-mir-16b, oar-mir-30c, SNORA72
1:140676518:142710810	1	140676518	142710810	2.03429	996		, UROD, IL12A, PRKAA2, SLAMF9, SLCO2A1, CYP2J, SLAMF1, NUDT16, DIRAS3, POU1F1, MTERF4, SLC30A7, OVGP1, ADORA3, RNF168, GUCA2A, YBX1, SST, RTP4, ST6GAL1, ADIPOQ, AHSG, GHSR, U6, 5S_rRNA, 7SK, SNORA66, SNORA70, U5, U2, Metazoa_SRP, RNaseP_nuc, U4, SNORA62, U1, SNORA63, Telomerase-vert, U8, Vault, SNORD21, oar-mir-16b, oar-mir-30c, SNORA72
1:14574836:38551279	1	14574836	38551279	23.9764	996		, UROD, IL12A, PRKAA2, SLAMF9, SLCO2A1, CYP2J, SLAMF1, NUDT16, DIRAS3, POU1F1, MTERF4, SLC30A7, OVGP1, ADORA3, RNF168, GUCA2A, YBX1, SST, RTP4, ST6GAL1, ADIPOQ, AHSG, GHSR, U6, 5S_rRNA, 7SK, SNORA66, SNORA70, U5, U2, Metazoa_SRP, RNaseP_nuc, U4, SNORA62, U1, SNORA63, Telomerase-vert, U8, Vault, SNORD21, oar-mir-16b, oar-mir-30c, SNORA72
1:148892740:150446863	1	148892740	150446863	1.55412	996		, UROD, IL12A, PRKAA2, SLAMF9, SLCO2A1, CYP2J, SLAMF1, NUDT16, DIRAS3, POU1F1, MTERF4, SLC30A7, OVGP1, ADORA3, RNF168, GUCA2A, YBX1, SST, RTP4, ST6GAL1, ADIPOQ, AHSG, GHSR, U6, 5S_rRNA, 7SK, SNORA66, SNORA70, U5, U2, Metazoa_SRP, RNaseP_nuc, U4, SNORA62, U1, SNORA63, Telomerase-vert, U8, Vault, SNORD21, oar-mir-16b, oar-mir-30c, SNORA72
1:152783718:154168518	1	152783718	154168518	1.3848	996		, UROD, IL12A, PRKAA2, SLAMF9, SLCO2A1, CYP2J, SLAMF1, NUDT16, DIRAS3, POU1F1, MTERF4, SLC30A7, OVGP1, ADORA3, RNF168, GUCA2A, YBX1, SST, RTP4, ST6GAL1, ADIPOQ, AHSG, GHSR, U6, 5S_rRNA, 7SK, SNORA66, SNORA70, U5, U2, Metazoa_SRP, RNaseP_nuc, U4, SNORA62, U1, SNORA63, Telomerase-vert, U8, Vault, SNORD21, oar-mir-16b, oar-mir-30c, SNORA72
1:154551314:156652168	1	154551314	156652168	2.10085	996		, UROD, IL12A, PRKAA2, SLAMF9, SLCO2A1, CYP2J, SLAMF1, NUDT16, DIRAS3, POU1F1, MTERF4, SLC30A7, OVGP1, ADORA3, RNF168, GUCA2A, YBX1, SST, RTP4, ST6GAL1, ADIPOQ, AHSG, GHSR, U6, 5S_rRNA, 7SK, SNORA66, SNORA70, U5, U2, Metazoa_SRP, RNaseP_nuc, U4, SNORA62, U1, SNORA63, Telomerase-vert, U8, Vault, SNORD21, oar-mir-16b, oar-mir-30c, SNORA72
1:170935774:172310048	1	170935774	172310048	1.37427	996		, UROD, IL12A, PRKAA2, SLAMF9, SLCO2A1, CYP2J, SLAMF1, NUDT16, DIRAS3, POU1F1, MTERF4, SLC30A7, OVGP1, ADORA3, RNF168, GUCA2A, YBX1, SST, RTP4, ST6GAL1, ADIPOQ, AHSG, GHSR, U6, 5S_rRNA, 7SK, SNORA66, SNORA70, U5, U2, Metazoa_SRP, RNaseP_nuc, U4, SNORA62, U1, SNORA63, Telomerase-vert, U8, Vault, SNORD21, oar-mir-16b, oar-mir-30c, SNORA72
1:187356862:189339503	1	187356862	189339503	1.98264	996		, UROD, IL12A, PRKAA2, SLAMF9, SLCO2A1, CYP2J, SLAMF1, NUDT16, DIRAS3, POU1F1, MTERF4, SLC30A7, OVGP1, ADORA3, RNF168, GUCA2A, YBX1, SST, RTP4, ST6GAL1, ADIPOQ, AHSG, GHSR, U6, 5S_rRNA, 7SK, SNORA66, SNORA70, U5, U2, Metazoa_SRP, RNaseP_nuc, U4, SNORA62, U1, SNORA63, Telomerase-vert, U8, Vault, SNORD21, oar-mir-16b, oar-mir-30c, SNORA72
1:196759044:198199041	1	196759044	198199041	1.44	996		, UROD, IL12A, PRKAA2, SLAMF9, SLCO2A1, CYP2J, SLAMF1, NUDT16, DIRAS3, POU1F1, MTERF4, SLC30A7, OVGP1, ADORA3, RNF168, GUCA2A, YBX1, SST, RTP4, ST6GAL1, ADIPOQ, AHSG, GHSR, U6, 5S_rRNA, 7SK, SNORA66, SNORA70, U5, U2, Metazoa_SRP, RNaseP_nuc, U4, SNORA62, U1, SNORA63, Telomerase-vert, U8, Vault, SNORD21, oar-mir-16b, oar-mir-30c, SNORA72
1:198274446:200255514	1	198274446	200255514	1.98107	996		, UROD, IL12A, PRKAA2, SLAMF9, SLCO2A1, CYP2J, SLAMF1, NUDT16, DIRAS3, POU1F1, MTERF4, SLC30A7, OVGP1, ADORA3, RNF168, GUCA2A, YBX1, SST, RTP4, ST6GAL1, ADIPOQ, AHSG, GHSR, U6, 5S_rRNA, 7SK, SNORA66, SNORA70, U5, U2, Metazoa_SRP, RNaseP_nuc, U4, SNORA62, U1, SNORA63, Telomerase-vert, U8, Vault, SNORD21, oar-mir-16b, oar-mir-30c, SNORA72
1:201539484:219345371	1	201539484	219345371	17.8059	996		, UROD, IL12A, PRKAA2, SLAMF9, SLCO2A1, CYP2J, SLAMF1, NUDT16, DIRAS3, POU1F1, MTERF4, SLC30A7, OVGP1, ADORA3, RNF168, GUCA2A, YBX1, SST, RTP4, ST6GAL1, ADIPOQ, AHSG, GHSR, U6, 5S_rRNA, 7SK, SNORA66, SNORA70, U5, U2, Metazoa_SRP, RNaseP_nuc, U4, SNORA62, U1, SNORA63, Telomerase-vert, U8, Vault, SNORD21, oar-mir-16b, oar-mir-30c, SNORA72
1:224818104:227831862	1	224818104	227831862	3.01376	996		, UROD, IL12A, PRKAA2, SLAMF9, SLCO2A1, CYP2J, SLAMF1, NUDT16, DIRAS3, POU1F1, MTERF4, SLC30A7, OVGP1, ADORA3, RNF168, GUCA2A, YBX1, SST, RTP4, ST6GAL1, ADIPOQ, AHSG, GHSR, U6, 5S_rRNA, 7SK, SNORA66, SNORA70, U5, U2, Metazoa_SRP, RNaseP_nuc, U4, SNORA62, U1, SNORA63, Telomerase-vert, U8, Vault, SNORD21, oar-mir-16b, oar-mir-30c, SNORA72
1:229250777:230268872	1	229250777	230268872	1.01809	996		, UROD, IL12A, PRKAA2, SLAMF9, SLCO2A1, CYP2J, SLAMF1, NUDT16, DIRAS3, POU1F1, MTERF4, SLC30A7, OVGP1, ADORA3, RNF168, GUCA2A, YBX1, SST, RTP4, ST6GAL1, ADIPOQ, AHSG, GHSR, U6, 5S_rRNA, 7SK, SNORA66, SNORA70, U5, U2, Metazoa_SRP, RNaseP_nuc, U4, SNORA62, U1, SNORA63, Telomerase-vert, U8, Vault, SNORD21, oar-mir-16b, oar-mir-30c, SNORA72
1:233516016:234720664	1	233516016	234720664	1.20465	996		, UROD, IL12A, PRKAA2, SLAMF9, SLCO2A1, CYP2J, SLAMF1, NUDT16, DIRAS3, POU1F1, MTERF4, SLC30A7, OVGP1, ADORA3, RNF168, GUCA2A, YBX1, SST, RTP4, ST6GAL1, ADIPOQ, AHSG, GHSR, U6, 5S_rRNA, 7SK, SNORA66, SNORA70, U5, U2, Metazoa_SRP, RNaseP_nuc, U4, SNORA62, U1, SNORA63, Telomerase-vert, U8, Vault, SNORD21, oar-mir-16b, oar-mir-30c, SNORA72
1:242973698:244474339	1	242973698	244474339	1.50064	996		, UROD, IL12A, PRKAA2, SLAMF9, SLCO2A1, CYP2J, SLAMF1, NUDT16, DIRAS3, POU1F1, MTERF4, SLC30A7, OVGP1, ADORA3, RNF168, GUCA2A, YBX1, SST, RTP4, ST6GAL1, ADIPOQ, AHSG, GHSR, U6, 5S_rRNA, 7SK, SNORA66, SNORA70, U5, U2, Metazoa_SRP, RNaseP_nuc, U4, SNORA62, U1, SNORA63, Telomerase-vert, U8, Vault, SNORD21, oar-mir-16b, oar-mir-30c, SNORA72
1:245469441:248674675	1	245469441	248674675	3.20523	996		, UROD, IL12A, PRKAA2, SLAMF9, SLCO2A1, CYP2J, SLAMF1, NUDT16, DIRAS3, POU1F1, MTERF4, SLC30A7, OVGP1, ADORA3, RNF168, GUCA2A, YBX1, SST, RTP4, ST6GAL1, ADIPOQ, AHSG, GHSR, U6, 5S_rRNA, 7SK, SNORA66, SNORA70, U5, U2, Metazoa_SRP, RNaseP_nuc, U4, SNORA62, U1, SNORA63, Telomerase-vert, U8, Vault, SNORD21, oar-mir-16b, oar-mir-30c, SNORA72
1:251996763:254516211	1	251996763	254516211	2.51945	996		, UROD, IL12A, PRKAA2, SLAMF9, SLCO2A1, CYP2J, SLAMF1, NUDT16, DIRAS3, POU1F1, MTERF4, SLC30A7, OVGP1, ADORA3, RNF168, GUCA2A, YBX1, SST, RTP4, ST6GAL1, ADIPOQ, AHSG, GHSR, U6, 5S_rRNA, 7SK, SNORA66, SNORA70, U5, U2, Metazoa_SRP, RNaseP_nuc, U4, SNORA62, U1, SNORA63, Telomerase-vert, U8, Vault, SNORD21, oar-mir-16b, oar-mir-30c, SNORA72
1:255958836:257412697	1	255958836	257412697	1.45386	996		, UROD, IL12A, PRKAA2, SLAMF9, SLCO2A1, CYP2J, SLAMF1, NUDT16, DIRAS3, POU1F1, MTERF4, SLC30A7, OVGP1, ADORA3, RNF168, GUCA2A, YBX1, SST, RTP4, ST6GAL1, ADIPOQ, AHSG, GHSR, U6, 5S_rRNA, 7SK, SNORA66, SNORA70, U5, U2, Metazoa_SRP, RNaseP_nuc, U4, SNORA62, U1, SNORA63, Telomerase-vert, U8, Vault, SNORD21, oar-mir-16b, oar-mir-30c, SNORA72
1:264731401:265744406	1	264731401	265744406	1.013	996		, UROD, IL12A, PRKAA2, SLAMF9, SLCO2A1, CYP2J, SLAMF1, NUDT16, DIRAS3, POU1F1, MTERF4, SLC30A7, OVGP1, ADORA3, RNF168, GUCA2A, YBX1, SST, RTP4, ST6GAL1, ADIPOQ, AHSG, GHSR, U6, 5S_rRNA, 7SK, SNORA66, SNORA70, U5, U2, Metazoa_SRP, RNaseP_nuc, U4, SNORA62, U1, SNORA63, Telomerase-vert, U8, Vault, SNORD21, oar-mir-16b, oar-mir-30c, SNORA72
1:268504726:269733224	1	268504726	269733224	1.2285	996		, UROD, IL12A, PRKAA2, SLAMF9, SLCO2A1, CYP2J, SLAMF1, NUDT16, DIRAS3, POU1F1, MTERF4, SLC30A7, OVGP1, ADORA3, RNF168, GUCA2A, YBX1, SST, RTP4, ST6GAL1, ADIPOQ, AHSG, GHSR, U6, 5S_rRNA, 7SK, SNORA66, SNORA70, U5, U2, Metazoa_SRP, RNaseP_nuc, U4, SNORA62, U1, SNORA63, Telomerase-vert, U8, Vault, SNORD21, oar-mir-16b, oar-mir-30c, SNORA72
1:273341002:275029838	1	273341002	275029838	1.68884	996		, UROD, IL12A, PRKAA2, SLAMF9, SLCO2A1, CYP2J, SLAMF1, NUDT16, DIRAS3, POU1F1, MTERF4, SLC30A7, OVGP1, ADORA3, RNF168, GUCA2A, YBX1, SST, RTP4, ST6GAL1, ADIPOQ, AHSG, GHSR, U6, 5S_rRNA, 7SK, SNORA66, SNORA70, U5, U2, Metazoa_SRP, RNaseP_nuc, U4, SNORA62, U1, SNORA63, Telomerase-vert, U8, Vault, SNORD21, oar-mir-16b, oar-mir-30c, SNORA72
1:31152:1901205	1	31152	1901205	1.87005	996		, UROD, IL12A, PRKAA2, SLAMF9, SLCO2A1, CYP2J, SLAMF1, NUDT16, DIRAS3, POU1F1, MTERF4, SLC30A7, OVGP1, ADORA3, RNF168, GUCA2A, YBX1, SST, RTP4, ST6GAL1, ADIPOQ, AHSG, GHSR, U6, 5S_rRNA, 7SK, SNORA66, SNORA70, U5, U2, Metazoa_SRP, RNaseP_nuc, U4, SNORA62, U1, SNORA63, Telomerase-vert, U8, Vault, SNORD21, oar-mir-16b, oar-mir-30c, SNORA72
1:43137799:44391021	1	43137799	44391021	1.25322	996		, UROD, IL12A, PRKAA2, SLAMF9, SLCO2A1, CYP2J, SLAMF1, NUDT16, DIRAS3, POU1F1, MTERF4, SLC30A7, OVGP1, ADORA3, RNF168, GUCA2A, YBX1, SST, RTP4, ST6GAL1, ADIPOQ, AHSG, GHSR, U6, 5S_rRNA, 7SK, SNORA66, SNORA70, U5, U2, Metazoa_SRP, RNaseP_nuc, U4, SNORA62, U1, SNORA63, Telomerase-vert, U8, Vault, SNORD21, oar-mir-16b, oar-mir-30c, SNORA72
1:62820524:64669871	1	62820524	64669871	1.84935	996		, UROD, IL12A, PRKAA2, SLAMF9, SLCO2A1, CYP2J, SLAMF1, NUDT16, DIRAS3, POU1F1, MTERF4, SLC30A7, OVGP1, ADORA3, RNF168, GUCA2A, YBX1, SST, RTP4, ST6GAL1, ADIPOQ, AHSG, GHSR, U6, 5S_rRNA, 7SK, SNORA66, SNORA70, U5, U2, Metazoa_SRP, RNaseP_nuc, U4, SNORA62, U1, SNORA63, Telomerase-vert, U8, Vault, SNORD21, oar-mir-16b, oar-mir-30c, SNORA72
1:65725859:86505917	1	65725859	86505917	20.7801	996		, UROD, IL12A, PRKAA2, SLAMF9, SLCO2A1, CYP2J, SLAMF1, NUDT16, DIRAS3, POU1F1, MTERF4, SLC30A7, OVGP1, ADORA3, RNF168, GUCA2A, YBX1, SST, RTP4, ST6GAL1, ADIPOQ, AHSG, GHSR, U6, 5S_rRNA, 7SK, SNORA66, SNORA70, U5, U2, Metazoa_SRP, RNaseP_nuc, U4, SNORA62, U1, SNORA63, Telomerase-vert, U8, Vault, SNORD21, oar-mir-16b, oar-mir-30c, SNORA72
1:7708576:8942493	1	7708576	8942493	1.23392	996		, UROD, IL12A, PRKAA2, SLAMF9, SLCO2A1, CYP2J, SLAMF1, NUDT16, DIRAS3, POU1F1, MTERF4, SLC30A7, OVGP1, ADORA3, RNF168, GUCA2A, YBX1, SST, RTP4, ST6GAL1, ADIPOQ, AHSG, GHSR, U6, 5S_rRNA, 7SK, SNORA66, SNORA70, U5, U2, Metazoa_SRP, RNaseP_nuc, U4, SNORA62, U1, SNORA63, Telomerase-vert, U8, Vault, SNORD21, oar-mir-16b, oar-mir-30c, SNORA72
1:87845820:90182274	1	87845820	90182274	2.33645	996		, UROD, IL12A, PRKAA2, SLAMF9, SLCO2A1, CYP2J, SLAMF1, NUDT16, DIRAS3, POU1F1, MTERF4, SLC30A7, OVGP1, ADORA3, RNF168, GUCA2A, YBX1, SST, RTP4, ST6GAL1, ADIPOQ, AHSG, GHSR, U6, 5S_rRNA, 7SK, SNORA66, SNORA70, U5, U2, Metazoa_SRP, RNaseP_nuc, U4, SNORA62, U1, SNORA63, Telomerase-vert, U8, Vault, SNORD21, oar-mir-16b, oar-mir-30c, SNORA72
20:18950569:21801439	20	18950569	21801439	2.85087	69		, DTNBP1, U6, 5S_rRNA
20:27119:4367786	20	27119	4367786	4.34067	69		, DTNBP1, U6, 5S_rRNA
20:40412827:42731904	20	40412827	42731904	2.31908	69		, DTNBP1, U6, 5S_rRNA
20:45084858:46499564	20	45084858	46499564	1.41471	69		, DTNBP1, U6, 5S_rRNA
21:11399502:15508083	21	11399502	15508083	4.10858	144		, PAG9, PAG6, SDHAF2, FEN1, 5S_rRNA, SNORD30, U6, SNORD14, 7SK, SNORD15
21:17096281:20788203	21	17096281	20788203	3.69192	144		, PAG9, PAG6, SDHAF2, FEN1, 5S_rRNA, SNORD30, U6, SNORD14, 7SK, SNORD15
21:24667405:25794416	21	24667405	25794416	1.12701	144		, PAG9, PAG6, SDHAF2, FEN1, 5S_rRNA, SNORD30, U6, SNORD14, 7SK, SNORD15
21:32637268:34220094	21	32637268	34220094	1.58283	144		, PAG9, PAG6, SDHAF2, FEN1, 5S_rRNA, SNORD30, U6, SNORD14, 7SK, SNORD15
21:38544796:39706407	21	38544796	39706407	1.16161	144		, PAG9, PAG6, SDHAF2, FEN1, 5S_rRNA, SNORD30, U6, SNORD14, 7SK, SNORD15
21:46936641:48167168	21	46936641	48167168	1.23053	144		, PAG9, PAG6, SDHAF2, FEN1, 5S_rRNA, SNORD30, U6, SNORD14, 7SK, SNORD15
21:7712570:9991201	21	7712570	9991201	2.27863	144		, PAG9, PAG6, SDHAF2, FEN1, 5S_rRNA, SNORD30, U6, SNORD14, 7SK, SNORD15
22:26198060:27826405	22	26198060	27826405	1.62834	293		, ARL3, CYP17A1, SCD, LIPA, NDUFB8, ANKRD1, PITX3, U6, 5S_rRNA, SNORA70, 7SK, U3, SNORD22, oar-mir-107, SNORD96, U7
22:35767158:37101587	22	35767158	37101587	1.33443	293		, ARL3, CYP17A1, SCD, LIPA, NDUFB8, ANKRD1, PITX3, U6, 5S_rRNA, SNORA70, 7SK, U3, SNORD22, oar-mir-107, SNORD96, U7
22:41620:25489482	22	41620	25489482	25.4479	293		, ARL3, CYP17A1, SCD, LIPA, NDUFB8, ANKRD1, PITX3, U6, 5S_rRNA, SNORA70, 7SK, U3, SNORD22, oar-mir-107, SNORD96, U7
23:47378748:49508011	23	47378748	49508011	2.12926	132		, SMAD4, U6, 5S_rRNA, SNORD58, SNORD36, Metazoa_SRP, U2, 7SK
23:50798112:51959846	23	50798112	51959846	1.16173	132		, SMAD4, U6, 5S_rRNA, SNORD58, SNORD36, Metazoa_SRP, U2, 7SK
23:54018125:55806264	23	54018125	55806264	1.78814	132		, SMAD4, U6, 5S_rRNA, SNORD58, SNORD36, Metazoa_SRP, U2, 7SK
23:60663470:62062897	23	60663470	62062897	1.39943	132		, SMAD4, U6, 5S_rRNA, SNORD58, SNORD36, Metazoa_SRP, U2, 7SK
23:7583632:24105925	23	7583632	24105925	16.5223	132		, SMAD4, U6, 5S_rRNA, SNORD58, SNORD36, Metazoa_SRP, U2, 7SK
24:28840429:33535204	24	28840429	33535204	4.69477	267		, NUBP1, ATP6V0C, SSTR5, TPSB2, 5S_rRNA, SNORD14, U6, 5_8S_rRNA, U5, CLDN4
24:46191:3954376	24	46191	3954376	3.90819	267		, NUBP1, ATP6V0C, SSTR5, TPSB2, 5S_rRNA, SNORD14, U6, 5_8S_rRNA, U5, CLDN4
24:7603357:9595314	24	7603357	9595314	1.99196	267		, NUBP1, ATP6V0C, SSTR5, TPSB2, 5S_rRNA, SNORD14, U6, 5_8S_rRNA, U5, CLDN4
25:9710692:35836959	25	9710692	35836959	26.1263	194		, CDK1, DDX21, PLAU, SFTPA1, U6, 5S_rRNA
26:103286:4061467	26	103286	4061467	3.95818	139		, ADRB3, STAR, LSM1, IDO1, FNTA, THRB, 5S_rRNA, U6, Metazoa_SRP, 7SK, U1, SNORA70
26:25368277:26415972	26	25368277	26415972	1.0477	139		, ADRB3, STAR, LSM1, IDO1, FNTA, THRB, 5S_rRNA, U6, Metazoa_SRP, 7SK, U1, SNORA70
26:27766133:37837942	26	27766133	37837942	10.0718	139		, ADRB3, STAR, LSM1, IDO1, FNTA, THRB, 5S_rRNA, U6, Metazoa_SRP, 7SK, U1, SNORA70
26:38924895:40145501	26	38924895	40145501	1.22061	139		, ADRB3, STAR, LSM1, IDO1, FNTA, THRB, 5S_rRNA, U6, Metazoa_SRP, 7SK, U1, SNORA70
2:100273358:101303125	2	100273358	101303125	1.02977	579		, GSN, KLF4, ID3, ALDOB, C1QA, UBQLN1, NDUFB6, PPIL3, BMPR2, CD28, CTLA4, IDH1, IGFBP5, SLC11A1, PRKAG3, TUBA4A, INHA, ITM2C, COPS7B, U6, 5S_rRNA, SNORD39, oar-let-7d, SNORD82, SNORA75, 7SK, oar-mir-26b, SNORA70, oar-let-7a, Vault
2:110827578:111986760	2	110827578	111986760	1.15918	579		, GSN, KLF4, ID3, ALDOB, C1QA, UBQLN1, NDUFB6, PPIL3, BMPR2, CD28, CTLA4, IDH1, IGFBP5, SLC11A1, PRKAG3, TUBA4A, INHA, ITM2C, COPS7B, U6, 5S_rRNA, SNORD39, oar-let-7d, SNORD82, SNORA75, 7SK, oar-mir-26b, SNORA70, oar-let-7a, Vault
2:113111844:114905417	2	113111844	114905417	1.79357	579		, GSN, KLF4, ID3, ALDOB, C1QA, UBQLN1, NDUFB6, PPIL3, BMPR2, CD28, CTLA4, IDH1, IGFBP5, SLC11A1, PRKAG3, TUBA4A, INHA, ITM2C, COPS7B, U6, 5S_rRNA, SNORD39, oar-let-7d, SNORD82, SNORA75, 7SK, oar-mir-26b, SNORA70, oar-let-7a, Vault
2:1153266:2526246	2	1153266	2526246	1.37298	579		, GSN, KLF4, ID3, ALDOB, C1QA, UBQLN1, NDUFB6, PPIL3, BMPR2, CD28, CTLA4, IDH1, IGFBP5, SLC11A1, PRKAG3, TUBA4A, INHA, ITM2C, COPS7B, U6, 5S_rRNA, SNORD39, oar-let-7d, SNORD82, SNORA75, 7SK, oar-mir-26b, SNORA70, oar-let-7a, Vault
2:130314673:131584922	2	130314673	131584922	1.27025	579		, GSN, KLF4, ID3, ALDOB, C1QA, UBQLN1, NDUFB6, PPIL3, BMPR2, CD28, CTLA4, IDH1, IGFBP5, SLC11A1, PRKAG3, TUBA4A, INHA, ITM2C, COPS7B, U6, 5S_rRNA, SNORD39, oar-let-7d, SNORD82, SNORA75, 7SK, oar-mir-26b, SNORA70, oar-let-7a, Vault
2:134529373:135753568	2	134529373	135753568	1.22419	579		, GSN, KLF4, ID3, ALDOB, C1QA, UBQLN1, NDUFB6, PPIL3, BMPR2, CD28, CTLA4, IDH1, IGFBP5, SLC11A1, PRKAG3, TUBA4A, INHA, ITM2C, COPS7B, U6, 5S_rRNA, SNORD39, oar-let-7d, SNORD82, SNORA75, 7SK, oar-mir-26b, SNORA70, oar-let-7a, Vault
2:137472335:138990640	2	137472335	138990640	1.51831	579		, GSN, KLF4, ID3, ALDOB, C1QA, UBQLN1, NDUFB6, PPIL3, BMPR2, CD28, CTLA4, IDH1, IGFBP5, SLC11A1, PRKAG3, TUBA4A, INHA, ITM2C, COPS7B, U6, 5S_rRNA, SNORD39, oar-let-7d, SNORD82, SNORA75, 7SK, oar-mir-26b, SNORA70, oar-let-7a, Vault
2:141348394:142354112	2	141348394	142354112	1.00572	579		, GSN, KLF4, ID3, ALDOB, C1QA, UBQLN1, NDUFB6, PPIL3, BMPR2, CD28, CTLA4, IDH1, IGFBP5, SLC11A1, PRKAG3, TUBA4A, INHA, ITM2C, COPS7B, U6, 5S_rRNA, SNORD39, oar-let-7d, SNORD82, SNORA75, 7SK, oar-mir-26b, SNORA70, oar-let-7a, Vault
2:14310872:24486377	2	14310872	24486377	10.1755	579		, GSN, KLF4, ID3, ALDOB, C1QA, UBQLN1, NDUFB6, PPIL3, BMPR2, CD28, CTLA4, IDH1, IGFBP5, SLC11A1, PRKAG3, TUBA4A, INHA, ITM2C, COPS7B, U6, 5S_rRNA, SNORD39, oar-let-7d, SNORD82, SNORA75, 7SK, oar-mir-26b, SNORA70, oar-let-7a, Vault
2:170856163:172448710	2	170856163	172448710	1.59255	579		, GSN, KLF4, ID3, ALDOB, C1QA, UBQLN1, NDUFB6, PPIL3, BMPR2, CD28, CTLA4, IDH1, IGFBP5, SLC11A1, PRKAG3, TUBA4A, INHA, ITM2C, COPS7B, U6, 5S_rRNA, SNORD39, oar-let-7d, SNORD82, SNORA75, 7SK, oar-mir-26b, SNORA70, oar-let-7a, Vault
2:178395649:179777814	2	178395649	179777814	1.38217	579		, GSN, KLF4, ID3, ALDOB, C1QA, UBQLN1, NDUFB6, PPIL3, BMPR2, CD28, CTLA4, IDH1, IGFBP5, SLC11A1, PRKAG3, TUBA4A, INHA, ITM2C, COPS7B, U6, 5S_rRNA, SNORD39, oar-let-7d, SNORD82, SNORA75, 7SK, oar-mir-26b, SNORA70, oar-let-7a, Vault
2:189270853:190776324	2	189270853	190776324	1.50547	579		, GSN, KLF4, ID3, ALDOB, C1QA, UBQLN1, NDUFB6, PPIL3, BMPR2, CD28, CTLA4, IDH1, IGFBP5, SLC11A1, PRKAG3, TUBA4A, INHA, ITM2C, COPS7B, U6, 5S_rRNA, SNORD39, oar-let-7d, SNORD82, SNORA75, 7SK, oar-mir-26b, SNORA70, oar-let-7a, Vault
2:200810539:202088645	2	200810539	202088645	1.27811	579		, GSN, KLF4, ID3, ALDOB, C1QA, UBQLN1, NDUFB6, PPIL3, BMPR2, CD28, CTLA4, IDH1, IGFBP5, SLC11A1, PRKAG3, TUBA4A, INHA, ITM2C, COPS7B, U6, 5S_rRNA, SNORD39, oar-let-7d, SNORD82, SNORA75, 7SK, oar-mir-26b, SNORA70, oar-let-7a, Vault
2:202713802:205132747	2	202713802	205132747	2.41894	579		, GSN, KLF4, ID3, ALDOB, C1QA, UBQLN1, NDUFB6, PPIL3, BMPR2, CD28, CTLA4, IDH1, IGFBP5, SLC11A1, PRKAG3, TUBA4A, INHA, ITM2C, COPS7B, U6, 5S_rRNA, SNORD39, oar-let-7d, SNORD82, SNORA75, 7SK, oar-mir-26b, SNORA70, oar-let-7a, Vault
2:205328406:206730874	2	205328406	206730874	1.40247	579		, GSN, KLF4, ID3, ALDOB, C1QA, UBQLN1, NDUFB6, PPIL3, BMPR2, CD28, CTLA4, IDH1, IGFBP5, SLC11A1, PRKAG3, TUBA4A, INHA, ITM2C, COPS7B, U6, 5S_rRNA, SNORD39, oar-let-7d, SNORD82, SNORA75, 7SK, oar-mir-26b, SNORA70, oar-let-7a, Vault
2:207636171:210573326	2	207636171	210573326	2.93716	579		, GSN, KLF4, ID3, ALDOB, C1QA, UBQLN1, NDUFB6, PPIL3, BMPR2, CD28, CTLA4, IDH1, IGFBP5, SLC11A1, PRKAG3, TUBA4A, INHA, ITM2C, COPS7B, U6, 5S_rRNA, SNORD39, oar-let-7d, SNORD82, SNORA75, 7SK, oar-mir-26b, SNORA70, oar-let-7a, Vault
2:211068237:213854526	2	211068237	213854526	2.78629	579		, GSN, KLF4, ID3, ALDOB, C1QA, UBQLN1, NDUFB6, PPIL3, BMPR2, CD28, CTLA4, IDH1, IGFBP5, SLC11A1, PRKAG3, TUBA4A, INHA, ITM2C, COPS7B, U6, 5S_rRNA, SNORD39, oar-let-7d, SNORD82, SNORA75, 7SK, oar-mir-26b, SNORA70, oar-let-7a, Vault
2:214005350:220903491	2	214005350	220903491	6.89814	579		, GSN, KLF4, ID3, ALDOB, C1QA, UBQLN1, NDUFB6, PPIL3, BMPR2, CD28, CTLA4, IDH1, IGFBP5, SLC11A1, PRKAG3, TUBA4A, INHA, ITM2C, COPS7B, U6, 5S_rRNA, SNORD39, oar-let-7d, SNORD82, SNORA75, 7SK, oar-mir-26b, SNORA70, oar-let-7a, Vault
2:224294414:226503167	2	224294414	226503167	2.20875	579		, GSN, KLF4, ID3, ALDOB, C1QA, UBQLN1, NDUFB6, PPIL3, BMPR2, CD28, CTLA4, IDH1, IGFBP5, SLC11A1, PRKAG3, TUBA4A, INHA, ITM2C, COPS7B, U6, 5S_rRNA, SNORD39, oar-let-7d, SNORD82, SNORA75, 7SK, oar-mir-26b, SNORA70, oar-let-7a, Vault
2:231312436:232510155	2	231312436	232510155	1.19772	579		, GSN, KLF4, ID3, ALDOB, C1QA, UBQLN1, NDUFB6, PPIL3, BMPR2, CD28, CTLA4, IDH1, IGFBP5, SLC11A1, PRKAG3, TUBA4A, INHA, ITM2C, COPS7B, U6, 5S_rRNA, SNORD39, oar-let-7d, SNORD82, SNORA75, 7SK, oar-mir-26b, SNORA70, oar-let-7a, Vault
2:241902034:243377905	2	241902034	243377905	1.47587	579		, GSN, KLF4, ID3, ALDOB, C1QA, UBQLN1, NDUFB6, PPIL3, BMPR2, CD28, CTLA4, IDH1, IGFBP5, SLC11A1, PRKAG3, TUBA4A, INHA, ITM2C, COPS7B, U6, 5S_rRNA, SNORD39, oar-let-7d, SNORD82, SNORA75, 7SK, oar-mir-26b, SNORA70, oar-let-7a, Vault
2:27254439:28834822	2	27254439	28834822	1.58038	579		, GSN, KLF4, ID3, ALDOB, C1QA, UBQLN1, NDUFB6, PPIL3, BMPR2, CD28, CTLA4, IDH1, IGFBP5, SLC11A1, PRKAG3, TUBA4A, INHA, ITM2C, COPS7B, U6, 5S_rRNA, SNORD39, oar-let-7d, SNORD82, SNORA75, 7SK, oar-mir-26b, SNORA70, oar-let-7a, Vault
2:31842343:36075528	2	31842343	36075528	4.23318	579		, GSN, KLF4, ID3, ALDOB, C1QA, UBQLN1, NDUFB6, PPIL3, BMPR2, CD28, CTLA4, IDH1, IGFBP5, SLC11A1, PRKAG3, TUBA4A, INHA, ITM2C, COPS7B, U6, 5S_rRNA, SNORD39, oar-let-7d, SNORD82, SNORA75, 7SK, oar-mir-26b, SNORA70, oar-let-7a, Vault
2:66986557:69660591	2	66986557	69660591	2.67403	579		, GSN, KLF4, ID3, ALDOB, C1QA, UBQLN1, NDUFB6, PPIL3, BMPR2, CD28, CTLA4, IDH1, IGFBP5, SLC11A1, PRKAG3, TUBA4A, INHA, ITM2C, COPS7B, U6, 5S_rRNA, SNORD39, oar-let-7d, SNORD82, SNORA75, 7SK, oar-mir-26b, SNORA70, oar-let-7a, Vault
2:91410193:93154886	2	91410193	93154886	1.74469	579		, GSN, KLF4, ID3, ALDOB, C1QA, UBQLN1, NDUFB6, PPIL3, BMPR2, CD28, CTLA4, IDH1, IGFBP5, SLC11A1, PRKAG3, TUBA4A, INHA, ITM2C, COPS7B, U6, 5S_rRNA, SNORD39, oar-let-7d, SNORD82, SNORA75, 7SK, oar-mir-26b, SNORA70, oar-let-7a, Vault
2:93890508:95363944	2	93890508	95363944	1.47344	579		, GSN, KLF4, ID3, ALDOB, C1QA, UBQLN1, NDUFB6, PPIL3, BMPR2, CD28, CTLA4, IDH1, IGFBP5, SLC11A1, PRKAG3, TUBA4A, INHA, ITM2C, COPS7B, U6, 5S_rRNA, SNORD39, oar-let-7d, SNORD82, SNORA75, 7SK, oar-mir-26b, SNORA70, oar-let-7a, Vault
3:105421088:107450296	3	105421088	107450296	2.02921	654		, CLHC1, ABCG8, URM1, TSPAN9, AK1, APOBEC3A, APOBEC3F, PDGFB, ATF4, SLC25A17, TEF, NAGA, EIF3D, IFT27, RBKS, RPS26, IRAK4, GKN1, RAB1A, PDE6H, U6, 5S_rRNA, U2, 7SK, SNORA62, U1, SNORA75, U4, SNORA70, TOB2
3:108627275:109916285	3	108627275	109916285	1.28901	654		, CLHC1, ABCG8, URM1, TSPAN9, AK1, APOBEC3A, APOBEC3F, PDGFB, ATF4, SLC25A17, TEF, NAGA, EIF3D, IFT27, RBKS, RPS26, IRAK4, GKN1, RAB1A, PDE6H, U6, 5S_rRNA, U2, 7SK, SNORA62, U1, SNORA75, U4, SNORA70, TOB2
3:122241058:123693422	3	122241058	123693422	1.45236	654		, CLHC1, ABCG8, URM1, TSPAN9, AK1, APOBEC3A, APOBEC3F, PDGFB, ATF4, SLC25A17, TEF, NAGA, EIF3D, IFT27, RBKS, RPS26, IRAK4, GKN1, RAB1A, PDE6H, U6, 5S_rRNA, U2, 7SK, SNORA62, U1, SNORA75, U4, SNORA70, TOB2
3:141834005:145344922	3	141834005	145344922	3.51092	654		, CLHC1, ABCG8, URM1, TSPAN9, AK1, APOBEC3A, APOBEC3F, PDGFB, ATF4, SLC25A17, TEF, NAGA, EIF3D, IFT27, RBKS, RPS26, IRAK4, GKN1, RAB1A, PDE6H, U6, 5S_rRNA, U2, 7SK, SNORA62, U1, SNORA75, U4, SNORA70, TOB2
3:153024351:154456922	3	153024351	154456922	1.43257	654		, CLHC1, ABCG8, URM1, TSPAN9, AK1, APOBEC3A, APOBEC3F, PDGFB, ATF4, SLC25A17, TEF, NAGA, EIF3D, IFT27, RBKS, RPS26, IRAK4, GKN1, RAB1A, PDE6H, U6, 5S_rRNA, U2, 7SK, SNORA62, U1, SNORA75, U4, SNORA70, TOB2
3:168042903:169216015	3	168042903	169216015	1.17311	654		, CLHC1, ABCG8, URM1, TSPAN9, AK1, APOBEC3A, APOBEC3F, PDGFB, ATF4, SLC25A17, TEF, NAGA, EIF3D, IFT27, RBKS, RPS26, IRAK4, GKN1, RAB1A, PDE6H, U6, 5S_rRNA, U2, 7SK, SNORA62, U1, SNORA75, U4, SNORA70, TOB2
3:179571961:182435398	3	179571961	182435398	2.86344	654		, CLHC1, ABCG8, URM1, TSPAN9, AK1, APOBEC3A, APOBEC3F, PDGFB, ATF4, SLC25A17, TEF, NAGA, EIF3D, IFT27, RBKS, RPS26, IRAK4, GKN1, RAB1A, PDE6H, U6, 5S_rRNA, U2, 7SK, SNORA62, U1, SNORA75, U4, SNORA70, TOB2
3:190243241:191701383	3	190243241	191701383	1.45814	654		, CLHC1, ABCG8, URM1, TSPAN9, AK1, APOBEC3A, APOBEC3F, PDGFB, ATF4, SLC25A17, TEF, NAGA, EIF3D, IFT27, RBKS, RPS26, IRAK4, GKN1, RAB1A, PDE6H, U6, 5S_rRNA, U2, 7SK, SNORA62, U1, SNORA75, U4, SNORA70, TOB2
3:199761189:200888015	3	199761189	200888015	1.12683	654		, CLHC1, ABCG8, URM1, TSPAN9, AK1, APOBEC3A, APOBEC3F, PDGFB, ATF4, SLC25A17, TEF, NAGA, EIF3D, IFT27, RBKS, RPS26, IRAK4, GKN1, RAB1A, PDE6H, U6, 5S_rRNA, U2, 7SK, SNORA62, U1, SNORA75, U4, SNORA70, TOB2
3:202082083:203725598	3	202082083	203725598	1.64352	654		, CLHC1, ABCG8, URM1, TSPAN9, AK1, APOBEC3A, APOBEC3F, PDGFB, ATF4, SLC25A17, TEF, NAGA, EIF3D, IFT27, RBKS, RPS26, IRAK4, GKN1, RAB1A, PDE6H, U6, 5S_rRNA, U2, 7SK, SNORA62, U1, SNORA75, U4, SNORA70, TOB2
3:20675653:23132954	3	20675653	23132954	2.4573	654		, CLHC1, ABCG8, URM1, TSPAN9, AK1, APOBEC3A, APOBEC3F, PDGFB, ATF4, SLC25A17, TEF, NAGA, EIF3D, IFT27, RBKS, RPS26, IRAK4, GKN1, RAB1A, PDE6H, U6, 5S_rRNA, U2, 7SK, SNORA62, U1, SNORA75, U4, SNORA70, TOB2
3:210336734:212034158	3	210336734	212034158	1.69742	654		, CLHC1, ABCG8, URM1, TSPAN9, AK1, APOBEC3A, APOBEC3F, PDGFB, ATF4, SLC25A17, TEF, NAGA, EIF3D, IFT27, RBKS, RPS26, IRAK4, GKN1, RAB1A, PDE6H, U6, 5S_rRNA, U2, 7SK, SNORA62, U1, SNORA75, U4, SNORA70, TOB2
3:212368463:213536157	3	212368463	213536157	1.16769	654		, CLHC1, ABCG8, URM1, TSPAN9, AK1, APOBEC3A, APOBEC3F, PDGFB, ATF4, SLC25A17, TEF, NAGA, EIF3D, IFT27, RBKS, RPS26, IRAK4, GKN1, RAB1A, PDE6H, U6, 5S_rRNA, U2, 7SK, SNORA62, U1, SNORA75, U4, SNORA70, TOB2
3:213824504:217026736	3	213824504	217026736	3.20223	654		, CLHC1, ABCG8, URM1, TSPAN9, AK1, APOBEC3A, APOBEC3F, PDGFB, ATF4, SLC25A17, TEF, NAGA, EIF3D, IFT27, RBKS, RPS26, IRAK4, GKN1, RAB1A, PDE6H, U6, 5S_rRNA, U2, 7SK, SNORA62, U1, SNORA75, U4, SNORA70, TOB2
3:34209284:37040494	3	34209284	37040494	2.83121	654		, CLHC1, ABCG8, URM1, TSPAN9, AK1, APOBEC3A, APOBEC3F, PDGFB, ATF4, SLC25A17, TEF, NAGA, EIF3D, IFT27, RBKS, RPS26, IRAK4, GKN1, RAB1A, PDE6H, U6, 5S_rRNA, U2, 7SK, SNORA62, U1, SNORA75, U4, SNORA70, TOB2
3:37738705:40285089	3	37738705	40285089	2.54638	654		, CLHC1, ABCG8, URM1, TSPAN9, AK1, APOBEC3A, APOBEC3F, PDGFB, ATF4, SLC25A17, TEF, NAGA, EIF3D, IFT27, RBKS, RPS26, IRAK4, GKN1, RAB1A, PDE6H, U6, 5S_rRNA, U2, 7SK, SNORA62, U1, SNORA75, U4, SNORA70, TOB2
3:40614404:44737428	3	40614404	44737428	4.12302	654		, CLHC1, ABCG8, URM1, TSPAN9, AK1, APOBEC3A, APOBEC3F, PDGFB, ATF4, SLC25A17, TEF, NAGA, EIF3D, IFT27, RBKS, RPS26, IRAK4, GKN1, RAB1A, PDE6H, U6, 5S_rRNA, U2, 7SK, SNORA62, U1, SNORA75, U4, SNORA70, TOB2
3:45905654:47087229	3	45905654	47087229	1.18158	654		, CLHC1, ABCG8, URM1, TSPAN9, AK1, APOBEC3A, APOBEC3F, PDGFB, ATF4, SLC25A17, TEF, NAGA, EIF3D, IFT27, RBKS, RPS26, IRAK4, GKN1, RAB1A, PDE6H, U6, 5S_rRNA, U2, 7SK, SNORA62, U1, SNORA75, U4, SNORA70, TOB2
3:63693985:69285128	3	63693985	69285128	5.59114	654		, CLHC1, ABCG8, URM1, TSPAN9, AK1, APOBEC3A, APOBEC3F, PDGFB, ATF4, SLC25A17, TEF, NAGA, EIF3D, IFT27, RBKS, RPS26, IRAK4, GKN1, RAB1A, PDE6H, U6, 5S_rRNA, U2, 7SK, SNORA62, U1, SNORA75, U4, SNORA70, TOB2
3:6512841:8452961	3	6512841	8452961	1.94012	654		, CLHC1, ABCG8, URM1, TSPAN9, AK1, APOBEC3A, APOBEC3F, PDGFB, ATF4, SLC25A17, TEF, NAGA, EIF3D, IFT27, RBKS, RPS26, IRAK4, GKN1, RAB1A, PDE6H, U6, 5S_rRNA, U2, 7SK, SNORA62, U1, SNORA75, U4, SNORA70, TOB2
3:69367462:70777687	3	69367462	70777687	1.41023	654		, CLHC1, ABCG8, URM1, TSPAN9, AK1, APOBEC3A, APOBEC3F, PDGFB, ATF4, SLC25A17, TEF, NAGA, EIF3D, IFT27, RBKS, RPS26, IRAK4, GKN1, RAB1A, PDE6H, U6, 5S_rRNA, U2, 7SK, SNORA62, U1, SNORA75, U4, SNORA70, TOB2
3:71613411:73436500	3	71613411	73436500	1.82309	654		, CLHC1, ABCG8, URM1, TSPAN9, AK1, APOBEC3A, APOBEC3F, PDGFB, ATF4, SLC25A17, TEF, NAGA, EIF3D, IFT27, RBKS, RPS26, IRAK4, GKN1, RAB1A, PDE6H, U6, 5S_rRNA, U2, 7SK, SNORA62, U1, SNORA75, U4, SNORA70, TOB2
3:80343638:82538496	3	80343638	82538496	2.19486	654		, CLHC1, ABCG8, URM1, TSPAN9, AK1, APOBEC3A, APOBEC3F, PDGFB, ATF4, SLC25A17, TEF, NAGA, EIF3D, IFT27, RBKS, RPS26, IRAK4, GKN1, RAB1A, PDE6H, U6, 5S_rRNA, U2, 7SK, SNORA62, U1, SNORA75, U4, SNORA70, TOB2
3:84348827:85797143	3	84348827	85797143	1.44832	654		, CLHC1, ABCG8, URM1, TSPAN9, AK1, APOBEC3A, APOBEC3F, PDGFB, ATF4, SLC25A17, TEF, NAGA, EIF3D, IFT27, RBKS, RPS26, IRAK4, GKN1, RAB1A, PDE6H, U6, 5S_rRNA, U2, 7SK, SNORA62, U1, SNORA75, U4, SNORA70, TOB2
3:90298245:92020141	3	90298245	92020141	1.7219	654		, CLHC1, ABCG8, URM1, TSPAN9, AK1, APOBEC3A, APOBEC3F, PDGFB, ATF4, SLC25A17, TEF, NAGA, EIF3D, IFT27, RBKS, RPS26, IRAK4, GKN1, RAB1A, PDE6H, U6, 5S_rRNA, U2, 7SK, SNORA62, U1, SNORA75, U4, SNORA70, TOB2
3:920144:2057197	3	920144	2057197	1.13705	654		, CLHC1, ABCG8, URM1, TSPAN9, AK1, APOBEC3A, APOBEC3F, PDGFB, ATF4, SLC25A17, TEF, NAGA, EIF3D, IFT27, RBKS, RPS26, IRAK4, GKN1, RAB1A, PDE6H, U6, 5S_rRNA, U2, 7SK, SNORA62, U1, SNORA75, U4, SNORA70, TOB2
4:105455685:106610466	4	105455685	106610466	1.15478	518		, MET, CAV1, CAV2, TES, ARF5, CDK5, RHEB, CHCHD3, SLC26A3, LSM5, GHRHR, AQP1, PRR15, CTTNBP2, NPVF, SRI, INHBA, CFTR, ASZ1, WNT2, ST7, 5S_rRNA, U6, oar-mir-148a, 7SK, Y_RNA, U4, Vault, SNORA70
4:108705459:114475732	4	108705459	114475732	5.77027	518		, MET, CAV1, CAV2, TES, ARF5, CDK5, RHEB, CHCHD3, SLC26A3, LSM5, GHRHR, AQP1, PRR15, CTTNBP2, NPVF, SRI, INHBA, CFTR, ASZ1, WNT2, ST7, 5S_rRNA, U6, oar-mir-148a, 7SK, Y_RNA, U4, Vault, SNORA70
4:115829682:117187718	4	115829682	117187718	1.35804	518		, MET, CAV1, CAV2, TES, ARF5, CDK5, RHEB, CHCHD3, SLC26A3, LSM5, GHRHR, AQP1, PRR15, CTTNBP2, NPVF, SRI, INHBA, CFTR, ASZ1, WNT2, ST7, 5S_rRNA, U6, oar-mir-148a, 7SK, Y_RNA, U4, Vault, SNORA70
4:12987489:14731380	4	12987489	14731380	1.74389	518		, MET, CAV1, CAV2, TES, ARF5, CDK5, RHEB, CHCHD3, SLC26A3, LSM5, GHRHR, AQP1, PRR15, CTTNBP2, NPVF, SRI, INHBA, CFTR, ASZ1, WNT2, ST7, 5S_rRNA, U6, oar-mir-148a, 7SK, Y_RNA, U4, Vault, SNORA70
4:36207905:38176949	4	36207905	38176949	1.96904	518		, MET, CAV1, CAV2, TES, ARF5, CDK5, RHEB, CHCHD3, SLC26A3, LSM5, GHRHR, AQP1, PRR15, CTTNBP2, NPVF, SRI, INHBA, CFTR, ASZ1, WNT2, ST7, 5S_rRNA, U6, oar-mir-148a, 7SK, Y_RNA, U4, Vault, SNORA70
4:45640097:56089343	4	45640097	56089343	10.4492	518		, MET, CAV1, CAV2, TES, ARF5, CDK5, RHEB, CHCHD3, SLC26A3, LSM5, GHRHR, AQP1, PRR15, CTTNBP2, NPVF, SRI, INHBA, CFTR, ASZ1, WNT2, ST7, 5S_rRNA, U6, oar-mir-148a, 7SK, Y_RNA, U4, Vault, SNORA70
4:56510465:75024952	4	56510465	75024952	18.5145	518		, MET, CAV1, CAV2, TES, ARF5, CDK5, RHEB, CHCHD3, SLC26A3, LSM5, GHRHR, AQP1, PRR15, CTTNBP2, NPVF, SRI, INHBA, CFTR, ASZ1, WNT2, ST7, 5S_rRNA, U6, oar-mir-148a, 7SK, Y_RNA, U4, Vault, SNORA70
4:78053478:79657781	4	78053478	79657781	1.6043	518		, MET, CAV1, CAV2, TES, ARF5, CDK5, RHEB, CHCHD3, SLC26A3, LSM5, GHRHR, AQP1, PRR15, CTTNBP2, NPVF, SRI, INHBA, CFTR, ASZ1, WNT2, ST7, 5S_rRNA, U6, oar-mir-148a, 7SK, Y_RNA, U4, Vault, SNORA70
4:8154782:10559577	4	8154782	10559577	2.4048	518		, MET, CAV1, CAV2, TES, ARF5, CDK5, RHEB, CHCHD3, SLC26A3, LSM5, GHRHR, AQP1, PRR15, CTTNBP2, NPVF, SRI, INHBA, CFTR, ASZ1, WNT2, ST7, 5S_rRNA, U6, oar-mir-148a, 7SK, Y_RNA, U4, Vault, SNORA70
4:91847722:94037071	4	91847722	94037071	2.18935	518		, MET, CAV1, CAV2, TES, ARF5, CDK5, RHEB, CHCHD3, SLC26A3, LSM5, GHRHR, AQP1, PRR15, CTTNBP2, NPVF, SRI, INHBA, CFTR, ASZ1, WNT2, ST7, 5S_rRNA, U6, oar-mir-148a, 7SK, Y_RNA, U4, Vault, SNORA70
4:95154756:96614724	4	95154756	96614724	1.45997	518		, MET, CAV1, CAV2, TES, ARF5, CDK5, RHEB, CHCHD3, SLC26A3, LSM5, GHRHR, AQP1, PRR15, CTTNBP2, NPVF, SRI, INHBA, CFTR, ASZ1, WNT2, ST7, 5S_rRNA, U6, oar-mir-148a, 7SK, Y_RNA, U4, Vault, SNORA70
4:97506315:98932644	4	97506315	98932644	1.42633	518		, MET, CAV1, CAV2, TES, ARF5, CDK5, RHEB, CHCHD3, SLC26A3, LSM5, GHRHR, AQP1, PRR15, CTTNBP2, NPVF, SRI, INHBA, CFTR, ASZ1, WNT2, ST7, 5S_rRNA, U6, oar-mir-148a, 7SK, Y_RNA, U4, Vault, SNORA70
5:100156417:102097247	5	100156417	102097247	1.94083	529		, RAB8A, SQSTM1, SLC34A1, ZNF333, B4GALT7, PRKACA, MYOZ3, SPARC, ATOX1, PRDX2, ASNA1, IL12B, GABRB2, IL4, IL13, INSL3, IL5, IRF1, EIF3G, DNMT1, CSF2, IL3, ICAM1, BST-2B, CAST, U6, 5S_rRNA, SNORA70, U1, 7SK, oar-mir-23a, U4, U2, oar-mir-27a, Y_RNA, BST-2A
5:104570871:105926150	5	104570871	105926150	1.35528	529		, RAB8A, SQSTM1, SLC34A1, ZNF333, B4GALT7, PRKACA, MYOZ3, SPARC, ATOX1, PRDX2, ASNA1, IL12B, GABRB2, IL4, IL13, INSL3, IL5, IRF1, EIF3G, DNMT1, CSF2, IL3, ICAM1, BST-2B, CAST, U6, 5S_rRNA, SNORA70, U1, 7SK, oar-mir-23a, U4, U2, oar-mir-27a, Y_RNA, BST-2A
5:11528320:12777646	5	11528320	12777646	1.24933	529		, RAB8A, SQSTM1, SLC34A1, ZNF333, B4GALT7, PRKACA, MYOZ3, SPARC, ATOX1, PRDX2, ASNA1, IL12B, GABRB2, IL4, IL13, INSL3, IL5, IRF1, EIF3G, DNMT1, CSF2, IL3, ICAM1, BST-2B, CAST, U6, 5S_rRNA, SNORA70, U1, 7SK, oar-mir-23a, U4, U2, oar-mir-27a, Y_RNA, BST-2A
5:18902088:21226941	5	18902088	21226941	2.32485	529		, RAB8A, SQSTM1, SLC34A1, ZNF333, B4GALT7, PRKACA, MYOZ3, SPARC, ATOX1, PRDX2, ASNA1, IL12B, GABRB2, IL4, IL13, INSL3, IL5, IRF1, EIF3G, DNMT1, CSF2, IL3, ICAM1, BST-2B, CAST, U6, 5S_rRNA, SNORA70, U1, 7SK, oar-mir-23a, U4, U2, oar-mir-27a, Y_RNA, BST-2A
5:29994502:31402323	5	29994502	31402323	1.40782	529		, RAB8A, SQSTM1, SLC34A1, ZNF333, B4GALT7, PRKACA, MYOZ3, SPARC, ATOX1, PRDX2, ASNA1, IL12B, GABRB2, IL4, IL13, INSL3, IL5, IRF1, EIF3G, DNMT1, CSF2, IL3, ICAM1, BST-2B, CAST, U6, 5S_rRNA, SNORA70, U1, 7SK, oar-mir-23a, U4, U2, oar-mir-27a, Y_RNA, BST-2A
5:34885600:36524905	5	34885600	36524905	1.63931	529		, RAB8A, SQSTM1, SLC34A1, ZNF333, B4GALT7, PRKACA, MYOZ3, SPARC, ATOX1, PRDX2, ASNA1, IL12B, GABRB2, IL4, IL13, INSL3, IL5, IRF1, EIF3G, DNMT1, CSF2, IL3, ICAM1, BST-2B, CAST, U6, 5S_rRNA, SNORA70, U1, 7SK, oar-mir-23a, U4, U2, oar-mir-27a, Y_RNA, BST-2A
5:38451613:39893053	5	38451613	39893053	1.44144	529		, RAB8A, SQSTM1, SLC34A1, ZNF333, B4GALT7, PRKACA, MYOZ3, SPARC, ATOX1, PRDX2, ASNA1, IL12B, GABRB2, IL4, IL13, INSL3, IL5, IRF1, EIF3G, DNMT1, CSF2, IL3, ICAM1, BST-2B, CAST, U6, 5S_rRNA, SNORA70, U1, 7SK, oar-mir-23a, U4, U2, oar-mir-27a, Y_RNA, BST-2A
5:5108249:6846569	5	5108249	6846569	1.73832	529		, RAB8A, SQSTM1, SLC34A1, ZNF333, B4GALT7, PRKACA, MYOZ3, SPARC, ATOX1, PRDX2, ASNA1, IL12B, GABRB2, IL4, IL13, INSL3, IL5, IRF1, EIF3G, DNMT1, CSF2, IL3, ICAM1, BST-2B, CAST, U6, 5S_rRNA, SNORA70, U1, 7SK, oar-mir-23a, U4, U2, oar-mir-27a, Y_RNA, BST-2A
5:59260702:61776342	5	59260702	61776342	2.51564	529		, RAB8A, SQSTM1, SLC34A1, ZNF333, B4GALT7, PRKACA, MYOZ3, SPARC, ATOX1, PRDX2, ASNA1, IL12B, GABRB2, IL4, IL13, INSL3, IL5, IRF1, EIF3G, DNMT1, CSF2, IL3, ICAM1, BST-2B, CAST, U6, 5S_rRNA, SNORA70, U1, 7SK, oar-mir-23a, U4, U2, oar-mir-27a, Y_RNA, BST-2A
5:64200758:84591689	5	64200758	84591689	20.3909	529		, RAB8A, SQSTM1, SLC34A1, ZNF333, B4GALT7, PRKACA, MYOZ3, SPARC, ATOX1, PRDX2, ASNA1, IL12B, GABRB2, IL4, IL13, INSL3, IL5, IRF1, EIF3G, DNMT1, CSF2, IL3, ICAM1, BST-2B, CAST, U6, 5S_rRNA, SNORA70, U1, 7SK, oar-mir-23a, U4, U2, oar-mir-27a, Y_RNA, BST-2A
5:89007214:90038501	5	89007214	90038501	1.03129	529		, RAB8A, SQSTM1, SLC34A1, ZNF333, B4GALT7, PRKACA, MYOZ3, SPARC, ATOX1, PRDX2, ASNA1, IL12B, GABRB2, IL4, IL13, INSL3, IL5, IRF1, EIF3G, DNMT1, CSF2, IL3, ICAM1, BST-2B, CAST, U6, 5S_rRNA, SNORA70, U1, 7SK, oar-mir-23a, U4, U2, oar-mir-27a, Y_RNA, BST-2A
5:9045008:10938908	5	9045008	10938908	1.8939	529		, RAB8A, SQSTM1, SLC34A1, ZNF333, B4GALT7, PRKACA, MYOZ3, SPARC, ATOX1, PRDX2, ASNA1, IL12B, GABRB2, IL4, IL13, INSL3, IL5, IRF1, EIF3G, DNMT1, CSF2, IL3, ICAM1, BST-2B, CAST, U6, 5S_rRNA, SNORA70, U1, 7SK, oar-mir-23a, U4, U2, oar-mir-27a, Y_RNA, BST-2A
5:90586440:93037015	5	90586440	93037015	2.45058	529		, RAB8A, SQSTM1, SLC34A1, ZNF333, B4GALT7, PRKACA, MYOZ3, SPARC, ATOX1, PRDX2, ASNA1, IL12B, GABRB2, IL4, IL13, INSL3, IL5, IRF1, EIF3G, DNMT1, CSF2, IL3, ICAM1, BST-2B, CAST, U6, 5S_rRNA, SNORA70, U1, 7SK, oar-mir-23a, U4, U2, oar-mir-27a, Y_RNA, BST-2A
5:91775:1205720	5	91775	1205720	1.11394	529		, RAB8A, SQSTM1, SLC34A1, ZNF333, B4GALT7, PRKACA, MYOZ3, SPARC, ATOX1, PRDX2, ASNA1, IL12B, GABRB2, IL4, IL13, INSL3, IL5, IRF1, EIF3G, DNMT1, CSF2, IL3, ICAM1, BST-2B, CAST, U6, 5S_rRNA, SNORA70, U1, 7SK, oar-mir-23a, U4, U2, oar-mir-27a, Y_RNA, BST-2A
5:93233297:95161438	5	93233297	95161438	1.92814	529		, RAB8A, SQSTM1, SLC34A1, ZNF333, B4GALT7, PRKACA, MYOZ3, SPARC, ATOX1, PRDX2, ASNA1, IL12B, GABRB2, IL4, IL13, INSL3, IL5, IRF1, EIF3G, DNMT1, CSF2, IL3, ICAM1, BST-2B, CAST, U6, 5S_rRNA, SNORA70, U1, 7SK, oar-mir-23a, U4, U2, oar-mir-27a, Y_RNA, BST-2A
5:95595386:97644679	5	95595386	97644679	2.04929	529		, RAB8A, SQSTM1, SLC34A1, ZNF333, B4GALT7, PRKACA, MYOZ3, SPARC, ATOX1, PRDX2, ASNA1, IL12B, GABRB2, IL4, IL13, INSL3, IL5, IRF1, EIF3G, DNMT1, CSF2, IL3, ICAM1, BST-2B, CAST, U6, 5S_rRNA, SNORA70, U1, 7SK, oar-mir-23a, U4, U2, oar-mir-27a, Y_RNA, BST-2A
5:97815784:99364931	5	97815784	99364931	1.54915	529		, RAB8A, SQSTM1, SLC34A1, ZNF333, B4GALT7, PRKACA, MYOZ3, SPARC, ATOX1, PRDX2, ASNA1, IL12B, GABRB2, IL4, IL13, INSL3, IL5, IRF1, EIF3G, DNMT1, CSF2, IL3, ICAM1, BST-2B, CAST, U6, 5S_rRNA, SNORA70, U1, 7SK, oar-mir-23a, U4, U2, oar-mir-27a, Y_RNA, BST-2A
6:101750627:103642796	6	101750627	103642796	1.89217	306		, TLR10, TLR1, TLR6, ABCG2, SPP1, NUDT9, GNRHR, RAB28, UGT2B7, CSN1S2, CSN3, LIAS, H2AZ1, BMPR1B, U6, 5S_rRNA, U1, SNORA70
6:105016420:106556154	6	105016420	106556154	1.53973	306		, TLR10, TLR1, TLR6, ABCG2, SPP1, NUDT9, GNRHR, RAB28, UGT2B7, CSN1S2, CSN3, LIAS, H2AZ1, BMPR1B, U6, 5S_rRNA, U1, SNORA70
6:107791363:108806933	6	107791363	108806933	1.01557	306		, TLR10, TLR1, TLR6, ABCG2, SPP1, NUDT9, GNRHR, RAB28, UGT2B7, CSN1S2, CSN3, LIAS, H2AZ1, BMPR1B, U6, 5S_rRNA, U1, SNORA70
6:112733668:113957514	6	112733668	113957514	1.22385	306		, TLR10, TLR1, TLR6, ABCG2, SPP1, NUDT9, GNRHR, RAB28, UGT2B7, CSN1S2, CSN3, LIAS, H2AZ1, BMPR1B, U6, 5S_rRNA, U1, SNORA70
6:22362351:24010950	6	22362351	24010950	1.6486	306		, TLR10, TLR1, TLR6, ABCG2, SPP1, NUDT9, GNRHR, RAB28, UGT2B7, CSN1S2, CSN3, LIAS, H2AZ1, BMPR1B, U6, 5S_rRNA, U1, SNORA70
6:24157625:45948943	6	24157625	45948943	21.7913	306		, TLR10, TLR1, TLR6, ABCG2, SPP1, NUDT9, GNRHR, RAB28, UGT2B7, CSN1S2, CSN3, LIAS, H2AZ1, BMPR1B, U6, 5S_rRNA, U1, SNORA70
6:48565378:51346457	6	48565378	51346457	2.78108	306		, TLR10, TLR1, TLR6, ABCG2, SPP1, NUDT9, GNRHR, RAB28, UGT2B7, CSN1S2, CSN3, LIAS, H2AZ1, BMPR1B, U6, 5S_rRNA, U1, SNORA70
6:54215386:58563380	6	54215386	58563380	4.34799	306		, TLR10, TLR1, TLR6, ABCG2, SPP1, NUDT9, GNRHR, RAB28, UGT2B7, CSN1S2, CSN3, LIAS, H2AZ1, BMPR1B, U6, 5S_rRNA, U1, SNORA70
6:60295216:63660401	6	60295216	63660401	3.36518	306		, TLR10, TLR1, TLR6, ABCG2, SPP1, NUDT9, GNRHR, RAB28, UGT2B7, CSN1S2, CSN3, LIAS, H2AZ1, BMPR1B, U6, 5S_rRNA, U1, SNORA70
6:67376317:69100722	6	67376317	69100722	1.7244	306		, TLR10, TLR1, TLR6, ABCG2, SPP1, NUDT9, GNRHR, RAB28, UGT2B7, CSN1S2, CSN3, LIAS, H2AZ1, BMPR1B, U6, 5S_rRNA, U1, SNORA70
6:82573216:84116999	6	82573216	84116999	1.54378	306		, TLR10, TLR1, TLR6, ABCG2, SPP1, NUDT9, GNRHR, RAB28, UGT2B7, CSN1S2, CSN3, LIAS, H2AZ1, BMPR1B, U6, 5S_rRNA, U1, SNORA70
6:85263669:86903129	6	85263669	86903129	1.63946	306		, TLR10, TLR1, TLR6, ABCG2, SPP1, NUDT9, GNRHR, RAB28, UGT2B7, CSN1S2, CSN3, LIAS, H2AZ1, BMPR1B, U6, 5S_rRNA, U1, SNORA70
6:92730863:94055809	6	92730863	94055809	1.32495	306		, TLR10, TLR1, TLR6, ABCG2, SPP1, NUDT9, GNRHR, RAB28, UGT2B7, CSN1S2, CSN3, LIAS, H2AZ1, BMPR1B, U6, 5S_rRNA, U1, SNORA70
7:126066:3563266	7	126066	3563266	3.4372	498		, ARF6, CIPC, SLIRP, CLN6, CAPN3, PYGL, TPM1, ANXA2, CYP19, TRPM7, FGF7, SLC24A5, DUOX2, BMP4, SIX6, SIX1, ESR2, U1, U6, 5S_rRNA, U7, SNORD16, Y_RNA, SNORD18, Metazoa_SRP, U2, 7SK, SNORA70, SNORA72
7:13194775:15034944	7	13194775	15034944	1.84017	498		, ARF6, CIPC, SLIRP, CLN6, CAPN3, PYGL, TPM1, ANXA2, CYP19, TRPM7, FGF7, SLC24A5, DUOX2, BMP4, SIX6, SIX1, ESR2, U1, U6, 5S_rRNA, U7, SNORD16, Y_RNA, SNORD18, Metazoa_SRP, U2, 7SK, SNORA70, SNORA72
7:34080913:36260154	7	34080913	36260154	2.17924	498		, ARF6, CIPC, SLIRP, CLN6, CAPN3, PYGL, TPM1, ANXA2, CYP19, TRPM7, FGF7, SLC24A5, DUOX2, BMP4, SIX6, SIX1, ESR2, U1, U6, 5S_rRNA, U7, SNORD16, Y_RNA, SNORD18, Metazoa_SRP, U2, 7SK, SNORA70, SNORA72
7:39165289:41100706	7	39165289	41100706	1.93542	498		, ARF6, CIPC, SLIRP, CLN6, CAPN3, PYGL, TPM1, ANXA2, CYP19, TRPM7, FGF7, SLC24A5, DUOX2, BMP4, SIX6, SIX1, ESR2, U1, U6, 5S_rRNA, U7, SNORD16, Y_RNA, SNORD18, Metazoa_SRP, U2, 7SK, SNORA70, SNORA72
7:41517326:53046781	7	41517326	53046781	11.5295	498		, ARF6, CIPC, SLIRP, CLN6, CAPN3, PYGL, TPM1, ANXA2, CYP19, TRPM7, FGF7, SLC24A5, DUOX2, BMP4, SIX6, SIX1, ESR2, U1, U6, 5S_rRNA, U7, SNORD16, Y_RNA, SNORD18, Metazoa_SRP, U2, 7SK, SNORA70, SNORA72
7:54024422:74435439	7	54024422	74435439	20.411	498		, ARF6, CIPC, SLIRP, CLN6, CAPN3, PYGL, TPM1, ANXA2, CYP19, TRPM7, FGF7, SLC24A5, DUOX2, BMP4, SIX6, SIX1, ESR2, U1, U6, 5S_rRNA, U7, SNORD16, Y_RNA, SNORD18, Metazoa_SRP, U2, 7SK, SNORA70, SNORA72
7:76941227:78410235	7	76941227	78410235	1.46901	498		, ARF6, CIPC, SLIRP, CLN6, CAPN3, PYGL, TPM1, ANXA2, CYP19, TRPM7, FGF7, SLC24A5, DUOX2, BMP4, SIX6, SIX1, ESR2, U1, U6, 5S_rRNA, U7, SNORD16, Y_RNA, SNORD18, Metazoa_SRP, U2, 7SK, SNORA70, SNORA72
7:80844562:82688100	7	80844562	82688100	1.84354	498		, ARF6, CIPC, SLIRP, CLN6, CAPN3, PYGL, TPM1, ANXA2, CYP19, TRPM7, FGF7, SLC24A5, DUOX2, BMP4, SIX6, SIX1, ESR2, U1, U6, 5S_rRNA, U7, SNORD16, Y_RNA, SNORD18, Metazoa_SRP, U2, 7SK, SNORA70, SNORA72
7:85028278:86632055	7	85028278	86632055	1.60378	498		, ARF6, CIPC, SLIRP, CLN6, CAPN3, PYGL, TPM1, ANXA2, CYP19, TRPM7, FGF7, SLC24A5, DUOX2, BMP4, SIX6, SIX1, ESR2, U1, U6, 5S_rRNA, U7, SNORD16, Y_RNA, SNORD18, Metazoa_SRP, U2, 7SK, SNORA70, SNORA72
7:8745177:10069253	7	8745177	10069253	1.32408	498		, ARF6, CIPC, SLIRP, CLN6, CAPN3, PYGL, TPM1, ANXA2, CYP19, TRPM7, FGF7, SLC24A5, DUOX2, BMP4, SIX6, SIX1, ESR2, U1, U6, 5S_rRNA, U7, SNORD16, Y_RNA, SNORD18, Metazoa_SRP, U2, 7SK, SNORA70, SNORA72
7:91951007:93653726	7	91951007	93653726	1.70272	498		, ARF6, CIPC, SLIRP, CLN6, CAPN3, PYGL, TPM1, ANXA2, CYP19, TRPM7, FGF7, SLC24A5, DUOX2, BMP4, SIX6, SIX1, ESR2, U1, U6, 5S_rRNA, U7, SNORD16, Y_RNA, SNORD18, Metazoa_SRP, U2, 7SK, SNORA70, SNORA72
8:19866136:22482417	8	19866136	22482417	2.61628	118		, U6, 7SK, 5S_rRNA
8:22636036:25778165	8	22636036	25778165	3.14213	118		, U6, 7SK, 5S_rRNA
8:40332833:46516895	8	40332833	46516895	6.18406	118		, U6, 7SK, 5S_rRNA
8:6573323:9532600	8	6573323	9532600	2.95928	118		, U6, 7SK, 5S_rRNA
8:84067219:86741675	8	84067219	86741675	2.67446	118		, U6, 7SK, 5S_rRNA
8:87869641:88991389	8	87869641	88991389	1.12175	118		, U6, 7SK, 5S_rRNA
8:89732313:90797860	8	89732313	90797860	1.06555	118		, U6, 7SK, 5S_rRNA
9:23882835:40185738	9	23882835	40185738	16.3029	372		, IL7, MYC, SQLE, FABP5, FABP4, EIF3H, OOEP, SNAI2, DGAT1, LYN, SDR16C5, MCMDC2, oar-mir-30a, U6, U1, 7SK, 5S_rRNA, U2, Metazoa_SRP, Vault
9:254035:18485140	9	254035	18485140	18.2311	372		, IL7, MYC, SQLE, FABP5, FABP4, EIF3H, OOEP, SNAI2, DGAT1, LYN, SDR16C5, MCMDC2, oar-mir-30a, U6, U1, 7SK, 5S_rRNA, U2, Metazoa_SRP, Vault
9:42274206:43381019	9	42274206	43381019	1.10681	372		, IL7, MYC, SQLE, FABP5, FABP4, EIF3H, OOEP, SNAI2, DGAT1, LYN, SDR16C5, MCMDC2, oar-mir-30a, U6, U1, 7SK, 5S_rRNA, U2, Metazoa_SRP, Vault
9:43620900:45864372	9	43620900	45864372	2.24347	372		, IL7, MYC, SQLE, FABP5, FABP4, EIF3H, OOEP, SNAI2, DGAT1, LYN, SDR16C5, MCMDC2, oar-mir-30a, U6, U1, 7SK, 5S_rRNA, U2, Metazoa_SRP, Vault
9:51500277:58187054	9	51500277	58187054	6.68678	372		, IL7, MYC, SQLE, FABP5, FABP4, EIF3H, OOEP, SNAI2, DGAT1, LYN, SDR16C5, MCMDC2, oar-mir-30a, U6, U1, 7SK, 5S_rRNA, U2, Metazoa_SRP, Vault
9:59297092:60739832	9	59297092	60739832	1.44274	372		, IL7, MYC, SQLE, FABP5, FABP4, EIF3H, OOEP, SNAI2, DGAT1, LYN, SDR16C5, MCMDC2, oar-mir-30a, U6, U1, 7SK, 5S_rRNA, U2, Metazoa_SRP, Vault
9:71117035:72340948	9	71117035	72340948	1.22391	372		, IL7, MYC, SQLE, FABP5, FABP4, EIF3H, OOEP, SNAI2, DGAT1, LYN, SDR16C5, MCMDC2, oar-mir-30a, U6, U1, 7SK, 5S_rRNA, U2, Metazoa_SRP, Vault
9:86803360:88025309	9	86803360	88025309	1.22195	372		, IL7, MYC, SQLE, FABP5, FABP4, EIF3H, OOEP, SNAI2, DGAT1, LYN, SDR16C5, MCMDC2, oar-mir-30a, U6, U1, 7SK, 5S_rRNA, U2, Metazoa_SRP, Vault
