# Supplementary material for: Comparative Detection of Selection Signatures in Indigenous and Crossbred Turkish Sheep Breeds
Source: Research Square preprint supplement (doi:10.21203/rs.3.rs-7364156/v1), 2025-09-09
Supplement: Supplementary file 2 [file 268ac5e3a5bb1a2de0e8b815.xlsx]

## Sheet: Sheet1
	Table S1. Signatures of selection detected by ROH in Akkaraman
Region	Chr	Start	Stop	Size_Mb	No_of_genes	Peak_gene	Genes
10:17753024:19307844	10	17753024	19307844	1.55482	206		, SUCLA2, MED4, ITM2B, EEF1AKMT1, GJB2, U6, 5S_rRNA, SNORA70
10:19487259:19602322	10	19487259	19602322	0.115063	206		, SUCLA2, MED4, ITM2B, EEF1AKMT1, GJB2, U6, 5S_rRNA, SNORA70
10:19745366:21027260	10	19745366	21027260	1.28189	206		, SUCLA2, MED4, ITM2B, EEF1AKMT1, GJB2, U6, 5S_rRNA, SNORA70
10:2537496:2537496	10	2537496	2537496	0	206		, SUCLA2, MED4, ITM2B, EEF1AKMT1, GJB2, U6, 5S_rRNA, SNORA70
10:25966421:27333717	10	25966421	27333717	1.3673	206		, SUCLA2, MED4, ITM2B, EEF1AKMT1, GJB2, U6, 5S_rRNA, SNORA70
10:29274817:29274817	10	29274817	29274817	0	206		, SUCLA2, MED4, ITM2B, EEF1AKMT1, GJB2, U6, 5S_rRNA, SNORA70
10:29389967:29389967	10	29389967	29389967	0	206		, SUCLA2, MED4, ITM2B, EEF1AKMT1, GJB2, U6, 5S_rRNA, SNORA70
10:30003563:30038002	10	30003563	30038002	0.034439	206		, SUCLA2, MED4, ITM2B, EEF1AKMT1, GJB2, U6, 5S_rRNA, SNORA70
10:30177658:31500510	10	30177658	31500510	1.32285	206		, SUCLA2, MED4, ITM2B, EEF1AKMT1, GJB2, U6, 5S_rRNA, SNORA70
10:30744:2316163	10	30744	2316163	2.28542	206		, SUCLA2, MED4, ITM2B, EEF1AKMT1, GJB2, U6, 5S_rRNA, SNORA70
10:32470810:32470810	10	32470810	32470810	0	206		, SUCLA2, MED4, ITM2B, EEF1AKMT1, GJB2, U6, 5S_rRNA, SNORA70
10:32619873:33680432	10	32619873	33680432	1.06056	206		, SUCLA2, MED4, ITM2B, EEF1AKMT1, GJB2, U6, 5S_rRNA, SNORA70
10:3385114:3635864	10	3385114	3635864	0.25075	206		, SUCLA2, MED4, ITM2B, EEF1AKMT1, GJB2, U6, 5S_rRNA, SNORA70
10:35950338:40800070	10	35950338	40800070	4.84973	206		, SUCLA2, MED4, ITM2B, EEF1AKMT1, GJB2, U6, 5S_rRNA, SNORA70
10:3877511:8070343	10	3877511	8070343	4.19283	206		, SUCLA2, MED4, ITM2B, EEF1AKMT1, GJB2, U6, 5S_rRNA, SNORA70
10:40901234:41227146	10	40901234	41227146	0.325912	206		, SUCLA2, MED4, ITM2B, EEF1AKMT1, GJB2, U6, 5S_rRNA, SNORA70
10:41435807:46145399	10	41435807	46145399	4.70959	206		, SUCLA2, MED4, ITM2B, EEF1AKMT1, GJB2, U6, 5S_rRNA, SNORA70
10:53442918:55039353	10	53442918	55039353	1.59644	206		, SUCLA2, MED4, ITM2B, EEF1AKMT1, GJB2, U6, 5S_rRNA, SNORA70
10:58240111:58335828	10	58240111	58335828	0.095717	206		, SUCLA2, MED4, ITM2B, EEF1AKMT1, GJB2, U6, 5S_rRNA, SNORA70
10:58569131:60388029	10	58569131	60388029	1.8189	206		, SUCLA2, MED4, ITM2B, EEF1AKMT1, GJB2, U6, 5S_rRNA, SNORA70
10:61003961:61154676	10	61003961	61154676	0.150715	206		, SUCLA2, MED4, ITM2B, EEF1AKMT1, GJB2, U6, 5S_rRNA, SNORA70
10:63476852:64362095	10	63476852	64362095	0.885243	206		, SUCLA2, MED4, ITM2B, EEF1AKMT1, GJB2, U6, 5S_rRNA, SNORA70
10:66839954:67785217	10	66839954	67785217	0.945263	206		, SUCLA2, MED4, ITM2B, EEF1AKMT1, GJB2, U6, 5S_rRNA, SNORA70
10:69836329:70680950	10	69836329	70680950	0.844621	206		, SUCLA2, MED4, ITM2B, EEF1AKMT1, GJB2, U6, 5S_rRNA, SNORA70
10:71465931:72636455	10	71465931	72636455	1.17052	206		, SUCLA2, MED4, ITM2B, EEF1AKMT1, GJB2, U6, 5S_rRNA, SNORA70
10:81773098:82786935	10	81773098	82786935	1.01384	206		, SUCLA2, MED4, ITM2B, EEF1AKMT1, GJB2, U6, 5S_rRNA, SNORA70
10:86748231:88038783	10	86748231	88038783	1.29055	206		, SUCLA2, MED4, ITM2B, EEF1AKMT1, GJB2, U6, 5S_rRNA, SNORA70
11:14996372:15763324	11	14996372	15763324	0.766952	555		, STAT5A, TXNDC17, TIMP2, RPL23A, UBB, CYGB, AANAT, SLC25A19, ATP5PD, SERPINF1, RPA1, KRT35, ACLY, SHMT1, SNORA70, U6, U2, SNORD42, 5S_rRNA, U4, SNORA62, U8, Y_RNA
11:15857477:15857477	11	15857477	15857477	0	555		, STAT5A, TXNDC17, TIMP2, RPL23A, UBB, CYGB, AANAT, SLC25A19, ATP5PD, SERPINF1, RPA1, KRT35, ACLY, SHMT1, SNORA70, U6, U2, SNORD42, 5S_rRNA, U4, SNORA62, U8, Y_RNA
11:18077431:19800229	11	18077431	19800229	1.7228	555		, STAT5A, TXNDC17, TIMP2, RPL23A, UBB, CYGB, AANAT, SLC25A19, ATP5PD, SERPINF1, RPA1, KRT35, ACLY, SHMT1, SNORA70, U6, U2, SNORD42, 5S_rRNA, U4, SNORA62, U8, Y_RNA
11:21634429:21751386	11	21634429	21751386	0.116957	555		, STAT5A, TXNDC17, TIMP2, RPL23A, UBB, CYGB, AANAT, SLC25A19, ATP5PD, SERPINF1, RPA1, KRT35, ACLY, SHMT1, SNORA70, U6, U2, SNORD42, 5S_rRNA, U4, SNORA62, U8, Y_RNA
11:21876832:22815922	11	21876832	22815922	0.93909	555		, STAT5A, TXNDC17, TIMP2, RPL23A, UBB, CYGB, AANAT, SLC25A19, ATP5PD, SERPINF1, RPA1, KRT35, ACLY, SHMT1, SNORA70, U6, U2, SNORD42, 5S_rRNA, U4, SNORA62, U8, Y_RNA
11:22970305:22970305	11	22970305	22970305	0	555		, STAT5A, TXNDC17, TIMP2, RPL23A, UBB, CYGB, AANAT, SLC25A19, ATP5PD, SERPINF1, RPA1, KRT35, ACLY, SHMT1, SNORA70, U6, U2, SNORD42, 5S_rRNA, U4, SNORA62, U8, Y_RNA
11:23627444:24877398	11	23627444	24877398	1.24995	555		, STAT5A, TXNDC17, TIMP2, RPL23A, UBB, CYGB, AANAT, SLC25A19, ATP5PD, SERPINF1, RPA1, KRT35, ACLY, SHMT1, SNORA70, U6, U2, SNORD42, 5S_rRNA, U4, SNORA62, U8, Y_RNA
11:27412690:29352633	11	27412690	29352633	1.93994	555		, STAT5A, TXNDC17, TIMP2, RPL23A, UBB, CYGB, AANAT, SLC25A19, ATP5PD, SERPINF1, RPA1, KRT35, ACLY, SHMT1, SNORA70, U6, U2, SNORD42, 5S_rRNA, U4, SNORA62, U8, Y_RNA
11:32693010:34881190	11	32693010	34881190	2.18818	555		, STAT5A, TXNDC17, TIMP2, RPL23A, UBB, CYGB, AANAT, SLC25A19, ATP5PD, SERPINF1, RPA1, KRT35, ACLY, SHMT1, SNORA70, U6, U2, SNORD42, 5S_rRNA, U4, SNORA62, U8, Y_RNA
11:41238186:41816861	11	41238186	41816861	0.578675	555		, STAT5A, TXNDC17, TIMP2, RPL23A, UBB, CYGB, AANAT, SLC25A19, ATP5PD, SERPINF1, RPA1, KRT35, ACLY, SHMT1, SNORA70, U6, U2, SNORD42, 5S_rRNA, U4, SNORA62, U8, Y_RNA
11:42581676:42706416	11	42581676	42706416	0.12474	555		, STAT5A, TXNDC17, TIMP2, RPL23A, UBB, CYGB, AANAT, SLC25A19, ATP5PD, SERPINF1, RPA1, KRT35, ACLY, SHMT1, SNORA70, U6, U2, SNORD42, 5S_rRNA, U4, SNORA62, U8, Y_RNA
11:42876219:43737226	11	42876219	43737226	0.861007	555		, STAT5A, TXNDC17, TIMP2, RPL23A, UBB, CYGB, AANAT, SLC25A19, ATP5PD, SERPINF1, RPA1, KRT35, ACLY, SHMT1, SNORA70, U6, U2, SNORD42, 5S_rRNA, U4, SNORA62, U8, Y_RNA
11:46147355:47020039	11	46147355	47020039	0.872684	555		, STAT5A, TXNDC17, TIMP2, RPL23A, UBB, CYGB, AANAT, SLC25A19, ATP5PD, SERPINF1, RPA1, KRT35, ACLY, SHMT1, SNORA70, U6, U2, SNORD42, 5S_rRNA, U4, SNORA62, U8, Y_RNA
11:47749867:49461492	11	47749867	49461492	1.71162	555		, STAT5A, TXNDC17, TIMP2, RPL23A, UBB, CYGB, AANAT, SLC25A19, ATP5PD, SERPINF1, RPA1, KRT35, ACLY, SHMT1, SNORA70, U6, U2, SNORD42, 5S_rRNA, U4, SNORA62, U8, Y_RNA
11:51856858:55495111	11	51856858	55495111	3.63825	555		, STAT5A, TXNDC17, TIMP2, RPL23A, UBB, CYGB, AANAT, SLC25A19, ATP5PD, SERPINF1, RPA1, KRT35, ACLY, SHMT1, SNORA70, U6, U2, SNORD42, 5S_rRNA, U4, SNORA62, U8, Y_RNA
11:65471307:65471307	11	65471307	65471307	0	555		, STAT5A, TXNDC17, TIMP2, RPL23A, UBB, CYGB, AANAT, SLC25A19, ATP5PD, SERPINF1, RPA1, KRT35, ACLY, SHMT1, SNORA70, U6, U2, SNORD42, 5S_rRNA, U4, SNORA62, U8, Y_RNA
11:6835137:6835137	11	6835137	6835137	0	555		, STAT5A, TXNDC17, TIMP2, RPL23A, UBB, CYGB, AANAT, SLC25A19, ATP5PD, SERPINF1, RPA1, KRT35, ACLY, SHMT1, SNORA70, U6, U2, SNORD42, 5S_rRNA, U4, SNORA62, U8, Y_RNA
11:694267:3144751	11	694267	3144751	2.45048	555		, STAT5A, TXNDC17, TIMP2, RPL23A, UBB, CYGB, AANAT, SLC25A19, ATP5PD, SERPINF1, RPA1, KRT35, ACLY, SHMT1, SNORA70, U6, U2, SNORD42, 5S_rRNA, U4, SNORA62, U8, Y_RNA
11:7879331:7879331	11	7879331	7879331	0	555		, STAT5A, TXNDC17, TIMP2, RPL23A, UBB, CYGB, AANAT, SLC25A19, ATP5PD, SERPINF1, RPA1, KRT35, ACLY, SHMT1, SNORA70, U6, U2, SNORD42, 5S_rRNA, U4, SNORA62, U8, Y_RNA
12:11997076:13003349	12	11997076	13003349	1.00627	144		, TLR5, PGD, CAPN2, 5S_rRNA, U6, CORT
12:14787771:15054593	12	14787771	15054593	0.266822	144		, TLR5, PGD, CAPN2, 5S_rRNA, U6, CORT
12:15262147:15591916	12	15262147	15591916	0.329769	144		, TLR5, PGD, CAPN2, 5S_rRNA, U6, CORT
12:23499150:25246506	12	23499150	25246506	1.74736	144		, TLR5, PGD, CAPN2, 5S_rRNA, U6, CORT
12:41067215:41761078	12	41067215	41761078	0.693863	144		, TLR5, PGD, CAPN2, 5S_rRNA, U6, CORT
12:43688342:43845820	12	43688342	43845820	0.157478	144		, TLR5, PGD, CAPN2, 5S_rRNA, U6, CORT
12:44060726:44060726	12	44060726	44060726	0	144		, TLR5, PGD, CAPN2, 5S_rRNA, U6, CORT
12:44952656:45976053	12	44952656	45976053	1.0234	144		, TLR5, PGD, CAPN2, 5S_rRNA, U6, CORT
12:46915685:48533011	12	46915685	48533011	1.61733	144		, TLR5, PGD, CAPN2, 5S_rRNA, U6, CORT
12:58655930:60547567	12	58655930	60547567	1.89164	144		, TLR5, PGD, CAPN2, 5S_rRNA, U6, CORT
12:64734070:64858268	12	64734070	64858268	0.124198	144		, TLR5, PGD, CAPN2, 5S_rRNA, U6, CORT
12:68765841:68810185	12	68765841	68810185	0.044344	144		, TLR5, PGD, CAPN2, 5S_rRNA, U6, CORT
12:78230281:78687219	12	78230281	78687219	0.456938	144		, TLR5, PGD, CAPN2, 5S_rRNA, U6, CORT
12:82510991:82846933	12	82510991	82846933	0.335942	144		, TLR5, PGD, CAPN2, 5S_rRNA, U6, CORT
12:8897979:8994520	12	8897979	8994520	0.096541	144		, TLR5, PGD, CAPN2, 5S_rRNA, U6, CORT
12:9064663:9119089	12	9064663	9119089	0.054426	144		, TLR5, PGD, CAPN2, 5S_rRNA, U6, CORT
13:12951837:13343880	13	12951837	13343880	0.392043	358		, BCL2L1, OXT, PRNP, PRND, CD93, PYGB, PDYN, GDI2, RSU1, ASIP, ZGPAT, ARFRP1, ITGB1, AURKA, ADIG, U6, SNORD31, SNORA73, 5S_rRNA, oar-mir-133, PRNT
13:18055936:19577291	13	18055936	19577291	1.52136	358		, BCL2L1, OXT, PRNP, PRND, CD93, PYGB, PDYN, GDI2, RSU1, ASIP, ZGPAT, ARFRP1, ITGB1, AURKA, ADIG, U6, SNORD31, SNORA73, 5S_rRNA, oar-mir-133, PRNT
13:21120367:22413944	13	21120367	22413944	1.29358	358		, BCL2L1, OXT, PRNP, PRND, CD93, PYGB, PDYN, GDI2, RSU1, ASIP, ZGPAT, ARFRP1, ITGB1, AURKA, ADIG, U6, SNORD31, SNORA73, 5S_rRNA, oar-mir-133, PRNT
13:30121681:30121681	13	30121681	30121681	0	358		, BCL2L1, OXT, PRNP, PRND, CD93, PYGB, PDYN, GDI2, RSU1, ASIP, ZGPAT, ARFRP1, ITGB1, AURKA, ADIG, U6, SNORD31, SNORA73, 5S_rRNA, oar-mir-133, PRNT
13:32449205:33557008	13	32449205	33557008	1.1078	358		, BCL2L1, OXT, PRNP, PRND, CD93, PYGB, PDYN, GDI2, RSU1, ASIP, ZGPAT, ARFRP1, ITGB1, AURKA, ADIG, U6, SNORD31, SNORA73, 5S_rRNA, oar-mir-133, PRNT
13:33660454:33691294	13	33660454	33691294	0.03084	358		, BCL2L1, OXT, PRNP, PRND, CD93, PYGB, PDYN, GDI2, RSU1, ASIP, ZGPAT, ARFRP1, ITGB1, AURKA, ADIG, U6, SNORD31, SNORA73, 5S_rRNA, oar-mir-133, PRNT
13:40166649:41662134	13	40166649	41662134	1.49548	358		, BCL2L1, OXT, PRNP, PRND, CD93, PYGB, PDYN, GDI2, RSU1, ASIP, ZGPAT, ARFRP1, ITGB1, AURKA, ADIG, U6, SNORD31, SNORA73, 5S_rRNA, oar-mir-133, PRNT
13:41763165:43465637	13	41763165	43465637	1.70247	358		, BCL2L1, OXT, PRNP, PRND, CD93, PYGB, PDYN, GDI2, RSU1, ASIP, ZGPAT, ARFRP1, ITGB1, AURKA, ADIG, U6, SNORD31, SNORA73, 5S_rRNA, oar-mir-133, PRNT
13:45484042:46672964	13	45484042	46672964	1.18892	358		, BCL2L1, OXT, PRNP, PRND, CD93, PYGB, PDYN, GDI2, RSU1, ASIP, ZGPAT, ARFRP1, ITGB1, AURKA, ADIG, U6, SNORD31, SNORA73, 5S_rRNA, oar-mir-133, PRNT
13:48640188:50088739	13	48640188	50088739	1.44855	358		, BCL2L1, OXT, PRNP, PRND, CD93, PYGB, PDYN, GDI2, RSU1, ASIP, ZGPAT, ARFRP1, ITGB1, AURKA, ADIG, U6, SNORD31, SNORA73, 5S_rRNA, oar-mir-133, PRNT
13:51311649:54016379	13	51311649	54016379	2.70473	358		, BCL2L1, OXT, PRNP, PRND, CD93, PYGB, PDYN, GDI2, RSU1, ASIP, ZGPAT, ARFRP1, ITGB1, AURKA, ADIG, U6, SNORD31, SNORA73, 5S_rRNA, oar-mir-133, PRNT
13:54859395:56512839	13	54859395	56512839	1.65344	358		, BCL2L1, OXT, PRNP, PRND, CD93, PYGB, PDYN, GDI2, RSU1, ASIP, ZGPAT, ARFRP1, ITGB1, AURKA, ADIG, U6, SNORD31, SNORA73, 5S_rRNA, oar-mir-133, PRNT
13:56944143:58836661	13	56944143	58836661	1.89252	358		, BCL2L1, OXT, PRNP, PRND, CD93, PYGB, PDYN, GDI2, RSU1, ASIP, ZGPAT, ARFRP1, ITGB1, AURKA, ADIG, U6, SNORD31, SNORA73, 5S_rRNA, oar-mir-133, PRNT
13:60542240:62894028	13	60542240	62894028	2.35179	358		, BCL2L1, OXT, PRNP, PRND, CD93, PYGB, PDYN, GDI2, RSU1, ASIP, ZGPAT, ARFRP1, ITGB1, AURKA, ADIG, U6, SNORD31, SNORA73, 5S_rRNA, oar-mir-133, PRNT
13:62949442:63071015	13	62949442	63071015	0.121573	358		, BCL2L1, OXT, PRNP, PRND, CD93, PYGB, PDYN, GDI2, RSU1, ASIP, ZGPAT, ARFRP1, ITGB1, AURKA, ADIG, U6, SNORD31, SNORA73, 5S_rRNA, oar-mir-133, PRNT
13:63161846:63592485	13	63161846	63592485	0.430639	358		, BCL2L1, OXT, PRNP, PRND, CD93, PYGB, PDYN, GDI2, RSU1, ASIP, ZGPAT, ARFRP1, ITGB1, AURKA, ADIG, U6, SNORD31, SNORA73, 5S_rRNA, oar-mir-133, PRNT
13:64272418:64272418	13	64272418	64272418	0	358		, BCL2L1, OXT, PRNP, PRND, CD93, PYGB, PDYN, GDI2, RSU1, ASIP, ZGPAT, ARFRP1, ITGB1, AURKA, ADIG, U6, SNORD31, SNORA73, 5S_rRNA, oar-mir-133, PRNT
13:64796296:64997000	13	64796296	64997000	0.200704	358		, BCL2L1, OXT, PRNP, PRND, CD93, PYGB, PDYN, GDI2, RSU1, ASIP, ZGPAT, ARFRP1, ITGB1, AURKA, ADIG, U6, SNORD31, SNORA73, 5S_rRNA, oar-mir-133, PRNT
13:67067820:67246527	13	67067820	67246527	0.178707	358		, BCL2L1, OXT, PRNP, PRND, CD93, PYGB, PDYN, GDI2, RSU1, ASIP, ZGPAT, ARFRP1, ITGB1, AURKA, ADIG, U6, SNORD31, SNORA73, 5S_rRNA, oar-mir-133, PRNT
13:67997490:68913658	13	67997490	68913658	0.916168	358		, BCL2L1, OXT, PRNP, PRND, CD93, PYGB, PDYN, GDI2, RSU1, ASIP, ZGPAT, ARFRP1, ITGB1, AURKA, ADIG, U6, SNORD31, SNORA73, 5S_rRNA, oar-mir-133, PRNT
13:87964841:88166227	13	87964841	88166227	0.201386	358		, BCL2L1, OXT, PRNP, PRND, CD93, PYGB, PDYN, GDI2, RSU1, ASIP, ZGPAT, ARFRP1, ITGB1, AURKA, ADIG, U6, SNORD31, SNORA73, 5S_rRNA, oar-mir-133, PRNT
13:9788020:10356156	13	9788020	10356156	0.568136	358		, BCL2L1, OXT, PRNP, PRND, CD93, PYGB, PDYN, GDI2, RSU1, ASIP, ZGPAT, ARFRP1, ITGB1, AURKA, ADIG, U6, SNORD31, SNORA73, 5S_rRNA, oar-mir-133, PRNT
14:10669094:11726417	14	10669094	11726417	1.05732	394		, CIAPIN1, BCO1, PLAUR, HSD17B2, ZDHHC7, FTO, ARL2BP, 7SK, 5S_rRNA, U6, SNORA70
14:12987715:16972366	14	12987715	16972366	3.98465	394		, CIAPIN1, BCO1, PLAUR, HSD17B2, ZDHHC7, FTO, ARL2BP, 7SK, 5S_rRNA, U6, SNORA70
14:18321369:18652916	14	18321369	18652916	0.331547	394		, CIAPIN1, BCO1, PLAUR, HSD17B2, ZDHHC7, FTO, ARL2BP, 7SK, 5S_rRNA, U6, SNORA70
14:18969699:19525237	14	18969699	19525237	0.555538	394		, CIAPIN1, BCO1, PLAUR, HSD17B2, ZDHHC7, FTO, ARL2BP, 7SK, 5S_rRNA, U6, SNORA70
14:21661246:21938473	14	21661246	21938473	0.277227	394		, CIAPIN1, BCO1, PLAUR, HSD17B2, ZDHHC7, FTO, ARL2BP, 7SK, 5S_rRNA, U6, SNORA70
14:24191061:26075495	14	24191061	26075495	1.88443	394		, CIAPIN1, BCO1, PLAUR, HSD17B2, ZDHHC7, FTO, ARL2BP, 7SK, 5S_rRNA, U6, SNORA70
14:2622035:2852673	14	2622035	2852673	0.230638	394		, CIAPIN1, BCO1, PLAUR, HSD17B2, ZDHHC7, FTO, ARL2BP, 7SK, 5S_rRNA, U6, SNORA70
14:2924168:3404872	14	2924168	3404872	0.480704	394		, CIAPIN1, BCO1, PLAUR, HSD17B2, ZDHHC7, FTO, ARL2BP, 7SK, 5S_rRNA, U6, SNORA70
14:29632219:30336499	14	29632219	30336499	0.70428	394		, CIAPIN1, BCO1, PLAUR, HSD17B2, ZDHHC7, FTO, ARL2BP, 7SK, 5S_rRNA, U6, SNORA70
14:31736852:31736852	14	31736852	31736852	0	394		, CIAPIN1, BCO1, PLAUR, HSD17B2, ZDHHC7, FTO, ARL2BP, 7SK, 5S_rRNA, U6, SNORA70
14:35183176:38063222	14	35183176	38063222	2.88005	394		, CIAPIN1, BCO1, PLAUR, HSD17B2, ZDHHC7, FTO, ARL2BP, 7SK, 5S_rRNA, U6, SNORA70
14:50822549:51670608	14	50822549	51670608	0.848059	394		, CIAPIN1, BCO1, PLAUR, HSD17B2, ZDHHC7, FTO, ARL2BP, 7SK, 5S_rRNA, U6, SNORA70
14:51950315:53417983	14	51950315	53417983	1.46767	394		, CIAPIN1, BCO1, PLAUR, HSD17B2, ZDHHC7, FTO, ARL2BP, 7SK, 5S_rRNA, U6, SNORA70
14:5507900:8748163	14	5507900	8748163	3.24026	394		, CIAPIN1, BCO1, PLAUR, HSD17B2, ZDHHC7, FTO, ARL2BP, 7SK, 5S_rRNA, U6, SNORA70
14:60364911:60399366	14	60364911	60399366	0.034455	394		, CIAPIN1, BCO1, PLAUR, HSD17B2, ZDHHC7, FTO, ARL2BP, 7SK, 5S_rRNA, U6, SNORA70
14:60399831:62349452	14	60399831	62349452	1.94962	394		, CIAPIN1, BCO1, PLAUR, HSD17B2, ZDHHC7, FTO, ARL2BP, 7SK, 5S_rRNA, U6, SNORA70
15:10050948:12128190	15	10050948	12128190	2.07724	303		, FSHB, EIF3M, U6, 5S_rRNA, 7SK, U1
15:1131166:3892898	15	1131166	3892898	2.76173	303		, FSHB, EIF3M, U6, 5S_rRNA, 7SK, U1
15:17003269:18372856	15	17003269	18372856	1.36959	303		, FSHB, EIF3M, U6, 5S_rRNA, 7SK, U1
15:18440393:18589382	15	18440393	18589382	0.148989	303		, FSHB, EIF3M, U6, 5S_rRNA, 7SK, U1
15:30061579:30061579	15	30061579	30061579	0	303		, FSHB, EIF3M, U6, 5S_rRNA, 7SK, U1
15:30217526:31289860	15	30217526	31289860	1.07233	303		, FSHB, EIF3M, U6, 5S_rRNA, 7SK, U1
15:31616151:31616151	15	31616151	31616151	0	303		, FSHB, EIF3M, U6, 5S_rRNA, 7SK, U1
15:41026393:42373623	15	41026393	42373623	1.34723	303		, FSHB, EIF3M, U6, 5S_rRNA, 7SK, U1
15:43565431:44913711	15	43565431	44913711	1.34828	303		, FSHB, EIF3M, U6, 5S_rRNA, 7SK, U1
15:47387694:50395939	15	47387694	50395939	3.00825	303		, FSHB, EIF3M, U6, 5S_rRNA, 7SK, U1
15:53218121:54889320	15	53218121	54889320	1.6712	303		, FSHB, EIF3M, U6, 5S_rRNA, 7SK, U1
15:55225838:59871543	15	55225838	59871543	4.64571	303		, FSHB, EIF3M, U6, 5S_rRNA, 7SK, U1
15:61509644:62145839	15	61509644	62145839	0.636195	303		, FSHB, EIF3M, U6, 5S_rRNA, 7SK, U1
15:65355875:66221386	15	65355875	66221386	0.865511	303		, FSHB, EIF3M, U6, 5S_rRNA, 7SK, U1
15:66522206:66575406	15	66522206	66575406	0.0532	303		, FSHB, EIF3M, U6, 5S_rRNA, 7SK, U1
15:66653722:66653722	15	66653722	66653722	0	303		, FSHB, EIF3M, U6, 5S_rRNA, 7SK, U1
15:66951063:67212591	15	66951063	67212591	0.261528	303		, FSHB, EIF3M, U6, 5S_rRNA, 7SK, U1
15:73314365:73610660	15	73314365	73610660	0.296295	303		, FSHB, EIF3M, U6, 5S_rRNA, 7SK, U1
15:78142458:79255066	15	78142458	79255066	1.11261	303		, FSHB, EIF3M, U6, 5S_rRNA, 7SK, U1
15:81307924:83001324	15	81307924	83001324	1.6934	303		, FSHB, EIF3M, U6, 5S_rRNA, 7SK, U1
16:11351777:11855907	16	11351777	11855907	0.50413	117		, FST, 5S_rRNA, U6, U2, SNORA70, U4
16:14425857:15458830	16	14425857	15458830	1.03297	117		, FST, 5S_rRNA, U6, U2, SNORA70, U4
16:2206033:3827072	16	2206033	3827072	1.62104	117		, FST, 5S_rRNA, U6, U2, SNORA70, U4
16:23475789:24453442	16	23475789	24453442	0.977653	117		, FST, 5S_rRNA, U6, U2, SNORA70, U4
16:25734534:26276117	16	25734534	26276117	0.541583	117		, FST, 5S_rRNA, U6, U2, SNORA70, U4
16:26341197:26616332	16	26341197	26616332	0.275135	117		, FST, 5S_rRNA, U6, U2, SNORA70, U4
16:34474012:35827948	16	34474012	35827948	1.35394	117		, FST, 5S_rRNA, U6, U2, SNORA70, U4
16:41617317:41863011	16	41617317	41863011	0.245694	117		, FST, 5S_rRNA, U6, U2, SNORA70, U4
16:44680056:46198213	16	44680056	46198213	1.51816	117		, FST, 5S_rRNA, U6, U2, SNORA70, U4
16:46888883:48038710	16	46888883	48038710	1.14983	117		, FST, 5S_rRNA, U6, U2, SNORA70, U4
16:48823241:50214709	16	48823241	50214709	1.39147	117		, FST, 5S_rRNA, U6, U2, SNORA70, U4
16:50730450:54844169	16	50730450	54844169	4.11372	117		, FST, 5S_rRNA, U6, U2, SNORA70, U4
16:59571521:59809959	16	59571521	59809959	0.238438	117		, FST, 5S_rRNA, U6, U2, SNORA70, U4
16:60117902:60170415	16	60117902	60170415	0.052513	117		, FST, 5S_rRNA, U6, U2, SNORA70, U4
16:63260454:63721916	16	63260454	63721916	0.461462	117		, FST, 5S_rRNA, U6, U2, SNORA70, U4
16:63823647:63837555	16	63823647	63837555	0.013908	117		, FST, 5S_rRNA, U6, U2, SNORA70, U4
16:64068901:66762716	16	64068901	66762716	2.69381	117		, FST, 5S_rRNA, U6, U2, SNORA70, U4
16:66937416:67024626	16	66937416	67024626	0.08721	117		, FST, 5S_rRNA, U6, U2, SNORA70, U4
16:75371327:75650867	16	75371327	75650867	0.27954	117		, FST, 5S_rRNA, U6, U2, SNORA70, U4
17:12341526:12341526	17	12341526	12341526	0	332		, SFRP2, RAB21, TDO2, ERP29, IL15, PUS1, SLC7A11, RNF34, TLR2, MYL2, CRYBB3, Metazoa_SRP, U6, SNORA70, 5S_rRNA, 7SK, U4, SNORA72, U2, U1
17:14184902:15927320	17	14184902	15927320	1.74242	332		, SFRP2, RAB21, TDO2, ERP29, IL15, PUS1, SLC7A11, RNF34, TLR2, MYL2, CRYBB3, Metazoa_SRP, U6, SNORA70, 5S_rRNA, 7SK, U4, SNORA72, U2, U1
17:19234983:19415299	17	19234983	19415299	0.180316	332		, SFRP2, RAB21, TDO2, ERP29, IL15, PUS1, SLC7A11, RNF34, TLR2, MYL2, CRYBB3, Metazoa_SRP, U6, SNORA70, 5S_rRNA, 7SK, U4, SNORA72, U2, U1
17:19602496:21289839	17	19602496	21289839	1.68734	332		, SFRP2, RAB21, TDO2, ERP29, IL15, PUS1, SLC7A11, RNF34, TLR2, MYL2, CRYBB3, Metazoa_SRP, U6, SNORA70, 5S_rRNA, 7SK, U4, SNORA72, U2, U1
17:26195005:27320913	17	26195005	27320913	1.12591	332		, SFRP2, RAB21, TDO2, ERP29, IL15, PUS1, SLC7A11, RNF34, TLR2, MYL2, CRYBB3, Metazoa_SRP, U6, SNORA70, 5S_rRNA, 7SK, U4, SNORA72, U2, U1
17:31561091:32895559	17	31561091	32895559	1.33447	332		, SFRP2, RAB21, TDO2, ERP29, IL15, PUS1, SLC7A11, RNF34, TLR2, MYL2, CRYBB3, Metazoa_SRP, U6, SNORA70, 5S_rRNA, 7SK, U4, SNORA72, U2, U1
17:3257039:3257039	17	3257039	3257039	0	332		, SFRP2, RAB21, TDO2, ERP29, IL15, PUS1, SLC7A11, RNF34, TLR2, MYL2, CRYBB3, Metazoa_SRP, U6, SNORA70, 5S_rRNA, 7SK, U4, SNORA72, U2, U1
17:3372466:4540971	17	3372466	4540971	1.1685	332		, SFRP2, RAB21, TDO2, ERP29, IL15, PUS1, SLC7A11, RNF34, TLR2, MYL2, CRYBB3, Metazoa_SRP, U6, SNORA70, 5S_rRNA, 7SK, U4, SNORA72, U2, U1
17:35667529:36055213	17	35667529	36055213	0.387684	332		, SFRP2, RAB21, TDO2, ERP29, IL15, PUS1, SLC7A11, RNF34, TLR2, MYL2, CRYBB3, Metazoa_SRP, U6, SNORA70, 5S_rRNA, 7SK, U4, SNORA72, U2, U1
17:36058:1348956	17	36058	1348956	1.3129	332		, SFRP2, RAB21, TDO2, ERP29, IL15, PUS1, SLC7A11, RNF34, TLR2, MYL2, CRYBB3, Metazoa_SRP, U6, SNORA70, 5S_rRNA, 7SK, U4, SNORA72, U2, U1
17:36435979:38506788	17	36435979	38506788	2.07081	332		, SFRP2, RAB21, TDO2, ERP29, IL15, PUS1, SLC7A11, RNF34, TLR2, MYL2, CRYBB3, Metazoa_SRP, U6, SNORA70, 5S_rRNA, 7SK, U4, SNORA72, U2, U1
17:38599721:38628942	17	38599721	38628942	0.029221	332		, SFRP2, RAB21, TDO2, ERP29, IL15, PUS1, SLC7A11, RNF34, TLR2, MYL2, CRYBB3, Metazoa_SRP, U6, SNORA70, 5S_rRNA, 7SK, U4, SNORA72, U2, U1
17:39324266:41915634	17	39324266	41915634	2.59137	332		, SFRP2, RAB21, TDO2, ERP29, IL15, PUS1, SLC7A11, RNF34, TLR2, MYL2, CRYBB3, Metazoa_SRP, U6, SNORA70, 5S_rRNA, 7SK, U4, SNORA72, U2, U1
17:42935623:43551131	17	42935623	43551131	0.615508	332		, SFRP2, RAB21, TDO2, ERP29, IL15, PUS1, SLC7A11, RNF34, TLR2, MYL2, CRYBB3, Metazoa_SRP, U6, SNORA70, 5S_rRNA, 7SK, U4, SNORA72, U2, U1
17:44741554:45572032	17	44741554	45572032	0.830478	332		, SFRP2, RAB21, TDO2, ERP29, IL15, PUS1, SLC7A11, RNF34, TLR2, MYL2, CRYBB3, Metazoa_SRP, U6, SNORA70, 5S_rRNA, 7SK, U4, SNORA72, U2, U1
17:47158970:49990800	17	47158970	49990800	2.83183	332		, SFRP2, RAB21, TDO2, ERP29, IL15, PUS1, SLC7A11, RNF34, TLR2, MYL2, CRYBB3, Metazoa_SRP, U6, SNORA70, 5S_rRNA, 7SK, U4, SNORA72, U2, U1
17:50271410:50271410	17	50271410	50271410	0	332		, SFRP2, RAB21, TDO2, ERP29, IL15, PUS1, SLC7A11, RNF34, TLR2, MYL2, CRYBB3, Metazoa_SRP, U6, SNORA70, 5S_rRNA, 7SK, U4, SNORA72, U2, U1
17:50416505:52473999	17	50416505	52473999	2.05749	332		, SFRP2, RAB21, TDO2, ERP29, IL15, PUS1, SLC7A11, RNF34, TLR2, MYL2, CRYBB3, Metazoa_SRP, U6, SNORA70, 5S_rRNA, 7SK, U4, SNORA72, U2, U1
17:53440227:53756207	17	53440227	53756207	0.31598	332		, SFRP2, RAB21, TDO2, ERP29, IL15, PUS1, SLC7A11, RNF34, TLR2, MYL2, CRYBB3, Metazoa_SRP, U6, SNORA70, 5S_rRNA, 7SK, U4, SNORA72, U2, U1
17:54045405:54310669	17	54045405	54310669	0.265264	332		, SFRP2, RAB21, TDO2, ERP29, IL15, PUS1, SLC7A11, RNF34, TLR2, MYL2, CRYBB3, Metazoa_SRP, U6, SNORA70, 5S_rRNA, 7SK, U4, SNORA72, U2, U1
17:54634231:56208162	17	54634231	56208162	1.57393	332		, SFRP2, RAB21, TDO2, ERP29, IL15, PUS1, SLC7A11, RNF34, TLR2, MYL2, CRYBB3, Metazoa_SRP, U6, SNORA70, 5S_rRNA, 7SK, U4, SNORA72, U2, U1
17:56274806:59274503	17	56274806	59274503	2.9997	332		, SFRP2, RAB21, TDO2, ERP29, IL15, PUS1, SLC7A11, RNF34, TLR2, MYL2, CRYBB3, Metazoa_SRP, U6, SNORA70, 5S_rRNA, 7SK, U4, SNORA72, U2, U1
17:59371317:60376810	17	59371317	60376810	1.00549	332		, SFRP2, RAB21, TDO2, ERP29, IL15, PUS1, SLC7A11, RNF34, TLR2, MYL2, CRYBB3, Metazoa_SRP, U6, SNORA70, 5S_rRNA, 7SK, U4, SNORA72, U2, U1
17:61246678:62846809	17	61246678	62846809	1.60013	332		, SFRP2, RAB21, TDO2, ERP29, IL15, PUS1, SLC7A11, RNF34, TLR2, MYL2, CRYBB3, Metazoa_SRP, U6, SNORA70, 5S_rRNA, 7SK, U4, SNORA72, U2, U1
17:62934607:62955348	17	62934607	62955348	0.020741	332		, SFRP2, RAB21, TDO2, ERP29, IL15, PUS1, SLC7A11, RNF34, TLR2, MYL2, CRYBB3, Metazoa_SRP, U6, SNORA70, 5S_rRNA, 7SK, U4, SNORA72, U2, U1
17:62995428:62999558	17	62995428	62999558	0.00413	332		, SFRP2, RAB21, TDO2, ERP29, IL15, PUS1, SLC7A11, RNF34, TLR2, MYL2, CRYBB3, Metazoa_SRP, U6, SNORA70, 5S_rRNA, 7SK, U4, SNORA72, U2, U1
17:63171334:63221835	17	63171334	63221835	0.050501	332		, SFRP2, RAB21, TDO2, ERP29, IL15, PUS1, SLC7A11, RNF34, TLR2, MYL2, CRYBB3, Metazoa_SRP, U6, SNORA70, 5S_rRNA, 7SK, U4, SNORA72, U2, U1
17:64499315:65561672	17	64499315	65561672	1.06236	332		, SFRP2, RAB21, TDO2, ERP29, IL15, PUS1, SLC7A11, RNF34, TLR2, MYL2, CRYBB3, Metazoa_SRP, U6, SNORA70, 5S_rRNA, 7SK, U4, SNORA72, U2, U1
17:65721444:65721444	17	65721444	65721444	0	332		, SFRP2, RAB21, TDO2, ERP29, IL15, PUS1, SLC7A11, RNF34, TLR2, MYL2, CRYBB3, Metazoa_SRP, U6, SNORA70, 5S_rRNA, 7SK, U4, SNORA72, U2, U1
17:65790325:68808247	17	65790325	68808247	3.01792	332		, SFRP2, RAB21, TDO2, ERP29, IL15, PUS1, SLC7A11, RNF34, TLR2, MYL2, CRYBB3, Metazoa_SRP, U6, SNORA70, 5S_rRNA, 7SK, U4, SNORA72, U2, U1
17:72551159:74297183	17	72551159	74297183	1.74602	332		, SFRP2, RAB21, TDO2, ERP29, IL15, PUS1, SLC7A11, RNF34, TLR2, MYL2, CRYBB3, Metazoa_SRP, U6, SNORA70, 5S_rRNA, 7SK, U4, SNORA72, U2, U1
17:75247043:77335345	17	75247043	77335345	2.0883	332		, SFRP2, RAB21, TDO2, ERP29, IL15, PUS1, SLC7A11, RNF34, TLR2, MYL2, CRYBB3, Metazoa_SRP, U6, SNORA70, 5S_rRNA, 7SK, U4, SNORA72, U2, U1
17:7837488:8430183	17	7837488	8430183	0.592695	332		, SFRP2, RAB21, TDO2, ERP29, IL15, PUS1, SLC7A11, RNF34, TLR2, MYL2, CRYBB3, Metazoa_SRP, U6, SNORA70, 5S_rRNA, 7SK, U4, SNORA72, U2, U1
18:12152337:12221287	18	12152337	12221287	0.06895	182		, CYP1A1, CYP11A1, MCP-3, SRP54, PSMA6, NFKBIA, SNRPA1, U6, U4, SNORA70, Vault, U1, U3, 5S_rRNA
18:12576454:13089050	18	12576454	13089050	0.512596	182		, CYP1A1, CYP11A1, MCP-3, SRP54, PSMA6, NFKBIA, SNRPA1, U6, U4, SNORA70, Vault, U1, U3, 5S_rRNA
18:21799143:23740447	18	21799143	23740447	1.9413	182		, CYP1A1, CYP11A1, MCP-3, SRP54, PSMA6, NFKBIA, SNRPA1, U6, U4, SNORA70, Vault, U1, U3, 5S_rRNA
18:27801213:29276620	18	27801213	29276620	1.47541	182		, CYP1A1, CYP11A1, MCP-3, SRP54, PSMA6, NFKBIA, SNRPA1, U6, U4, SNORA70, Vault, U1, U3, 5S_rRNA
18:31062214:33173734	18	31062214	33173734	2.11152	182		, CYP1A1, CYP11A1, MCP-3, SRP54, PSMA6, NFKBIA, SNRPA1, U6, U4, SNORA70, Vault, U1, U3, 5S_rRNA
18:33319682:35619164	18	33319682	35619164	2.29948	182		, CYP1A1, CYP11A1, MCP-3, SRP54, PSMA6, NFKBIA, SNRPA1, U6, U4, SNORA70, Vault, U1, U3, 5S_rRNA
18:37298249:37383169	18	37298249	37383169	0.08492	182		, CYP1A1, CYP11A1, MCP-3, SRP54, PSMA6, NFKBIA, SNRPA1, U6, U4, SNORA70, Vault, U1, U3, 5S_rRNA
18:39240181:39240181	18	39240181	39240181	0	182		, CYP1A1, CYP11A1, MCP-3, SRP54, PSMA6, NFKBIA, SNRPA1, U6, U4, SNORA70, Vault, U1, U3, 5S_rRNA
18:39426999:40628179	18	39426999	40628179	1.20118	182		, CYP1A1, CYP11A1, MCP-3, SRP54, PSMA6, NFKBIA, SNRPA1, U6, U4, SNORA70, Vault, U1, U3, 5S_rRNA
18:41286228:42860610	18	41286228	42860610	1.57438	182		, CYP1A1, CYP11A1, MCP-3, SRP54, PSMA6, NFKBIA, SNRPA1, U6, U4, SNORA70, Vault, U1, U3, 5S_rRNA
18:43839178:44977580	18	43839178	44977580	1.1384	182		, CYP1A1, CYP11A1, MCP-3, SRP54, PSMA6, NFKBIA, SNRPA1, U6, U4, SNORA70, Vault, U1, U3, 5S_rRNA
18:48395198:48581089	18	48395198	48581089	0.185891	182		, CYP1A1, CYP11A1, MCP-3, SRP54, PSMA6, NFKBIA, SNRPA1, U6, U4, SNORA70, Vault, U1, U3, 5S_rRNA
18:49863227:50863653	18	49863227	50863653	1.00043	182		, CYP1A1, CYP11A1, MCP-3, SRP54, PSMA6, NFKBIA, SNRPA1, U6, U4, SNORA70, Vault, U1, U3, 5S_rRNA
18:52474778:53158212	18	52474778	53158212	0.683434	182		, CYP1A1, CYP11A1, MCP-3, SRP54, PSMA6, NFKBIA, SNRPA1, U6, U4, SNORA70, Vault, U1, U3, 5S_rRNA
18:54924208:54924208	18	54924208	54924208	0	182		, CYP1A1, CYP11A1, MCP-3, SRP54, PSMA6, NFKBIA, SNRPA1, U6, U4, SNORA70, Vault, U1, U3, 5S_rRNA
18:55096780:57055930	18	55096780	57055930	1.95915	182		, CYP1A1, CYP11A1, MCP-3, SRP54, PSMA6, NFKBIA, SNRPA1, U6, U4, SNORA70, Vault, U1, U3, 5S_rRNA
18:69511583:71403193	18	69511583	71403193	1.89161	182		, CYP1A1, CYP11A1, MCP-3, SRP54, PSMA6, NFKBIA, SNRPA1, U6, U4, SNORA70, Vault, U1, U3, 5S_rRNA
19:10761451:12206109	19	10761451	12206109	1.44466	242		, MYD88, CATHL3, BAC5, SC5, ELP6, RAB7A, OXTR, LTF, CCR9, SLC25A26, ARF4, CCR3, U5, U6, 5S_rRNA, U2, U1
19:16331108:18429468	19	16331108	18429468	2.09836	242		, MYD88, CATHL3, BAC5, SC5, ELP6, RAB7A, OXTR, LTF, CCR9, SLC25A26, ARF4, CCR3, U5, U6, 5S_rRNA, U2, U1
19:33737522:33968342	19	33737522	33968342	0.23082	242		, MYD88, CATHL3, BAC5, SC5, ELP6, RAB7A, OXTR, LTF, CCR9, SLC25A26, ARF4, CCR3, U5, U6, 5S_rRNA, U2, U1
19:35121800:36299010	19	35121800	36299010	1.17721	242		, MYD88, CATHL3, BAC5, SC5, ELP6, RAB7A, OXTR, LTF, CCR9, SLC25A26, ARF4, CCR3, U5, U6, 5S_rRNA, U2, U1
19:38924140:39794927	19	38924140	39794927	0.870787	242		, MYD88, CATHL3, BAC5, SC5, ELP6, RAB7A, OXTR, LTF, CCR9, SLC25A26, ARF4, CCR3, U5, U6, 5S_rRNA, U2, U1
19:39930248:39930248	19	39930248	39930248	0	242		, MYD88, CATHL3, BAC5, SC5, ELP6, RAB7A, OXTR, LTF, CCR9, SLC25A26, ARF4, CCR3, U5, U6, 5S_rRNA, U2, U1
19:43667228:45302429	19	43667228	45302429	1.6352	242		, MYD88, CATHL3, BAC5, SC5, ELP6, RAB7A, OXTR, LTF, CCR9, SLC25A26, ARF4, CCR3, U5, U6, 5S_rRNA, U2, U1
19:45982381:46545362	19	45982381	46545362	0.562981	242		, MYD88, CATHL3, BAC5, SC5, ELP6, RAB7A, OXTR, LTF, CCR9, SLC25A26, ARF4, CCR3, U5, U6, 5S_rRNA, U2, U1
19:51269847:53101594	19	51269847	53101594	1.83175	242		, MYD88, CATHL3, BAC5, SC5, ELP6, RAB7A, OXTR, LTF, CCR9, SLC25A26, ARF4, CCR3, U5, U6, 5S_rRNA, U2, U1
19:53209480:53447807	19	53209480	53447807	0.238327	242		, MYD88, CATHL3, BAC5, SC5, ELP6, RAB7A, OXTR, LTF, CCR9, SLC25A26, ARF4, CCR3, U5, U6, 5S_rRNA, U2, U1
19:53562745:55335001	19	53562745	55335001	1.77226	242		, MYD88, CATHL3, BAC5, SC5, ELP6, RAB7A, OXTR, LTF, CCR9, SLC25A26, ARF4, CCR3, U5, U6, 5S_rRNA, U2, U1
19:59021514:59051941	19	59021514	59051941	0.030427	242		, MYD88, CATHL3, BAC5, SC5, ELP6, RAB7A, OXTR, LTF, CCR9, SLC25A26, ARF4, CCR3, U5, U6, 5S_rRNA, U2, U1
19:59846044:60036999	19	59846044	60036999	0.190955	242		, MYD88, CATHL3, BAC5, SC5, ELP6, RAB7A, OXTR, LTF, CCR9, SLC25A26, ARF4, CCR3, U5, U6, 5S_rRNA, U2, U1
19:60258539:60751585	19	60258539	60751585	0.493046	242		, MYD88, CATHL3, BAC5, SC5, ELP6, RAB7A, OXTR, LTF, CCR9, SLC25A26, ARF4, CCR3, U5, U6, 5S_rRNA, U2, U1
19:63114717:64803054	19	63114717	64803054	1.68834	242		, MYD88, CATHL3, BAC5, SC5, ELP6, RAB7A, OXTR, LTF, CCR9, SLC25A26, ARF4, CCR3, U5, U6, 5S_rRNA, U2, U1
19:701307:3375953	19	701307	3375953	2.67465	242		, MYD88, CATHL3, BAC5, SC5, ELP6, RAB7A, OXTR, LTF, CCR9, SLC25A26, ARF4, CCR3, U5, U6, 5S_rRNA, U2, U1
19:7750602:8765956	19	7750602	8765956	1.01535	242		, MYD88, CATHL3, BAC5, SC5, ELP6, RAB7A, OXTR, LTF, CCR9, SLC25A26, ARF4, CCR3, U5, U6, 5S_rRNA, U2, U1
1:104772499:106558510	1	104772499	106558510	1.78601	616		, BGLAP, NCK1, KAP7, SLAMF9, SLCO2A1, SLAMF1, RABGGTB, RCAN1, SPP2, UGT1A1, FGF12, RTP4, ST6GAL1, U6, U2, 5S_rRNA, SNORA70, 7SK, U1, U8, SNORA72, ARL4C
1:109179099:110308273	1	109179099	110308273	1.12917	616		, BGLAP, NCK1, KAP7, SLAMF9, SLCO2A1, SLAMF1, RABGGTB, RCAN1, SPP2, UGT1A1, FGF12, RTP4, ST6GAL1, U6, U2, 5S_rRNA, SNORA70, 7SK, U1, U8, SNORA72, ARL4C
1:111591967:111591967	1	111591967	111591967	0	616		, BGLAP, NCK1, KAP7, SLAMF9, SLCO2A1, SLAMF1, RABGGTB, RCAN1, SPP2, UGT1A1, FGF12, RTP4, ST6GAL1, U6, U2, 5S_rRNA, SNORA70, 7SK, U1, U8, SNORA72, ARL4C
1:113245030:114388832	1	113245030	114388832	1.1438	616		, BGLAP, NCK1, KAP7, SLAMF9, SLCO2A1, SLAMF1, RABGGTB, RCAN1, SPP2, UGT1A1, FGF12, RTP4, ST6GAL1, U6, U2, 5S_rRNA, SNORA70, 7SK, U1, U8, SNORA72, ARL4C
1:118267581:119335876	1	118267581	119335876	1.06829	616		, BGLAP, NCK1, KAP7, SLAMF9, SLCO2A1, SLAMF1, RABGGTB, RCAN1, SPP2, UGT1A1, FGF12, RTP4, ST6GAL1, U6, U2, 5S_rRNA, SNORA70, 7SK, U1, U8, SNORA72, ARL4C
1:122230642:123158743	1	122230642	123158743	0.928101	616		, BGLAP, NCK1, KAP7, SLAMF9, SLCO2A1, SLAMF1, RABGGTB, RCAN1, SPP2, UGT1A1, FGF12, RTP4, ST6GAL1, U6, U2, 5S_rRNA, SNORA70, 7SK, U1, U8, SNORA72, ARL4C
1:124966069:125652023	1	124966069	125652023	0.685954	616		, BGLAP, NCK1, KAP7, SLAMF9, SLCO2A1, SLAMF1, RABGGTB, RCAN1, SPP2, UGT1A1, FGF12, RTP4, ST6GAL1, U6, U2, 5S_rRNA, SNORA70, 7SK, U1, U8, SNORA72, ARL4C
1:126708341:128118751	1	126708341	128118751	1.41041	616		, BGLAP, NCK1, KAP7, SLAMF9, SLCO2A1, SLAMF1, RABGGTB, RCAN1, SPP2, UGT1A1, FGF12, RTP4, ST6GAL1, U6, U2, 5S_rRNA, SNORA70, 7SK, U1, U8, SNORA72, ARL4C
1:129127850:130854923	1	129127850	130854923	1.72707	616		, BGLAP, NCK1, KAP7, SLAMF9, SLCO2A1, SLAMF1, RABGGTB, RCAN1, SPP2, UGT1A1, FGF12, RTP4, ST6GAL1, U6, U2, 5S_rRNA, SNORA70, 7SK, U1, U8, SNORA72, ARL4C
1:130922073:132183172	1	130922073	132183172	1.2611	616		, BGLAP, NCK1, KAP7, SLAMF9, SLCO2A1, SLAMF1, RABGGTB, RCAN1, SPP2, UGT1A1, FGF12, RTP4, ST6GAL1, U6, U2, 5S_rRNA, SNORA70, 7SK, U1, U8, SNORA72, ARL4C
1:133238194:133250051	1	133238194	133250051	0.011857	616		, BGLAP, NCK1, KAP7, SLAMF9, SLCO2A1, SLAMF1, RABGGTB, RCAN1, SPP2, UGT1A1, FGF12, RTP4, ST6GAL1, U6, U2, 5S_rRNA, SNORA70, 7SK, U1, U8, SNORA72, ARL4C
1:133604853:134686503	1	133604853	134686503	1.08165	616		, BGLAP, NCK1, KAP7, SLAMF9, SLCO2A1, SLAMF1, RABGGTB, RCAN1, SPP2, UGT1A1, FGF12, RTP4, ST6GAL1, U6, U2, 5S_rRNA, SNORA70, 7SK, U1, U8, SNORA72, ARL4C
1:135241909:136249417	1	135241909	136249417	1.00751	616		, BGLAP, NCK1, KAP7, SLAMF9, SLCO2A1, SLAMF1, RABGGTB, RCAN1, SPP2, UGT1A1, FGF12, RTP4, ST6GAL1, U6, U2, 5S_rRNA, SNORA70, 7SK, U1, U8, SNORA72, ARL4C
1:139632696:139632696	1	139632696	139632696	0	616		, BGLAP, NCK1, KAP7, SLAMF9, SLCO2A1, SLAMF1, RABGGTB, RCAN1, SPP2, UGT1A1, FGF12, RTP4, ST6GAL1, U6, U2, 5S_rRNA, SNORA70, 7SK, U1, U8, SNORA72, ARL4C
1:141493314:143906394	1	141493314	143906394	2.41308	616		, BGLAP, NCK1, KAP7, SLAMF9, SLCO2A1, SLAMF1, RABGGTB, RCAN1, SPP2, UGT1A1, FGF12, RTP4, ST6GAL1, U6, U2, 5S_rRNA, SNORA70, 7SK, U1, U8, SNORA72, ARL4C
1:144341567:144435208	1	144341567	144435208	0.093641	616		, BGLAP, NCK1, KAP7, SLAMF9, SLCO2A1, SLAMF1, RABGGTB, RCAN1, SPP2, UGT1A1, FGF12, RTP4, ST6GAL1, U6, U2, 5S_rRNA, SNORA70, 7SK, U1, U8, SNORA72, ARL4C
1:146390398:147627493	1	146390398	147627493	1.2371	616		, BGLAP, NCK1, KAP7, SLAMF9, SLCO2A1, SLAMF1, RABGGTB, RCAN1, SPP2, UGT1A1, FGF12, RTP4, ST6GAL1, U6, U2, 5S_rRNA, SNORA70, 7SK, U1, U8, SNORA72, ARL4C
1:151903618:153088363	1	151903618	153088363	1.18474	616		, BGLAP, NCK1, KAP7, SLAMF9, SLCO2A1, SLAMF1, RABGGTB, RCAN1, SPP2, UGT1A1, FGF12, RTP4, ST6GAL1, U6, U2, 5S_rRNA, SNORA70, 7SK, U1, U8, SNORA72, ARL4C
1:159403082:159403082	1	159403082	159403082	0	616		, BGLAP, NCK1, KAP7, SLAMF9, SLCO2A1, SLAMF1, RABGGTB, RCAN1, SPP2, UGT1A1, FGF12, RTP4, ST6GAL1, U6, U2, 5S_rRNA, SNORA70, 7SK, U1, U8, SNORA72, ARL4C
1:160256874:160291007	1	160256874	160291007	0.034133	616		, BGLAP, NCK1, KAP7, SLAMF9, SLCO2A1, SLAMF1, RABGGTB, RCAN1, SPP2, UGT1A1, FGF12, RTP4, ST6GAL1, U6, U2, 5S_rRNA, SNORA70, 7SK, U1, U8, SNORA72, ARL4C
1:160713563:162594169	1	160713563	162594169	1.88061	616		, BGLAP, NCK1, KAP7, SLAMF9, SLCO2A1, SLAMF1, RABGGTB, RCAN1, SPP2, UGT1A1, FGF12, RTP4, ST6GAL1, U6, U2, 5S_rRNA, SNORA70, 7SK, U1, U8, SNORA72, ARL4C
1:163950279:165146142	1	163950279	165146142	1.19586	616		, BGLAP, NCK1, KAP7, SLAMF9, SLCO2A1, SLAMF1, RABGGTB, RCAN1, SPP2, UGT1A1, FGF12, RTP4, ST6GAL1, U6, U2, 5S_rRNA, SNORA70, 7SK, U1, U8, SNORA72, ARL4C
1:166464425:166681633	1	166464425	166681633	0.217208	616		, BGLAP, NCK1, KAP7, SLAMF9, SLCO2A1, SLAMF1, RABGGTB, RCAN1, SPP2, UGT1A1, FGF12, RTP4, ST6GAL1, U6, U2, 5S_rRNA, SNORA70, 7SK, U1, U8, SNORA72, ARL4C
1:174344110:174506919	1	174344110	174506919	0.162809	616		, BGLAP, NCK1, KAP7, SLAMF9, SLCO2A1, SLAMF1, RABGGTB, RCAN1, SPP2, UGT1A1, FGF12, RTP4, ST6GAL1, U6, U2, 5S_rRNA, SNORA70, 7SK, U1, U8, SNORA72, ARL4C
1:174790984:178282136	1	174790984	178282136	3.49115	616		, BGLAP, NCK1, KAP7, SLAMF9, SLCO2A1, SLAMF1, RABGGTB, RCAN1, SPP2, UGT1A1, FGF12, RTP4, ST6GAL1, U6, U2, 5S_rRNA, SNORA70, 7SK, U1, U8, SNORA72, ARL4C
1:179699772:182335637	1	179699772	182335637	2.63586	616		, BGLAP, NCK1, KAP7, SLAMF9, SLCO2A1, SLAMF1, RABGGTB, RCAN1, SPP2, UGT1A1, FGF12, RTP4, ST6GAL1, U6, U2, 5S_rRNA, SNORA70, 7SK, U1, U8, SNORA72, ARL4C
1:193353910:194709461	1	193353910	194709461	1.35555	616		, BGLAP, NCK1, KAP7, SLAMF9, SLCO2A1, SLAMF1, RABGGTB, RCAN1, SPP2, UGT1A1, FGF12, RTP4, ST6GAL1, U6, U2, 5S_rRNA, SNORA70, 7SK, U1, U8, SNORA72, ARL4C
1:198163788:198449920	1	198163788	198449920	0.286132	616		, BGLAP, NCK1, KAP7, SLAMF9, SLCO2A1, SLAMF1, RABGGTB, RCAN1, SPP2, UGT1A1, FGF12, RTP4, ST6GAL1, U6, U2, 5S_rRNA, SNORA70, 7SK, U1, U8, SNORA72, ARL4C
1:202242640:205214709	1	202242640	205214709	2.97207	616		, BGLAP, NCK1, KAP7, SLAMF9, SLCO2A1, SLAMF1, RABGGTB, RCAN1, SPP2, UGT1A1, FGF12, RTP4, ST6GAL1, U6, U2, 5S_rRNA, SNORA70, 7SK, U1, U8, SNORA72, ARL4C
1:211453207:211951869	1	211453207	211951869	0.498662	616		, BGLAP, NCK1, KAP7, SLAMF9, SLCO2A1, SLAMF1, RABGGTB, RCAN1, SPP2, UGT1A1, FGF12, RTP4, ST6GAL1, U6, U2, 5S_rRNA, SNORA70, 7SK, U1, U8, SNORA72, ARL4C
1:216871975:218519133	1	216871975	218519133	1.64716	616		, BGLAP, NCK1, KAP7, SLAMF9, SLCO2A1, SLAMF1, RABGGTB, RCAN1, SPP2, UGT1A1, FGF12, RTP4, ST6GAL1, U6, U2, 5S_rRNA, SNORA70, 7SK, U1, U8, SNORA72, ARL4C
1:218845331:219943628	1	218845331	219943628	1.0983	616		, BGLAP, NCK1, KAP7, SLAMF9, SLCO2A1, SLAMF1, RABGGTB, RCAN1, SPP2, UGT1A1, FGF12, RTP4, ST6GAL1, U6, U2, 5S_rRNA, SNORA70, 7SK, U1, U8, SNORA72, ARL4C
1:220469110:222070640	1	220469110	222070640	1.60153	616		, BGLAP, NCK1, KAP7, SLAMF9, SLCO2A1, SLAMF1, RABGGTB, RCAN1, SPP2, UGT1A1, FGF12, RTP4, ST6GAL1, U6, U2, 5S_rRNA, SNORA70, 7SK, U1, U8, SNORA72, ARL4C
1:228557015:229539652	1	228557015	229539652	0.982637	616		, BGLAP, NCK1, KAP7, SLAMF9, SLCO2A1, SLAMF1, RABGGTB, RCAN1, SPP2, UGT1A1, FGF12, RTP4, ST6GAL1, U6, U2, 5S_rRNA, SNORA70, 7SK, U1, U8, SNORA72, ARL4C
1:229801437:230809784	1	229801437	230809784	1.00835	616		, BGLAP, NCK1, KAP7, SLAMF9, SLCO2A1, SLAMF1, RABGGTB, RCAN1, SPP2, UGT1A1, FGF12, RTP4, ST6GAL1, U6, U2, 5S_rRNA, SNORA70, 7SK, U1, U8, SNORA72, ARL4C
1:232715841:233555941	1	232715841	233555941	0.8401	616		, BGLAP, NCK1, KAP7, SLAMF9, SLCO2A1, SLAMF1, RABGGTB, RCAN1, SPP2, UGT1A1, FGF12, RTP4, ST6GAL1, U6, U2, 5S_rRNA, SNORA70, 7SK, U1, U8, SNORA72, ARL4C
1:238015445:241831179	1	238015445	241831179	3.81573	616		, BGLAP, NCK1, KAP7, SLAMF9, SLCO2A1, SLAMF1, RABGGTB, RCAN1, SPP2, UGT1A1, FGF12, RTP4, ST6GAL1, U6, U2, 5S_rRNA, SNORA70, 7SK, U1, U8, SNORA72, ARL4C
1:244475780:244754104	1	244475780	244754104	0.278324	616		, BGLAP, NCK1, KAP7, SLAMF9, SLCO2A1, SLAMF1, RABGGTB, RCAN1, SPP2, UGT1A1, FGF12, RTP4, ST6GAL1, U6, U2, 5S_rRNA, SNORA70, 7SK, U1, U8, SNORA72, ARL4C
1:245847989:245847989	1	245847989	245847989	0	616		, BGLAP, NCK1, KAP7, SLAMF9, SLCO2A1, SLAMF1, RABGGTB, RCAN1, SPP2, UGT1A1, FGF12, RTP4, ST6GAL1, U6, U2, 5S_rRNA, SNORA70, 7SK, U1, U8, SNORA72, ARL4C
1:24872941:26088084	1	24872941	26088084	1.21514	616		, BGLAP, NCK1, KAP7, SLAMF9, SLCO2A1, SLAMF1, RABGGTB, RCAN1, SPP2, UGT1A1, FGF12, RTP4, ST6GAL1, U6, U2, 5S_rRNA, SNORA70, 7SK, U1, U8, SNORA72, ARL4C
1:249773760:250546322	1	249773760	250546322	0.772562	616		, BGLAP, NCK1, KAP7, SLAMF9, SLCO2A1, SLAMF1, RABGGTB, RCAN1, SPP2, UGT1A1, FGF12, RTP4, ST6GAL1, U6, U2, 5S_rRNA, SNORA70, 7SK, U1, U8, SNORA72, ARL4C
1:251887719:254917600	1	251887719	254917600	3.02988	616		, BGLAP, NCK1, KAP7, SLAMF9, SLCO2A1, SLAMF1, RABGGTB, RCAN1, SPP2, UGT1A1, FGF12, RTP4, ST6GAL1, U6, U2, 5S_rRNA, SNORA70, 7SK, U1, U8, SNORA72, ARL4C
1:257412697:259481836	1	257412697	259481836	2.06914	616		, BGLAP, NCK1, KAP7, SLAMF9, SLCO2A1, SLAMF1, RABGGTB, RCAN1, SPP2, UGT1A1, FGF12, RTP4, ST6GAL1, U6, U2, 5S_rRNA, SNORA70, 7SK, U1, U8, SNORA72, ARL4C
1:264320139:264774730	1	264320139	264774730	0.454591	616		, BGLAP, NCK1, KAP7, SLAMF9, SLCO2A1, SLAMF1, RABGGTB, RCAN1, SPP2, UGT1A1, FGF12, RTP4, ST6GAL1, U6, U2, 5S_rRNA, SNORA70, 7SK, U1, U8, SNORA72, ARL4C
1:267158246:268817825	1	267158246	268817825	1.65958	616		, BGLAP, NCK1, KAP7, SLAMF9, SLCO2A1, SLAMF1, RABGGTB, RCAN1, SPP2, UGT1A1, FGF12, RTP4, ST6GAL1, U6, U2, 5S_rRNA, SNORA70, 7SK, U1, U8, SNORA72, ARL4C
1:270181169:270405323	1	270181169	270405323	0.224154	616		, BGLAP, NCK1, KAP7, SLAMF9, SLCO2A1, SLAMF1, RABGGTB, RCAN1, SPP2, UGT1A1, FGF12, RTP4, ST6GAL1, U6, U2, 5S_rRNA, SNORA70, 7SK, U1, U8, SNORA72, ARL4C
1:271284322:272508440	1	271284322	272508440	1.22412	616		, BGLAP, NCK1, KAP7, SLAMF9, SLCO2A1, SLAMF1, RABGGTB, RCAN1, SPP2, UGT1A1, FGF12, RTP4, ST6GAL1, U6, U2, 5S_rRNA, SNORA70, 7SK, U1, U8, SNORA72, ARL4C
1:277983951:278750895	1	277983951	278750895	0.766944	616		, BGLAP, NCK1, KAP7, SLAMF9, SLCO2A1, SLAMF1, RABGGTB, RCAN1, SPP2, UGT1A1, FGF12, RTP4, ST6GAL1, U6, U2, 5S_rRNA, SNORA70, 7SK, U1, U8, SNORA72, ARL4C
1:285271038:286945964	1	285271038	286945964	1.67493	616		, BGLAP, NCK1, KAP7, SLAMF9, SLCO2A1, SLAMF1, RABGGTB, RCAN1, SPP2, UGT1A1, FGF12, RTP4, ST6GAL1, U6, U2, 5S_rRNA, SNORA70, 7SK, U1, U8, SNORA72, ARL4C
1:287295153:288630017	1	287295153	288630017	1.33486	616		, BGLAP, NCK1, KAP7, SLAMF9, SLCO2A1, SLAMF1, RABGGTB, RCAN1, SPP2, UGT1A1, FGF12, RTP4, ST6GAL1, U6, U2, 5S_rRNA, SNORA70, 7SK, U1, U8, SNORA72, ARL4C
1:298192686:298675951	1	298192686	298675951	0.483265	616		, BGLAP, NCK1, KAP7, SLAMF9, SLCO2A1, SLAMF1, RABGGTB, RCAN1, SPP2, UGT1A1, FGF12, RTP4, ST6GAL1, U6, U2, 5S_rRNA, SNORA70, 7SK, U1, U8, SNORA72, ARL4C
1:36892031:37498273	1	36892031	37498273	0.606242	616		, BGLAP, NCK1, KAP7, SLAMF9, SLCO2A1, SLAMF1, RABGGTB, RCAN1, SPP2, UGT1A1, FGF12, RTP4, ST6GAL1, U6, U2, 5S_rRNA, SNORA70, 7SK, U1, U8, SNORA72, ARL4C
1:43920426:45408089	1	43920426	45408089	1.48766	616		, BGLAP, NCK1, KAP7, SLAMF9, SLCO2A1, SLAMF1, RABGGTB, RCAN1, SPP2, UGT1A1, FGF12, RTP4, ST6GAL1, U6, U2, 5S_rRNA, SNORA70, 7SK, U1, U8, SNORA72, ARL4C
1:47377110:48518941	1	47377110	48518941	1.14183	616		, BGLAP, NCK1, KAP7, SLAMF9, SLCO2A1, SLAMF1, RABGGTB, RCAN1, SPP2, UGT1A1, FGF12, RTP4, ST6GAL1, U6, U2, 5S_rRNA, SNORA70, 7SK, U1, U8, SNORA72, ARL4C
1:50383125:51895749	1	50383125	51895749	1.51262	616		, BGLAP, NCK1, KAP7, SLAMF9, SLCO2A1, SLAMF1, RABGGTB, RCAN1, SPP2, UGT1A1, FGF12, RTP4, ST6GAL1, U6, U2, 5S_rRNA, SNORA70, 7SK, U1, U8, SNORA72, ARL4C
1:52518679:52518679	1	52518679	52518679	0	616		, BGLAP, NCK1, KAP7, SLAMF9, SLCO2A1, SLAMF1, RABGGTB, RCAN1, SPP2, UGT1A1, FGF12, RTP4, ST6GAL1, U6, U2, 5S_rRNA, SNORA70, 7SK, U1, U8, SNORA72, ARL4C
1:56300095:57941516	1	56300095	57941516	1.64142	616		, BGLAP, NCK1, KAP7, SLAMF9, SLCO2A1, SLAMF1, RABGGTB, RCAN1, SPP2, UGT1A1, FGF12, RTP4, ST6GAL1, U6, U2, 5S_rRNA, SNORA70, 7SK, U1, U8, SNORA72, ARL4C
1:6316082:7851921	1	6316082	7851921	1.53584	616		, BGLAP, NCK1, KAP7, SLAMF9, SLCO2A1, SLAMF1, RABGGTB, RCAN1, SPP2, UGT1A1, FGF12, RTP4, ST6GAL1, U6, U2, 5S_rRNA, SNORA70, 7SK, U1, U8, SNORA72, ARL4C
1:65096784:66124879	1	65096784	66124879	1.02809	616		, BGLAP, NCK1, KAP7, SLAMF9, SLCO2A1, SLAMF1, RABGGTB, RCAN1, SPP2, UGT1A1, FGF12, RTP4, ST6GAL1, U6, U2, 5S_rRNA, SNORA70, 7SK, U1, U8, SNORA72, ARL4C
1:68758775:68758775	1	68758775	68758775	0	616		, BGLAP, NCK1, KAP7, SLAMF9, SLCO2A1, SLAMF1, RABGGTB, RCAN1, SPP2, UGT1A1, FGF12, RTP4, ST6GAL1, U6, U2, 5S_rRNA, SNORA70, 7SK, U1, U8, SNORA72, ARL4C
1:69092794:69101842	1	69092794	69101842	0.009048	616		, BGLAP, NCK1, KAP7, SLAMF9, SLCO2A1, SLAMF1, RABGGTB, RCAN1, SPP2, UGT1A1, FGF12, RTP4, ST6GAL1, U6, U2, 5S_rRNA, SNORA70, 7SK, U1, U8, SNORA72, ARL4C
1:89606616:90598120	1	89606616	90598120	0.991504	616		, BGLAP, NCK1, KAP7, SLAMF9, SLCO2A1, SLAMF1, RABGGTB, RCAN1, SPP2, UGT1A1, FGF12, RTP4, ST6GAL1, U6, U2, 5S_rRNA, SNORA70, 7SK, U1, U8, SNORA72, ARL4C
1:93219257:93564852	1	93219257	93564852	0.345595	616		, BGLAP, NCK1, KAP7, SLAMF9, SLCO2A1, SLAMF1, RABGGTB, RCAN1, SPP2, UGT1A1, FGF12, RTP4, ST6GAL1, U6, U2, 5S_rRNA, SNORA70, 7SK, U1, U8, SNORA72, ARL4C
1:93837016:93866510	1	93837016	93866510	0.029494	616		, BGLAP, NCK1, KAP7, SLAMF9, SLCO2A1, SLAMF1, RABGGTB, RCAN1, SPP2, UGT1A1, FGF12, RTP4, ST6GAL1, U6, U2, 5S_rRNA, SNORA70, 7SK, U1, U8, SNORA72, ARL4C
1:93969377:95378272	1	93969377	95378272	1.4089	616		, BGLAP, NCK1, KAP7, SLAMF9, SLCO2A1, SLAMF1, RABGGTB, RCAN1, SPP2, UGT1A1, FGF12, RTP4, ST6GAL1, U6, U2, 5S_rRNA, SNORA70, 7SK, U1, U8, SNORA72, ARL4C
1:9403382:10087797	1	9403382	10087797	0.684415	616		, BGLAP, NCK1, KAP7, SLAMF9, SLCO2A1, SLAMF1, RABGGTB, RCAN1, SPP2, UGT1A1, FGF12, RTP4, ST6GAL1, U6, U2, 5S_rRNA, SNORA70, 7SK, U1, U8, SNORA72, ARL4C
20:11955976:13689239	20	11955976	13689239	1.73326	209		, PRP2, VEGFA, PRL, ATAT1, GPX5, UBE2N, U6, 7SK, SNORA70, 5S_rRNA, U7, Metazoa_SRP
20:17446294:18620344	20	17446294	18620344	1.17405	209		, PRP2, VEGFA, PRL, ATAT1, GPX5, UBE2N, U6, 7SK, SNORA70, 5S_rRNA, U7, Metazoa_SRP
20:192404:2968217	20	192404	2968217	2.77581	209		, PRP2, VEGFA, PRL, ATAT1, GPX5, UBE2N, U6, 7SK, SNORA70, 5S_rRNA, U7, Metazoa_SRP
20:27259292:29777243	20	27259292	29777243	2.51795	209		, PRP2, VEGFA, PRL, ATAT1, GPX5, UBE2N, U6, 7SK, SNORA70, 5S_rRNA, U7, Metazoa_SRP
20:32406352:34163715	20	32406352	34163715	1.75736	209		, PRP2, VEGFA, PRL, ATAT1, GPX5, UBE2N, U6, 7SK, SNORA70, 5S_rRNA, U7, Metazoa_SRP
20:51009234:51056668	20	51009234	51056668	0.047434	209		, PRP2, VEGFA, PRL, ATAT1, GPX5, UBE2N, U6, 7SK, SNORA70, 5S_rRNA, U7, Metazoa_SRP
20:8576040:9311938	20	8576040	9311938	0.735898	209		, PRP2, VEGFA, PRL, ATAT1, GPX5, UBE2N, U6, 7SK, SNORA70, 5S_rRNA, U7, Metazoa_SRP
21:10388410:10888052	21	10388410	10888052	0.499642	271		, TYR, PYGM, ARL2, SDHAF2, CAPN1, FTH1, SCGB1A1, FEN1, CFL1, 5S_rRNA, SNORA70, 7SK, U6, oar-mir-194
21:19896489:21575531	21	19896489	21575531	1.67904	271		, TYR, PYGM, ARL2, SDHAF2, CAPN1, FTH1, SCGB1A1, FEN1, CFL1, 5S_rRNA, SNORA70, 7SK, U6, oar-mir-194
21:2948452:3320016	21	2948452	3320016	0.371564	271		, TYR, PYGM, ARL2, SDHAF2, CAPN1, FTH1, SCGB1A1, FEN1, CFL1, 5S_rRNA, SNORA70, 7SK, U6, oar-mir-194
21:39087811:40370311	21	39087811	40370311	1.2825	271		, TYR, PYGM, ARL2, SDHAF2, CAPN1, FTH1, SCGB1A1, FEN1, CFL1, 5S_rRNA, SNORA70, 7SK, U6, oar-mir-194
21:41709390:43433542	21	41709390	43433542	1.72415	271		, TYR, PYGM, ARL2, SDHAF2, CAPN1, FTH1, SCGB1A1, FEN1, CFL1, 5S_rRNA, SNORA70, 7SK, U6, oar-mir-194
21:4384712:4663752	21	4384712	4663752	0.27904	271		, TYR, PYGM, ARL2, SDHAF2, CAPN1, FTH1, SCGB1A1, FEN1, CFL1, 5S_rRNA, SNORA70, 7SK, U6, oar-mir-194
21:48652228:52158789	21	48652228	52158789	3.50656	271		, TYR, PYGM, ARL2, SDHAF2, CAPN1, FTH1, SCGB1A1, FEN1, CFL1, 5S_rRNA, SNORA70, 7SK, U6, oar-mir-194
21:5017959:5081457	21	5017959	5081457	0.063498	271		, TYR, PYGM, ARL2, SDHAF2, CAPN1, FTH1, SCGB1A1, FEN1, CFL1, 5S_rRNA, SNORA70, 7SK, U6, oar-mir-194
21:5617834:6339722	21	5617834	6339722	0.721888	271		, TYR, PYGM, ARL2, SDHAF2, CAPN1, FTH1, SCGB1A1, FEN1, CFL1, 5S_rRNA, SNORA70, 7SK, U6, oar-mir-194
22:18416239:20324930	22	18416239	20324930	1.90869	54		, SCD, U6, U3
22:2008671:3998624	22	2008671	3998624	1.98995	54		, SCD, U6, U3
22:23651179:23827107	22	23651179	23827107	0.175928	54		, SCD, U6, U3
22:26079325:26303352	22	26079325	26303352	0.224027	54		, SCD, U6, U3
22:26517116:26909694	22	26517116	26909694	0.392578	54		, SCD, U6, U3
22:40312067:40512665	22	40312067	40512665	0.200598	54		, SCD, U6, U3
22:41922405:42453919	22	41922405	42453919	0.531514	54		, SCD, U6, U3
22:42602134:42790463	22	42602134	42790463	0.188329	54		, SCD, U6, U3
23:13796479:14857415	23	13796479	14857415	1.06094	102		, MC5R, SLC14A1, MC2R, MRCL3, U6, SNORA70, 7SK, 5S_rRNA
23:17211146:17640092	23	17211146	17640092	0.428946	102		, MC5R, SLC14A1, MC2R, MRCL3, U6, SNORA70, 7SK, 5S_rRNA
23:17776480:17878416	23	17776480	17878416	0.101936	102		, MC5R, SLC14A1, MC2R, MRCL3, U6, SNORA70, 7SK, 5S_rRNA
23:19158789:20426227	23	19158789	20426227	1.26744	102		, MC5R, SLC14A1, MC2R, MRCL3, U6, SNORA70, 7SK, 5S_rRNA
23:26161995:27831559	23	26161995	27831559	1.66956	102		, MC5R, SLC14A1, MC2R, MRCL3, U6, SNORA70, 7SK, 5S_rRNA
23:33285293:34361658	23	33285293	34361658	1.07637	102		, MC5R, SLC14A1, MC2R, MRCL3, U6, SNORA70, 7SK, 5S_rRNA
23:35753873:36500297	23	35753873	36500297	0.746424	102		, MC5R, SLC14A1, MC2R, MRCL3, U6, SNORA70, 7SK, 5S_rRNA
23:37556292:38908114	23	37556292	38908114	1.35182	102		, MC5R, SLC14A1, MC2R, MRCL3, U6, SNORA70, 7SK, 5S_rRNA
23:43924682:46518355	23	43924682	46518355	2.59367	102		, MC5R, SLC14A1, MC2R, MRCL3, U6, SNORA70, 7SK, 5S_rRNA
23:51339429:52787252	23	51339429	52787252	1.44782	102		, MC5R, SLC14A1, MC2R, MRCL3, U6, SNORA70, 7SK, 5S_rRNA
23:56283829:57503593	23	56283829	57503593	1.21976	102		, MC5R, SLC14A1, MC2R, MRCL3, U6, SNORA70, 7SK, 5S_rRNA
23:61174115:61989046	23	61174115	61989046	0.814931	102		, MC5R, SLC14A1, MC2R, MRCL3, U6, SNORA70, 7SK, 5S_rRNA
23:62243471:62266238	23	62243471	62266238	0.022767	102		, MC5R, SLC14A1, MC2R, MRCL3, U6, SNORA70, 7SK, 5S_rRNA
23:64010731:65206347	23	64010731	65206347	1.19562	102		, MC5R, SLC14A1, MC2R, MRCL3, U6, SNORA70, 7SK, 5S_rRNA
23:931044:1473867	23	931044	1473867	0.542823	102		, MC5R, SLC14A1, MC2R, MRCL3, U6, SNORA70, 7SK, 5S_rRNA
24:14565217:15980862	24	14565217	15980862	1.41565	351		, AIMP2, RAC1, ACTB, NUBP1, ITGAM, PSPH, RAN, SERPINE1, EPO, CYP3A24, 5S_rRNA, SNORA70, SNORD14, U6, oar-mir-106b, oar-mir-25, 7SK, CLDN4
24:17259252:17892863	24	17259252	17892863	0.633611	351		, AIMP2, RAC1, ACTB, NUBP1, ITGAM, PSPH, RAN, SERPINE1, EPO, CYP3A24, 5S_rRNA, SNORA70, SNORD14, U6, oar-mir-106b, oar-mir-25, 7SK, CLDN4
24:17966738:18276904	24	17966738	18276904	0.310166	351		, AIMP2, RAC1, ACTB, NUBP1, ITGAM, PSPH, RAN, SERPINE1, EPO, CYP3A24, 5S_rRNA, SNORA70, SNORD14, U6, oar-mir-106b, oar-mir-25, 7SK, CLDN4
24:18664965:20844240	24	18664965	20844240	2.17928	351		, AIMP2, RAC1, ACTB, NUBP1, ITGAM, PSPH, RAN, SERPINE1, EPO, CYP3A24, 5S_rRNA, SNORA70, SNORD14, U6, oar-mir-106b, oar-mir-25, 7SK, CLDN4
24:21144580:21411103	24	21144580	21411103	0.266523	351		, AIMP2, RAC1, ACTB, NUBP1, ITGAM, PSPH, RAN, SERPINE1, EPO, CYP3A24, 5S_rRNA, SNORA70, SNORD14, U6, oar-mir-106b, oar-mir-25, 7SK, CLDN4
24:21654146:22502490	24	21654146	22502490	0.848344	351		, AIMP2, RAC1, ACTB, NUBP1, ITGAM, PSPH, RAN, SERPINE1, EPO, CYP3A24, 5S_rRNA, SNORA70, SNORD14, U6, oar-mir-106b, oar-mir-25, 7SK, CLDN4
24:23376702:24662380	24	23376702	24662380	1.28568	351		, AIMP2, RAC1, ACTB, NUBP1, ITGAM, PSPH, RAN, SERPINE1, EPO, CYP3A24, 5S_rRNA, SNORA70, SNORD14, U6, oar-mir-106b, oar-mir-25, 7SK, CLDN4
24:27475486:28523370	24	27475486	28523370	1.04788	351		, AIMP2, RAC1, ACTB, NUBP1, ITGAM, PSPH, RAN, SERPINE1, EPO, CYP3A24, 5S_rRNA, SNORA70, SNORD14, U6, oar-mir-106b, oar-mir-25, 7SK, CLDN4
24:29121200:29121200	24	29121200	29121200	0	351		, AIMP2, RAC1, ACTB, NUBP1, ITGAM, PSPH, RAN, SERPINE1, EPO, CYP3A24, 5S_rRNA, SNORA70, SNORD14, U6, oar-mir-106b, oar-mir-25, 7SK, CLDN4
24:29972448:30139570	24	29972448	30139570	0.167122	351		, AIMP2, RAC1, ACTB, NUBP1, ITGAM, PSPH, RAN, SERPINE1, EPO, CYP3A24, 5S_rRNA, SNORA70, SNORD14, U6, oar-mir-106b, oar-mir-25, 7SK, CLDN4
24:30266733:31351608	24	30266733	31351608	1.08488	351		, AIMP2, RAC1, ACTB, NUBP1, ITGAM, PSPH, RAN, SERPINE1, EPO, CYP3A24, 5S_rRNA, SNORA70, SNORD14, U6, oar-mir-106b, oar-mir-25, 7SK, CLDN4
24:32820415:34073156	24	32820415	34073156	1.25274	351		, AIMP2, RAC1, ACTB, NUBP1, ITGAM, PSPH, RAN, SERPINE1, EPO, CYP3A24, 5S_rRNA, SNORA70, SNORD14, U6, oar-mir-106b, oar-mir-25, 7SK, CLDN4
24:35475903:36511570	24	35475903	36511570	1.03567	351		, AIMP2, RAC1, ACTB, NUBP1, ITGAM, PSPH, RAN, SERPINE1, EPO, CYP3A24, 5S_rRNA, SNORA70, SNORD14, U6, oar-mir-106b, oar-mir-25, 7SK, CLDN4
24:37211531:38694915	24	37211531	38694915	1.48338	351		, AIMP2, RAC1, ACTB, NUBP1, ITGAM, PSPH, RAN, SERPINE1, EPO, CYP3A24, 5S_rRNA, SNORA70, SNORD14, U6, oar-mir-106b, oar-mir-25, 7SK, CLDN4
24:3808531:5151627	24	3808531	5151627	1.3431	351		, AIMP2, RAC1, ACTB, NUBP1, ITGAM, PSPH, RAN, SERPINE1, EPO, CYP3A24, 5S_rRNA, SNORA70, SNORD14, U6, oar-mir-106b, oar-mir-25, 7SK, CLDN4
24:39257501:39539914	24	39257501	39539914	0.282413	351		, AIMP2, RAC1, ACTB, NUBP1, ITGAM, PSPH, RAN, SERPINE1, EPO, CYP3A24, 5S_rRNA, SNORA70, SNORD14, U6, oar-mir-106b, oar-mir-25, 7SK, CLDN4
24:9426433:14120825	24	9426433	14120825	4.69439	351		, AIMP2, RAC1, ACTB, NUBP1, ITGAM, PSPH, RAN, SERPINE1, EPO, CYP3A24, 5S_rRNA, SNORA70, SNORD14, U6, oar-mir-106b, oar-mir-25, 7SK, CLDN4
25:19086023:20554303	25	19086023	20554303	1.46828	20
25:29907224:30123828	25	29907224	30123828	0.216604	20
25:30245190:30245190	25	30245190	30245190	0	20
25:30607686:30728547	25	30607686	30728547	0.120861	20
25:39142108:40102868	25	39142108	40102868	0.96076	20
26:13740870:14807455	26	13740870	14807455	1.06658	46		, IRF2, SLC25A4, 5S_rRNA, U1
26:16350717:16926369	26	16350717	16926369	0.575652	46		, IRF2, SLC25A4, 5S_rRNA, U1
26:21641086:23260172	26	21641086	23260172	1.61909	46		, IRF2, SLC25A4, 5S_rRNA, U1
26:36755220:37930124	26	36755220	37930124	1.1749	46		, IRF2, SLC25A4, 5S_rRNA, U1
26:42480765:43292628	26	42480765	43292628	0.811863	46		, IRF2, SLC25A4, 5S_rRNA, U1
26:45028885:46203847	26	45028885	46203847	1.17496	46		, IRF2, SLC25A4, 5S_rRNA, U1
26:46279277:46279277	26	46279277	46279277	0	46		, IRF2, SLC25A4, 5S_rRNA, U1
26:844452:1797197	26	844452	1797197	0.952745	46		, IRF2, SLC25A4, 5S_rRNA, U1
2:103871475:105159311	2	103871475	105159311	1.28784	569		, GLRX, B4GALT1, SFTPC, LPL, ALDH1A1, CTSB, GULP1, ITGAV, ITM2C, U6, U4, 7SK, 5S_rRNA, SNORD82, RNase_MRP, SNORA75, SNORA70, SNORA73, U1
2:106620073:106690186	2	106620073	106690186	0.070113	569		, GLRX, B4GALT1, SFTPC, LPL, ALDH1A1, CTSB, GULP1, ITGAV, ITM2C, U6, U4, 7SK, 5S_rRNA, SNORD82, RNase_MRP, SNORA75, SNORA70, SNORA73, U1
2:109680498:109680498	2	109680498	109680498	0	569		, GLRX, B4GALT1, SFTPC, LPL, ALDH1A1, CTSB, GULP1, ITGAV, ITM2C, U6, U4, 7SK, 5S_rRNA, SNORD82, RNase_MRP, SNORA75, SNORA70, SNORA73, U1
2:113548946:114641124	2	113548946	114641124	1.09218	569		, GLRX, B4GALT1, SFTPC, LPL, ALDH1A1, CTSB, GULP1, ITGAV, ITM2C, U6, U4, 7SK, 5S_rRNA, SNORD82, RNase_MRP, SNORA75, SNORA70, SNORA73, U1
2:114908247:116153301	2	114908247	116153301	1.24505	569		, GLRX, B4GALT1, SFTPC, LPL, ALDH1A1, CTSB, GULP1, ITGAV, ITM2C, U6, U4, 7SK, 5S_rRNA, SNORD82, RNase_MRP, SNORA75, SNORA70, SNORA73, U1
2:116264255:116945286	2	116264255	116945286	0.681031	569		, GLRX, B4GALT1, SFTPC, LPL, ALDH1A1, CTSB, GULP1, ITGAV, ITM2C, U6, U4, 7SK, 5S_rRNA, SNORD82, RNase_MRP, SNORA75, SNORA70, SNORA73, U1
2:118934331:125238331	2	118934331	125238331	6.304	569		, GLRX, B4GALT1, SFTPC, LPL, ALDH1A1, CTSB, GULP1, ITGAV, ITM2C, U6, U4, 7SK, 5S_rRNA, SNORD82, RNase_MRP, SNORA75, SNORA70, SNORA73, U1
2:127446589:128570399	2	127446589	128570399	1.12381	569		, GLRX, B4GALT1, SFTPC, LPL, ALDH1A1, CTSB, GULP1, ITGAV, ITM2C, U6, U4, 7SK, 5S_rRNA, SNORD82, RNase_MRP, SNORA75, SNORA70, SNORA73, U1
2:130020916:131355799	2	130020916	131355799	1.33488	569		, GLRX, B4GALT1, SFTPC, LPL, ALDH1A1, CTSB, GULP1, ITGAV, ITM2C, U6, U4, 7SK, 5S_rRNA, SNORD82, RNase_MRP, SNORA75, SNORA70, SNORA73, U1
2:142454996:143746835	2	142454996	143746835	1.29184	569		, GLRX, B4GALT1, SFTPC, LPL, ALDH1A1, CTSB, GULP1, ITGAV, ITM2C, U6, U4, 7SK, 5S_rRNA, SNORD82, RNase_MRP, SNORA75, SNORA70, SNORA73, U1
2:168834417:168834417	2	168834417	168834417	0	569		, GLRX, B4GALT1, SFTPC, LPL, ALDH1A1, CTSB, GULP1, ITGAV, ITM2C, U6, U4, 7SK, 5S_rRNA, SNORD82, RNase_MRP, SNORA75, SNORA70, SNORA73, U1
2:168964248:170241551	2	168964248	170241551	1.2773	569		, GLRX, B4GALT1, SFTPC, LPL, ALDH1A1, CTSB, GULP1, ITGAV, ITM2C, U6, U4, 7SK, 5S_rRNA, SNORD82, RNase_MRP, SNORA75, SNORA70, SNORA73, U1
2:17356759:17356759	2	17356759	17356759	0	569		, GLRX, B4GALT1, SFTPC, LPL, ALDH1A1, CTSB, GULP1, ITGAV, ITM2C, U6, U4, 7SK, 5S_rRNA, SNORD82, RNase_MRP, SNORA75, SNORA70, SNORA73, U1
2:17972706:19500065	2	17972706	19500065	1.52736	569		, GLRX, B4GALT1, SFTPC, LPL, ALDH1A1, CTSB, GULP1, ITGAV, ITM2C, U6, U4, 7SK, 5S_rRNA, SNORD82, RNase_MRP, SNORA75, SNORA70, SNORA73, U1
2:180239034:180507304	2	180239034	180507304	0.26827	569		, GLRX, B4GALT1, SFTPC, LPL, ALDH1A1, CTSB, GULP1, ITGAV, ITM2C, U6, U4, 7SK, 5S_rRNA, SNORD82, RNase_MRP, SNORA75, SNORA70, SNORA73, U1
2:185983087:187509832	2	185983087	187509832	1.52675	569		, GLRX, B4GALT1, SFTPC, LPL, ALDH1A1, CTSB, GULP1, ITGAV, ITM2C, U6, U4, 7SK, 5S_rRNA, SNORD82, RNase_MRP, SNORA75, SNORA70, SNORA73, U1
2:188638373:188765073	2	188638373	188765073	0.1267	569		, GLRX, B4GALT1, SFTPC, LPL, ALDH1A1, CTSB, GULP1, ITGAV, ITM2C, U6, U4, 7SK, 5S_rRNA, SNORD82, RNase_MRP, SNORA75, SNORA70, SNORA73, U1
2:189290786:189420386	2	189290786	189420386	0.1296	569		, GLRX, B4GALT1, SFTPC, LPL, ALDH1A1, CTSB, GULP1, ITGAV, ITM2C, U6, U4, 7SK, 5S_rRNA, SNORD82, RNase_MRP, SNORA75, SNORA70, SNORA73, U1
2:192645224:195968503	2	192645224	195968503	3.32328	569		, GLRX, B4GALT1, SFTPC, LPL, ALDH1A1, CTSB, GULP1, ITGAV, ITM2C, U6, U4, 7SK, 5S_rRNA, SNORD82, RNase_MRP, SNORA75, SNORA70, SNORA73, U1
2:19594087:21196617	2	19594087	21196617	1.60253	569		, GLRX, B4GALT1, SFTPC, LPL, ALDH1A1, CTSB, GULP1, ITGAV, ITM2C, U6, U4, 7SK, 5S_rRNA, SNORD82, RNase_MRP, SNORA75, SNORA70, SNORA73, U1
2:196253756:196253756	2	196253756	196253756	0	569		, GLRX, B4GALT1, SFTPC, LPL, ALDH1A1, CTSB, GULP1, ITGAV, ITM2C, U6, U4, 7SK, 5S_rRNA, SNORD82, RNase_MRP, SNORA75, SNORA70, SNORA73, U1
2:198845339:199280124	2	198845339	199280124	0.434785	569		, GLRX, B4GALT1, SFTPC, LPL, ALDH1A1, CTSB, GULP1, ITGAV, ITM2C, U6, U4, 7SK, 5S_rRNA, SNORD82, RNase_MRP, SNORA75, SNORA70, SNORA73, U1
2:209788611:210988344	2	209788611	210988344	1.19973	569		, GLRX, B4GALT1, SFTPC, LPL, ALDH1A1, CTSB, GULP1, ITGAV, ITM2C, U6, U4, 7SK, 5S_rRNA, SNORD82, RNase_MRP, SNORA75, SNORA70, SNORA73, U1
2:211658827:211775635	2	211658827	211775635	0.116808	569		, GLRX, B4GALT1, SFTPC, LPL, ALDH1A1, CTSB, GULP1, ITGAV, ITM2C, U6, U4, 7SK, 5S_rRNA, SNORD82, RNase_MRP, SNORA75, SNORA70, SNORA73, U1
2:215678142:215842155	2	215678142	215842155	0.164013	569		, GLRX, B4GALT1, SFTPC, LPL, ALDH1A1, CTSB, GULP1, ITGAV, ITM2C, U6, U4, 7SK, 5S_rRNA, SNORD82, RNase_MRP, SNORA75, SNORA70, SNORA73, U1
2:227769964:232388016	2	227769964	232388016	4.61805	569		, GLRX, B4GALT1, SFTPC, LPL, ALDH1A1, CTSB, GULP1, ITGAV, ITM2C, U6, U4, 7SK, 5S_rRNA, SNORD82, RNase_MRP, SNORA75, SNORA70, SNORA73, U1
2:237097273:237972207	2	237097273	237972207	0.874934	569		, GLRX, B4GALT1, SFTPC, LPL, ALDH1A1, CTSB, GULP1, ITGAV, ITM2C, U6, U4, 7SK, 5S_rRNA, SNORD82, RNase_MRP, SNORA75, SNORA70, SNORA73, U1
2:244417041:244886502	2	244417041	244886502	0.469461	569		, GLRX, B4GALT1, SFTPC, LPL, ALDH1A1, CTSB, GULP1, ITGAV, ITM2C, U6, U4, 7SK, 5S_rRNA, SNORD82, RNase_MRP, SNORA75, SNORA70, SNORA73, U1
2:244925652:245658841	2	244925652	245658841	0.733189	569		, GLRX, B4GALT1, SFTPC, LPL, ALDH1A1, CTSB, GULP1, ITGAV, ITM2C, U6, U4, 7SK, 5S_rRNA, SNORD82, RNase_MRP, SNORA75, SNORA70, SNORA73, U1
2:246702402:247800434	2	246702402	247800434	1.09803	569		, GLRX, B4GALT1, SFTPC, LPL, ALDH1A1, CTSB, GULP1, ITGAV, ITM2C, U6, U4, 7SK, 5S_rRNA, SNORD82, RNase_MRP, SNORA75, SNORA70, SNORA73, U1
2:247866179:247866179	2	247866179	247866179	0	569		, GLRX, B4GALT1, SFTPC, LPL, ALDH1A1, CTSB, GULP1, ITGAV, ITM2C, U6, U4, 7SK, 5S_rRNA, SNORD82, RNase_MRP, SNORA75, SNORA70, SNORA73, U1
2:249490013:251157985	2	249490013	251157985	1.66797	569		, GLRX, B4GALT1, SFTPC, LPL, ALDH1A1, CTSB, GULP1, ITGAV, ITM2C, U6, U4, 7SK, 5S_rRNA, SNORD82, RNase_MRP, SNORA75, SNORA70, SNORA73, U1
2:252710690:254669527	2	252710690	254669527	1.95884	569		, GLRX, B4GALT1, SFTPC, LPL, ALDH1A1, CTSB, GULP1, ITGAV, ITM2C, U6, U4, 7SK, 5S_rRNA, SNORD82, RNase_MRP, SNORA75, SNORA70, SNORA73, U1
2:29139555:30462879	2	29139555	30462879	1.32332	569		, GLRX, B4GALT1, SFTPC, LPL, ALDH1A1, CTSB, GULP1, ITGAV, ITM2C, U6, U4, 7SK, 5S_rRNA, SNORD82, RNase_MRP, SNORA75, SNORA70, SNORA73, U1
2:31293302:32488031	2	31293302	32488031	1.19473	569		, GLRX, B4GALT1, SFTPC, LPL, ALDH1A1, CTSB, GULP1, ITGAV, ITM2C, U6, U4, 7SK, 5S_rRNA, SNORD82, RNase_MRP, SNORA75, SNORA70, SNORA73, U1
2:36738295:39697287	2	36738295	39697287	2.95899	569		, GLRX, B4GALT1, SFTPC, LPL, ALDH1A1, CTSB, GULP1, ITGAV, ITM2C, U6, U4, 7SK, 5S_rRNA, SNORD82, RNase_MRP, SNORA75, SNORA70, SNORA73, U1
2:41368381:42759240	2	41368381	42759240	1.39086	569		, GLRX, B4GALT1, SFTPC, LPL, ALDH1A1, CTSB, GULP1, ITGAV, ITM2C, U6, U4, 7SK, 5S_rRNA, SNORD82, RNase_MRP, SNORA75, SNORA70, SNORA73, U1
2:43175231:43175231	2	43175231	43175231	0	569		, GLRX, B4GALT1, SFTPC, LPL, ALDH1A1, CTSB, GULP1, ITGAV, ITM2C, U6, U4, 7SK, 5S_rRNA, SNORD82, RNase_MRP, SNORA75, SNORA70, SNORA73, U1
2:43813804:46563404	2	43813804	46563404	2.7496	569		, GLRX, B4GALT1, SFTPC, LPL, ALDH1A1, CTSB, GULP1, ITGAV, ITM2C, U6, U4, 7SK, 5S_rRNA, SNORD82, RNase_MRP, SNORA75, SNORA70, SNORA73, U1
2:50172682:52036310	2	50172682	52036310	1.86363	569		, GLRX, B4GALT1, SFTPC, LPL, ALDH1A1, CTSB, GULP1, ITGAV, ITM2C, U6, U4, 7SK, 5S_rRNA, SNORD82, RNase_MRP, SNORA75, SNORA70, SNORA73, U1
2:52656407:57526461	2	52656407	57526461	4.87005	569		, GLRX, B4GALT1, SFTPC, LPL, ALDH1A1, CTSB, GULP1, ITGAV, ITM2C, U6, U4, 7SK, 5S_rRNA, SNORD82, RNase_MRP, SNORA75, SNORA70, SNORA73, U1
2:63138429:63530454	2	63138429	63530454	0.392025	569		, GLRX, B4GALT1, SFTPC, LPL, ALDH1A1, CTSB, GULP1, ITGAV, ITM2C, U6, U4, 7SK, 5S_rRNA, SNORD82, RNase_MRP, SNORA75, SNORA70, SNORA73, U1
2:71918076:73140784	2	71918076	73140784	1.22271	569		, GLRX, B4GALT1, SFTPC, LPL, ALDH1A1, CTSB, GULP1, ITGAV, ITM2C, U6, U4, 7SK, 5S_rRNA, SNORD82, RNase_MRP, SNORA75, SNORA70, SNORA73, U1
2:73858846:74565025	2	73858846	74565025	0.706179	569		, GLRX, B4GALT1, SFTPC, LPL, ALDH1A1, CTSB, GULP1, ITGAV, ITM2C, U6, U4, 7SK, 5S_rRNA, SNORD82, RNase_MRP, SNORA75, SNORA70, SNORA73, U1
2:7456485:7574512	2	7456485	7574512	0.118027	569		, GLRX, B4GALT1, SFTPC, LPL, ALDH1A1, CTSB, GULP1, ITGAV, ITM2C, U6, U4, 7SK, 5S_rRNA, SNORD82, RNase_MRP, SNORA75, SNORA70, SNORA73, U1
2:74924055:74995548	2	74924055	74995548	0.071493	569		, GLRX, B4GALT1, SFTPC, LPL, ALDH1A1, CTSB, GULP1, ITGAV, ITM2C, U6, U4, 7SK, 5S_rRNA, SNORD82, RNase_MRP, SNORA75, SNORA70, SNORA73, U1
2:75155745:75290243	2	75155745	75290243	0.134498	569		, GLRX, B4GALT1, SFTPC, LPL, ALDH1A1, CTSB, GULP1, ITGAV, ITM2C, U6, U4, 7SK, 5S_rRNA, SNORD82, RNase_MRP, SNORA75, SNORA70, SNORA73, U1
2:75375830:75375830	2	75375830	75375830	0	569		, GLRX, B4GALT1, SFTPC, LPL, ALDH1A1, CTSB, GULP1, ITGAV, ITM2C, U6, U4, 7SK, 5S_rRNA, SNORD82, RNase_MRP, SNORA75, SNORA70, SNORA73, U1
2:77139707:79836780	2	77139707	79836780	2.69707	569		, GLRX, B4GALT1, SFTPC, LPL, ALDH1A1, CTSB, GULP1, ITGAV, ITM2C, U6, U4, 7SK, 5S_rRNA, SNORD82, RNase_MRP, SNORA75, SNORA70, SNORA73, U1
2:88850381:90476100	2	88850381	90476100	1.62572	569		, GLRX, B4GALT1, SFTPC, LPL, ALDH1A1, CTSB, GULP1, ITGAV, ITM2C, U6, U4, 7SK, 5S_rRNA, SNORD82, RNase_MRP, SNORA75, SNORA70, SNORA73, U1
2:91934534:93002553	2	91934534	93002553	1.06802	569		, GLRX, B4GALT1, SFTPC, LPL, ALDH1A1, CTSB, GULP1, ITGAV, ITM2C, U6, U4, 7SK, 5S_rRNA, SNORD82, RNase_MRP, SNORA75, SNORA70, SNORA73, U1
2:96066817:97483384	2	96066817	97483384	1.41657	569		, GLRX, B4GALT1, SFTPC, LPL, ALDH1A1, CTSB, GULP1, ITGAV, ITM2C, U6, U4, 7SK, 5S_rRNA, SNORD82, RNase_MRP, SNORA75, SNORA70, SNORA73, U1
2:98604721:100144117	2	98604721	100144117	1.5394	569		, GLRX, B4GALT1, SFTPC, LPL, ALDH1A1, CTSB, GULP1, ITGAV, ITM2C, U6, U4, 7SK, 5S_rRNA, SNORD82, RNase_MRP, SNORA75, SNORA70, SNORA73, U1
3:107993981:115509066	3	107993981	115509066	7.51509	456		, EPCAM, URM1, AK1, PTGS1, GGTA1, MYF6, DCN, ATXN7L3B, BTG1, RAB10, HADHA, CIB4, RPS3A, PDE6H, U1, U6, 5S_rRNA, SNORA62, U2, oar-let-7b, oar-mir-181a-2, SNORD22, SNORA70
3:10951257:12128264	3	10951257	12128264	1.17701	456		, EPCAM, URM1, AK1, PTGS1, GGTA1, MYF6, DCN, ATXN7L3B, BTG1, RAB10, HADHA, CIB4, RPS3A, PDE6H, U1, U6, 5S_rRNA, SNORA62, U2, oar-let-7b, oar-mir-181a-2, SNORD22, SNORA70
3:115801342:118131192	3	115801342	118131192	2.32985	456		, EPCAM, URM1, AK1, PTGS1, GGTA1, MYF6, DCN, ATXN7L3B, BTG1, RAB10, HADHA, CIB4, RPS3A, PDE6H, U1, U6, 5S_rRNA, SNORA62, U2, oar-let-7b, oar-mir-181a-2, SNORD22, SNORA70
3:118265098:118267529	3	118265098	118267529	0.002431	456		, EPCAM, URM1, AK1, PTGS1, GGTA1, MYF6, DCN, ATXN7L3B, BTG1, RAB10, HADHA, CIB4, RPS3A, PDE6H, U1, U6, 5S_rRNA, SNORA62, U2, oar-let-7b, oar-mir-181a-2, SNORD22, SNORA70
3:12289153:14744363	3	12289153	14744363	2.45521	456		, EPCAM, URM1, AK1, PTGS1, GGTA1, MYF6, DCN, ATXN7L3B, BTG1, RAB10, HADHA, CIB4, RPS3A, PDE6H, U1, U6, 5S_rRNA, SNORA62, U2, oar-let-7b, oar-mir-181a-2, SNORD22, SNORA70
3:123173680:123689069	3	123173680	123689069	0.515389	456		, EPCAM, URM1, AK1, PTGS1, GGTA1, MYF6, DCN, ATXN7L3B, BTG1, RAB10, HADHA, CIB4, RPS3A, PDE6H, U1, U6, 5S_rRNA, SNORA62, U2, oar-let-7b, oar-mir-181a-2, SNORD22, SNORA70
3:127221039:128768226	3	127221039	128768226	1.54719	456		, EPCAM, URM1, AK1, PTGS1, GGTA1, MYF6, DCN, ATXN7L3B, BTG1, RAB10, HADHA, CIB4, RPS3A, PDE6H, U1, U6, 5S_rRNA, SNORA62, U2, oar-let-7b, oar-mir-181a-2, SNORD22, SNORA70
3:141240034:141681710	3	141240034	141681710	0.441676	456		, EPCAM, URM1, AK1, PTGS1, GGTA1, MYF6, DCN, ATXN7L3B, BTG1, RAB10, HADHA, CIB4, RPS3A, PDE6H, U1, U6, 5S_rRNA, SNORA62, U2, oar-let-7b, oar-mir-181a-2, SNORD22, SNORA70
3:144139440:146029858	3	144139440	146029858	1.89042	456		, EPCAM, URM1, AK1, PTGS1, GGTA1, MYF6, DCN, ATXN7L3B, BTG1, RAB10, HADHA, CIB4, RPS3A, PDE6H, U1, U6, 5S_rRNA, SNORA62, U2, oar-let-7b, oar-mir-181a-2, SNORD22, SNORA70
3:146255731:147128672	3	146255731	147128672	0.872941	456		, EPCAM, URM1, AK1, PTGS1, GGTA1, MYF6, DCN, ATXN7L3B, BTG1, RAB10, HADHA, CIB4, RPS3A, PDE6H, U1, U6, 5S_rRNA, SNORA62, U2, oar-let-7b, oar-mir-181a-2, SNORD22, SNORA70
3:156990710:158063561	3	156990710	158063561	1.07285	456		, EPCAM, URM1, AK1, PTGS1, GGTA1, MYF6, DCN, ATXN7L3B, BTG1, RAB10, HADHA, CIB4, RPS3A, PDE6H, U1, U6, 5S_rRNA, SNORA62, U2, oar-let-7b, oar-mir-181a-2, SNORD22, SNORA70
3:172509430:173871809	3	172509430	173871809	1.36238	456		, EPCAM, URM1, AK1, PTGS1, GGTA1, MYF6, DCN, ATXN7L3B, BTG1, RAB10, HADHA, CIB4, RPS3A, PDE6H, U1, U6, 5S_rRNA, SNORA62, U2, oar-let-7b, oar-mir-181a-2, SNORD22, SNORA70
3:174084399:174758850	3	174084399	174758850	0.674451	456		, EPCAM, URM1, AK1, PTGS1, GGTA1, MYF6, DCN, ATXN7L3B, BTG1, RAB10, HADHA, CIB4, RPS3A, PDE6H, U1, U6, 5S_rRNA, SNORA62, U2, oar-let-7b, oar-mir-181a-2, SNORD22, SNORA70
3:181081760:182544365	3	181081760	182544365	1.4626	456		, EPCAM, URM1, AK1, PTGS1, GGTA1, MYF6, DCN, ATXN7L3B, BTG1, RAB10, HADHA, CIB4, RPS3A, PDE6H, U1, U6, 5S_rRNA, SNORA62, U2, oar-let-7b, oar-mir-181a-2, SNORD22, SNORA70
3:183274836:183605277	3	183274836	183605277	0.330441	456		, EPCAM, URM1, AK1, PTGS1, GGTA1, MYF6, DCN, ATXN7L3B, BTG1, RAB10, HADHA, CIB4, RPS3A, PDE6H, U1, U6, 5S_rRNA, SNORA62, U2, oar-let-7b, oar-mir-181a-2, SNORD22, SNORA70
3:183759551:184676153	3	183759551	184676153	0.916602	456		, EPCAM, URM1, AK1, PTGS1, GGTA1, MYF6, DCN, ATXN7L3B, BTG1, RAB10, HADHA, CIB4, RPS3A, PDE6H, U1, U6, 5S_rRNA, SNORA62, U2, oar-let-7b, oar-mir-181a-2, SNORD22, SNORA70
3:192400372:192400372	3	192400372	192400372	0	456		, EPCAM, URM1, AK1, PTGS1, GGTA1, MYF6, DCN, ATXN7L3B, BTG1, RAB10, HADHA, CIB4, RPS3A, PDE6H, U1, U6, 5S_rRNA, SNORA62, U2, oar-let-7b, oar-mir-181a-2, SNORD22, SNORA70
3:196207011:198228001	3	196207011	198228001	2.02099	456		, EPCAM, URM1, AK1, PTGS1, GGTA1, MYF6, DCN, ATXN7L3B, BTG1, RAB10, HADHA, CIB4, RPS3A, PDE6H, U1, U6, 5S_rRNA, SNORA62, U2, oar-let-7b, oar-mir-181a-2, SNORD22, SNORA70
3:199675578:201077613	3	199675578	201077613	1.40203	456		, EPCAM, URM1, AK1, PTGS1, GGTA1, MYF6, DCN, ATXN7L3B, BTG1, RAB10, HADHA, CIB4, RPS3A, PDE6H, U1, U6, 5S_rRNA, SNORA62, U2, oar-let-7b, oar-mir-181a-2, SNORD22, SNORA70
3:202626827:203111437	3	202626827	203111437	0.48461	456		, EPCAM, URM1, AK1, PTGS1, GGTA1, MYF6, DCN, ATXN7L3B, BTG1, RAB10, HADHA, CIB4, RPS3A, PDE6H, U1, U6, 5S_rRNA, SNORA62, U2, oar-let-7b, oar-mir-181a-2, SNORD22, SNORA70
3:212270006:213008204	3	212270006	213008204	0.738198	456		, EPCAM, URM1, AK1, PTGS1, GGTA1, MYF6, DCN, ATXN7L3B, BTG1, RAB10, HADHA, CIB4, RPS3A, PDE6H, U1, U6, 5S_rRNA, SNORA62, U2, oar-let-7b, oar-mir-181a-2, SNORD22, SNORA70
3:220210184:221452723	3	220210184	221452723	1.24254	456		, EPCAM, URM1, AK1, PTGS1, GGTA1, MYF6, DCN, ATXN7L3B, BTG1, RAB10, HADHA, CIB4, RPS3A, PDE6H, U1, U6, 5S_rRNA, SNORA62, U2, oar-let-7b, oar-mir-181a-2, SNORD22, SNORA70
3:230630605:230767093	3	230630605	230767093	0.136488	456		, EPCAM, URM1, AK1, PTGS1, GGTA1, MYF6, DCN, ATXN7L3B, BTG1, RAB10, HADHA, CIB4, RPS3A, PDE6H, U1, U6, 5S_rRNA, SNORA62, U2, oar-let-7b, oar-mir-181a-2, SNORD22, SNORA70
3:230972534:231655139	3	230972534	231655139	0.682605	456		, EPCAM, URM1, AK1, PTGS1, GGTA1, MYF6, DCN, ATXN7L3B, BTG1, RAB10, HADHA, CIB4, RPS3A, PDE6H, U1, U6, 5S_rRNA, SNORA62, U2, oar-let-7b, oar-mir-181a-2, SNORD22, SNORA70
3:234093456:235131649	3	234093456	235131649	1.03819	456		, EPCAM, URM1, AK1, PTGS1, GGTA1, MYF6, DCN, ATXN7L3B, BTG1, RAB10, HADHA, CIB4, RPS3A, PDE6H, U1, U6, 5S_rRNA, SNORA62, U2, oar-let-7b, oar-mir-181a-2, SNORD22, SNORA70
3:237244033:239216984	3	237244033	239216984	1.97295	456		, EPCAM, URM1, AK1, PTGS1, GGTA1, MYF6, DCN, ATXN7L3B, BTG1, RAB10, HADHA, CIB4, RPS3A, PDE6H, U1, U6, 5S_rRNA, SNORA62, U2, oar-let-7b, oar-mir-181a-2, SNORD22, SNORA70
3:239327589:239327589	3	239327589	239327589	0	456		, EPCAM, URM1, AK1, PTGS1, GGTA1, MYF6, DCN, ATXN7L3B, BTG1, RAB10, HADHA, CIB4, RPS3A, PDE6H, U1, U6, 5S_rRNA, SNORA62, U2, oar-let-7b, oar-mir-181a-2, SNORD22, SNORA70
3:28820106:29476534	3	28820106	29476534	0.656428	456		, EPCAM, URM1, AK1, PTGS1, GGTA1, MYF6, DCN, ATXN7L3B, BTG1, RAB10, HADHA, CIB4, RPS3A, PDE6H, U1, U6, 5S_rRNA, SNORA62, U2, oar-let-7b, oar-mir-181a-2, SNORD22, SNORA70
3:29563591:29820633	3	29563591	29820633	0.257042	456		, EPCAM, URM1, AK1, PTGS1, GGTA1, MYF6, DCN, ATXN7L3B, BTG1, RAB10, HADHA, CIB4, RPS3A, PDE6H, U1, U6, 5S_rRNA, SNORA62, U2, oar-let-7b, oar-mir-181a-2, SNORD22, SNORA70
3:30086720:30086720	3	30086720	30086720	0	456		, EPCAM, URM1, AK1, PTGS1, GGTA1, MYF6, DCN, ATXN7L3B, BTG1, RAB10, HADHA, CIB4, RPS3A, PDE6H, U1, U6, 5S_rRNA, SNORA62, U2, oar-let-7b, oar-mir-181a-2, SNORD22, SNORA70
3:33169641:34558749	3	33169641	34558749	1.38911	456		, EPCAM, URM1, AK1, PTGS1, GGTA1, MYF6, DCN, ATXN7L3B, BTG1, RAB10, HADHA, CIB4, RPS3A, PDE6H, U1, U6, 5S_rRNA, SNORA62, U2, oar-let-7b, oar-mir-181a-2, SNORD22, SNORA70
3:45852219:45852219	3	45852219	45852219	0	456		, EPCAM, URM1, AK1, PTGS1, GGTA1, MYF6, DCN, ATXN7L3B, BTG1, RAB10, HADHA, CIB4, RPS3A, PDE6H, U1, U6, 5S_rRNA, SNORA62, U2, oar-let-7b, oar-mir-181a-2, SNORD22, SNORA70
3:46132071:46846114	3	46132071	46846114	0.714043	456		, EPCAM, URM1, AK1, PTGS1, GGTA1, MYF6, DCN, ATXN7L3B, BTG1, RAB10, HADHA, CIB4, RPS3A, PDE6H, U1, U6, 5S_rRNA, SNORA62, U2, oar-let-7b, oar-mir-181a-2, SNORD22, SNORA70
3:47268408:47351324	3	47268408	47351324	0.082916	456		, EPCAM, URM1, AK1, PTGS1, GGTA1, MYF6, DCN, ATXN7L3B, BTG1, RAB10, HADHA, CIB4, RPS3A, PDE6H, U1, U6, 5S_rRNA, SNORA62, U2, oar-let-7b, oar-mir-181a-2, SNORD22, SNORA70
3:47522402:50288433	3	47522402	50288433	2.76603	456		, EPCAM, URM1, AK1, PTGS1, GGTA1, MYF6, DCN, ATXN7L3B, BTG1, RAB10, HADHA, CIB4, RPS3A, PDE6H, U1, U6, 5S_rRNA, SNORA62, U2, oar-let-7b, oar-mir-181a-2, SNORD22, SNORA70
3:55514616:55690836	3	55514616	55690836	0.17622	456		, EPCAM, URM1, AK1, PTGS1, GGTA1, MYF6, DCN, ATXN7L3B, BTG1, RAB10, HADHA, CIB4, RPS3A, PDE6H, U1, U6, 5S_rRNA, SNORA62, U2, oar-let-7b, oar-mir-181a-2, SNORD22, SNORA70
3:60557550:60617153	3	60557550	60617153	0.059603	456		, EPCAM, URM1, AK1, PTGS1, GGTA1, MYF6, DCN, ATXN7L3B, BTG1, RAB10, HADHA, CIB4, RPS3A, PDE6H, U1, U6, 5S_rRNA, SNORA62, U2, oar-let-7b, oar-mir-181a-2, SNORD22, SNORA70
3:60954645:61611098	3	60954645	61611098	0.656453	456		, EPCAM, URM1, AK1, PTGS1, GGTA1, MYF6, DCN, ATXN7L3B, BTG1, RAB10, HADHA, CIB4, RPS3A, PDE6H, U1, U6, 5S_rRNA, SNORA62, U2, oar-let-7b, oar-mir-181a-2, SNORD22, SNORA70
3:61737307:61831158	3	61737307	61831158	0.093851	456		, EPCAM, URM1, AK1, PTGS1, GGTA1, MYF6, DCN, ATXN7L3B, BTG1, RAB10, HADHA, CIB4, RPS3A, PDE6H, U1, U6, 5S_rRNA, SNORA62, U2, oar-let-7b, oar-mir-181a-2, SNORD22, SNORA70
3:65301366:66172205	3	65301366	66172205	0.870839	456		, EPCAM, URM1, AK1, PTGS1, GGTA1, MYF6, DCN, ATXN7L3B, BTG1, RAB10, HADHA, CIB4, RPS3A, PDE6H, U1, U6, 5S_rRNA, SNORA62, U2, oar-let-7b, oar-mir-181a-2, SNORD22, SNORA70
3:7215699:9433006	3	7215699	9433006	2.21731	456		, EPCAM, URM1, AK1, PTGS1, GGTA1, MYF6, DCN, ATXN7L3B, BTG1, RAB10, HADHA, CIB4, RPS3A, PDE6H, U1, U6, 5S_rRNA, SNORA62, U2, oar-let-7b, oar-mir-181a-2, SNORD22, SNORA70
3:75600301:76914655	3	75600301	76914655	1.31435	456		, EPCAM, URM1, AK1, PTGS1, GGTA1, MYF6, DCN, ATXN7L3B, BTG1, RAB10, HADHA, CIB4, RPS3A, PDE6H, U1, U6, 5S_rRNA, SNORA62, U2, oar-let-7b, oar-mir-181a-2, SNORD22, SNORA70
3:93813363:95014619	3	93813363	95014619	1.20126	456		, EPCAM, URM1, AK1, PTGS1, GGTA1, MYF6, DCN, ATXN7L3B, BTG1, RAB10, HADHA, CIB4, RPS3A, PDE6H, U1, U6, 5S_rRNA, SNORA62, U2, oar-let-7b, oar-mir-181a-2, SNORD22, SNORA70
4:106656483:107362112	4	106656483	107362112	0.705629	244	RELN	RELN, , PEG10, PON2, SLC26A3, NPVF, SRI, 5S_rRNA, U6, oar-mir-148a, 7SK, SNORD82, SNORA70
4:107537251:108992572	4	107537251	108992572	1.45532	244	RELN	RELN, , PEG10, PON2, SLC26A3, NPVF, SRI, 5S_rRNA, U6, oar-mir-148a, 7SK, SNORD82, SNORA70
4:11475100:12537834	4	11475100	12537834	1.06273	244	RELN	RELN, , PEG10, PON2, SLC26A3, NPVF, SRI, 5S_rRNA, U6, oar-mir-148a, 7SK, SNORD82, SNORA70
4:119056617:122554922	4	119056617	122554922	3.49831	244	RELN	RELN, , PEG10, PON2, SLC26A3, NPVF, SRI, 5S_rRNA, U6, oar-mir-148a, 7SK, SNORD82, SNORA70
4:125052418:125384314	4	125052418	125384314	0.331896	244	RELN	RELN, , PEG10, PON2, SLC26A3, NPVF, SRI, 5S_rRNA, U6, oar-mir-148a, 7SK, SNORD82, SNORA70
4:13344864:15247151	4	13344864	15247151	1.90229	244	RELN	RELN, , PEG10, PON2, SLC26A3, NPVF, SRI, 5S_rRNA, U6, oar-mir-148a, 7SK, SNORD82, SNORA70
4:17019083:18596826	4	17019083	18596826	1.57774	244	RELN	RELN, , PEG10, PON2, SLC26A3, NPVF, SRI, 5S_rRNA, U6, oar-mir-148a, 7SK, SNORD82, SNORA70
4:19944714:20451557	4	19944714	20451557	0.506843	244	RELN	RELN, , PEG10, PON2, SLC26A3, NPVF, SRI, 5S_rRNA, U6, oar-mir-148a, 7SK, SNORD82, SNORA70
4:250093:4017000	4	250093	4017000	3.76691	244	RELN	RELN, , PEG10, PON2, SLC26A3, NPVF, SRI, 5S_rRNA, U6, oar-mir-148a, 7SK, SNORD82, SNORA70
4:28053934:28053934	4	28053934	28053934	0	244	RELN	RELN, , PEG10, PON2, SLC26A3, NPVF, SRI, 5S_rRNA, U6, oar-mir-148a, 7SK, SNORD82, SNORA70
4:34337384:34337384	4	34337384	34337384	0	244	RELN	RELN, , PEG10, PON2, SLC26A3, NPVF, SRI, 5S_rRNA, U6, oar-mir-148a, 7SK, SNORD82, SNORA70
4:34406723:35430985	4	34406723	35430985	1.02426	244	RELN	RELN, , PEG10, PON2, SLC26A3, NPVF, SRI, 5S_rRNA, U6, oar-mir-148a, 7SK, SNORD82, SNORA70
4:36649135:37874880	4	36649135	37874880	1.22575	244	RELN	RELN, , PEG10, PON2, SLC26A3, NPVF, SRI, 5S_rRNA, U6, oar-mir-148a, 7SK, SNORD82, SNORA70
4:37992712:38627507	4	37992712	38627507	0.634795	244	RELN	RELN, , PEG10, PON2, SLC26A3, NPVF, SRI, 5S_rRNA, U6, oar-mir-148a, 7SK, SNORD82, SNORA70
4:40562612:40634758	4	40562612	40634758	0.072146	244	RELN	RELN, , PEG10, PON2, SLC26A3, NPVF, SRI, 5S_rRNA, U6, oar-mir-148a, 7SK, SNORD82, SNORA70
4:42610251:46797402	4	42610251	46797402	4.18715	244	RELN	RELN, , PEG10, PON2, SLC26A3, NPVF, SRI, 5S_rRNA, U6, oar-mir-148a, 7SK, SNORD82, SNORA70
4:47136262:47332566	4	47136262	47332566	0.196304	244	RELN	RELN, , PEG10, PON2, SLC26A3, NPVF, SRI, 5S_rRNA, U6, oar-mir-148a, 7SK, SNORD82, SNORA70
4:47474498:49698147	4	47474498	49698147	2.22365	244	RELN	RELN, , PEG10, PON2, SLC26A3, NPVF, SRI, 5S_rRNA, U6, oar-mir-148a, 7SK, SNORD82, SNORA70
4:54024801:55432289	4	54024801	55432289	1.40749	244	RELN	RELN, , PEG10, PON2, SLC26A3, NPVF, SRI, 5S_rRNA, U6, oar-mir-148a, 7SK, SNORD82, SNORA70
4:56790287:57757751	4	56790287	57757751	0.967464	244	RELN	RELN, , PEG10, PON2, SLC26A3, NPVF, SRI, 5S_rRNA, U6, oar-mir-148a, 7SK, SNORD82, SNORA70
4:69946472:70003684	4	69946472	70003684	0.057212	244	RELN	RELN, , PEG10, PON2, SLC26A3, NPVF, SRI, 5S_rRNA, U6, oar-mir-148a, 7SK, SNORD82, SNORA70
4:70665707:71010089	4	70665707	71010089	0.344382	244	RELN	RELN, , PEG10, PON2, SLC26A3, NPVF, SRI, 5S_rRNA, U6, oar-mir-148a, 7SK, SNORD82, SNORA70
4:71955812:74070157	4	71955812	74070157	2.11435	244	RELN	RELN, , PEG10, PON2, SLC26A3, NPVF, SRI, 5S_rRNA, U6, oar-mir-148a, 7SK, SNORD82, SNORA70
4:7690026:7760661	4	7690026	7760661	0.070635	244	RELN	RELN, , PEG10, PON2, SLC26A3, NPVF, SRI, 5S_rRNA, U6, oar-mir-148a, 7SK, SNORD82, SNORA70
4:7909316:10178176	4	7909316	10178176	2.26886	244	RELN	RELN, , PEG10, PON2, SLC26A3, NPVF, SRI, 5S_rRNA, U6, oar-mir-148a, 7SK, SNORD82, SNORA70
4:98203380:100352784	4	98203380	100352784	2.1494	244	RELN	RELN, , PEG10, PON2, SLC26A3, NPVF, SRI, 5S_rRNA, U6, oar-mir-148a, 7SK, SNORD82, SNORA70
5:113069449:113540494	5	113069449	113540494	0.471045	241		, NR3C1, SCGB3A2, ZNF333, PLIN5, GDF9, TXNDC15, FBXL21P, MEF2C, SLC12A2, U6, Vault, 7SK, 5S_rRNA
5:16396092:16644304	5	16396092	16644304	0.248212	241		, NR3C1, SCGB3A2, ZNF333, PLIN5, GDF9, TXNDC15, FBXL21P, MEF2C, SLC12A2, U6, Vault, 7SK, 5S_rRNA
5:16933243:17353987	5	16933243	17353987	0.420744	241		, NR3C1, SCGB3A2, ZNF333, PLIN5, GDF9, TXNDC15, FBXL21P, MEF2C, SLC12A2, U6, Vault, 7SK, 5S_rRNA
5:20504107:21481268	5	20504107	21481268	0.977161	241		, NR3C1, SCGB3A2, ZNF333, PLIN5, GDF9, TXNDC15, FBXL21P, MEF2C, SLC12A2, U6, Vault, 7SK, 5S_rRNA
5:22019775:23544659	5	22019775	23544659	1.52488	241		, NR3C1, SCGB3A2, ZNF333, PLIN5, GDF9, TXNDC15, FBXL21P, MEF2C, SLC12A2, U6, Vault, 7SK, 5S_rRNA
5:39106266:40204027	5	39106266	40204027	1.09776	241		, NR3C1, SCGB3A2, ZNF333, PLIN5, GDF9, TXNDC15, FBXL21P, MEF2C, SLC12A2, U6, Vault, 7SK, 5S_rRNA
5:41414053:42829447	5	41414053	42829447	1.41539	241		, NR3C1, SCGB3A2, ZNF333, PLIN5, GDF9, TXNDC15, FBXL21P, MEF2C, SLC12A2, U6, Vault, 7SK, 5S_rRNA
5:43591342:43591342	5	43591342	43591342	0	241		, NR3C1, SCGB3A2, ZNF333, PLIN5, GDF9, TXNDC15, FBXL21P, MEF2C, SLC12A2, U6, Vault, 7SK, 5S_rRNA
5:43731258:46462528	5	43731258	46462528	2.73127	241		, NR3C1, SCGB3A2, ZNF333, PLIN5, GDF9, TXNDC15, FBXL21P, MEF2C, SLC12A2, U6, Vault, 7SK, 5S_rRNA
5:50583611:53543443	5	50583611	53543443	2.95983	241		, NR3C1, SCGB3A2, ZNF333, PLIN5, GDF9, TXNDC15, FBXL21P, MEF2C, SLC12A2, U6, Vault, 7SK, 5S_rRNA
5:53656408:54587814	5	53656408	54587814	0.931406	241		, NR3C1, SCGB3A2, ZNF333, PLIN5, GDF9, TXNDC15, FBXL21P, MEF2C, SLC12A2, U6, Vault, 7SK, 5S_rRNA
5:55892102:56508083	5	55892102	56508083	0.615981	241		, NR3C1, SCGB3A2, ZNF333, PLIN5, GDF9, TXNDC15, FBXL21P, MEF2C, SLC12A2, U6, Vault, 7SK, 5S_rRNA
5:7488518:9326383	5	7488518	9326383	1.83787	241		, NR3C1, SCGB3A2, ZNF333, PLIN5, GDF9, TXNDC15, FBXL21P, MEF2C, SLC12A2, U6, Vault, 7SK, 5S_rRNA
5:78429370:79432898	5	78429370	79432898	1.00353	241		, NR3C1, SCGB3A2, ZNF333, PLIN5, GDF9, TXNDC15, FBXL21P, MEF2C, SLC12A2, U6, Vault, 7SK, 5S_rRNA
5:85392495:86609751	5	85392495	86609751	1.21726	241		, NR3C1, SCGB3A2, ZNF333, PLIN5, GDF9, TXNDC15, FBXL21P, MEF2C, SLC12A2, U6, Vault, 7SK, 5S_rRNA
5:89657614:91593143	5	89657614	91593143	1.93553	241		, NR3C1, SCGB3A2, ZNF333, PLIN5, GDF9, TXNDC15, FBXL21P, MEF2C, SLC12A2, U6, Vault, 7SK, 5S_rRNA
6:103500682:104330233	6	103500682	104330233	0.829551	147	RHOH	RHOH, , KDR, CLOCK, CSN1S1, CSN2, CSN1S2, CSN3, CXCL8, CXCL1, RCHY1, SNORD42, 7SK, U6, 5S_rRNA, U1
6:105739802:105936918	6	105739802	105936918	0.197116	147	RHOH	RHOH, , KDR, CLOCK, CSN1S1, CSN2, CSN1S2, CSN3, CXCL8, CXCL1, RCHY1, SNORD42, 7SK, U6, 5S_rRNA, U1
6:121181023:121490131	6	121181023	121490131	0.309108	147	RHOH	RHOH, , KDR, CLOCK, CSN1S1, CSN2, CSN1S2, CSN3, CXCL8, CXCL1, RCHY1, SNORD42, 7SK, U6, 5S_rRNA, U1
6:26834467:27453553	6	26834467	27453553	0.619086	147	RHOH	RHOH, , KDR, CLOCK, CSN1S1, CSN2, CSN1S2, CSN3, CXCL8, CXCL1, RCHY1, SNORD42, 7SK, U6, 5S_rRNA, U1
6:30615134:31740833	6	30615134	31740833	1.1257	147	RHOH	RHOH, , KDR, CLOCK, CSN1S1, CSN2, CSN1S2, CSN3, CXCL8, CXCL1, RCHY1, SNORD42, 7SK, U6, 5S_rRNA, U1
6:40570462:42247197	6	40570462	42247197	1.67674	147	RHOH	RHOH, , KDR, CLOCK, CSN1S1, CSN2, CSN1S2, CSN3, CXCL8, CXCL1, RCHY1, SNORD42, 7SK, U6, 5S_rRNA, U1
6:49538566:50662300	6	49538566	50662300	1.12373	147	RHOH	RHOH, , KDR, CLOCK, CSN1S1, CSN2, CSN1S2, CSN3, CXCL8, CXCL1, RCHY1, SNORD42, 7SK, U6, 5S_rRNA, U1
6:56456988:57356461	6	56456988	57356461	0.899473	147	RHOH	RHOH, , KDR, CLOCK, CSN1S1, CSN2, CSN1S2, CSN3, CXCL8, CXCL1, RCHY1, SNORD42, 7SK, U6, 5S_rRNA, U1
6:58751558:61019736	6	58751558	61019736	2.26818	147	RHOH	RHOH, , KDR, CLOCK, CSN1S1, CSN2, CSN1S2, CSN3, CXCL8, CXCL1, RCHY1, SNORD42, 7SK, U6, 5S_rRNA, U1
6:70707288:70913564	6	70707288	70913564	0.206276	147	RHOH	RHOH, , KDR, CLOCK, CSN1S1, CSN2, CSN1S2, CSN3, CXCL8, CXCL1, RCHY1, SNORD42, 7SK, U6, 5S_rRNA, U1
6:81057547:83210145	6	81057547	83210145	2.1526	147	RHOH	RHOH, , KDR, CLOCK, CSN1S1, CSN2, CSN1S2, CSN3, CXCL8, CXCL1, RCHY1, SNORD42, 7SK, U6, 5S_rRNA, U1
6:84581840:87967742	6	84581840	87967742	3.3859	147	RHOH	RHOH, , KDR, CLOCK, CSN1S1, CSN2, CSN1S2, CSN3, CXCL8, CXCL1, RCHY1, SNORD42, 7SK, U6, 5S_rRNA, U1
6:88424920:90403591	6	88424920	90403591	1.97867	147	RHOH	RHOH, , KDR, CLOCK, CSN1S1, CSN2, CSN1S2, CSN3, CXCL8, CXCL1, RCHY1, SNORD42, 7SK, U6, 5S_rRNA, U1
6:91292213:91351053	6	91292213	91351053	0.05884	147	RHOH	RHOH, , KDR, CLOCK, CSN1S1, CSN2, CSN1S2, CSN3, CXCL8, CXCL1, RCHY1, SNORD42, 7SK, U6, 5S_rRNA, U1
6:91476645:92913514	6	91476645	92913514	1.43687	147	RHOH	RHOH, , KDR, CLOCK, CSN1S1, CSN2, CSN1S2, CSN3, CXCL8, CXCL1, RCHY1, SNORD42, 7SK, U6, 5S_rRNA, U1
7:20144104:20144104	7	20144104	20144104	0	265		, GSTA1, SLC39A2, DUOX2, BMP4, SIX6, SIX1, U6, 5S_rRNA, U7, U2, Metazoa_SRP, 7SK
7:22824413:23786140	7	22824413	23786140	0.961727	265		, GSTA1, SLC39A2, DUOX2, BMP4, SIX6, SIX1, U6, 5S_rRNA, U7, U2, Metazoa_SRP, 7SK
7:36584805:39756501	7	36584805	39756501	3.1717	265		, GSTA1, SLC39A2, DUOX2, BMP4, SIX6, SIX1, U6, 5S_rRNA, U7, U2, Metazoa_SRP, 7SK
7:47709030:49022113	7	47709030	49022113	1.31308	265		, GSTA1, SLC39A2, DUOX2, BMP4, SIX6, SIX1, U6, 5S_rRNA, U7, U2, Metazoa_SRP, 7SK
7:51856800:55877530	7	51856800	55877530	4.02073	265		, GSTA1, SLC39A2, DUOX2, BMP4, SIX6, SIX1, U6, 5S_rRNA, U7, U2, Metazoa_SRP, 7SK
7:59964432:64620807	7	59964432	64620807	4.65637	265		, GSTA1, SLC39A2, DUOX2, BMP4, SIX6, SIX1, U6, 5S_rRNA, U7, U2, Metazoa_SRP, 7SK
7:68675072:70844398	7	68675072	70844398	2.16933	265		, GSTA1, SLC39A2, DUOX2, BMP4, SIX6, SIX1, U6, 5S_rRNA, U7, U2, Metazoa_SRP, 7SK
7:74573027:75710157	7	74573027	75710157	1.13713	265		, GSTA1, SLC39A2, DUOX2, BMP4, SIX6, SIX1, U6, 5S_rRNA, U7, U2, Metazoa_SRP, 7SK
7:78083739:79153222	7	78083739	79153222	1.06948	265		, GSTA1, SLC39A2, DUOX2, BMP4, SIX6, SIX1, U6, 5S_rRNA, U7, U2, Metazoa_SRP, 7SK
7:81898664:83073383	7	81898664	83073383	1.17472	265		, GSTA1, SLC39A2, DUOX2, BMP4, SIX6, SIX1, U6, 5S_rRNA, U7, U2, Metazoa_SRP, 7SK
7:96701449:98503397	7	96701449	98503397	1.80195	265		, GSTA1, SLC39A2, DUOX2, BMP4, SIX6, SIX1, U6, 5S_rRNA, U7, U2, Metazoa_SRP, 7SK
8:11646058:13099559	8	11646058	13099559	1.4535	32		, 5S_rRNA, 7SK
8:13170152:14387393	8	13170152	14387393	1.21724	32		, 5S_rRNA, 7SK
8:23294661:24000338	8	23294661	24000338	0.705677	32		, 5S_rRNA, 7SK
8:33985174:34033040	8	33985174	34033040	0.047866	32		, 5S_rRNA, 7SK
8:34350484:35284147	8	34350484	35284147	0.933663	32		, 5S_rRNA, 7SK
8:45792562:47169794	8	45792562	47169794	1.37723	32		, 5S_rRNA, 7SK
8:637947:1330354	8	637947	1330354	0.692407	32		, 5S_rRNA, 7SK
8:78995634:79747163	8	78995634	79747163	0.751529	32		, 5S_rRNA, 7SK
8:8128137:9335871	8	8128137	9335871	1.20773	32		, 5S_rRNA, 7SK
8:95898334:96932113	8	95898334	96932113	1.03378	32		, 5S_rRNA, 7SK
9:26047884:26279684	9	26047884	26279684	0.2318	140		, SNAI2, KCNS2, U6, 5S_rRNA, SNORA72, SNORA70
9:26470844:27281078	9	26470844	27281078	0.810234	140		, SNAI2, KCNS2, U6, 5S_rRNA, SNORA72, SNORA70
9:29721272:32726527	9	29721272	32726527	3.00526	140		, SNAI2, KCNS2, U6, 5S_rRNA, SNORA72, SNORA70
9:3164827:3636492	9	3164827	3636492	0.471665	140		, SNAI2, KCNS2, U6, 5S_rRNA, SNORA72, SNORA70
9:37474056:39501281	9	37474056	39501281	2.02723	140		, SNAI2, KCNS2, U6, 5S_rRNA, SNORA72, SNORA70
9:3906365:3981962	9	3906365	3981962	0.075597	140		, SNAI2, KCNS2, U6, 5S_rRNA, SNORA72, SNORA70
9:41071934:41445839	9	41071934	41445839	0.373905	140		, SNAI2, KCNS2, U6, 5S_rRNA, SNORA72, SNORA70
9:45719676:46870740	9	45719676	46870740	1.15106	140		, SNAI2, KCNS2, U6, 5S_rRNA, SNORA72, SNORA70
9:46923137:46983424	9	46923137	46983424	0.060287	140		, SNAI2, KCNS2, U6, 5S_rRNA, SNORA72, SNORA70
9:47018997:47118660	9	47018997	47118660	0.099663	140		, SNAI2, KCNS2, U6, 5S_rRNA, SNORA72, SNORA70
9:49401772:49715185	9	49401772	49715185	0.313413	140		, SNAI2, KCNS2, U6, 5S_rRNA, SNORA72, SNORA70
9:50008246:50008246	9	50008246	50008246	0	140		, SNAI2, KCNS2, U6, 5S_rRNA, SNORA72, SNORA70
9:62920249:64033037	9	62920249	64033037	1.11279	140		, SNAI2, KCNS2, U6, 5S_rRNA, SNORA72, SNORA70
9:64551132:65327430	9	64551132	65327430	0.776298	140		, SNAI2, KCNS2, U6, 5S_rRNA, SNORA72, SNORA70
9:66218531:67336436	9	66218531	67336436	1.1179	140		, SNAI2, KCNS2, U6, 5S_rRNA, SNORA72, SNORA70
9:6641948:6830102	9	6641948	6830102	0.188154	140		, SNAI2, KCNS2, U6, 5S_rRNA, SNORA72, SNORA70
9:6883350:11876820	9	6883350	11876820	4.99347	140		, SNAI2, KCNS2, U6, 5S_rRNA, SNORA72, SNORA70
9:69315508:70487006	9	69315508	70487006	1.1715	140		, SNAI2, KCNS2, U6, 5S_rRNA, SNORA72, SNORA70
9:72243672:73903301	9	72243672	73903301	1.65963	140		, SNAI2, KCNS2, U6, 5S_rRNA, SNORA72, SNORA70
9:78462921:78494265	9	78462921	78494265	0.031344	140		, SNAI2, KCNS2, U6, 5S_rRNA, SNORA72, SNORA70
9:78551189:78601117	9	78551189	78601117	0.049928	140		, SNAI2, KCNS2, U6, 5S_rRNA, SNORA72, SNORA70
9:78706489:79084469	9	78706489	79084469	0.37798	140		, SNAI2, KCNS2, U6, 5S_rRNA, SNORA72, SNORA70
9:81249194:82968223	9	81249194	82968223	1.71903	140		, SNAI2, KCNS2, U6, 5S_rRNA, SNORA72, SNORA70
9:90345734:91236055	9	90345734	91236055	0.890321	140		, SNAI2, KCNS2, U6, 5S_rRNA, SNORA72, SNORA70
9:95284529:95394319	9	95284529	95394319	0.10979	140		, SNAI2, KCNS2, U6, 5S_rRNA, SNORA72, SNORA70
9:97310214:97426560	9	97310214	97426560	0.116346	140		, SNAI2, KCNS2, U6, 5S_rRNA, SNORA72, SNORA70
