# Supplementary material for: Comparative Detection of Selection Signatures in Indigenous and Crossbred Turkish Sheep Breeds
Source: Research Square preprint supplement (doi:10.21203/rs.3.rs-7364156/v1), 2025-09-09
Supplement: Supplementary file 3 [file 3ccf2d10971721cbd9ec16a9.xlsx]

## Sheet: Sheet1
	Table S9. Signatures of selection detected by iHS in Karacabey
Region	Chr	Start	Stop	Size_Mb	No_of_genes	Peak_gene	Genes
20:20500000:2.1e+08	20	20500000	210000000	189.5	516		, U6, CRISP3, 7SK, DQA, HSPA1A, CSNK2B, TNF, SNORD83, ATAT1, Metazoa_SRP, GPX5, PRP2, UBE2N, PRL, 5S_rRNA, GMPR, DTNBP1, EDN1, TFAP2A, U1, SERPINB1
20:3.1e+08:31500000	20	310000000	31500000	-278.5	516		, U6, CRISP3, 7SK, DQA, HSPA1A, CSNK2B, TNF, SNORD83, ATAT1, Metazoa_SRP, GPX5, PRP2, UBE2N, PRL, 5S_rRNA, GMPR, DTNBP1, EDN1, TFAP2A, U1, SERPINB1
23:19500000:2e+07	23	19500000	20000000	0.5	2
24:2.3e+08:23500000	24	230000000	23500000	-206.5	1		NA
2:34500000:3.5e+08	2	34500000	350000000	315.5	1702		, UBQLN1, U6, U1, B4GALT1, 5S_rRNA, SFTPC, U4, LPL, 7SK, SNORA70, RNase_MRP, Metazoa_SRP, RORB, ALDH1A1, ZFAND5, TYRP1, NFIB, PSIP1, RRAGA, PLIN2, NDUFB6, CTSB, GLRX, MSTN, OSGEPL1, GULP1, ITGAV, U8, oar-mir-10b, GCG, ITGB6, U12, U2, ARL5A, ACVR2A, KYNU, CXCR4, DARS1, STAT1, PPIL3, NIF3L1, BMPR2, CD28, CTLA4, snoZ196, IDH1, IGFBP5, SLC11A1, oar-mir-26b, PRKAG3, TUBA4A, SNORD39, INHA, ITM2C, SNORA…
2:43500000:4.4e+08	2	43500000	440000000	396.5	1702		, UBQLN1, U6, U1, B4GALT1, 5S_rRNA, SFTPC, U4, LPL, 7SK, SNORA70, RNase_MRP, Metazoa_SRP, RORB, ALDH1A1, ZFAND5, TYRP1, NFIB, PSIP1, RRAGA, PLIN2, NDUFB6, CTSB, GLRX, MSTN, OSGEPL1, GULP1, ITGAV, U8, oar-mir-10b, GCG, ITGB6, U12, U2, ARL5A, ACVR2A, KYNU, CXCR4, DARS1, STAT1, PPIL3, NIF3L1, BMPR2, CD28, CTLA4, snoZ196, IDH1, IGFBP5, SLC11A1, oar-mir-26b, PRKAG3, TUBA4A, SNORD39, INHA, ITM2C, SNORA…
2:48500000:4.9e+08	2	48500000	490000000	441.5	1702		, UBQLN1, U6, U1, B4GALT1, 5S_rRNA, SFTPC, U4, LPL, 7SK, SNORA70, RNase_MRP, Metazoa_SRP, RORB, ALDH1A1, ZFAND5, TYRP1, NFIB, PSIP1, RRAGA, PLIN2, NDUFB6, CTSB, GLRX, MSTN, OSGEPL1, GULP1, ITGAV, U8, oar-mir-10b, GCG, ITGB6, U12, U2, ARL5A, ACVR2A, KYNU, CXCR4, DARS1, STAT1, PPIL3, NIF3L1, BMPR2, CD28, CTLA4, snoZ196, IDH1, IGFBP5, SLC11A1, oar-mir-26b, PRKAG3, TUBA4A, SNORD39, INHA, ITM2C, SNORA…
2:5.1e+08:51500000	2	510000000	51500000	-458.5	1702		, UBQLN1, U6, U1, B4GALT1, 5S_rRNA, SFTPC, U4, LPL, 7SK, SNORA70, RNase_MRP, Metazoa_SRP, RORB, ALDH1A1, ZFAND5, TYRP1, NFIB, PSIP1, RRAGA, PLIN2, NDUFB6, CTSB, GLRX, MSTN, OSGEPL1, GULP1, ITGAV, U8, oar-mir-10b, GCG, ITGB6, U12, U2, ARL5A, ACVR2A, KYNU, CXCR4, DARS1, STAT1, PPIL3, NIF3L1, BMPR2, CD28, CTLA4, snoZ196, IDH1, IGFBP5, SLC11A1, oar-mir-26b, PRKAG3, TUBA4A, SNORD39, INHA, ITM2C, SNORA…
2:52500000:5.3e+08	2	52500000	530000000	477.5	1702		, UBQLN1, U6, U1, B4GALT1, 5S_rRNA, SFTPC, U4, LPL, 7SK, SNORA70, RNase_MRP, Metazoa_SRP, RORB, ALDH1A1, ZFAND5, TYRP1, NFIB, PSIP1, RRAGA, PLIN2, NDUFB6, CTSB, GLRX, MSTN, OSGEPL1, GULP1, ITGAV, U8, oar-mir-10b, GCG, ITGB6, U12, U2, ARL5A, ACVR2A, KYNU, CXCR4, DARS1, STAT1, PPIL3, NIF3L1, BMPR2, CD28, CTLA4, snoZ196, IDH1, IGFBP5, SLC11A1, oar-mir-26b, PRKAG3, TUBA4A, SNORD39, INHA, ITM2C, SNORA…
