# Supplementary material for: Comparative Detection of Selection Signatures in Indigenous and Crossbred Turkish Sheep Breeds
Source: Research Square preprint supplement (doi:10.21203/rs.3.rs-7364156/v1), 2025-09-09
Supplement: Supplementary file 4 [file 7d3f37e7587ac83ef207ddd1.xlsx]

## Sheet: Sheet1
	Table S5. Signatures of selection detected by ROH in Oamer
Region	Chr	Start	Stop	Size_Mb	No_of_genes	Peak_gene	Genes
10:33375417:33873964	10	33375417	33873964	0.498547	30		, oar-mir-17, U6, oar-mir-19b
10:41555331:43126887	10	41555331	43126887	1.57156	30		, oar-mir-17, U6, oar-mir-19b
10:60481062:62236757	10	60481062	62236757	1.7557	30		, oar-mir-17, U6, oar-mir-19b
10:66269009:67476305	10	66269009	67476305	1.2073	30		, oar-mir-17, U6, oar-mir-19b
10:89244748:90168545	10	89244748	90168545	0.923797	30		, oar-mir-17, U6, oar-mir-19b
11:42641540:44386934	11	42641540	44386934	1.74539	94		, PRKAR1A, U2, U6, 5S_rRNA
11:60712760:61945079	11	60712760	61945079	1.23232	94		, PRKAR1A, U2, U6, 5S_rRNA
12:40601841:41669392	12	40601841	41669392	1.06755	33		, MTOR, PGD, CORT
12:58405820:59322755	12	58405820	59322755	0.916935	33		, MTOR, PGD, CORT
13:67900809:68311181	13	67900809	68311181	0.410372	13
13:68913658:68973824	13	68913658	68973824	0.060166	13
13:78531185:79655338	13	78531185	79655338	1.12415	13
13:85099337:85745498	13	85099337	85745498	0.646161	13
13:87444196:88450452	13	87444196	88450452	1.00626	13
14:23587665:24485107	14	23587665	24485107	0.897442	40		, MT3, MT4, U6
14:29062455:29878069	14	29062455	29878069	0.815614	40		, MT3, MT4, U6
14:35476626:36642947	14	35476626	36642947	1.16632	40		, MT3, MT4, U6
15:30354769:30942870	15	30354769	30942870	0.588101	16		, U6
15:31025132:31025132	15	31025132	31025132	0	16		, U6
15:56256529:56256529	15	56256529	56256529	0	16		, U6
15:73074842:73507733	15	73074842	73507733	0.432891	16		, U6
15:87133589:88995513	15	87133589	88995513	1.86192	16		, U6
16:69803312:70886929	16	69803312	70886929	1.08362	24		, 5S_rRNA
17:21798561:23555457	17	21798561	23555457	1.7569	8		, U6
17:73302778:73302778	17	73302778	73302778	0	8		, U6
17:8943814:9283479	17	8943814	9283479	0.339665	8		, U6
18:23349337:23349337	18	23349337	23349337	0	27		, U6, 5S_rRNA
18:5164888:6051092	18	5164888	6051092	0.886204	27		, U6, 5S_rRNA
18:55662080:56733133	18	55662080	56733133	1.07105	27		, U6, 5S_rRNA
1:12209287:92448903	1	12209287	92448903	80.2396	2424		, UROD, SLC39A1, IL12A, RIT1, CP, BGLAP, CD1D, CD1, FCER1A, NCK1, PRKAA2, SOD1, KAP7, SLAMF9, SLCO2A1, CYP2J, SLAMF1, ITLN, FCGR3A, FCGR2B, DIRAS3, MX2, MX1, LEPR, RGS4, IL12RB2, CRYAA, PDXK, RXRG, GATD3, CD247, GJA8, ITGB2, RABGGTB, RCAN1, ATP5PO, IFNAR1, IFNAR2, RAB5A, BTG3, POU1F1, SLC30A7, SPP2, UGT1A1, CYM, CD53, OVGP1, ADORA3, CD80, GSK3B, RRAGC, CD86, PPIE, ATP1A1, RNF168, GUCA2A, HSD3B1, …
1:131165545:184727229	1	131165545	184727229	53.5617	2424		, UROD, SLC39A1, IL12A, RIT1, CP, BGLAP, CD1D, CD1, FCER1A, NCK1, PRKAA2, SOD1, KAP7, SLAMF9, SLCO2A1, CYP2J, SLAMF1, ITLN, FCGR3A, FCGR2B, DIRAS3, MX2, MX1, LEPR, RGS4, IL12RB2, CRYAA, PDXK, RXRG, GATD3, CD247, GJA8, ITGB2, RABGGTB, RCAN1, ATP5PO, IFNAR1, IFNAR2, RAB5A, BTG3, POU1F1, SLC30A7, SPP2, UGT1A1, CYM, CD53, OVGP1, ADORA3, CD80, GSK3B, RRAGC, CD86, PPIE, ATP1A1, RNF168, GUCA2A, HSD3B1, …
1:184990678:184990678	1	184990678	184990678	0	2424		, UROD, SLC39A1, IL12A, RIT1, CP, BGLAP, CD1D, CD1, FCER1A, NCK1, PRKAA2, SOD1, KAP7, SLAMF9, SLCO2A1, CYP2J, SLAMF1, ITLN, FCGR3A, FCGR2B, DIRAS3, MX2, MX1, LEPR, RGS4, IL12RB2, CRYAA, PDXK, RXRG, GATD3, CD247, GJA8, ITGB2, RABGGTB, RCAN1, ATP5PO, IFNAR1, IFNAR2, RAB5A, BTG3, POU1F1, SLC30A7, SPP2, UGT1A1, CYM, CD53, OVGP1, ADORA3, CD80, GSK3B, RRAGC, CD86, PPIE, ATP1A1, RNF168, GUCA2A, HSD3B1, …
1:185261120:185320639	1	185261120	185320639	0.059519	2424		, UROD, SLC39A1, IL12A, RIT1, CP, BGLAP, CD1D, CD1, FCER1A, NCK1, PRKAA2, SOD1, KAP7, SLAMF9, SLCO2A1, CYP2J, SLAMF1, ITLN, FCGR3A, FCGR2B, DIRAS3, MX2, MX1, LEPR, RGS4, IL12RB2, CRYAA, PDXK, RXRG, GATD3, CD247, GJA8, ITGB2, RABGGTB, RCAN1, ATP5PO, IFNAR1, IFNAR2, RAB5A, BTG3, POU1F1, SLC30A7, SPP2, UGT1A1, CYM, CD53, OVGP1, ADORA3, CD80, GSK3B, RRAGC, CD86, PPIE, ATP1A1, RNF168, GUCA2A, HSD3B1, …
1:186250718:186584333	1	186250718	186584333	0.333615	2424		, UROD, SLC39A1, IL12A, RIT1, CP, BGLAP, CD1D, CD1, FCER1A, NCK1, PRKAA2, SOD1, KAP7, SLAMF9, SLCO2A1, CYP2J, SLAMF1, ITLN, FCGR3A, FCGR2B, DIRAS3, MX2, MX1, LEPR, RGS4, IL12RB2, CRYAA, PDXK, RXRG, GATD3, CD247, GJA8, ITGB2, RABGGTB, RCAN1, ATP5PO, IFNAR1, IFNAR2, RAB5A, BTG3, POU1F1, SLC30A7, SPP2, UGT1A1, CYM, CD53, OVGP1, ADORA3, CD80, GSK3B, RRAGC, CD86, PPIE, ATP1A1, RNF168, GUCA2A, HSD3B1, …
1:188925442:191327328	1	188925442	191327328	2.40189	2424		, UROD, SLC39A1, IL12A, RIT1, CP, BGLAP, CD1D, CD1, FCER1A, NCK1, PRKAA2, SOD1, KAP7, SLAMF9, SLCO2A1, CYP2J, SLAMF1, ITLN, FCGR3A, FCGR2B, DIRAS3, MX2, MX1, LEPR, RGS4, IL12RB2, CRYAA, PDXK, RXRG, GATD3, CD247, GJA8, ITGB2, RABGGTB, RCAN1, ATP5PO, IFNAR1, IFNAR2, RAB5A, BTG3, POU1F1, SLC30A7, SPP2, UGT1A1, CYM, CD53, OVGP1, ADORA3, CD80, GSK3B, RRAGC, CD86, PPIE, ATP1A1, RNF168, GUCA2A, HSD3B1, …
1:191876696:191876696	1	191876696	191876696	0	2424		, UROD, SLC39A1, IL12A, RIT1, CP, BGLAP, CD1D, CD1, FCER1A, NCK1, PRKAA2, SOD1, KAP7, SLAMF9, SLCO2A1, CYP2J, SLAMF1, ITLN, FCGR3A, FCGR2B, DIRAS3, MX2, MX1, LEPR, RGS4, IL12RB2, CRYAA, PDXK, RXRG, GATD3, CD247, GJA8, ITGB2, RABGGTB, RCAN1, ATP5PO, IFNAR1, IFNAR2, RAB5A, BTG3, POU1F1, SLC30A7, SPP2, UGT1A1, CYM, CD53, OVGP1, ADORA3, CD80, GSK3B, RRAGC, CD86, PPIE, ATP1A1, RNF168, GUCA2A, HSD3B1, …
1:191964562:192856042	1	191964562	192856042	0.89148	2424		, UROD, SLC39A1, IL12A, RIT1, CP, BGLAP, CD1D, CD1, FCER1A, NCK1, PRKAA2, SOD1, KAP7, SLAMF9, SLCO2A1, CYP2J, SLAMF1, ITLN, FCGR3A, FCGR2B, DIRAS3, MX2, MX1, LEPR, RGS4, IL12RB2, CRYAA, PDXK, RXRG, GATD3, CD247, GJA8, ITGB2, RABGGTB, RCAN1, ATP5PO, IFNAR1, IFNAR2, RAB5A, BTG3, POU1F1, SLC30A7, SPP2, UGT1A1, CYM, CD53, OVGP1, ADORA3, CD80, GSK3B, RRAGC, CD86, PPIE, ATP1A1, RNF168, GUCA2A, HSD3B1, …
1:192958616:193664187	1	192958616	193664187	0.705571	2424		, UROD, SLC39A1, IL12A, RIT1, CP, BGLAP, CD1D, CD1, FCER1A, NCK1, PRKAA2, SOD1, KAP7, SLAMF9, SLCO2A1, CYP2J, SLAMF1, ITLN, FCGR3A, FCGR2B, DIRAS3, MX2, MX1, LEPR, RGS4, IL12RB2, CRYAA, PDXK, RXRG, GATD3, CD247, GJA8, ITGB2, RABGGTB, RCAN1, ATP5PO, IFNAR1, IFNAR2, RAB5A, BTG3, POU1F1, SLC30A7, SPP2, UGT1A1, CYM, CD53, OVGP1, ADORA3, CD80, GSK3B, RRAGC, CD86, PPIE, ATP1A1, RNF168, GUCA2A, HSD3B1, …
1:193849381:213383325	1	193849381	213383325	19.5339	2424		, UROD, SLC39A1, IL12A, RIT1, CP, BGLAP, CD1D, CD1, FCER1A, NCK1, PRKAA2, SOD1, KAP7, SLAMF9, SLCO2A1, CYP2J, SLAMF1, ITLN, FCGR3A, FCGR2B, DIRAS3, MX2, MX1, LEPR, RGS4, IL12RB2, CRYAA, PDXK, RXRG, GATD3, CD247, GJA8, ITGB2, RABGGTB, RCAN1, ATP5PO, IFNAR1, IFNAR2, RAB5A, BTG3, POU1F1, SLC30A7, SPP2, UGT1A1, CYM, CD53, OVGP1, ADORA3, CD80, GSK3B, RRAGC, CD86, PPIE, ATP1A1, RNF168, GUCA2A, HSD3B1, …
1:213538482:230970399	1	213538482	230970399	17.4319	2424		, UROD, SLC39A1, IL12A, RIT1, CP, BGLAP, CD1D, CD1, FCER1A, NCK1, PRKAA2, SOD1, KAP7, SLAMF9, SLCO2A1, CYP2J, SLAMF1, ITLN, FCGR3A, FCGR2B, DIRAS3, MX2, MX1, LEPR, RGS4, IL12RB2, CRYAA, PDXK, RXRG, GATD3, CD247, GJA8, ITGB2, RABGGTB, RCAN1, ATP5PO, IFNAR1, IFNAR2, RAB5A, BTG3, POU1F1, SLC30A7, SPP2, UGT1A1, CYM, CD53, OVGP1, ADORA3, CD80, GSK3B, RRAGC, CD86, PPIE, ATP1A1, RNF168, GUCA2A, HSD3B1, …
1:231439803:237251864	1	231439803	237251864	5.81206	2424		, UROD, SLC39A1, IL12A, RIT1, CP, BGLAP, CD1D, CD1, FCER1A, NCK1, PRKAA2, SOD1, KAP7, SLAMF9, SLCO2A1, CYP2J, SLAMF1, ITLN, FCGR3A, FCGR2B, DIRAS3, MX2, MX1, LEPR, RGS4, IL12RB2, CRYAA, PDXK, RXRG, GATD3, CD247, GJA8, ITGB2, RABGGTB, RCAN1, ATP5PO, IFNAR1, IFNAR2, RAB5A, BTG3, POU1F1, SLC30A7, SPP2, UGT1A1, CYM, CD53, OVGP1, ADORA3, CD80, GSK3B, RRAGC, CD86, PPIE, ATP1A1, RNF168, GUCA2A, HSD3B1, …
1:238128811:242101057	1	238128811	242101057	3.97225	2424		, UROD, SLC39A1, IL12A, RIT1, CP, BGLAP, CD1D, CD1, FCER1A, NCK1, PRKAA2, SOD1, KAP7, SLAMF9, SLCO2A1, CYP2J, SLAMF1, ITLN, FCGR3A, FCGR2B, DIRAS3, MX2, MX1, LEPR, RGS4, IL12RB2, CRYAA, PDXK, RXRG, GATD3, CD247, GJA8, ITGB2, RABGGTB, RCAN1, ATP5PO, IFNAR1, IFNAR2, RAB5A, BTG3, POU1F1, SLC30A7, SPP2, UGT1A1, CYM, CD53, OVGP1, ADORA3, CD80, GSK3B, RRAGC, CD86, PPIE, ATP1A1, RNF168, GUCA2A, HSD3B1, …
1:242229769:242413674	1	242229769	242413674	0.183905	2424		, UROD, SLC39A1, IL12A, RIT1, CP, BGLAP, CD1D, CD1, FCER1A, NCK1, PRKAA2, SOD1, KAP7, SLAMF9, SLCO2A1, CYP2J, SLAMF1, ITLN, FCGR3A, FCGR2B, DIRAS3, MX2, MX1, LEPR, RGS4, IL12RB2, CRYAA, PDXK, RXRG, GATD3, CD247, GJA8, ITGB2, RABGGTB, RCAN1, ATP5PO, IFNAR1, IFNAR2, RAB5A, BTG3, POU1F1, SLC30A7, SPP2, UGT1A1, CYM, CD53, OVGP1, ADORA3, CD80, GSK3B, RRAGC, CD86, PPIE, ATP1A1, RNF168, GUCA2A, HSD3B1, …
1:242560589:244249161	1	242560589	244249161	1.68857	2424		, UROD, SLC39A1, IL12A, RIT1, CP, BGLAP, CD1D, CD1, FCER1A, NCK1, PRKAA2, SOD1, KAP7, SLAMF9, SLCO2A1, CYP2J, SLAMF1, ITLN, FCGR3A, FCGR2B, DIRAS3, MX2, MX1, LEPR, RGS4, IL12RB2, CRYAA, PDXK, RXRG, GATD3, CD247, GJA8, ITGB2, RABGGTB, RCAN1, ATP5PO, IFNAR1, IFNAR2, RAB5A, BTG3, POU1F1, SLC30A7, SPP2, UGT1A1, CYM, CD53, OVGP1, ADORA3, CD80, GSK3B, RRAGC, CD86, PPIE, ATP1A1, RNF168, GUCA2A, HSD3B1, …
1:244304067:244304067	1	244304067	244304067	0	2424		, UROD, SLC39A1, IL12A, RIT1, CP, BGLAP, CD1D, CD1, FCER1A, NCK1, PRKAA2, SOD1, KAP7, SLAMF9, SLCO2A1, CYP2J, SLAMF1, ITLN, FCGR3A, FCGR2B, DIRAS3, MX2, MX1, LEPR, RGS4, IL12RB2, CRYAA, PDXK, RXRG, GATD3, CD247, GJA8, ITGB2, RABGGTB, RCAN1, ATP5PO, IFNAR1, IFNAR2, RAB5A, BTG3, POU1F1, SLC30A7, SPP2, UGT1A1, CYM, CD53, OVGP1, ADORA3, CD80, GSK3B, RRAGC, CD86, PPIE, ATP1A1, RNF168, GUCA2A, HSD3B1, …
1:245205454:256449600	1	245205454	256449600	11.2441	2424		, UROD, SLC39A1, IL12A, RIT1, CP, BGLAP, CD1D, CD1, FCER1A, NCK1, PRKAA2, SOD1, KAP7, SLAMF9, SLCO2A1, CYP2J, SLAMF1, ITLN, FCGR3A, FCGR2B, DIRAS3, MX2, MX1, LEPR, RGS4, IL12RB2, CRYAA, PDXK, RXRG, GATD3, CD247, GJA8, ITGB2, RABGGTB, RCAN1, ATP5PO, IFNAR1, IFNAR2, RAB5A, BTG3, POU1F1, SLC30A7, SPP2, UGT1A1, CYM, CD53, OVGP1, ADORA3, CD80, GSK3B, RRAGC, CD86, PPIE, ATP1A1, RNF168, GUCA2A, HSD3B1, …
1:257557854:268677135	1	257557854	268677135	11.1193	2424		, UROD, SLC39A1, IL12A, RIT1, CP, BGLAP, CD1D, CD1, FCER1A, NCK1, PRKAA2, SOD1, KAP7, SLAMF9, SLCO2A1, CYP2J, SLAMF1, ITLN, FCGR3A, FCGR2B, DIRAS3, MX2, MX1, LEPR, RGS4, IL12RB2, CRYAA, PDXK, RXRG, GATD3, CD247, GJA8, ITGB2, RABGGTB, RCAN1, ATP5PO, IFNAR1, IFNAR2, RAB5A, BTG3, POU1F1, SLC30A7, SPP2, UGT1A1, CYM, CD53, OVGP1, ADORA3, CD80, GSK3B, RRAGC, CD86, PPIE, ATP1A1, RNF168, GUCA2A, HSD3B1, …
1:270463506:275059480	1	270463506	275059480	4.59597	2424		, UROD, SLC39A1, IL12A, RIT1, CP, BGLAP, CD1D, CD1, FCER1A, NCK1, PRKAA2, SOD1, KAP7, SLAMF9, SLCO2A1, CYP2J, SLAMF1, ITLN, FCGR3A, FCGR2B, DIRAS3, MX2, MX1, LEPR, RGS4, IL12RB2, CRYAA, PDXK, RXRG, GATD3, CD247, GJA8, ITGB2, RABGGTB, RCAN1, ATP5PO, IFNAR1, IFNAR2, RAB5A, BTG3, POU1F1, SLC30A7, SPP2, UGT1A1, CYM, CD53, OVGP1, ADORA3, CD80, GSK3B, RRAGC, CD86, PPIE, ATP1A1, RNF168, GUCA2A, HSD3B1, …
1:275226380:290804673	1	275226380	290804673	15.5783	2424		, UROD, SLC39A1, IL12A, RIT1, CP, BGLAP, CD1D, CD1, FCER1A, NCK1, PRKAA2, SOD1, KAP7, SLAMF9, SLCO2A1, CYP2J, SLAMF1, ITLN, FCGR3A, FCGR2B, DIRAS3, MX2, MX1, LEPR, RGS4, IL12RB2, CRYAA, PDXK, RXRG, GATD3, CD247, GJA8, ITGB2, RABGGTB, RCAN1, ATP5PO, IFNAR1, IFNAR2, RAB5A, BTG3, POU1F1, SLC30A7, SPP2, UGT1A1, CYM, CD53, OVGP1, ADORA3, CD80, GSK3B, RRAGC, CD86, PPIE, ATP1A1, RNF168, GUCA2A, HSD3B1, …
1:290858370:299292454	1	290858370	299292454	8.43408	2424		, UROD, SLC39A1, IL12A, RIT1, CP, BGLAP, CD1D, CD1, FCER1A, NCK1, PRKAA2, SOD1, KAP7, SLAMF9, SLCO2A1, CYP2J, SLAMF1, ITLN, FCGR3A, FCGR2B, DIRAS3, MX2, MX1, LEPR, RGS4, IL12RB2, CRYAA, PDXK, RXRG, GATD3, CD247, GJA8, ITGB2, RABGGTB, RCAN1, ATP5PO, IFNAR1, IFNAR2, RAB5A, BTG3, POU1F1, SLC30A7, SPP2, UGT1A1, CYM, CD53, OVGP1, ADORA3, CD80, GSK3B, RRAGC, CD86, PPIE, ATP1A1, RNF168, GUCA2A, HSD3B1, …
1:3325561:11627440	1	3325561	11627440	8.30188	2424		, UROD, SLC39A1, IL12A, RIT1, CP, BGLAP, CD1D, CD1, FCER1A, NCK1, PRKAA2, SOD1, KAP7, SLAMF9, SLCO2A1, CYP2J, SLAMF1, ITLN, FCGR3A, FCGR2B, DIRAS3, MX2, MX1, LEPR, RGS4, IL12RB2, CRYAA, PDXK, RXRG, GATD3, CD247, GJA8, ITGB2, RABGGTB, RCAN1, ATP5PO, IFNAR1, IFNAR2, RAB5A, BTG3, POU1F1, SLC30A7, SPP2, UGT1A1, CYM, CD53, OVGP1, ADORA3, CD80, GSK3B, RRAGC, CD86, PPIE, ATP1A1, RNF168, GUCA2A, HSD3B1, …
1:92508855:130882100	1	92508855	130882100	38.3732	2424		, UROD, SLC39A1, IL12A, RIT1, CP, BGLAP, CD1D, CD1, FCER1A, NCK1, PRKAA2, SOD1, KAP7, SLAMF9, SLCO2A1, CYP2J, SLAMF1, ITLN, FCGR3A, FCGR2B, DIRAS3, MX2, MX1, LEPR, RGS4, IL12RB2, CRYAA, PDXK, RXRG, GATD3, CD247, GJA8, ITGB2, RABGGTB, RCAN1, ATP5PO, IFNAR1, IFNAR2, RAB5A, BTG3, POU1F1, SLC30A7, SPP2, UGT1A1, CYM, CD53, OVGP1, ADORA3, CD80, GSK3B, RRAGC, CD86, PPIE, ATP1A1, RNF168, GUCA2A, HSD3B1, …
21:18883506:23021892	21	18883506	23021892	4.13839	379		, TYR, BRMS1, NPAS4, PYGM, SDHAF2, FTH1, FEN1, CPT1A, POLR2G, U2, SNORD26, U6, SNORD22, SNORD27, 5S_rRNA, SNORD28, SNORA70, 7SK, SNORD29, SNORD25, SNORD30, SNORD31, oar-mir-194, SNORD14, SNORD15
21:2253887:3684159	21	2253887	3684159	1.43027	379		, TYR, BRMS1, NPAS4, PYGM, SDHAF2, FTH1, FEN1, CPT1A, POLR2G, U2, SNORD26, U6, SNORD22, SNORD27, 5S_rRNA, SNORD28, SNORA70, 7SK, SNORD29, SNORD25, SNORD30, SNORD31, oar-mir-194, SNORD14, SNORD15
21:24444641:25336590	21	24444641	25336590	0.891949	379		, TYR, BRMS1, NPAS4, PYGM, SDHAF2, FTH1, FEN1, CPT1A, POLR2G, U2, SNORD26, U6, SNORD22, SNORD27, 5S_rRNA, SNORD28, SNORA70, 7SK, SNORD29, SNORD25, SNORD30, SNORD31, oar-mir-194, SNORD14, SNORD15
21:25630782:25630782	21	25630782	25630782	0	379		, TYR, BRMS1, NPAS4, PYGM, SDHAF2, FTH1, FEN1, CPT1A, POLR2G, U2, SNORD26, U6, SNORD22, SNORD27, 5S_rRNA, SNORD28, SNORA70, 7SK, SNORD29, SNORD25, SNORD30, SNORD31, oar-mir-194, SNORD14, SNORD15
21:25989680:27173787	21	25989680	27173787	1.18411	379		, TYR, BRMS1, NPAS4, PYGM, SDHAF2, FTH1, FEN1, CPT1A, POLR2G, U2, SNORD26, U6, SNORD22, SNORD27, 5S_rRNA, SNORD28, SNORA70, 7SK, SNORD29, SNORD25, SNORD30, SNORD31, oar-mir-194, SNORD14, SNORD15
21:31227819:33336974	21	31227819	33336974	2.10915	379		, TYR, BRMS1, NPAS4, PYGM, SDHAF2, FTH1, FEN1, CPT1A, POLR2G, U2, SNORD26, U6, SNORD22, SNORD27, 5S_rRNA, SNORD28, SNORA70, 7SK, SNORD29, SNORD25, SNORD30, SNORD31, oar-mir-194, SNORD14, SNORD15
21:39005962:39937364	21	39005962	39937364	0.931402	379		, TYR, BRMS1, NPAS4, PYGM, SDHAF2, FTH1, FEN1, CPT1A, POLR2G, U2, SNORD26, U6, SNORD22, SNORD27, 5S_rRNA, SNORD28, SNORA70, 7SK, SNORD29, SNORD25, SNORD30, SNORD31, oar-mir-194, SNORD14, SNORD15
21:40446100:42340103	21	40446100	42340103	1.894	379		, TYR, BRMS1, NPAS4, PYGM, SDHAF2, FTH1, FEN1, CPT1A, POLR2G, U2, SNORD26, U6, SNORD22, SNORD27, 5S_rRNA, SNORD28, SNORA70, 7SK, SNORD29, SNORD25, SNORD30, SNORD31, oar-mir-194, SNORD14, SNORD15
21:43575941:43674462	21	43575941	43674462	0.098521	379		, TYR, BRMS1, NPAS4, PYGM, SDHAF2, FTH1, FEN1, CPT1A, POLR2G, U2, SNORD26, U6, SNORD22, SNORD27, 5S_rRNA, SNORD28, SNORA70, 7SK, SNORD29, SNORD25, SNORD30, SNORD31, oar-mir-194, SNORD14, SNORD15
21:44924028:48124810	21	44924028	48124810	3.20078	379		, TYR, BRMS1, NPAS4, PYGM, SDHAF2, FTH1, FEN1, CPT1A, POLR2G, U2, SNORD26, U6, SNORD22, SNORD27, 5S_rRNA, SNORD28, SNORA70, 7SK, SNORD29, SNORD25, SNORD30, SNORD31, oar-mir-194, SNORD14, SNORD15
21:48649183:52502546	21	48649183	52502546	3.85336	379		, TYR, BRMS1, NPAS4, PYGM, SDHAF2, FTH1, FEN1, CPT1A, POLR2G, U2, SNORD26, U6, SNORD22, SNORD27, 5S_rRNA, SNORD28, SNORA70, 7SK, SNORD29, SNORD25, SNORD30, SNORD31, oar-mir-194, SNORD14, SNORD15
21:5932530:7346514	21	5932530	7346514	1.41398	379		, TYR, BRMS1, NPAS4, PYGM, SDHAF2, FTH1, FEN1, CPT1A, POLR2G, U2, SNORD26, U6, SNORD22, SNORD27, 5S_rRNA, SNORD28, SNORA70, 7SK, SNORD29, SNORD25, SNORD30, SNORD31, oar-mir-194, SNORD14, SNORD15
22:12287319:12798984	22	12287319	12798984	0.511665	283	CYP2E1	CYP2E1, , ARL3, CYP17A1, SCD, LIPA, NDUFB8, ANKRD1, PITX3, U6, 5S_rRNA, SNORA70, Vault, SNORD22, oar-mir-107, 7SK, PRLHR
22:12886314:13295975	22	12886314	13295975	0.409661	283	CYP2E1	CYP2E1, , ARL3, CYP17A1, SCD, LIPA, NDUFB8, ANKRD1, PITX3, U6, 5S_rRNA, SNORA70, Vault, SNORD22, oar-mir-107, 7SK, PRLHR
22:13391242:14393496	22	13391242	14393496	1.00225	283	CYP2E1	CYP2E1, , ARL3, CYP17A1, SCD, LIPA, NDUFB8, ANKRD1, PITX3, U6, 5S_rRNA, SNORA70, Vault, SNORD22, oar-mir-107, 7SK, PRLHR
22:20260135:24014440	22	20260135	24014440	3.75431	283	CYP2E1	CYP2E1, , ARL3, CYP17A1, SCD, LIPA, NDUFB8, ANKRD1, PITX3, U6, 5S_rRNA, SNORA70, Vault, SNORD22, oar-mir-107, 7SK, PRLHR
22:25200937:26777966	22	25200937	26777966	1.57703	283	CYP2E1	CYP2E1, , ARL3, CYP17A1, SCD, LIPA, NDUFB8, ANKRD1, PITX3, U6, 5S_rRNA, SNORA70, Vault, SNORD22, oar-mir-107, 7SK, PRLHR
22:28159147:30356404	22	28159147	30356404	2.19726	283	CYP2E1	CYP2E1, , ARL3, CYP17A1, SCD, LIPA, NDUFB8, ANKRD1, PITX3, U6, 5S_rRNA, SNORA70, Vault, SNORD22, oar-mir-107, 7SK, PRLHR
22:32636831:33878018	22	32636831	33878018	1.24119	283	CYP2E1	CYP2E1, , ARL3, CYP17A1, SCD, LIPA, NDUFB8, ANKRD1, PITX3, U6, 5S_rRNA, SNORA70, Vault, SNORD22, oar-mir-107, 7SK, PRLHR
22:34246051:34246051	22	34246051	34246051	0	283	CYP2E1	CYP2E1, , ARL3, CYP17A1, SCD, LIPA, NDUFB8, ANKRD1, PITX3, U6, 5S_rRNA, SNORA70, Vault, SNORD22, oar-mir-107, 7SK, PRLHR
22:37832936:38571753	22	37832936	38571753	0.738817	283	CYP2E1	CYP2E1, , ARL3, CYP17A1, SCD, LIPA, NDUFB8, ANKRD1, PITX3, U6, 5S_rRNA, SNORA70, Vault, SNORD22, oar-mir-107, 7SK, PRLHR
22:38791039:38924008	22	38791039	38924008	0.132969	283	CYP2E1	CYP2E1, , ARL3, CYP17A1, SCD, LIPA, NDUFB8, ANKRD1, PITX3, U6, 5S_rRNA, SNORA70, Vault, SNORD22, oar-mir-107, 7SK, PRLHR
22:39034703:44153355	22	39034703	44153355	5.11865	283	CYP2E1	CYP2E1, , ARL3, CYP17A1, SCD, LIPA, NDUFB8, ANKRD1, PITX3, U6, 5S_rRNA, SNORA70, Vault, SNORD22, oar-mir-107, 7SK, PRLHR
22:47753600:48470587	22	47753600	48470587	0.716987	283	CYP2E1	CYP2E1, , ARL3, CYP17A1, SCD, LIPA, NDUFB8, ANKRD1, PITX3, U6, 5S_rRNA, SNORA70, Vault, SNORD22, oar-mir-107, 7SK, PRLHR
22:50148387:51880141	22	50148387	51880141	1.73175	283	CYP2E1	CYP2E1, , ARL3, CYP17A1, SCD, LIPA, NDUFB8, ANKRD1, PITX3, U6, 5S_rRNA, SNORA70, Vault, SNORD22, oar-mir-107, 7SK, PRLHR
22:53796980:54693133	22	53796980	54693133	0.896153	283	CYP2E1	CYP2E1, , ARL3, CYP17A1, SCD, LIPA, NDUFB8, ANKRD1, PITX3, U6, 5S_rRNA, SNORA70, Vault, SNORD22, oar-mir-107, 7SK, PRLHR
22:9282692:11217144	22	9282692	11217144	1.93445	283	CYP2E1	CYP2E1, , ARL3, CYP17A1, SCD, LIPA, NDUFB8, ANKRD1, PITX3, U6, 5S_rRNA, SNORA70, Vault, SNORD22, oar-mir-107, 7SK, PRLHR
23:10993306:14776066	23	10993306	14776066	3.78276	202		, MC5R, SLC14A1, MC2R, MC4R, SLC66A2, AQP4, U6, 5S_rRNA, SNORD58, SNORA70, U1, 7SK
23:18024705:18170090	23	18024705	18170090	0.145385	202		, MC5R, SLC14A1, MC2R, MC4R, SLC66A2, AQP4, U6, 5S_rRNA, SNORD58, SNORA70, U1, 7SK
23:18533222:19158789	23	18533222	19158789	0.625567	202		, MC5R, SLC14A1, MC2R, MC4R, SLC66A2, AQP4, U6, 5S_rRNA, SNORD58, SNORA70, U1, 7SK
23:19306415:19306415	23	19306415	19306415	0	202		, MC5R, SLC14A1, MC2R, MC4R, SLC66A2, AQP4, U6, 5S_rRNA, SNORD58, SNORA70, U1, 7SK
23:19813395:20711866	23	19813395	20711866	0.898471	202		, MC5R, SLC14A1, MC2R, MC4R, SLC66A2, AQP4, U6, 5S_rRNA, SNORD58, SNORA70, U1, 7SK
23:21958486:25260025	23	21958486	25260025	3.30154	202		, MC5R, SLC14A1, MC2R, MC4R, SLC66A2, AQP4, U6, 5S_rRNA, SNORD58, SNORA70, U1, 7SK
23:28820638:33076217	23	28820638	33076217	4.25558	202		, MC5R, SLC14A1, MC2R, MC4R, SLC66A2, AQP4, U6, 5S_rRNA, SNORD58, SNORA70, U1, 7SK
23:41376982:43387679	23	41376982	43387679	2.0107	202		, MC5R, SLC14A1, MC2R, MC4R, SLC66A2, AQP4, U6, 5S_rRNA, SNORD58, SNORA70, U1, 7SK
23:43724718:43724718	23	43724718	43724718	0	202		, MC5R, SLC14A1, MC2R, MC4R, SLC66A2, AQP4, U6, 5S_rRNA, SNORD58, SNORA70, U1, 7SK
23:43875745:44089565	23	43875745	44089565	0.21382	202		, MC5R, SLC14A1, MC2R, MC4R, SLC66A2, AQP4, U6, 5S_rRNA, SNORD58, SNORA70, U1, 7SK
23:44967083:44967083	23	44967083	44967083	0	202		, MC5R, SLC14A1, MC2R, MC4R, SLC66A2, AQP4, U6, 5S_rRNA, SNORD58, SNORA70, U1, 7SK
23:45376716:45751743	23	45376716	45751743	0.375027	202		, MC5R, SLC14A1, MC2R, MC4R, SLC66A2, AQP4, U6, 5S_rRNA, SNORD58, SNORA70, U1, 7SK
23:47114772:47114772	23	47114772	47114772	0	202		, MC5R, SLC14A1, MC2R, MC4R, SLC66A2, AQP4, U6, 5S_rRNA, SNORD58, SNORA70, U1, 7SK
23:47274689:49578676	23	47274689	49578676	2.30399	202		, MC5R, SLC14A1, MC2R, MC4R, SLC66A2, AQP4, U6, 5S_rRNA, SNORD58, SNORA70, U1, 7SK
23:486378:3683029	23	486378	3683029	3.19665	202		, MC5R, SLC14A1, MC2R, MC4R, SLC66A2, AQP4, U6, 5S_rRNA, SNORD58, SNORA70, U1, 7SK
23:49704838:49846138	23	49704838	49846138	0.1413	202		, MC5R, SLC14A1, MC2R, MC4R, SLC66A2, AQP4, U6, 5S_rRNA, SNORD58, SNORA70, U1, 7SK
23:51664302:54433033	23	51664302	54433033	2.76873	202		, MC5R, SLC14A1, MC2R, MC4R, SLC66A2, AQP4, U6, 5S_rRNA, SNORD58, SNORA70, U1, 7SK
23:56705612:56705612	23	56705612	56705612	0	202		, MC5R, SLC14A1, MC2R, MC4R, SLC66A2, AQP4, U6, 5S_rRNA, SNORD58, SNORA70, U1, 7SK
23:56983957:57018592	23	56983957	57018592	0.034635	202		, MC5R, SLC14A1, MC2R, MC4R, SLC66A2, AQP4, U6, 5S_rRNA, SNORD58, SNORA70, U1, 7SK
23:58897310:60556779	23	58897310	60556779	1.65947	202		, MC5R, SLC14A1, MC2R, MC4R, SLC66A2, AQP4, U6, 5S_rRNA, SNORD58, SNORA70, U1, 7SK
23:62616052:62616052	23	62616052	62616052	0	202		, MC5R, SLC14A1, MC2R, MC4R, SLC66A2, AQP4, U6, 5S_rRNA, SNORD58, SNORA70, U1, 7SK
23:6275887:7583632	23	6275887	7583632	1.30774	202		, MC5R, SLC14A1, MC2R, MC4R, SLC66A2, AQP4, U6, 5S_rRNA, SNORD58, SNORA70, U1, 7SK
24:12222803:13902338	24	12222803	13902338	1.67954	388		, AIMP2, RAC1, EIF3C, ACTB, NUBP1, ITGAM, PSPH, ARL6IP1, RAN, IL21R, 5S_rRNA, SNORD14, U6, U5, U2, 7SK
24:15159567:18471023	24	15159567	18471023	3.31146	388		, AIMP2, RAC1, EIF3C, ACTB, NUBP1, ITGAM, PSPH, ARL6IP1, RAN, IL21R, 5S_rRNA, SNORD14, U6, U5, U2, 7SK
24:18856734:20052648	24	18856734	20052648	1.19591	388		, AIMP2, RAC1, EIF3C, ACTB, NUBP1, ITGAM, PSPH, ARL6IP1, RAN, IL21R, 5S_rRNA, SNORD14, U6, U5, U2, 7SK
24:20753430:20844240	24	20753430	20844240	0.09081	388		, AIMP2, RAC1, EIF3C, ACTB, NUBP1, ITGAM, PSPH, ARL6IP1, RAN, IL21R, 5S_rRNA, SNORD14, U6, U5, U2, 7SK
24:21200291:22627297	24	21200291	22627297	1.42701	388		, AIMP2, RAC1, EIF3C, ACTB, NUBP1, ITGAM, PSPH, ARL6IP1, RAN, IL21R, 5S_rRNA, SNORD14, U6, U5, U2, 7SK
24:2282773:11349661	24	2282773	11349661	9.06689	388		, AIMP2, RAC1, EIF3C, ACTB, NUBP1, ITGAM, PSPH, ARL6IP1, RAN, IL21R, 5S_rRNA, SNORD14, U6, U5, U2, 7SK
24:24662380:26287518	24	24662380	26287518	1.62514	388		, AIMP2, RAC1, EIF3C, ACTB, NUBP1, ITGAM, PSPH, ARL6IP1, RAN, IL21R, 5S_rRNA, SNORD14, U6, U5, U2, 7SK
24:27265846:28433747	24	27265846	28433747	1.1679	388		, AIMP2, RAC1, EIF3C, ACTB, NUBP1, ITGAM, PSPH, ARL6IP1, RAN, IL21R, 5S_rRNA, SNORD14, U6, U5, U2, 7SK
24:28715145:32311680	24	28715145	32311680	3.59653	388		, AIMP2, RAC1, EIF3C, ACTB, NUBP1, ITGAM, PSPH, ARL6IP1, RAN, IL21R, 5S_rRNA, SNORD14, U6, U5, U2, 7SK
24:33703095:34073156	24	33703095	34073156	0.370061	388		, AIMP2, RAC1, EIF3C, ACTB, NUBP1, ITGAM, PSPH, ARL6IP1, RAN, IL21R, 5S_rRNA, SNORD14, U6, U5, U2, 7SK
24:37214297:38789385	24	37214297	38789385	1.57509	388		, AIMP2, RAC1, EIF3C, ACTB, NUBP1, ITGAM, PSPH, ARL6IP1, RAN, IL21R, 5S_rRNA, SNORD14, U6, U5, U2, 7SK
24:42411663:42814457	24	42411663	42814457	0.402794	388		, AIMP2, RAC1, EIF3C, ACTB, NUBP1, ITGAM, PSPH, ARL6IP1, RAN, IL21R, 5S_rRNA, SNORD14, U6, U5, U2, 7SK
24:43169917:43169917	24	43169917	43169917	0	388		, AIMP2, RAC1, EIF3C, ACTB, NUBP1, ITGAM, PSPH, ARL6IP1, RAN, IL21R, 5S_rRNA, SNORD14, U6, U5, U2, 7SK
24:43429355:43579432	24	43429355	43579432	0.150077	388		, AIMP2, RAC1, EIF3C, ACTB, NUBP1, ITGAM, PSPH, ARL6IP1, RAN, IL21R, 5S_rRNA, SNORD14, U6, U5, U2, 7SK
25:14528683:14528683	25	14528683	14528683	0	169		, CDK1, DDX21, PLAU, U6, 5S_rRNA, Y_RNA, SNORD16
25:14612966:14612966	25	14612966	14612966	0	169		, CDK1, DDX21, PLAU, U6, 5S_rRNA, Y_RNA, SNORD16
25:14804609:17237061	25	14804609	17237061	2.43245	169		, CDK1, DDX21, PLAU, U6, 5S_rRNA, Y_RNA, SNORD16
25:1600342:2682833	25	1600342	2682833	1.08249	169		, CDK1, DDX21, PLAU, U6, 5S_rRNA, Y_RNA, SNORD16
25:17897769:18913722	25	17897769	18913722	1.01595	169		, CDK1, DDX21, PLAU, U6, 5S_rRNA, Y_RNA, SNORD16
25:19386910:21378607	25	19386910	21378607	1.9917	169		, CDK1, DDX21, PLAU, U6, 5S_rRNA, Y_RNA, SNORD16
25:24580522:27849919	25	24580522	27849919	3.2694	169		, CDK1, DDX21, PLAU, U6, 5S_rRNA, Y_RNA, SNORD16
25:29488935:32968639	25	29488935	32968639	3.4797	169		, CDK1, DDX21, PLAU, U6, 5S_rRNA, Y_RNA, SNORD16
25:5034112:8118133	25	5034112	8118133	3.08402	169		, CDK1, DDX21, PLAU, U6, 5S_rRNA, Y_RNA, SNORD16
25:8324086:11114166	25	8324086	11114166	2.79008	169		, CDK1, DDX21, PLAU, U6, 5S_rRNA, Y_RNA, SNORD16
26:30002414:30930112	26	30002414	30930112	0.927698	99		, ADRB3, STAR, LSM1, IDO1, FNTA, THRB, 5S_rRNA, U6, U1
26:31479674:31479674	26	31479674	31479674	0	99		, ADRB3, STAR, LSM1, IDO1, FNTA, THRB, 5S_rRNA, U6, U1
26:31704433:32193983	26	31704433	32193983	0.48955	99		, ADRB3, STAR, LSM1, IDO1, FNTA, THRB, 5S_rRNA, U6, U1
26:32558263:34493892	26	32558263	34493892	1.93563	99		, ADRB3, STAR, LSM1, IDO1, FNTA, THRB, 5S_rRNA, U6, U1
26:34945353:34945353	26	34945353	34945353	0	99		, ADRB3, STAR, LSM1, IDO1, FNTA, THRB, 5S_rRNA, U6, U1
26:35226927:35281079	26	35226927	35281079	0.054152	99		, ADRB3, STAR, LSM1, IDO1, FNTA, THRB, 5S_rRNA, U6, U1
26:36173198:40213172	26	36173198	40213172	4.03997	99		, ADRB3, STAR, LSM1, IDO1, FNTA, THRB, 5S_rRNA, U6, U1
26:40344361:43006337	26	40344361	43006337	2.66198	99		, ADRB3, STAR, LSM1, IDO1, FNTA, THRB, 5S_rRNA, U6, U1
26:43707091:47463408	26	43707091	47463408	3.75632	99		, ADRB3, STAR, LSM1, IDO1, FNTA, THRB, 5S_rRNA, U6, U1
26:48090214:48090214	26	48090214	48090214	0	99		, ADRB3, STAR, LSM1, IDO1, FNTA, THRB, 5S_rRNA, U6, U1
26:48156585:49702366	26	48156585	49702366	1.54578	99		, ADRB3, STAR, LSM1, IDO1, FNTA, THRB, 5S_rRNA, U6, U1
2:116465453:125052021	2	116465453	125052021	8.58657	1950		, FABP3, EYA3, NFIL3, LIN28A, CD52, GSN, TLR4, GCG, LPAR1, TXN, ITGB6, KLF4, ID3, ALDOB, C1QA, ARL5A, RRAGA, UBQLN1, GLRX, B4GALT1, ACVR2A, KYNU, SFTPC, CXCR4, DARS1, LPL, RORB, ALDH1A1, ZFAND5, TYRP1, NFIB, STAT1, PSIP1, PLIN2, NDUFB6, CTSB, MSTN, OSGEPL1, GULP1, ITGAV, PPIL3, NIF3L1, BMPR2, CD28, SFN, CTLA4, IDH1, IGFBP5, SLC11A1, PRKAG3, TUBA4A, INHA, ITM2C, COPS7B, LCK, 5S_rRNA, U4, U6, SNORA…
2:125441100:150410790	2	125441100	150410790	24.9697	1950		, FABP3, EYA3, NFIL3, LIN28A, CD52, GSN, TLR4, GCG, LPAR1, TXN, ITGB6, KLF4, ID3, ALDOB, C1QA, ARL5A, RRAGA, UBQLN1, GLRX, B4GALT1, ACVR2A, KYNU, SFTPC, CXCR4, DARS1, LPL, RORB, ALDH1A1, ZFAND5, TYRP1, NFIB, STAT1, PSIP1, PLIN2, NDUFB6, CTSB, MSTN, OSGEPL1, GULP1, ITGAV, PPIL3, NIF3L1, BMPR2, CD28, SFN, CTLA4, IDH1, IGFBP5, SLC11A1, PRKAG3, TUBA4A, INHA, ITM2C, COPS7B, LCK, 5S_rRNA, U4, U6, SNORA…
2:150660411:197417307	2	150660411	197417307	46.7569	1950		, FABP3, EYA3, NFIL3, LIN28A, CD52, GSN, TLR4, GCG, LPAR1, TXN, ITGB6, KLF4, ID3, ALDOB, C1QA, ARL5A, RRAGA, UBQLN1, GLRX, B4GALT1, ACVR2A, KYNU, SFTPC, CXCR4, DARS1, LPL, RORB, ALDH1A1, ZFAND5, TYRP1, NFIB, STAT1, PSIP1, PLIN2, NDUFB6, CTSB, MSTN, OSGEPL1, GULP1, ITGAV, PPIL3, NIF3L1, BMPR2, CD28, SFN, CTLA4, IDH1, IGFBP5, SLC11A1, PRKAG3, TUBA4A, INHA, ITM2C, COPS7B, LCK, 5S_rRNA, U4, U6, SNORA…
2:198470252:200621949	2	198470252	200621949	2.1517	1950		, FABP3, EYA3, NFIL3, LIN28A, CD52, GSN, TLR4, GCG, LPAR1, TXN, ITGB6, KLF4, ID3, ALDOB, C1QA, ARL5A, RRAGA, UBQLN1, GLRX, B4GALT1, ACVR2A, KYNU, SFTPC, CXCR4, DARS1, LPL, RORB, ALDH1A1, ZFAND5, TYRP1, NFIB, STAT1, PSIP1, PLIN2, NDUFB6, CTSB, MSTN, OSGEPL1, GULP1, ITGAV, PPIL3, NIF3L1, BMPR2, CD28, SFN, CTLA4, IDH1, IGFBP5, SLC11A1, PRKAG3, TUBA4A, INHA, ITM2C, COPS7B, LCK, 5S_rRNA, U4, U6, SNORA…
2:202060076:204118069	2	202060076	204118069	2.05799	1950		, FABP3, EYA3, NFIL3, LIN28A, CD52, GSN, TLR4, GCG, LPAR1, TXN, ITGB6, KLF4, ID3, ALDOB, C1QA, ARL5A, RRAGA, UBQLN1, GLRX, B4GALT1, ACVR2A, KYNU, SFTPC, CXCR4, DARS1, LPL, RORB, ALDH1A1, ZFAND5, TYRP1, NFIB, STAT1, PSIP1, PLIN2, NDUFB6, CTSB, MSTN, OSGEPL1, GULP1, ITGAV, PPIL3, NIF3L1, BMPR2, CD28, SFN, CTLA4, IDH1, IGFBP5, SLC11A1, PRKAG3, TUBA4A, INHA, ITM2C, COPS7B, LCK, 5S_rRNA, U4, U6, SNORA…
2:204381990:205850631	2	204381990	205850631	1.46864	1950		, FABP3, EYA3, NFIL3, LIN28A, CD52, GSN, TLR4, GCG, LPAR1, TXN, ITGB6, KLF4, ID3, ALDOB, C1QA, ARL5A, RRAGA, UBQLN1, GLRX, B4GALT1, ACVR2A, KYNU, SFTPC, CXCR4, DARS1, LPL, RORB, ALDH1A1, ZFAND5, TYRP1, NFIB, STAT1, PSIP1, PLIN2, NDUFB6, CTSB, MSTN, OSGEPL1, GULP1, ITGAV, PPIL3, NIF3L1, BMPR2, CD28, SFN, CTLA4, IDH1, IGFBP5, SLC11A1, PRKAG3, TUBA4A, INHA, ITM2C, COPS7B, LCK, 5S_rRNA, U4, U6, SNORA…
2:206170952:206338195	2	206170952	206338195	0.167243	1950		, FABP3, EYA3, NFIL3, LIN28A, CD52, GSN, TLR4, GCG, LPAR1, TXN, ITGB6, KLF4, ID3, ALDOB, C1QA, ARL5A, RRAGA, UBQLN1, GLRX, B4GALT1, ACVR2A, KYNU, SFTPC, CXCR4, DARS1, LPL, RORB, ALDH1A1, ZFAND5, TYRP1, NFIB, STAT1, PSIP1, PLIN2, NDUFB6, CTSB, MSTN, OSGEPL1, GULP1, ITGAV, PPIL3, NIF3L1, BMPR2, CD28, SFN, CTLA4, IDH1, IGFBP5, SLC11A1, PRKAG3, TUBA4A, INHA, ITM2C, COPS7B, LCK, 5S_rRNA, U4, U6, SNORA…
2:206475901:208317124	2	206475901	208317124	1.84122	1950		, FABP3, EYA3, NFIL3, LIN28A, CD52, GSN, TLR4, GCG, LPAR1, TXN, ITGB6, KLF4, ID3, ALDOB, C1QA, ARL5A, RRAGA, UBQLN1, GLRX, B4GALT1, ACVR2A, KYNU, SFTPC, CXCR4, DARS1, LPL, RORB, ALDH1A1, ZFAND5, TYRP1, NFIB, STAT1, PSIP1, PLIN2, NDUFB6, CTSB, MSTN, OSGEPL1, GULP1, ITGAV, PPIL3, NIF3L1, BMPR2, CD28, SFN, CTLA4, IDH1, IGFBP5, SLC11A1, PRKAG3, TUBA4A, INHA, ITM2C, COPS7B, LCK, 5S_rRNA, U4, U6, SNORA…
2:209201325:210329075	2	209201325	210329075	1.12775	1950		, FABP3, EYA3, NFIL3, LIN28A, CD52, GSN, TLR4, GCG, LPAR1, TXN, ITGB6, KLF4, ID3, ALDOB, C1QA, ARL5A, RRAGA, UBQLN1, GLRX, B4GALT1, ACVR2A, KYNU, SFTPC, CXCR4, DARS1, LPL, RORB, ALDH1A1, ZFAND5, TYRP1, NFIB, STAT1, PSIP1, PLIN2, NDUFB6, CTSB, MSTN, OSGEPL1, GULP1, ITGAV, PPIL3, NIF3L1, BMPR2, CD28, SFN, CTLA4, IDH1, IGFBP5, SLC11A1, PRKAG3, TUBA4A, INHA, ITM2C, COPS7B, LCK, 5S_rRNA, U4, U6, SNORA…
2:210621149:245949843	2	210621149	245949843	35.3287	1950		, FABP3, EYA3, NFIL3, LIN28A, CD52, GSN, TLR4, GCG, LPAR1, TXN, ITGB6, KLF4, ID3, ALDOB, C1QA, ARL5A, RRAGA, UBQLN1, GLRX, B4GALT1, ACVR2A, KYNU, SFTPC, CXCR4, DARS1, LPL, RORB, ALDH1A1, ZFAND5, TYRP1, NFIB, STAT1, PSIP1, PLIN2, NDUFB6, CTSB, MSTN, OSGEPL1, GULP1, ITGAV, PPIL3, NIF3L1, BMPR2, CD28, SFN, CTLA4, IDH1, IGFBP5, SLC11A1, PRKAG3, TUBA4A, INHA, ITM2C, COPS7B, LCK, 5S_rRNA, U4, U6, SNORA…
2:21680827:34114516	2	21680827	34114516	12.4337	1950		, FABP3, EYA3, NFIL3, LIN28A, CD52, GSN, TLR4, GCG, LPAR1, TXN, ITGB6, KLF4, ID3, ALDOB, C1QA, ARL5A, RRAGA, UBQLN1, GLRX, B4GALT1, ACVR2A, KYNU, SFTPC, CXCR4, DARS1, LPL, RORB, ALDH1A1, ZFAND5, TYRP1, NFIB, STAT1, PSIP1, PLIN2, NDUFB6, CTSB, MSTN, OSGEPL1, GULP1, ITGAV, PPIL3, NIF3L1, BMPR2, CD28, SFN, CTLA4, IDH1, IGFBP5, SLC11A1, PRKAG3, TUBA4A, INHA, ITM2C, COPS7B, LCK, 5S_rRNA, U4, U6, SNORA…
2:2459:21440709	2	2459	21440709	21.4383	1950		, FABP3, EYA3, NFIL3, LIN28A, CD52, GSN, TLR4, GCG, LPAR1, TXN, ITGB6, KLF4, ID3, ALDOB, C1QA, ARL5A, RRAGA, UBQLN1, GLRX, B4GALT1, ACVR2A, KYNU, SFTPC, CXCR4, DARS1, LPL, RORB, ALDH1A1, ZFAND5, TYRP1, NFIB, STAT1, PSIP1, PLIN2, NDUFB6, CTSB, MSTN, OSGEPL1, GULP1, ITGAV, PPIL3, NIF3L1, BMPR2, CD28, SFN, CTLA4, IDH1, IGFBP5, SLC11A1, PRKAG3, TUBA4A, INHA, ITM2C, COPS7B, LCK, 5S_rRNA, U4, U6, SNORA…
2:246068100:248252182	2	246068100	248252182	2.18408	1950		, FABP3, EYA3, NFIL3, LIN28A, CD52, GSN, TLR4, GCG, LPAR1, TXN, ITGB6, KLF4, ID3, ALDOB, C1QA, ARL5A, RRAGA, UBQLN1, GLRX, B4GALT1, ACVR2A, KYNU, SFTPC, CXCR4, DARS1, LPL, RORB, ALDH1A1, ZFAND5, TYRP1, NFIB, STAT1, PSIP1, PLIN2, NDUFB6, CTSB, MSTN, OSGEPL1, GULP1, ITGAV, PPIL3, NIF3L1, BMPR2, CD28, SFN, CTLA4, IDH1, IGFBP5, SLC11A1, PRKAG3, TUBA4A, INHA, ITM2C, COPS7B, LCK, 5S_rRNA, U4, U6, SNORA…
2:248329507:248329507	2	248329507	248329507	0	1950		, FABP3, EYA3, NFIL3, LIN28A, CD52, GSN, TLR4, GCG, LPAR1, TXN, ITGB6, KLF4, ID3, ALDOB, C1QA, ARL5A, RRAGA, UBQLN1, GLRX, B4GALT1, ACVR2A, KYNU, SFTPC, CXCR4, DARS1, LPL, RORB, ALDH1A1, ZFAND5, TYRP1, NFIB, STAT1, PSIP1, PLIN2, NDUFB6, CTSB, MSTN, OSGEPL1, GULP1, ITGAV, PPIL3, NIF3L1, BMPR2, CD28, SFN, CTLA4, IDH1, IGFBP5, SLC11A1, PRKAG3, TUBA4A, INHA, ITM2C, COPS7B, LCK, 5S_rRNA, U4, U6, SNORA…
2:248407557:248407557	2	248407557	248407557	0	1950		, FABP3, EYA3, NFIL3, LIN28A, CD52, GSN, TLR4, GCG, LPAR1, TXN, ITGB6, KLF4, ID3, ALDOB, C1QA, ARL5A, RRAGA, UBQLN1, GLRX, B4GALT1, ACVR2A, KYNU, SFTPC, CXCR4, DARS1, LPL, RORB, ALDH1A1, ZFAND5, TYRP1, NFIB, STAT1, PSIP1, PLIN2, NDUFB6, CTSB, MSTN, OSGEPL1, GULP1, ITGAV, PPIL3, NIF3L1, BMPR2, CD28, SFN, CTLA4, IDH1, IGFBP5, SLC11A1, PRKAG3, TUBA4A, INHA, ITM2C, COPS7B, LCK, 5S_rRNA, U4, U6, SNORA…
2:248500425:263108520	2	248500425	263108520	14.6081	1950		, FABP3, EYA3, NFIL3, LIN28A, CD52, GSN, TLR4, GCG, LPAR1, TXN, ITGB6, KLF4, ID3, ALDOB, C1QA, ARL5A, RRAGA, UBQLN1, GLRX, B4GALT1, ACVR2A, KYNU, SFTPC, CXCR4, DARS1, LPL, RORB, ALDH1A1, ZFAND5, TYRP1, NFIB, STAT1, PSIP1, PLIN2, NDUFB6, CTSB, MSTN, OSGEPL1, GULP1, ITGAV, PPIL3, NIF3L1, BMPR2, CD28, SFN, CTLA4, IDH1, IGFBP5, SLC11A1, PRKAG3, TUBA4A, INHA, ITM2C, COPS7B, LCK, 5S_rRNA, U4, U6, SNORA…
2:35071416:43599765	2	35071416	43599765	8.52835	1950		, FABP3, EYA3, NFIL3, LIN28A, CD52, GSN, TLR4, GCG, LPAR1, TXN, ITGB6, KLF4, ID3, ALDOB, C1QA, ARL5A, RRAGA, UBQLN1, GLRX, B4GALT1, ACVR2A, KYNU, SFTPC, CXCR4, DARS1, LPL, RORB, ALDH1A1, ZFAND5, TYRP1, NFIB, STAT1, PSIP1, PLIN2, NDUFB6, CTSB, MSTN, OSGEPL1, GULP1, ITGAV, PPIL3, NIF3L1, BMPR2, CD28, SFN, CTLA4, IDH1, IGFBP5, SLC11A1, PRKAG3, TUBA4A, INHA, ITM2C, COPS7B, LCK, 5S_rRNA, U4, U6, SNORA…
2:43666810:46196697	2	43666810	46196697	2.52989	1950		, FABP3, EYA3, NFIL3, LIN28A, CD52, GSN, TLR4, GCG, LPAR1, TXN, ITGB6, KLF4, ID3, ALDOB, C1QA, ARL5A, RRAGA, UBQLN1, GLRX, B4GALT1, ACVR2A, KYNU, SFTPC, CXCR4, DARS1, LPL, RORB, ALDH1A1, ZFAND5, TYRP1, NFIB, STAT1, PSIP1, PLIN2, NDUFB6, CTSB, MSTN, OSGEPL1, GULP1, ITGAV, PPIL3, NIF3L1, BMPR2, CD28, SFN, CTLA4, IDH1, IGFBP5, SLC11A1, PRKAG3, TUBA4A, INHA, ITM2C, COPS7B, LCK, 5S_rRNA, U4, U6, SNORA…
2:47208208:52777752	2	47208208	52777752	5.56954	1950		, FABP3, EYA3, NFIL3, LIN28A, CD52, GSN, TLR4, GCG, LPAR1, TXN, ITGB6, KLF4, ID3, ALDOB, C1QA, ARL5A, RRAGA, UBQLN1, GLRX, B4GALT1, ACVR2A, KYNU, SFTPC, CXCR4, DARS1, LPL, RORB, ALDH1A1, ZFAND5, TYRP1, NFIB, STAT1, PSIP1, PLIN2, NDUFB6, CTSB, MSTN, OSGEPL1, GULP1, ITGAV, PPIL3, NIF3L1, BMPR2, CD28, SFN, CTLA4, IDH1, IGFBP5, SLC11A1, PRKAG3, TUBA4A, INHA, ITM2C, COPS7B, LCK, 5S_rRNA, U4, U6, SNORA…
2:53153262:81513306	2	53153262	81513306	28.36	1950		, FABP3, EYA3, NFIL3, LIN28A, CD52, GSN, TLR4, GCG, LPAR1, TXN, ITGB6, KLF4, ID3, ALDOB, C1QA, ARL5A, RRAGA, UBQLN1, GLRX, B4GALT1, ACVR2A, KYNU, SFTPC, CXCR4, DARS1, LPL, RORB, ALDH1A1, ZFAND5, TYRP1, NFIB, STAT1, PSIP1, PLIN2, NDUFB6, CTSB, MSTN, OSGEPL1, GULP1, ITGAV, PPIL3, NIF3L1, BMPR2, CD28, SFN, CTLA4, IDH1, IGFBP5, SLC11A1, PRKAG3, TUBA4A, INHA, ITM2C, COPS7B, LCK, 5S_rRNA, U4, U6, SNORA…
2:82089332:82499671	2	82089332	82499671	0.410339	1950		, FABP3, EYA3, NFIL3, LIN28A, CD52, GSN, TLR4, GCG, LPAR1, TXN, ITGB6, KLF4, ID3, ALDOB, C1QA, ARL5A, RRAGA, UBQLN1, GLRX, B4GALT1, ACVR2A, KYNU, SFTPC, CXCR4, DARS1, LPL, RORB, ALDH1A1, ZFAND5, TYRP1, NFIB, STAT1, PSIP1, PLIN2, NDUFB6, CTSB, MSTN, OSGEPL1, GULP1, ITGAV, PPIL3, NIF3L1, BMPR2, CD28, SFN, CTLA4, IDH1, IGFBP5, SLC11A1, PRKAG3, TUBA4A, INHA, ITM2C, COPS7B, LCK, 5S_rRNA, U4, U6, SNORA…
2:82890493:82897581	2	82890493	82897581	0.007088	1950		, FABP3, EYA3, NFIL3, LIN28A, CD52, GSN, TLR4, GCG, LPAR1, TXN, ITGB6, KLF4, ID3, ALDOB, C1QA, ARL5A, RRAGA, UBQLN1, GLRX, B4GALT1, ACVR2A, KYNU, SFTPC, CXCR4, DARS1, LPL, RORB, ALDH1A1, ZFAND5, TYRP1, NFIB, STAT1, PSIP1, PLIN2, NDUFB6, CTSB, MSTN, OSGEPL1, GULP1, ITGAV, PPIL3, NIF3L1, BMPR2, CD28, SFN, CTLA4, IDH1, IGFBP5, SLC11A1, PRKAG3, TUBA4A, INHA, ITM2C, COPS7B, LCK, 5S_rRNA, U4, U6, SNORA…
2:83063721:86714063	2	83063721	86714063	3.65034	1950		, FABP3, EYA3, NFIL3, LIN28A, CD52, GSN, TLR4, GCG, LPAR1, TXN, ITGB6, KLF4, ID3, ALDOB, C1QA, ARL5A, RRAGA, UBQLN1, GLRX, B4GALT1, ACVR2A, KYNU, SFTPC, CXCR4, DARS1, LPL, RORB, ALDH1A1, ZFAND5, TYRP1, NFIB, STAT1, PSIP1, PLIN2, NDUFB6, CTSB, MSTN, OSGEPL1, GULP1, ITGAV, PPIL3, NIF3L1, BMPR2, CD28, SFN, CTLA4, IDH1, IGFBP5, SLC11A1, PRKAG3, TUBA4A, INHA, ITM2C, COPS7B, LCK, 5S_rRNA, U4, U6, SNORA…
2:87005253:94240634	2	87005253	94240634	7.23538	1950		, FABP3, EYA3, NFIL3, LIN28A, CD52, GSN, TLR4, GCG, LPAR1, TXN, ITGB6, KLF4, ID3, ALDOB, C1QA, ARL5A, RRAGA, UBQLN1, GLRX, B4GALT1, ACVR2A, KYNU, SFTPC, CXCR4, DARS1, LPL, RORB, ALDH1A1, ZFAND5, TYRP1, NFIB, STAT1, PSIP1, PLIN2, NDUFB6, CTSB, MSTN, OSGEPL1, GULP1, ITGAV, PPIL3, NIF3L1, BMPR2, CD28, SFN, CTLA4, IDH1, IGFBP5, SLC11A1, PRKAG3, TUBA4A, INHA, ITM2C, COPS7B, LCK, 5S_rRNA, U4, U6, SNORA…
2:94313934:115851252	2	94313934	115851252	21.5373	1950		, FABP3, EYA3, NFIL3, LIN28A, CD52, GSN, TLR4, GCG, LPAR1, TXN, ITGB6, KLF4, ID3, ALDOB, C1QA, ARL5A, RRAGA, UBQLN1, GLRX, B4GALT1, ACVR2A, KYNU, SFTPC, CXCR4, DARS1, LPL, RORB, ALDH1A1, ZFAND5, TYRP1, NFIB, STAT1, PSIP1, PLIN2, NDUFB6, CTSB, MSTN, OSGEPL1, GULP1, ITGAV, PPIL3, NIF3L1, BMPR2, CD28, SFN, CTLA4, IDH1, IGFBP5, SLC11A1, PRKAG3, TUBA4A, INHA, ITM2C, COPS7B, LCK, 5S_rRNA, U4, U6, SNORA…
3:119560811:124569037	3	119560811	124569037	5.00823	2279		, IL22, IFNG, SLC2A3, CLHC1, AVPR1A, FSHR, PAEP, EPCAM, CALM2, CDK4, CD4, ABCG8, GAPDH, CD9, MIP, TIMELESS, IL23A, QPCT, URM1, CCND2, CDK2, TSPAN9, MMP19, AK1, SLC25A3, CNGA3, CIAO1, PTGS1, GGTA1, ARL1, MYF6, HPCAL1, C3H12orf29, DCN, NDUFA12, CBX5, HOXC6, ATP5MC2, TARBP2, ATXN7L3B, BTG1, SLC25A17, CRY1, RTCB, AQP5, TIMP3, TEF, POMC, RAB10, HADHA, MB, NAGA, EIF3D, CIB4, IFT27, QRFP, RHOB, RBKS, RP…
3:125103492:125156136	3	125103492	125156136	0.052644	2279		, IL22, IFNG, SLC2A3, CLHC1, AVPR1A, FSHR, PAEP, EPCAM, CALM2, CDK4, CD4, ABCG8, GAPDH, CD9, MIP, TIMELESS, IL23A, QPCT, URM1, CCND2, CDK2, TSPAN9, MMP19, AK1, SLC25A3, CNGA3, CIAO1, PTGS1, GGTA1, ARL1, MYF6, HPCAL1, C3H12orf29, DCN, NDUFA12, CBX5, HOXC6, ATP5MC2, TARBP2, ATXN7L3B, BTG1, SLC25A17, CRY1, RTCB, AQP5, TIMP3, TEF, POMC, RAB10, HADHA, MB, NAGA, EIF3D, CIB4, IFT27, QRFP, RHOB, RBKS, RP…
3:126478959:131028558	3	126478959	131028558	4.5496	2279		, IL22, IFNG, SLC2A3, CLHC1, AVPR1A, FSHR, PAEP, EPCAM, CALM2, CDK4, CD4, ABCG8, GAPDH, CD9, MIP, TIMELESS, IL23A, QPCT, URM1, CCND2, CDK2, TSPAN9, MMP19, AK1, SLC25A3, CNGA3, CIAO1, PTGS1, GGTA1, ARL1, MYF6, HPCAL1, C3H12orf29, DCN, NDUFA12, CBX5, HOXC6, ATP5MC2, TARBP2, ATXN7L3B, BTG1, SLC25A17, CRY1, RTCB, AQP5, TIMP3, TEF, POMC, RAB10, HADHA, MB, NAGA, EIF3D, CIB4, IFT27, QRFP, RHOB, RBKS, RP…
3:12700795:95542489	3	12700795	95542489	82.8417	2279		, IL22, IFNG, SLC2A3, CLHC1, AVPR1A, FSHR, PAEP, EPCAM, CALM2, CDK4, CD4, ABCG8, GAPDH, CD9, MIP, TIMELESS, IL23A, QPCT, URM1, CCND2, CDK2, TSPAN9, MMP19, AK1, SLC25A3, CNGA3, CIAO1, PTGS1, GGTA1, ARL1, MYF6, HPCAL1, C3H12orf29, DCN, NDUFA12, CBX5, HOXC6, ATP5MC2, TARBP2, ATXN7L3B, BTG1, SLC25A17, CRY1, RTCB, AQP5, TIMP3, TEF, POMC, RAB10, HADHA, MB, NAGA, EIF3D, CIB4, IFT27, QRFP, RHOB, RBKS, RP…
3:131139732:132786022	3	131139732	132786022	1.64629	2279		, IL22, IFNG, SLC2A3, CLHC1, AVPR1A, FSHR, PAEP, EPCAM, CALM2, CDK4, CD4, ABCG8, GAPDH, CD9, MIP, TIMELESS, IL23A, QPCT, URM1, CCND2, CDK2, TSPAN9, MMP19, AK1, SLC25A3, CNGA3, CIAO1, PTGS1, GGTA1, ARL1, MYF6, HPCAL1, C3H12orf29, DCN, NDUFA12, CBX5, HOXC6, ATP5MC2, TARBP2, ATXN7L3B, BTG1, SLC25A17, CRY1, RTCB, AQP5, TIMP3, TEF, POMC, RAB10, HADHA, MB, NAGA, EIF3D, CIB4, IFT27, QRFP, RHOB, RBKS, RP…
3:135473242:136865536	3	135473242	136865536	1.39229	2279		, IL22, IFNG, SLC2A3, CLHC1, AVPR1A, FSHR, PAEP, EPCAM, CALM2, CDK4, CD4, ABCG8, GAPDH, CD9, MIP, TIMELESS, IL23A, QPCT, URM1, CCND2, CDK2, TSPAN9, MMP19, AK1, SLC25A3, CNGA3, CIAO1, PTGS1, GGTA1, ARL1, MYF6, HPCAL1, C3H12orf29, DCN, NDUFA12, CBX5, HOXC6, ATP5MC2, TARBP2, ATXN7L3B, BTG1, SLC25A17, CRY1, RTCB, AQP5, TIMP3, TEF, POMC, RAB10, HADHA, MB, NAGA, EIF3D, CIB4, IFT27, QRFP, RHOB, RBKS, RP…
3:136948456:137196634	3	136948456	137196634	0.248178	2279		, IL22, IFNG, SLC2A3, CLHC1, AVPR1A, FSHR, PAEP, EPCAM, CALM2, CDK4, CD4, ABCG8, GAPDH, CD9, MIP, TIMELESS, IL23A, QPCT, URM1, CCND2, CDK2, TSPAN9, MMP19, AK1, SLC25A3, CNGA3, CIAO1, PTGS1, GGTA1, ARL1, MYF6, HPCAL1, C3H12orf29, DCN, NDUFA12, CBX5, HOXC6, ATP5MC2, TARBP2, ATXN7L3B, BTG1, SLC25A17, CRY1, RTCB, AQP5, TIMP3, TEF, POMC, RAB10, HADHA, MB, NAGA, EIF3D, CIB4, IFT27, QRFP, RHOB, RBKS, RP…
3:137820114:137923041	3	137820114	137923041	0.102927	2279		, IL22, IFNG, SLC2A3, CLHC1, AVPR1A, FSHR, PAEP, EPCAM, CALM2, CDK4, CD4, ABCG8, GAPDH, CD9, MIP, TIMELESS, IL23A, QPCT, URM1, CCND2, CDK2, TSPAN9, MMP19, AK1, SLC25A3, CNGA3, CIAO1, PTGS1, GGTA1, ARL1, MYF6, HPCAL1, C3H12orf29, DCN, NDUFA12, CBX5, HOXC6, ATP5MC2, TARBP2, ATXN7L3B, BTG1, SLC25A17, CRY1, RTCB, AQP5, TIMP3, TEF, POMC, RAB10, HADHA, MB, NAGA, EIF3D, CIB4, IFT27, QRFP, RHOB, RBKS, RP…
3:138052549:138864086	3	138052549	138864086	0.811537	2279		, IL22, IFNG, SLC2A3, CLHC1, AVPR1A, FSHR, PAEP, EPCAM, CALM2, CDK4, CD4, ABCG8, GAPDH, CD9, MIP, TIMELESS, IL23A, QPCT, URM1, CCND2, CDK2, TSPAN9, MMP19, AK1, SLC25A3, CNGA3, CIAO1, PTGS1, GGTA1, ARL1, MYF6, HPCAL1, C3H12orf29, DCN, NDUFA12, CBX5, HOXC6, ATP5MC2, TARBP2, ATXN7L3B, BTG1, SLC25A17, CRY1, RTCB, AQP5, TIMP3, TEF, POMC, RAB10, HADHA, MB, NAGA, EIF3D, CIB4, IFT27, QRFP, RHOB, RBKS, RP…
3:139261524:171009670	3	139261524	171009670	31.7481	2279		, IL22, IFNG, SLC2A3, CLHC1, AVPR1A, FSHR, PAEP, EPCAM, CALM2, CDK4, CD4, ABCG8, GAPDH, CD9, MIP, TIMELESS, IL23A, QPCT, URM1, CCND2, CDK2, TSPAN9, MMP19, AK1, SLC25A3, CNGA3, CIAO1, PTGS1, GGTA1, ARL1, MYF6, HPCAL1, C3H12orf29, DCN, NDUFA12, CBX5, HOXC6, ATP5MC2, TARBP2, ATXN7L3B, BTG1, SLC25A17, CRY1, RTCB, AQP5, TIMP3, TEF, POMC, RAB10, HADHA, MB, NAGA, EIF3D, CIB4, IFT27, QRFP, RHOB, RBKS, RP…
3:171854100:172775304	3	171854100	172775304	0.921204	2279		, IL22, IFNG, SLC2A3, CLHC1, AVPR1A, FSHR, PAEP, EPCAM, CALM2, CDK4, CD4, ABCG8, GAPDH, CD9, MIP, TIMELESS, IL23A, QPCT, URM1, CCND2, CDK2, TSPAN9, MMP19, AK1, SLC25A3, CNGA3, CIAO1, PTGS1, GGTA1, ARL1, MYF6, HPCAL1, C3H12orf29, DCN, NDUFA12, CBX5, HOXC6, ATP5MC2, TARBP2, ATXN7L3B, BTG1, SLC25A17, CRY1, RTCB, AQP5, TIMP3, TEF, POMC, RAB10, HADHA, MB, NAGA, EIF3D, CIB4, IFT27, QRFP, RHOB, RBKS, RP…
3:174156180:188004476	3	174156180	188004476	13.8483	2279		, IL22, IFNG, SLC2A3, CLHC1, AVPR1A, FSHR, PAEP, EPCAM, CALM2, CDK4, CD4, ABCG8, GAPDH, CD9, MIP, TIMELESS, IL23A, QPCT, URM1, CCND2, CDK2, TSPAN9, MMP19, AK1, SLC25A3, CNGA3, CIAO1, PTGS1, GGTA1, ARL1, MYF6, HPCAL1, C3H12orf29, DCN, NDUFA12, CBX5, HOXC6, ATP5MC2, TARBP2, ATXN7L3B, BTG1, SLC25A17, CRY1, RTCB, AQP5, TIMP3, TEF, POMC, RAB10, HADHA, MB, NAGA, EIF3D, CIB4, IFT27, QRFP, RHOB, RBKS, RP…
3:188479155:195036854	3	188479155	195036854	6.5577	2279		, IL22, IFNG, SLC2A3, CLHC1, AVPR1A, FSHR, PAEP, EPCAM, CALM2, CDK4, CD4, ABCG8, GAPDH, CD9, MIP, TIMELESS, IL23A, QPCT, URM1, CCND2, CDK2, TSPAN9, MMP19, AK1, SLC25A3, CNGA3, CIAO1, PTGS1, GGTA1, ARL1, MYF6, HPCAL1, C3H12orf29, DCN, NDUFA12, CBX5, HOXC6, ATP5MC2, TARBP2, ATXN7L3B, BTG1, SLC25A17, CRY1, RTCB, AQP5, TIMP3, TEF, POMC, RAB10, HADHA, MB, NAGA, EIF3D, CIB4, IFT27, QRFP, RHOB, RBKS, RP…
3:195291305:200017061	3	195291305	200017061	4.72576	2279		, IL22, IFNG, SLC2A3, CLHC1, AVPR1A, FSHR, PAEP, EPCAM, CALM2, CDK4, CD4, ABCG8, GAPDH, CD9, MIP, TIMELESS, IL23A, QPCT, URM1, CCND2, CDK2, TSPAN9, MMP19, AK1, SLC25A3, CNGA3, CIAO1, PTGS1, GGTA1, ARL1, MYF6, HPCAL1, C3H12orf29, DCN, NDUFA12, CBX5, HOXC6, ATP5MC2, TARBP2, ATXN7L3B, BTG1, SLC25A17, CRY1, RTCB, AQP5, TIMP3, TEF, POMC, RAB10, HADHA, MB, NAGA, EIF3D, CIB4, IFT27, QRFP, RHOB, RBKS, RP…
3:202173942:211562241	3	202173942	211562241	9.3883	2279		, IL22, IFNG, SLC2A3, CLHC1, AVPR1A, FSHR, PAEP, EPCAM, CALM2, CDK4, CD4, ABCG8, GAPDH, CD9, MIP, TIMELESS, IL23A, QPCT, URM1, CCND2, CDK2, TSPAN9, MMP19, AK1, SLC25A3, CNGA3, CIAO1, PTGS1, GGTA1, ARL1, MYF6, HPCAL1, C3H12orf29, DCN, NDUFA12, CBX5, HOXC6, ATP5MC2, TARBP2, ATXN7L3B, BTG1, SLC25A17, CRY1, RTCB, AQP5, TIMP3, TEF, POMC, RAB10, HADHA, MB, NAGA, EIF3D, CIB4, IFT27, QRFP, RHOB, RBKS, RP…
3:211998144:213423457	3	211998144	213423457	1.42531	2279		, IL22, IFNG, SLC2A3, CLHC1, AVPR1A, FSHR, PAEP, EPCAM, CALM2, CDK4, CD4, ABCG8, GAPDH, CD9, MIP, TIMELESS, IL23A, QPCT, URM1, CCND2, CDK2, TSPAN9, MMP19, AK1, SLC25A3, CNGA3, CIAO1, PTGS1, GGTA1, ARL1, MYF6, HPCAL1, C3H12orf29, DCN, NDUFA12, CBX5, HOXC6, ATP5MC2, TARBP2, ATXN7L3B, BTG1, SLC25A17, CRY1, RTCB, AQP5, TIMP3, TEF, POMC, RAB10, HADHA, MB, NAGA, EIF3D, CIB4, IFT27, QRFP, RHOB, RBKS, RP…
3:213557478:214153251	3	213557478	214153251	0.595773	2279		, IL22, IFNG, SLC2A3, CLHC1, AVPR1A, FSHR, PAEP, EPCAM, CALM2, CDK4, CD4, ABCG8, GAPDH, CD9, MIP, TIMELESS, IL23A, QPCT, URM1, CCND2, CDK2, TSPAN9, MMP19, AK1, SLC25A3, CNGA3, CIAO1, PTGS1, GGTA1, ARL1, MYF6, HPCAL1, C3H12orf29, DCN, NDUFA12, CBX5, HOXC6, ATP5MC2, TARBP2, ATXN7L3B, BTG1, SLC25A17, CRY1, RTCB, AQP5, TIMP3, TEF, POMC, RAB10, HADHA, MB, NAGA, EIF3D, CIB4, IFT27, QRFP, RHOB, RBKS, RP…
3:215448612:216992810	3	215448612	216992810	1.5442	2279		, IL22, IFNG, SLC2A3, CLHC1, AVPR1A, FSHR, PAEP, EPCAM, CALM2, CDK4, CD4, ABCG8, GAPDH, CD9, MIP, TIMELESS, IL23A, QPCT, URM1, CCND2, CDK2, TSPAN9, MMP19, AK1, SLC25A3, CNGA3, CIAO1, PTGS1, GGTA1, ARL1, MYF6, HPCAL1, C3H12orf29, DCN, NDUFA12, CBX5, HOXC6, ATP5MC2, TARBP2, ATXN7L3B, BTG1, SLC25A17, CRY1, RTCB, AQP5, TIMP3, TEF, POMC, RAB10, HADHA, MB, NAGA, EIF3D, CIB4, IFT27, QRFP, RHOB, RBKS, RP…
3:218139642:236040245	3	218139642	236040245	17.9006	2279		, IL22, IFNG, SLC2A3, CLHC1, AVPR1A, FSHR, PAEP, EPCAM, CALM2, CDK4, CD4, ABCG8, GAPDH, CD9, MIP, TIMELESS, IL23A, QPCT, URM1, CCND2, CDK2, TSPAN9, MMP19, AK1, SLC25A3, CNGA3, CIAO1, PTGS1, GGTA1, ARL1, MYF6, HPCAL1, C3H12orf29, DCN, NDUFA12, CBX5, HOXC6, ATP5MC2, TARBP2, ATXN7L3B, BTG1, SLC25A17, CRY1, RTCB, AQP5, TIMP3, TEF, POMC, RAB10, HADHA, MB, NAGA, EIF3D, CIB4, IFT27, QRFP, RHOB, RBKS, RP…
3:236157277:236230573	3	236157277	236230573	0.073296	2279		, IL22, IFNG, SLC2A3, CLHC1, AVPR1A, FSHR, PAEP, EPCAM, CALM2, CDK4, CD4, ABCG8, GAPDH, CD9, MIP, TIMELESS, IL23A, QPCT, URM1, CCND2, CDK2, TSPAN9, MMP19, AK1, SLC25A3, CNGA3, CIAO1, PTGS1, GGTA1, ARL1, MYF6, HPCAL1, C3H12orf29, DCN, NDUFA12, CBX5, HOXC6, ATP5MC2, TARBP2, ATXN7L3B, BTG1, SLC25A17, CRY1, RTCB, AQP5, TIMP3, TEF, POMC, RAB10, HADHA, MB, NAGA, EIF3D, CIB4, IFT27, QRFP, RHOB, RBKS, RP…
3:236333348:242770439	3	236333348	242770439	6.43709	2279		, IL22, IFNG, SLC2A3, CLHC1, AVPR1A, FSHR, PAEP, EPCAM, CALM2, CDK4, CD4, ABCG8, GAPDH, CD9, MIP, TIMELESS, IL23A, QPCT, URM1, CCND2, CDK2, TSPAN9, MMP19, AK1, SLC25A3, CNGA3, CIAO1, PTGS1, GGTA1, ARL1, MYF6, HPCAL1, C3H12orf29, DCN, NDUFA12, CBX5, HOXC6, ATP5MC2, TARBP2, ATXN7L3B, BTG1, SLC25A17, CRY1, RTCB, AQP5, TIMP3, TEF, POMC, RAB10, HADHA, MB, NAGA, EIF3D, CIB4, IFT27, QRFP, RHOB, RBKS, RP…
3:92590:8626722	3	92590	8626722	8.53413	2279		, IL22, IFNG, SLC2A3, CLHC1, AVPR1A, FSHR, PAEP, EPCAM, CALM2, CDK4, CD4, ABCG8, GAPDH, CD9, MIP, TIMELESS, IL23A, QPCT, URM1, CCND2, CDK2, TSPAN9, MMP19, AK1, SLC25A3, CNGA3, CIAO1, PTGS1, GGTA1, ARL1, MYF6, HPCAL1, C3H12orf29, DCN, NDUFA12, CBX5, HOXC6, ATP5MC2, TARBP2, ATXN7L3B, BTG1, SLC25A17, CRY1, RTCB, AQP5, TIMP3, TEF, POMC, RAB10, HADHA, MB, NAGA, EIF3D, CIB4, IFT27, QRFP, RHOB, RBKS, RP…
3:95879452:96040194	3	95879452	96040194	0.160742	2279		, IL22, IFNG, SLC2A3, CLHC1, AVPR1A, FSHR, PAEP, EPCAM, CALM2, CDK4, CD4, ABCG8, GAPDH, CD9, MIP, TIMELESS, IL23A, QPCT, URM1, CCND2, CDK2, TSPAN9, MMP19, AK1, SLC25A3, CNGA3, CIAO1, PTGS1, GGTA1, ARL1, MYF6, HPCAL1, C3H12orf29, DCN, NDUFA12, CBX5, HOXC6, ATP5MC2, TARBP2, ATXN7L3B, BTG1, SLC25A17, CRY1, RTCB, AQP5, TIMP3, TEF, POMC, RAB10, HADHA, MB, NAGA, EIF3D, CIB4, IFT27, QRFP, RHOB, RBKS, RP…
3:96694890:119432477	3	96694890	119432477	22.7376	2279		, IL22, IFNG, SLC2A3, CLHC1, AVPR1A, FSHR, PAEP, EPCAM, CALM2, CDK4, CD4, ABCG8, GAPDH, CD9, MIP, TIMELESS, IL23A, QPCT, URM1, CCND2, CDK2, TSPAN9, MMP19, AK1, SLC25A3, CNGA3, CIAO1, PTGS1, GGTA1, ARL1, MYF6, HPCAL1, C3H12orf29, DCN, NDUFA12, CBX5, HOXC6, ATP5MC2, TARBP2, ATXN7L3B, BTG1, SLC25A17, CRY1, RTCB, AQP5, TIMP3, TEF, POMC, RAB10, HADHA, MB, NAGA, EIF3D, CIB4, IFT27, QRFP, RHOB, RBKS, RP…
4:39569644:44700812	4	39569644	44700812	5.13117	965		, RELN, MET, GNG11, ARF5, PEG10, CDK5, PON2, RHEB, CHCHD3, SLC26A3, LSM5, GHRHR, AQP1, ARL4A, PRR15, CTTNBP2, NPVF, SRI, IL6, IGFBP3, IGFBP1, TRA2A, GCK, INHBA, CFTR, ASZ1, WNT2, ST7, SNORD31, 5S_rRNA, U6, oar-mir-148a, 7SK, U3, Y_RNA, U4, U7, SNORD82, Vault, U1, SNORA62, SNORA70
4:44904532:50589132	4	44904532	50589132	5.6846	965		, RELN, MET, GNG11, ARF5, PEG10, CDK5, PON2, RHEB, CHCHD3, SLC26A3, LSM5, GHRHR, AQP1, ARL4A, PRR15, CTTNBP2, NPVF, SRI, IL6, IGFBP3, IGFBP1, TRA2A, GCK, INHBA, CFTR, ASZ1, WNT2, ST7, SNORD31, 5S_rRNA, U6, oar-mir-148a, 7SK, U3, Y_RNA, U4, U7, SNORD82, Vault, U1, SNORA62, SNORA70
4:50835404:51441757	4	50835404	51441757	0.606353	965		, RELN, MET, GNG11, ARF5, PEG10, CDK5, PON2, RHEB, CHCHD3, SLC26A3, LSM5, GHRHR, AQP1, ARL4A, PRR15, CTTNBP2, NPVF, SRI, IL6, IGFBP3, IGFBP1, TRA2A, GCK, INHBA, CFTR, ASZ1, WNT2, ST7, SNORD31, 5S_rRNA, U6, oar-mir-148a, 7SK, U3, Y_RNA, U4, U7, SNORD82, Vault, U1, SNORA62, SNORA70
4:5193114:38383717	4	5193114	38383717	33.1906	965		, RELN, MET, GNG11, ARF5, PEG10, CDK5, PON2, RHEB, CHCHD3, SLC26A3, LSM5, GHRHR, AQP1, ARL4A, PRR15, CTTNBP2, NPVF, SRI, IL6, IGFBP3, IGFBP1, TRA2A, GCK, INHBA, CFTR, ASZ1, WNT2, ST7, SNORD31, 5S_rRNA, U6, oar-mir-148a, 7SK, U3, Y_RNA, U4, U7, SNORD82, Vault, U1, SNORA62, SNORA70
4:53218410:53218410	4	53218410	53218410	0	965		, RELN, MET, GNG11, ARF5, PEG10, CDK5, PON2, RHEB, CHCHD3, SLC26A3, LSM5, GHRHR, AQP1, ARL4A, PRR15, CTTNBP2, NPVF, SRI, IL6, IGFBP3, IGFBP1, TRA2A, GCK, INHBA, CFTR, ASZ1, WNT2, ST7, SNORD31, 5S_rRNA, U6, oar-mir-148a, 7SK, U3, Y_RNA, U4, U7, SNORD82, Vault, U1, SNORA62, SNORA70
4:54269759:127201684	4	54269759	127201684	72.9319	965		, RELN, MET, GNG11, ARF5, PEG10, CDK5, PON2, RHEB, CHCHD3, SLC26A3, LSM5, GHRHR, AQP1, ARL4A, PRR15, CTTNBP2, NPVF, SRI, IL6, IGFBP3, IGFBP1, TRA2A, GCK, INHBA, CFTR, ASZ1, WNT2, ST7, SNORD31, 5S_rRNA, U6, oar-mir-148a, 7SK, U3, Y_RNA, U4, U7, SNORD82, Vault, U1, SNORA62, SNORA70
4:90119:4482317	4	90119	4482317	4.3922	965		, RELN, MET, GNG11, ARF5, PEG10, CDK5, PON2, RHEB, CHCHD3, SLC26A3, LSM5, GHRHR, AQP1, ARL4A, PRR15, CTTNBP2, NPVF, SRI, IL6, IGFBP3, IGFBP1, TRA2A, GCK, INHBA, CFTR, ASZ1, WNT2, ST7, SNORD31, 5S_rRNA, U6, oar-mir-148a, 7SK, U3, Y_RNA, U4, U7, SNORD82, Vault, U1, SNORA62, SNORA70
5:17758698:17758698	5	17758698	17758698	0	1356		, RAB8A, CYP4F21, NR3C1, RETN, SQSTM1, MAP2K7, ELAVL1, CCL25, SCGB3A2, SLC34A1, ZNF333, B4GALT7, SLC26A2, PRKACA, ARF1, PROP1, RACK1, ZNF496, MYOZ3, MADCAM1, SPARC, ATOX1, PLIN5, HAND1, PRDX2, ASNA1, UBA52, IL12B, GDF9, IFI30, PURA, SLC39A3, VDAC1, GABRB2, IL12RB1, ADRB2, TXNDC15, FBXL21P, IL4, IL13, INSL3, IL5, IRF1, EIF3G, DNMT1, CSF2, IL3, ICAM1, MEF2C, EGR1, BST-2B, SLC12A2, CAST, CNN1, ACP5,…
5:17964499:41238558	5	17964499	41238558	23.2741	1356		, RAB8A, CYP4F21, NR3C1, RETN, SQSTM1, MAP2K7, ELAVL1, CCL25, SCGB3A2, SLC34A1, ZNF333, B4GALT7, SLC26A2, PRKACA, ARF1, PROP1, RACK1, ZNF496, MYOZ3, MADCAM1, SPARC, ATOX1, PLIN5, HAND1, PRDX2, ASNA1, UBA52, IL12B, GDF9, IFI30, PURA, SLC39A3, VDAC1, GABRB2, IL12RB1, ADRB2, TXNDC15, FBXL21P, IL4, IL13, INSL3, IL5, IRF1, EIF3G, DNMT1, CSF2, IL3, ICAM1, MEF2C, EGR1, BST-2B, SLC12A2, CAST, CNN1, ACP5,…
5:201561:17660264	5	201561	17660264	17.4587	1356		, RAB8A, CYP4F21, NR3C1, RETN, SQSTM1, MAP2K7, ELAVL1, CCL25, SCGB3A2, SLC34A1, ZNF333, B4GALT7, SLC26A2, PRKACA, ARF1, PROP1, RACK1, ZNF496, MYOZ3, MADCAM1, SPARC, ATOX1, PLIN5, HAND1, PRDX2, ASNA1, UBA52, IL12B, GDF9, IFI30, PURA, SLC39A3, VDAC1, GABRB2, IL12RB1, ADRB2, TXNDC15, FBXL21P, IL4, IL13, INSL3, IL5, IRF1, EIF3G, DNMT1, CSF2, IL3, ICAM1, MEF2C, EGR1, BST-2B, SLC12A2, CAST, CNN1, ACP5,…
5:41841285:43775137	5	41841285	43775137	1.93385	1356		, RAB8A, CYP4F21, NR3C1, RETN, SQSTM1, MAP2K7, ELAVL1, CCL25, SCGB3A2, SLC34A1, ZNF333, B4GALT7, SLC26A2, PRKACA, ARF1, PROP1, RACK1, ZNF496, MYOZ3, MADCAM1, SPARC, ATOX1, PLIN5, HAND1, PRDX2, ASNA1, UBA52, IL12B, GDF9, IFI30, PURA, SLC39A3, VDAC1, GABRB2, IL12RB1, ADRB2, TXNDC15, FBXL21P, IL4, IL13, INSL3, IL5, IRF1, EIF3G, DNMT1, CSF2, IL3, ICAM1, MEF2C, EGR1, BST-2B, SLC12A2, CAST, CNN1, ACP5,…
5:44211322:44313033	5	44211322	44313033	0.101711	1356		, RAB8A, CYP4F21, NR3C1, RETN, SQSTM1, MAP2K7, ELAVL1, CCL25, SCGB3A2, SLC34A1, ZNF333, B4GALT7, SLC26A2, PRKACA, ARF1, PROP1, RACK1, ZNF496, MYOZ3, MADCAM1, SPARC, ATOX1, PLIN5, HAND1, PRDX2, ASNA1, UBA52, IL12B, GDF9, IFI30, PURA, SLC39A3, VDAC1, GABRB2, IL12RB1, ADRB2, TXNDC15, FBXL21P, IL4, IL13, INSL3, IL5, IRF1, EIF3G, DNMT1, CSF2, IL3, ICAM1, MEF2C, EGR1, BST-2B, SLC12A2, CAST, CNN1, ACP5,…
5:44580597:48573033	5	44580597	48573033	3.99244	1356		, RAB8A, CYP4F21, NR3C1, RETN, SQSTM1, MAP2K7, ELAVL1, CCL25, SCGB3A2, SLC34A1, ZNF333, B4GALT7, SLC26A2, PRKACA, ARF1, PROP1, RACK1, ZNF496, MYOZ3, MADCAM1, SPARC, ATOX1, PLIN5, HAND1, PRDX2, ASNA1, UBA52, IL12B, GDF9, IFI30, PURA, SLC39A3, VDAC1, GABRB2, IL12RB1, ADRB2, TXNDC15, FBXL21P, IL4, IL13, INSL3, IL5, IRF1, EIF3G, DNMT1, CSF2, IL3, ICAM1, MEF2C, EGR1, BST-2B, SLC12A2, CAST, CNN1, ACP5,…
5:48743755:58554426	5	48743755	58554426	9.81067	1356		, RAB8A, CYP4F21, NR3C1, RETN, SQSTM1, MAP2K7, ELAVL1, CCL25, SCGB3A2, SLC34A1, ZNF333, B4GALT7, SLC26A2, PRKACA, ARF1, PROP1, RACK1, ZNF496, MYOZ3, MADCAM1, SPARC, ATOX1, PLIN5, HAND1, PRDX2, ASNA1, UBA52, IL12B, GDF9, IFI30, PURA, SLC39A3, VDAC1, GABRB2, IL12RB1, ADRB2, TXNDC15, FBXL21P, IL4, IL13, INSL3, IL5, IRF1, EIF3G, DNMT1, CSF2, IL3, ICAM1, MEF2C, EGR1, BST-2B, SLC12A2, CAST, CNN1, ACP5,…
5:58814739:60452078	5	58814739	60452078	1.63734	1356		, RAB8A, CYP4F21, NR3C1, RETN, SQSTM1, MAP2K7, ELAVL1, CCL25, SCGB3A2, SLC34A1, ZNF333, B4GALT7, SLC26A2, PRKACA, ARF1, PROP1, RACK1, ZNF496, MYOZ3, MADCAM1, SPARC, ATOX1, PLIN5, HAND1, PRDX2, ASNA1, UBA52, IL12B, GDF9, IFI30, PURA, SLC39A3, VDAC1, GABRB2, IL12RB1, ADRB2, TXNDC15, FBXL21P, IL4, IL13, INSL3, IL5, IRF1, EIF3G, DNMT1, CSF2, IL3, ICAM1, MEF2C, EGR1, BST-2B, SLC12A2, CAST, CNN1, ACP5,…
5:62866258:92428277	5	62866258	92428277	29.562	1356		, RAB8A, CYP4F21, NR3C1, RETN, SQSTM1, MAP2K7, ELAVL1, CCL25, SCGB3A2, SLC34A1, ZNF333, B4GALT7, SLC26A2, PRKACA, ARF1, PROP1, RACK1, ZNF496, MYOZ3, MADCAM1, SPARC, ATOX1, PLIN5, HAND1, PRDX2, ASNA1, UBA52, IL12B, GDF9, IFI30, PURA, SLC39A3, VDAC1, GABRB2, IL12RB1, ADRB2, TXNDC15, FBXL21P, IL4, IL13, INSL3, IL5, IRF1, EIF3G, DNMT1, CSF2, IL3, ICAM1, MEF2C, EGR1, BST-2B, SLC12A2, CAST, CNN1, ACP5,…
5:92468889:116996412	5	92468889	116996412	24.5275	1356		, RAB8A, CYP4F21, NR3C1, RETN, SQSTM1, MAP2K7, ELAVL1, CCL25, SCGB3A2, SLC34A1, ZNF333, B4GALT7, SLC26A2, PRKACA, ARF1, PROP1, RACK1, ZNF496, MYOZ3, MADCAM1, SPARC, ATOX1, PLIN5, HAND1, PRDX2, ASNA1, UBA52, IL12B, GDF9, IFI30, PURA, SLC39A3, VDAC1, GABRB2, IL12RB1, ADRB2, TXNDC15, FBXL21P, IL4, IL13, INSL3, IL5, IRF1, EIF3G, DNMT1, CSF2, IL3, ICAM1, MEF2C, EGR1, BST-2B, SLC12A2, CAST, CNN1, ACP5,…
6:102282037:128148043	6	102282037	128148043	25.866	778		, TLR10, TLR1, TLR6, RHOH, KDR, SCD5, CLOCK, ABCG2, SPP1, IGFBP7, GNRHR, RAB28, UGT2B7, CSN1S1, CSN2, CSN1S2, CSN3, BLOC1S4, LIAS, ALB, H2AZ1, HTT, CXCL8, CXCL1, RCHY1, CXCL10, MYOZ2, BMPR1B, U6, 5S_rRNA, SNORA70, SNORD42, 7SK, U1, U4
6:122378:15289467	6	122378	15289467	15.1671	778		, TLR10, TLR1, TLR6, RHOH, KDR, SCD5, CLOCK, ABCG2, SPP1, IGFBP7, GNRHR, RAB28, UGT2B7, CSN1S1, CSN2, CSN1S2, CSN3, BLOC1S4, LIAS, ALB, H2AZ1, HTT, CXCL8, CXCL1, RCHY1, CXCL10, MYOZ2, BMPR1B, U6, 5S_rRNA, SNORA70, SNORD42, 7SK, U1, U4
6:15450053:15450053	6	15450053	15450053	0	778		, TLR10, TLR1, TLR6, RHOH, KDR, SCD5, CLOCK, ABCG2, SPP1, IGFBP7, GNRHR, RAB28, UGT2B7, CSN1S1, CSN2, CSN1S2, CSN3, BLOC1S4, LIAS, ALB, H2AZ1, HTT, CXCL8, CXCL1, RCHY1, CXCL10, MYOZ2, BMPR1B, U6, 5S_rRNA, SNORA70, SNORD42, 7SK, U1, U4
6:15846520:17614152	6	15846520	17614152	1.76763	778		, TLR10, TLR1, TLR6, RHOH, KDR, SCD5, CLOCK, ABCG2, SPP1, IGFBP7, GNRHR, RAB28, UGT2B7, CSN1S1, CSN2, CSN1S2, CSN3, BLOC1S4, LIAS, ALB, H2AZ1, HTT, CXCL8, CXCL1, RCHY1, CXCL10, MYOZ2, BMPR1B, U6, 5S_rRNA, SNORA70, SNORD42, 7SK, U1, U4
6:17715092:37861888	6	17715092	37861888	20.1468	778		, TLR10, TLR1, TLR6, RHOH, KDR, SCD5, CLOCK, ABCG2, SPP1, IGFBP7, GNRHR, RAB28, UGT2B7, CSN1S1, CSN2, CSN1S2, CSN3, BLOC1S4, LIAS, ALB, H2AZ1, HTT, CXCL8, CXCL1, RCHY1, CXCL10, MYOZ2, BMPR1B, U6, 5S_rRNA, SNORA70, SNORD42, 7SK, U1, U4
6:38439622:69728277	6	38439622	69728277	31.2887	778		, TLR10, TLR1, TLR6, RHOH, KDR, SCD5, CLOCK, ABCG2, SPP1, IGFBP7, GNRHR, RAB28, UGT2B7, CSN1S1, CSN2, CSN1S2, CSN3, BLOC1S4, LIAS, ALB, H2AZ1, HTT, CXCL8, CXCL1, RCHY1, CXCL10, MYOZ2, BMPR1B, U6, 5S_rRNA, SNORA70, SNORD42, 7SK, U1, U4
6:69833798:82430062	6	69833798	82430062	12.5963	778		, TLR10, TLR1, TLR6, RHOH, KDR, SCD5, CLOCK, ABCG2, SPP1, IGFBP7, GNRHR, RAB28, UGT2B7, CSN1S1, CSN2, CSN1S2, CSN3, BLOC1S4, LIAS, ALB, H2AZ1, HTT, CXCL8, CXCL1, RCHY1, CXCL10, MYOZ2, BMPR1B, U6, 5S_rRNA, SNORA70, SNORD42, 7SK, U1, U4
6:82536030:101672848	6	82536030	101672848	19.1368	778		, TLR10, TLR1, TLR6, RHOH, KDR, SCD5, CLOCK, ABCG2, SPP1, IGFBP7, GNRHR, RAB28, UGT2B7, CSN1S1, CSN2, CSN1S2, CSN3, BLOC1S4, LIAS, ALB, H2AZ1, HTT, CXCL8, CXCL1, RCHY1, CXCL10, MYOZ2, BMPR1B, U6, 5S_rRNA, SNORA70, SNORD42, 7SK, U1, U4
7:103728716:108923470	7	103728716	108923470	5.19475	1087		, ARF6, FOS, CIPC, SLIRP, TSHR, B2M, SFXN1, GSTA1, CLN6, HEXA, IL25, MMP14, SLC39A2, RHOV, CAPN3, PYGL, TPM1, ANXA2, CYP19, TRPM7, FGF7, SLC24A5, DUOX2, BMP4, SIX6, SIX1, ESR2, 7SK, U1, 5S_rRNA, SNORA66, U4, SNORD22, U6, Y_RNA, U7, SNORD16, Metazoa_SRP, SNORD18, SNORA62, U5, U2, SNORA70, RNaseP_nuc, SNORA72
7:10951847:11189605	7	10951847	11189605	0.237758	1087		, ARF6, FOS, CIPC, SLIRP, TSHR, B2M, SFXN1, GSTA1, CLN6, HEXA, IL25, MMP14, SLC39A2, RHOV, CAPN3, PYGL, TPM1, ANXA2, CYP19, TRPM7, FGF7, SLC24A5, DUOX2, BMP4, SIX6, SIX1, ESR2, 7SK, U1, 5S_rRNA, SNORA66, U4, SNORD22, U6, Y_RNA, U7, SNORD16, Metazoa_SRP, SNORD18, SNORA62, U5, U2, SNORA70, RNaseP_nuc, SNORA72
7:11534229:13714646	7	11534229	13714646	2.18042	1087		, ARF6, FOS, CIPC, SLIRP, TSHR, B2M, SFXN1, GSTA1, CLN6, HEXA, IL25, MMP14, SLC39A2, RHOV, CAPN3, PYGL, TPM1, ANXA2, CYP19, TRPM7, FGF7, SLC24A5, DUOX2, BMP4, SIX6, SIX1, ESR2, 7SK, U1, 5S_rRNA, SNORA66, U4, SNORD22, U6, Y_RNA, U7, SNORD16, Metazoa_SRP, SNORD18, SNORA62, U5, U2, SNORA70, RNaseP_nuc, SNORA72
7:1209841:1907137	7	1209841	1907137	0.697296	1087		, ARF6, FOS, CIPC, SLIRP, TSHR, B2M, SFXN1, GSTA1, CLN6, HEXA, IL25, MMP14, SLC39A2, RHOV, CAPN3, PYGL, TPM1, ANXA2, CYP19, TRPM7, FGF7, SLC24A5, DUOX2, BMP4, SIX6, SIX1, ESR2, 7SK, U1, 5S_rRNA, SNORA66, U4, SNORD22, U6, Y_RNA, U7, SNORD16, Metazoa_SRP, SNORD18, SNORA62, U5, U2, SNORA70, RNaseP_nuc, SNORA72
7:14505016:22494330	7	14505016	22494330	7.98931	1087		, ARF6, FOS, CIPC, SLIRP, TSHR, B2M, SFXN1, GSTA1, CLN6, HEXA, IL25, MMP14, SLC39A2, RHOV, CAPN3, PYGL, TPM1, ANXA2, CYP19, TRPM7, FGF7, SLC24A5, DUOX2, BMP4, SIX6, SIX1, ESR2, 7SK, U1, 5S_rRNA, SNORA66, U4, SNORD22, U6, Y_RNA, U7, SNORD16, Metazoa_SRP, SNORD18, SNORA62, U5, U2, SNORA70, RNaseP_nuc, SNORA72
7:2106844:10168544	7	2106844	10168544	8.0617	1087		, ARF6, FOS, CIPC, SLIRP, TSHR, B2M, SFXN1, GSTA1, CLN6, HEXA, IL25, MMP14, SLC39A2, RHOV, CAPN3, PYGL, TPM1, ANXA2, CYP19, TRPM7, FGF7, SLC24A5, DUOX2, BMP4, SIX6, SIX1, ESR2, 7SK, U1, 5S_rRNA, SNORA66, U4, SNORD22, U6, Y_RNA, U7, SNORD16, Metazoa_SRP, SNORD18, SNORA62, U5, U2, SNORA70, RNaseP_nuc, SNORA72
7:22509957:92088559	7	22509957	92088559	69.5786	1087		, ARF6, FOS, CIPC, SLIRP, TSHR, B2M, SFXN1, GSTA1, CLN6, HEXA, IL25, MMP14, SLC39A2, RHOV, CAPN3, PYGL, TPM1, ANXA2, CYP19, TRPM7, FGF7, SLC24A5, DUOX2, BMP4, SIX6, SIX1, ESR2, 7SK, U1, 5S_rRNA, SNORA66, U4, SNORD22, U6, Y_RNA, U7, SNORD16, Metazoa_SRP, SNORD18, SNORA62, U5, U2, SNORA70, RNaseP_nuc, SNORA72
7:92327636:92706999	7	92327636	92706999	0.379363	1087		, ARF6, FOS, CIPC, SLIRP, TSHR, B2M, SFXN1, GSTA1, CLN6, HEXA, IL25, MMP14, SLC39A2, RHOV, CAPN3, PYGL, TPM1, ANXA2, CYP19, TRPM7, FGF7, SLC24A5, DUOX2, BMP4, SIX6, SIX1, ESR2, 7SK, U1, 5S_rRNA, SNORA66, U4, SNORD22, U6, Y_RNA, U7, SNORD16, Metazoa_SRP, SNORD18, SNORA62, U5, U2, SNORA70, RNaseP_nuc, SNORA72
7:92815672:92815672	7	92815672	92815672	0	1087		, ARF6, FOS, CIPC, SLIRP, TSHR, B2M, SFXN1, GSTA1, CLN6, HEXA, IL25, MMP14, SLC39A2, RHOV, CAPN3, PYGL, TPM1, ANXA2, CYP19, TRPM7, FGF7, SLC24A5, DUOX2, BMP4, SIX6, SIX1, ESR2, 7SK, U1, 5S_rRNA, SNORA66, U4, SNORD22, U6, Y_RNA, U7, SNORD16, Metazoa_SRP, SNORD18, SNORA62, U5, U2, SNORA70, RNaseP_nuc, SNORA72
7:93100321:102821712	7	93100321	102821712	9.72139	1087		, ARF6, FOS, CIPC, SLIRP, TSHR, B2M, SFXN1, GSTA1, CLN6, HEXA, IL25, MMP14, SLC39A2, RHOV, CAPN3, PYGL, TPM1, ANXA2, CYP19, TRPM7, FGF7, SLC24A5, DUOX2, BMP4, SIX6, SIX1, ESR2, 7SK, U1, 5S_rRNA, SNORA66, U4, SNORD22, U6, Y_RNA, U7, SNORD16, Metazoa_SRP, SNORD18, SNORA62, U5, U2, SNORA70, RNaseP_nuc, SNORA72
8:32622:92252442	8	32622	92252442	92.2198	595		, LATS1, VIP, SLC17A5, ME1, ASF1A, FOXO3, ATG5, COQ3, AKIRIN2, CGA, CCN2, U6, SNORA70, 5S_rRNA, U2, 7SK, U5, SNORD22, U12
8:92383226:95866565	8	92383226	95866565	3.48334	595		, LATS1, VIP, SLC17A5, ME1, ASF1A, FOXO3, ATG5, COQ3, AKIRIN2, CGA, CCN2, U6, SNORA70, 5S_rRNA, U2, 7SK, U5, SNORD22, U12
8:95919216:97906876	8	95919216	97906876	1.98766	595		, LATS1, VIP, SLC17A5, ME1, ASF1A, FOXO3, ATG5, COQ3, AKIRIN2, CGA, CCN2, U6, SNORA70, 5S_rRNA, U2, 7SK, U5, SNORD22, U12
9:10245509:13477344	9	10245509	13477344	3.23183	489		, IL7, MYC, SQLE, FABP5, FABP4, EIF3H, SNAI2, DGAT1, TRHR, LYN, SDR16C5, TTPA, MCMDC2, oar-mir-30a, U6, U1, 5S_rRNA, oar-mir-30d, oar-mir-30b, U2, Y_RNA, Metazoa_SRP, SNORD22, 7SK, Vault, SNORA70
9:1070014:9596190	9	1070014	9596190	8.52618	489		, IL7, MYC, SQLE, FABP5, FABP4, EIF3H, SNAI2, DGAT1, TRHR, LYN, SDR16C5, TTPA, MCMDC2, oar-mir-30a, U6, U1, 5S_rRNA, oar-mir-30d, oar-mir-30b, U2, Y_RNA, Metazoa_SRP, SNORD22, 7SK, Vault, SNORA70
9:13575253:34219989	9	13575253	34219989	20.6447	489		, IL7, MYC, SQLE, FABP5, FABP4, EIF3H, SNAI2, DGAT1, TRHR, LYN, SDR16C5, TTPA, MCMDC2, oar-mir-30a, U6, U1, 5S_rRNA, oar-mir-30d, oar-mir-30b, U2, Y_RNA, Metazoa_SRP, SNORD22, 7SK, Vault, SNORA70
9:34347209:35522649	9	34347209	35522649	1.17544	489		, IL7, MYC, SQLE, FABP5, FABP4, EIF3H, SNAI2, DGAT1, TRHR, LYN, SDR16C5, TTPA, MCMDC2, oar-mir-30a, U6, U1, 5S_rRNA, oar-mir-30d, oar-mir-30b, U2, Y_RNA, Metazoa_SRP, SNORD22, 7SK, Vault, SNORA70
9:35607406:75004528	9	35607406	75004528	39.3971	489		, IL7, MYC, SQLE, FABP5, FABP4, EIF3H, SNAI2, DGAT1, TRHR, LYN, SDR16C5, TTPA, MCMDC2, oar-mir-30a, U6, U1, 5S_rRNA, oar-mir-30d, oar-mir-30b, U2, Y_RNA, Metazoa_SRP, SNORD22, 7SK, Vault, SNORA70
