# Supplementary material for: Comparative Detection of Selection Signatures in Indigenous and Crossbred Turkish Sheep Breeds
Source: Research Square preprint supplement (doi:10.21203/rs.3.rs-7364156/v1), 2025-09-09
Supplement: Supplementary file 5 [file a4a67d825d5c3a4dd9fa81ce.xlsx]

## Sheet: Sheet1
	Table S6. Signatures of selection detected by iHS in Akkaraman
Region	Chr	Start	Stop	Size_Mb	No_of_genes	Genes
10:4.6e+08:46500000	10	460000000	46500000	-413.5	233	, U6, FBXL3, 7SK, oar-mir-17, oar-mir-19b, 5S_rRNA, DCT, U2, SLC15A1
10:4.8e+08:4.9e+08	10	480000000	490000000	10	233	, U6, FBXL3, 7SK, oar-mir-17, oar-mir-19b, 5S_rRNA, DCT, U2, SLC15A1
10:40500000:4.1e+08	10	40500000	410000000	369.5	233	, U6, FBXL3, 7SK, oar-mir-17, oar-mir-19b, 5S_rRNA, DCT, U2, SLC15A1
10:6500000:7e+06	10	6500000	7000000	0.5	233	, U6, FBXL3, 7SK, oar-mir-17, oar-mir-19b, 5S_rRNA, DCT, U2, SLC15A1
11:14500000:1.5e+08	11	14500000	150000000	135.5	1203	, U1, SNORA70, U6, U4, 5S_rRNA, RPL23A, SNORD42, SNORA72, SLC6A4, SERPINF1, RPA1, Y_RNA, SNORA62, TXNDC17, SLC25A11, MED11, CLDN7, EIF5A, TP53, U8, PMP22, 7SK, UBB, SHMT1, B4GALNT2, ATP5MC1, oar-mir-10a, oar-mir-152, ARL5C, THRA, NR1D1, IGFBP4, KRT25, KRT27, BIIIB4, KRTAP1-3, K33, V15, KRT35, ACLY, STAT5A, CCR10, U2, CRHR1, STRADA, GH, SLC25A10, Metazoa_SRP, TIMP2, CYGB, AANAT, SLC25A19, ATP5PD, …
15:13500000:1.4e+08	15	13500000	140000000	126.5	923	, U6, 5S_rRNA, CRYAB, IL18, BCO2, CD3E, CD3D, SNORA70, RPS25, oar-mir-125b, SNORD14, MYOD1, CALCB, BMAL1, U5, ILK, ARFIP2, SMPD1, U4, U1, UCP2, SNORD15, 7SK, FSHB, EIF3M, APIP, CRY2, F2, SLC39A13
15:2.3e+08:23500000	15	230000000	23500000	-206.5	923	, U6, 5S_rRNA, CRYAB, IL18, BCO2, CD3E, CD3D, SNORA70, RPS25, oar-mir-125b, SNORD14, MYOD1, CALCB, BMAL1, U5, ILK, ARFIP2, SMPD1, U4, U1, UCP2, SNORD15, 7SK, FSHB, EIF3M, APIP, CRY2, F2, SLC39A13
16:2.8e+08:28500000	16	280000000	28500000	-251.5	1	NA
17:1.2e+08:12500000	17	120000000	12500000	-107.5	622	, U6, SNORD73, EDNRA, 7SK, IL15, U1, FGF2, U4, IL21, IL2, SNORA72, 5S_rRNA, TDO2, PUS1, SNORA70, U2, RHOF, RNF34, MYL2, RAB21, ERP29, Metazoa_SRP, CRYBB3, SLC5A1, SNRPD3
17:10500000:11500000	17	10500000	11500000	1	622	, U6, SNORD73, EDNRA, 7SK, IL15, U1, FGF2, U4, IL21, IL2, SNORA72, 5S_rRNA, TDO2, PUS1, SNORA70, U2, RHOF, RNF34, MYL2, RAB21, ERP29, Metazoa_SRP, CRYBB3, SLC5A1, SNRPD3
17:13500000:14500000	17	13500000	14500000	1	622	, U6, SNORD73, EDNRA, 7SK, IL15, U1, FGF2, U4, IL21, IL2, SNORA72, 5S_rRNA, TDO2, PUS1, SNORA70, U2, RHOF, RNF34, MYL2, RAB21, ERP29, Metazoa_SRP, CRYBB3, SLC5A1, SNRPD3
17:15500000:18500000	17	15500000	18500000	3	622	, U6, SNORD73, EDNRA, 7SK, IL15, U1, FGF2, U4, IL21, IL2, SNORA72, 5S_rRNA, TDO2, PUS1, SNORA70, U2, RHOF, RNF34, MYL2, RAB21, ERP29, Metazoa_SRP, CRYBB3, SLC5A1, SNRPD3
17:19500000:2e+07	17	19500000	20000000	0.5	622	, U6, SNORD73, EDNRA, 7SK, IL15, U1, FGF2, U4, IL21, IL2, SNORA72, 5S_rRNA, TDO2, PUS1, SNORA70, U2, RHOF, RNF34, MYL2, RAB21, ERP29, Metazoa_SRP, CRYBB3, SLC5A1, SNRPD3
17:2.2e+08:22500000	17	220000000	22500000	-197.5	622	, U6, SNORD73, EDNRA, 7SK, IL15, U1, FGF2, U4, IL21, IL2, SNORA72, 5S_rRNA, TDO2, PUS1, SNORA70, U2, RHOF, RNF34, MYL2, RAB21, ERP29, Metazoa_SRP, CRYBB3, SLC5A1, SNRPD3
17:2.5e+08:25500000	17	250000000	25500000	-224.5	622	, U6, SNORD73, EDNRA, 7SK, IL15, U1, FGF2, U4, IL21, IL2, SNORA72, 5S_rRNA, TDO2, PUS1, SNORA70, U2, RHOF, RNF34, MYL2, RAB21, ERP29, Metazoa_SRP, CRYBB3, SLC5A1, SNRPD3
17:2.8e+08:28500000	17	280000000	28500000	-251.5	622	, U6, SNORD73, EDNRA, 7SK, IL15, U1, FGF2, U4, IL21, IL2, SNORA72, 5S_rRNA, TDO2, PUS1, SNORA70, U2, RHOF, RNF34, MYL2, RAB21, ERP29, Metazoa_SRP, CRYBB3, SLC5A1, SNRPD3
17:2.9e+08:3e+07	17	290000000	30000000	-260	622	, U6, SNORD73, EDNRA, 7SK, IL15, U1, FGF2, U4, IL21, IL2, SNORA72, 5S_rRNA, TDO2, PUS1, SNORA70, U2, RHOF, RNF34, MYL2, RAB21, ERP29, Metazoa_SRP, CRYBB3, SLC5A1, SNRPD3
17:23500000:24500000	17	23500000	24500000	1	622	, U6, SNORD73, EDNRA, 7SK, IL15, U1, FGF2, U4, IL21, IL2, SNORA72, 5S_rRNA, TDO2, PUS1, SNORA70, U2, RHOF, RNF34, MYL2, RAB21, ERP29, Metazoa_SRP, CRYBB3, SLC5A1, SNRPD3
17:3.5e+08:35500000	17	350000000	35500000	-314.5	622	, U6, SNORD73, EDNRA, 7SK, IL15, U1, FGF2, U4, IL21, IL2, SNORA72, 5S_rRNA, TDO2, PUS1, SNORA70, U2, RHOF, RNF34, MYL2, RAB21, ERP29, Metazoa_SRP, CRYBB3, SLC5A1, SNRPD3
17:33500000:3.4e+08	17	33500000	340000000	306.5	622	, U6, SNORD73, EDNRA, 7SK, IL15, U1, FGF2, U4, IL21, IL2, SNORA72, 5S_rRNA, TDO2, PUS1, SNORA70, U2, RHOF, RNF34, MYL2, RAB21, ERP29, Metazoa_SRP, CRYBB3, SLC5A1, SNRPD3
17:36500000:3.7e+08	17	36500000	370000000	333.5	622	, U6, SNORD73, EDNRA, 7SK, IL15, U1, FGF2, U4, IL21, IL2, SNORA72, 5S_rRNA, TDO2, PUS1, SNORA70, U2, RHOF, RNF34, MYL2, RAB21, ERP29, Metazoa_SRP, CRYBB3, SLC5A1, SNRPD3
17:38500000:3.9e+08	17	38500000	390000000	351.5	622	, U6, SNORD73, EDNRA, 7SK, IL15, U1, FGF2, U4, IL21, IL2, SNORA72, 5S_rRNA, TDO2, PUS1, SNORA70, U2, RHOF, RNF34, MYL2, RAB21, ERP29, Metazoa_SRP, CRYBB3, SLC5A1, SNRPD3
17:39500000:4e+07	17	39500000	40000000	0.5	622	, U6, SNORD73, EDNRA, 7SK, IL15, U1, FGF2, U4, IL21, IL2, SNORA72, 5S_rRNA, TDO2, PUS1, SNORA70, U2, RHOF, RNF34, MYL2, RAB21, ERP29, Metazoa_SRP, CRYBB3, SLC5A1, SNRPD3
17:4.2e+08:4.3e+08	17	420000000	430000000	10	622	, U6, SNORD73, EDNRA, 7SK, IL15, U1, FGF2, U4, IL21, IL2, SNORA72, 5S_rRNA, TDO2, PUS1, SNORA70, U2, RHOF, RNF34, MYL2, RAB21, ERP29, Metazoa_SRP, CRYBB3, SLC5A1, SNRPD3
17:43500000:44500000	17	43500000	44500000	1	622	, U6, SNORD73, EDNRA, 7SK, IL15, U1, FGF2, U4, IL21, IL2, SNORA72, 5S_rRNA, TDO2, PUS1, SNORA70, U2, RHOF, RNF34, MYL2, RAB21, ERP29, Metazoa_SRP, CRYBB3, SLC5A1, SNRPD3
17:48500000:4.9e+08	17	48500000	490000000	441.5	622	, U6, SNORD73, EDNRA, 7SK, IL15, U1, FGF2, U4, IL21, IL2, SNORA72, 5S_rRNA, TDO2, PUS1, SNORA70, U2, RHOF, RNF34, MYL2, RAB21, ERP29, Metazoa_SRP, CRYBB3, SLC5A1, SNRPD3
17:6e+06:1e+07	17	6000000	10000000	4	622	, U6, SNORD73, EDNRA, 7SK, IL15, U1, FGF2, U4, IL21, IL2, SNORA72, 5S_rRNA, TDO2, PUS1, SNORA70, U2, RHOF, RNF34, MYL2, RAB21, ERP29, Metazoa_SRP, CRYBB3, SLC5A1, SNRPD3
18:1500000:2e+06	18	1500000	2000000	0.5	677	U6, , 5S_rRNA, RHCG, PLIN1, CIB1, FURIN, ARNT2, U4, SNRPA1, CYP1A1, SNORA70, CYP11A1, MCP-3, Vault, U1, U3, SRP54, PSMA6, NFKBIA, PDIA3, SERPINA1, SERPINA14, oar-mir-493, oar-mir-665, oar-mir-431, oar-mir-127, oar-mir-432, oar-mir-136, oar-mir-370, oar-mir-379, oar-mir-411a, oar-mir-380, oar-mir-411b, oar-mir-1197, oar-mir-323a, oar-mir-758, oar-mir-329b, oar-mir-329a, oar-mir-494, oar-mir-1193, …
18:17500000:1.8e+08	18	17500000	180000000	162.5	677	U6, , 5S_rRNA, RHCG, PLIN1, CIB1, FURIN, ARNT2, U4, SNRPA1, CYP1A1, SNORA70, CYP11A1, MCP-3, Vault, U1, U3, SRP54, PSMA6, NFKBIA, PDIA3, SERPINA1, SERPINA14, oar-mir-493, oar-mir-665, oar-mir-431, oar-mir-127, oar-mir-432, oar-mir-136, oar-mir-370, oar-mir-379, oar-mir-411a, oar-mir-380, oar-mir-411b, oar-mir-1197, oar-mir-323a, oar-mir-758, oar-mir-329b, oar-mir-329a, oar-mir-494, oar-mir-1193, …
18:19500000:2e+07	18	19500000	20000000	0.5	677	U6, , 5S_rRNA, RHCG, PLIN1, CIB1, FURIN, ARNT2, U4, SNRPA1, CYP1A1, SNORA70, CYP11A1, MCP-3, Vault, U1, U3, SRP54, PSMA6, NFKBIA, PDIA3, SERPINA1, SERPINA14, oar-mir-493, oar-mir-665, oar-mir-431, oar-mir-127, oar-mir-432, oar-mir-136, oar-mir-370, oar-mir-379, oar-mir-411a, oar-mir-380, oar-mir-411b, oar-mir-1197, oar-mir-323a, oar-mir-758, oar-mir-329b, oar-mir-329a, oar-mir-494, oar-mir-1193, …
19:15500000:1.6e+08	19	15500000	160000000	144.5	524	, SNORD36, ABHD5, U6, OXTR, ARL8B, BHLHE40, 5S_rRNA, SNORD22, SLC25A26, U3, ARF4, U5, SNORD63, oar-let-7g, TLR9, U4, HYAL2, GNAI2, RHOA, IMPDH, oar-mir-191, SLC25A20, CATHL3, BAC5, SC5, ELP6, LTF, CCR3, CCR9, U2, 7SK, PPARG, 5_8S_rRNA, RAB7A
19:19500000:2e+07	19	19500000	20000000	0.5	524	, SNORD36, ABHD5, U6, OXTR, ARL8B, BHLHE40, 5S_rRNA, SNORD22, SLC25A26, U3, ARF4, U5, SNORD63, oar-let-7g, TLR9, U4, HYAL2, GNAI2, RHOA, IMPDH, oar-mir-191, SLC25A20, CATHL3, BAC5, SC5, ELP6, LTF, CCR3, CCR9, U2, 7SK, PPARG, 5_8S_rRNA, RAB7A
19:57500000:5.8e+08	19	57500000	580000000	522.5	524	, SNORD36, ABHD5, U6, OXTR, ARL8B, BHLHE40, 5S_rRNA, SNORD22, SLC25A26, U3, ARF4, U5, SNORD63, oar-let-7g, TLR9, U4, HYAL2, GNAI2, RHOA, IMPDH, oar-mir-191, SLC25A20, CATHL3, BAC5, SC5, ELP6, LTF, CCR3, CCR9, U2, 7SK, PPARG, 5_8S_rRNA, RAB7A
19:8500000:9e+06	19	8500000	9000000	0.5	524	, SNORD36, ABHD5, U6, OXTR, ARL8B, BHLHE40, 5S_rRNA, SNORD22, SLC25A26, U3, ARF4, U5, SNORD63, oar-let-7g, TLR9, U4, HYAL2, GNAI2, RHOA, IMPDH, oar-mir-191, SLC25A20, CATHL3, BAC5, SC5, ELP6, LTF, CCR3, CCR9, U2, 7SK, PPARG, 5_8S_rRNA, RAB7A
20:2.6e+08:26500000	20	260000000	26500000	-233.5	1	NA
22:2.2e+08:22500000	22	220000000	22500000	-197.5	1	NA
23:3.3e+08:33500000	23	330000000	33500000	-296.5	1	NA
25:3.6e+08:36500000	25	360000000	36500000	-323.5	1	NA
26:4.9e+08:49500000	26	490000000	49500000	-440.5	1	NA
2:1.13e+10:113500000	2	11300000000	113500000	-11186.5	1086	, GLRX, U6, MSTN, OSGEPL1, GULP1, U1, 7SK, 5S_rRNA, ITGAV, U4, U8, oar-mir-10b, GCG, ITGB6, U12, U2, ARL5A, ACVR2A, KYNU, CXCR4, DARS1, STAT1, SNORA70, PPIL3, NIF3L1, BMPR2, CD28, CTLA4, snoZ196, IDH1, IGFBP5, SLC11A1, oar-mir-26b, PRKAG3, TUBA4A, SNORD39, INHA, ITM2C, SNORA75, SNORD82, COPS7B, SNORA62, LCK, FABP3, SNORA73, EYA3, SFN, LIN28A, CD52, ID3, C1QA, U3
2:1.19e+10:119500000	2	11900000000	119500000	-11780.5	1086	, GLRX, U6, MSTN, OSGEPL1, GULP1, U1, 7SK, 5S_rRNA, ITGAV, U4, U8, oar-mir-10b, GCG, ITGB6, U12, U2, ARL5A, ACVR2A, KYNU, CXCR4, DARS1, STAT1, SNORA70, PPIL3, NIF3L1, BMPR2, CD28, CTLA4, snoZ196, IDH1, IGFBP5, SLC11A1, oar-mir-26b, PRKAG3, TUBA4A, SNORD39, INHA, ITM2C, SNORA75, SNORD82, COPS7B, SNORA62, LCK, FABP3, SNORA73, EYA3, SFN, LIN28A, CD52, ID3, C1QA, U3
2:115500000:1.16e+10	2	115500000	11600000000	11484.5	1086	, GLRX, U6, MSTN, OSGEPL1, GULP1, U1, 7SK, 5S_rRNA, ITGAV, U4, U8, oar-mir-10b, GCG, ITGB6, U12, U2, ARL5A, ACVR2A, KYNU, CXCR4, DARS1, STAT1, SNORA70, PPIL3, NIF3L1, BMPR2, CD28, CTLA4, snoZ196, IDH1, IGFBP5, SLC11A1, oar-mir-26b, PRKAG3, TUBA4A, SNORD39, INHA, ITM2C, SNORA75, SNORD82, COPS7B, SNORA62, LCK, FABP3, SNORA73, EYA3, SFN, LIN28A, CD52, ID3, C1QA, U3
2:117500000:118500000	2	117500000	118500000	1	1086	, GLRX, U6, MSTN, OSGEPL1, GULP1, U1, 7SK, 5S_rRNA, ITGAV, U4, U8, oar-mir-10b, GCG, ITGB6, U12, U2, ARL5A, ACVR2A, KYNU, CXCR4, DARS1, STAT1, SNORA70, PPIL3, NIF3L1, BMPR2, CD28, CTLA4, snoZ196, IDH1, IGFBP5, SLC11A1, oar-mir-26b, PRKAG3, TUBA4A, SNORD39, INHA, ITM2C, SNORA75, SNORD82, COPS7B, SNORA62, LCK, FABP3, SNORA73, EYA3, SFN, LIN28A, CD52, ID3, C1QA, U3
2:8.2e+08:82500000	2	820000000	82500000	-737.5	1086	, GLRX, U6, MSTN, OSGEPL1, GULP1, U1, 7SK, 5S_rRNA, ITGAV, U4, U8, oar-mir-10b, GCG, ITGB6, U12, U2, ARL5A, ACVR2A, KYNU, CXCR4, DARS1, STAT1, SNORA70, PPIL3, NIF3L1, BMPR2, CD28, CTLA4, snoZ196, IDH1, IGFBP5, SLC11A1, oar-mir-26b, PRKAG3, TUBA4A, SNORD39, INHA, ITM2C, SNORA75, SNORD82, COPS7B, SNORA62, LCK, FABP3, SNORA73, EYA3, SFN, LIN28A, CD52, ID3, C1QA, U3
2:8.3e+08:83500000	2	830000000	83500000	-746.5	1086	, GLRX, U6, MSTN, OSGEPL1, GULP1, U1, 7SK, 5S_rRNA, ITGAV, U4, U8, oar-mir-10b, GCG, ITGB6, U12, U2, ARL5A, ACVR2A, KYNU, CXCR4, DARS1, STAT1, SNORA70, PPIL3, NIF3L1, BMPR2, CD28, CTLA4, snoZ196, IDH1, IGFBP5, SLC11A1, oar-mir-26b, PRKAG3, TUBA4A, SNORD39, INHA, ITM2C, SNORA75, SNORD82, COPS7B, SNORA62, LCK, FABP3, SNORA73, EYA3, SFN, LIN28A, CD52, ID3, C1QA, U3
4:3.2e+08:32500000	4	320000000	32500000	-287.5	1	NA
8:2e+07:20500000	8	20000000	20500000	0.5	7
