# Supplementary material for: Comparative Detection of Selection Signatures in Indigenous and Crossbred Turkish Sheep Breeds
Source: Research Square preprint supplement (doi:10.21203/rs.3.rs-7364156/v1), 2025-09-09
Supplement: Supplementary file 6 [file c565b74ca99a705727426232.xlsx]

## Sheet: Sheet1
	Table S7. Signatures of selection detected by iHS in Hasak
Region	Chr	Start	Stop	Size_Mb	No_of_genes	Genes
10:6e+07:60500000	10	60000000	60500000	0.5	2	, U6
15:5.4e+08:54500000	15	540000000	54500000	-485.5	213	, U6, CRY2, F2, SLC39A13
15:5.5e+08:55500000	15	550000000	55500000	-494.5	213	, U6, CRY2, F2, SLC39A13
15:5.9e+08:59500000	15	590000000	59500000	-530.5	213	, U6, CRY2, F2, SLC39A13
15:6.9e+08:69500000	15	690000000	69500000	-620.5	213	, U6, CRY2, F2, SLC39A13
15:70500000:7.1e+08	15	70500000	710000000	639.5	213	, U6, CRY2, F2, SLC39A13
17:1.4e+08:14500000	17	140000000	14500000	-125.5	587	, U6, 7SK, U2, FGF2, U4, IL21, IL2, SNORA72, 5S_rRNA, TDO2, PUS1, SNORA70, RHOF, RNF34, MYL2, RAB21, ERP29, Metazoa_SRP, CRYBB3, SLC5A1, SNRPD3
17:25500000:2.6e+08	17	25500000	260000000	234.5	587	, U6, 7SK, U2, FGF2, U4, IL21, IL2, SNORA72, 5S_rRNA, TDO2, PUS1, SNORA70, RHOF, RNF34, MYL2, RAB21, ERP29, Metazoa_SRP, CRYBB3, SLC5A1, SNRPD3
17:26500000:2.7e+08	17	26500000	270000000	243.5	587	, U6, 7SK, U2, FGF2, U4, IL21, IL2, SNORA72, 5S_rRNA, TDO2, PUS1, SNORA70, RHOF, RNF34, MYL2, RAB21, ERP29, Metazoa_SRP, CRYBB3, SLC5A1, SNRPD3
17:28500000:3e+07	17	28500000	30000000	1.5	587	, U6, 7SK, U2, FGF2, U4, IL21, IL2, SNORA72, 5S_rRNA, TDO2, PUS1, SNORA70, RHOF, RNF34, MYL2, RAB21, ERP29, Metazoa_SRP, CRYBB3, SLC5A1, SNRPD3
17:3.2e+08:3.4e+08	17	320000000	340000000	20	587	, U6, 7SK, U2, FGF2, U4, IL21, IL2, SNORA72, 5S_rRNA, TDO2, PUS1, SNORA70, RHOF, RNF34, MYL2, RAB21, ERP29, Metazoa_SRP, CRYBB3, SLC5A1, SNRPD3
17:3.6e+08:36500000	17	360000000	36500000	-323.5	587	, U6, 7SK, U2, FGF2, U4, IL21, IL2, SNORA72, 5S_rRNA, TDO2, PUS1, SNORA70, RHOF, RNF34, MYL2, RAB21, ERP29, Metazoa_SRP, CRYBB3, SLC5A1, SNRPD3
17:3.7e+08:37500000	17	370000000	37500000	-332.5	587	, U6, 7SK, U2, FGF2, U4, IL21, IL2, SNORA72, 5S_rRNA, TDO2, PUS1, SNORA70, RHOF, RNF34, MYL2, RAB21, ERP29, Metazoa_SRP, CRYBB3, SLC5A1, SNRPD3
17:4e+07:40500000	17	40000000	40500000	0.5	587	, U6, 7SK, U2, FGF2, U4, IL21, IL2, SNORA72, 5S_rRNA, TDO2, PUS1, SNORA70, RHOF, RNF34, MYL2, RAB21, ERP29, Metazoa_SRP, CRYBB3, SLC5A1, SNRPD3
23:3e+07:30500000	23	30000000	30500000	0.5	3	, AQP4
4:92500000:9.3e+08	4	92500000	930000000	837.5	361	, U6, CHCHD3, 5S_rRNA, 7SK, Y_RNA, CDK5, RHEB, Vault
6:28500000:2.9e+08	6	28500000	290000000	261.5	620	, BMPR1B, U6, ABCG2, SPP1, 5S_rRNA, SNORA70, TLR10, TLR1, TLR6, LIAS, RHOH, KDR, CLOCK, U4, IGFBP7, GNRHR, UGT2B7, CSN1S1, CSN2, CSN1S2, CSN3, SNORD42, ALB, 7SK, CXCL8, CXCL1, RCHY1, U1, CXCL10, SCD5, NUDT9, RAB28, BLOC1S4, HTT
6:34500000:3.5e+08	6	34500000	350000000	315.5	620	, BMPR1B, U6, ABCG2, SPP1, 5S_rRNA, SNORA70, TLR10, TLR1, TLR6, LIAS, RHOH, KDR, CLOCK, U4, IGFBP7, GNRHR, UGT2B7, CSN1S1, CSN2, CSN1S2, CSN3, SNORD42, ALB, 7SK, CXCL8, CXCL1, RCHY1, U1, CXCL10, SCD5, NUDT9, RAB28, BLOC1S4, HTT
6:35500000:3.6e+08	6	35500000	360000000	324.5	620	, BMPR1B, U6, ABCG2, SPP1, 5S_rRNA, SNORA70, TLR10, TLR1, TLR6, LIAS, RHOH, KDR, CLOCK, U4, IGFBP7, GNRHR, UGT2B7, CSN1S1, CSN2, CSN1S2, CSN3, SNORD42, ALB, 7SK, CXCL8, CXCL1, RCHY1, U1, CXCL10, SCD5, NUDT9, RAB28, BLOC1S4, HTT
6:36500000:3.7e+08	6	36500000	370000000	333.5	620	, BMPR1B, U6, ABCG2, SPP1, 5S_rRNA, SNORA70, TLR10, TLR1, TLR6, LIAS, RHOH, KDR, CLOCK, U4, IGFBP7, GNRHR, UGT2B7, CSN1S1, CSN2, CSN1S2, CSN3, SNORD42, ALB, 7SK, CXCL8, CXCL1, RCHY1, U1, CXCL10, SCD5, NUDT9, RAB28, BLOC1S4, HTT
6:37500000:38500000	6	37500000	38500000	1	620	, BMPR1B, U6, ABCG2, SPP1, 5S_rRNA, SNORA70, TLR10, TLR1, TLR6, LIAS, RHOH, KDR, CLOCK, U4, IGFBP7, GNRHR, UGT2B7, CSN1S1, CSN2, CSN1S2, CSN3, SNORD42, ALB, 7SK, CXCL8, CXCL1, RCHY1, U1, CXCL10, SCD5, NUDT9, RAB28, BLOC1S4, HTT
7:37500000:3.8e+08	7	37500000	380000000	342.5	542	Metazoa_SRP, , U6, ARF6, U1, PYGL, TPM1, ANXA2, U7, 5S_rRNA, CYP19, TRPM7, FGF7, SLC24A5, DUOX2, BMP4, SNORA72, 7SK, SIX6, SIX1, ESR2, U2, FOS, CIPC, SLIRP, TSHR, Y_RNA, U4, GSTA1, B2M
9:7.1e+08:71500000	9	710000000	71500000	-638.5	1	NA
