# Supplementary material for: Comparative Detection of Selection Signatures in Indigenous and Crossbred Turkish Sheep Breeds
Source: Research Square preprint supplement (doi:10.21203/rs.3.rs-7364156/v1), 2025-09-09
Supplement: Supplementary file 7 [file d32402d2f7045ecb0d7e3031.xlsx]

## Sheet: Sheet1
	Table S10. Signatures of selection detected by iHS in Oamer
Region	Chr	Start	Stop	Size_Mb	No_of_genes	Peak_gene	Genes
13:4.6e+08:46500000	13	460000000	46500000	-413.5	1		NA
1:1.67e+10:167500000	1	16700000000	167500000	-16532.5	2203		, U6, 5S_rRNA, Vault, SNORA62, PRKAA2, CYP2J, 7SK, U1, LEPR, SNORA70, IL12RB2, DIRAS3, RABGGTB, SNORD21, SNORA66, U5, SLC30A7, RNaseP_nuc, CYM, CD53, OVGP1, ADORA3, Y_RNA, ATP1A1, HSD3B1, GJA8, FCGR1A, ARNT, PSMD4, PRD-SPRRII, SLC39A1, RIT1, BGLAP, CD1D, CD1, FCER1A, SLAMF9, SLAMF1, ITLN, FCGR3A, FCGR2B, RGS4, RXRG, CD247, RCAN1, ATP5PO, IFNAR1, IFNAR2, SOD1, KAP7, BTG3, oar-mir-99a, U2, U4, POU1…
1:1.79e+10:179500000	1	17900000000	179500000	-17720.5	2203		, U6, 5S_rRNA, Vault, SNORA62, PRKAA2, CYP2J, 7SK, U1, LEPR, SNORA70, IL12RB2, DIRAS3, RABGGTB, SNORD21, SNORA66, U5, SLC30A7, RNaseP_nuc, CYM, CD53, OVGP1, ADORA3, Y_RNA, ATP1A1, HSD3B1, GJA8, FCGR1A, ARNT, PSMD4, PRD-SPRRII, SLC39A1, RIT1, BGLAP, CD1D, CD1, FCER1A, SLAMF9, SLAMF1, ITLN, FCGR3A, FCGR2B, RGS4, RXRG, CD247, RCAN1, ATP5PO, IFNAR1, IFNAR2, SOD1, KAP7, BTG3, oar-mir-99a, U2, U4, POU1…
1:106500000:1.07e+10	1	106500000	10700000000	10593.5	2203		, U6, 5S_rRNA, Vault, SNORA62, PRKAA2, CYP2J, 7SK, U1, LEPR, SNORA70, IL12RB2, DIRAS3, RABGGTB, SNORD21, SNORA66, U5, SLC30A7, RNaseP_nuc, CYM, CD53, OVGP1, ADORA3, Y_RNA, ATP1A1, HSD3B1, GJA8, FCGR1A, ARNT, PSMD4, PRD-SPRRII, SLC39A1, RIT1, BGLAP, CD1D, CD1, FCER1A, SLAMF9, SLAMF1, ITLN, FCGR3A, FCGR2B, RGS4, RXRG, CD247, RCAN1, ATP5PO, IFNAR1, IFNAR2, SOD1, KAP7, BTG3, oar-mir-99a, U2, U4, POU1…
1:116500000:117500000	1	116500000	117500000	1	2203		, U6, 5S_rRNA, Vault, SNORA62, PRKAA2, CYP2J, 7SK, U1, LEPR, SNORA70, IL12RB2, DIRAS3, RABGGTB, SNORD21, SNORA66, U5, SLC30A7, RNaseP_nuc, CYM, CD53, OVGP1, ADORA3, Y_RNA, ATP1A1, HSD3B1, GJA8, FCGR1A, ARNT, PSMD4, PRD-SPRRII, SLC39A1, RIT1, BGLAP, CD1D, CD1, FCER1A, SLAMF9, SLAMF1, ITLN, FCGR3A, FCGR2B, RGS4, RXRG, CD247, RCAN1, ATP5PO, IFNAR1, IFNAR2, SOD1, KAP7, BTG3, oar-mir-99a, U2, U4, POU1…
1:205500000:2.06e+10	1	205500000	20600000000	20394.5	2203		, U6, 5S_rRNA, Vault, SNORA62, PRKAA2, CYP2J, 7SK, U1, LEPR, SNORA70, IL12RB2, DIRAS3, RABGGTB, SNORD21, SNORA66, U5, SLC30A7, RNaseP_nuc, CYM, CD53, OVGP1, ADORA3, Y_RNA, ATP1A1, HSD3B1, GJA8, FCGR1A, ARNT, PSMD4, PRD-SPRRII, SLC39A1, RIT1, BGLAP, CD1D, CD1, FCER1A, SLAMF9, SLAMF1, ITLN, FCGR3A, FCGR2B, RGS4, RXRG, CD247, RCAN1, ATP5PO, IFNAR1, IFNAR2, SOD1, KAP7, BTG3, oar-mir-99a, U2, U4, POU1…
1:21500000:2.2e+08	1	21500000	220000000	198.5	2203		, U6, 5S_rRNA, Vault, SNORA62, PRKAA2, CYP2J, 7SK, U1, LEPR, SNORA70, IL12RB2, DIRAS3, RABGGTB, SNORD21, SNORA66, U5, SLC30A7, RNaseP_nuc, CYM, CD53, OVGP1, ADORA3, Y_RNA, ATP1A1, HSD3B1, GJA8, FCGR1A, ARNT, PSMD4, PRD-SPRRII, SLC39A1, RIT1, BGLAP, CD1D, CD1, FCER1A, SLAMF9, SLAMF1, ITLN, FCGR3A, FCGR2B, RGS4, RXRG, CD247, RCAN1, ATP5PO, IFNAR1, IFNAR2, SOD1, KAP7, BTG3, oar-mir-99a, U2, U4, POU1…
1:290500000:2.91e+10	1	290500000	29100000000	28809.5	2203		, U6, 5S_rRNA, Vault, SNORA62, PRKAA2, CYP2J, 7SK, U1, LEPR, SNORA70, IL12RB2, DIRAS3, RABGGTB, SNORD21, SNORA66, U5, SLC30A7, RNaseP_nuc, CYM, CD53, OVGP1, ADORA3, Y_RNA, ATP1A1, HSD3B1, GJA8, FCGR1A, ARNT, PSMD4, PRD-SPRRII, SLC39A1, RIT1, BGLAP, CD1D, CD1, FCER1A, SLAMF9, SLAMF1, ITLN, FCGR3A, FCGR2B, RGS4, RXRG, CD247, RCAN1, ATP5PO, IFNAR1, IFNAR2, SOD1, KAP7, BTG3, oar-mir-99a, U2, U4, POU1…
1:4.3e+08:43500000	1	430000000	43500000	-386.5	2203		, U6, 5S_rRNA, Vault, SNORA62, PRKAA2, CYP2J, 7SK, U1, LEPR, SNORA70, IL12RB2, DIRAS3, RABGGTB, SNORD21, SNORA66, U5, SLC30A7, RNaseP_nuc, CYM, CD53, OVGP1, ADORA3, Y_RNA, ATP1A1, HSD3B1, GJA8, FCGR1A, ARNT, PSMD4, PRD-SPRRII, SLC39A1, RIT1, BGLAP, CD1D, CD1, FCER1A, SLAMF9, SLAMF1, ITLN, FCGR3A, FCGR2B, RGS4, RXRG, CD247, RCAN1, ATP5PO, IFNAR1, IFNAR2, SOD1, KAP7, BTG3, oar-mir-99a, U2, U4, POU1…
1:7.8e+08:78500000	1	780000000	78500000	-701.5	2203		, U6, 5S_rRNA, Vault, SNORA62, PRKAA2, CYP2J, 7SK, U1, LEPR, SNORA70, IL12RB2, DIRAS3, RABGGTB, SNORD21, SNORA66, U5, SLC30A7, RNaseP_nuc, CYM, CD53, OVGP1, ADORA3, Y_RNA, ATP1A1, HSD3B1, GJA8, FCGR1A, ARNT, PSMD4, PRD-SPRRII, SLC39A1, RIT1, BGLAP, CD1D, CD1, FCER1A, SLAMF9, SLAMF1, ITLN, FCGR3A, FCGR2B, RGS4, RXRG, CD247, RCAN1, ATP5PO, IFNAR1, IFNAR2, SOD1, KAP7, BTG3, oar-mir-99a, U2, U4, POU1…
1:8.7e+08:87500000	1	870000000	87500000	-782.5	2203		, U6, 5S_rRNA, Vault, SNORA62, PRKAA2, CYP2J, 7SK, U1, LEPR, SNORA70, IL12RB2, DIRAS3, RABGGTB, SNORD21, SNORA66, U5, SLC30A7, RNaseP_nuc, CYM, CD53, OVGP1, ADORA3, Y_RNA, ATP1A1, HSD3B1, GJA8, FCGR1A, ARNT, PSMD4, PRD-SPRRII, SLC39A1, RIT1, BGLAP, CD1D, CD1, FCER1A, SLAMF9, SLAMF1, ITLN, FCGR3A, FCGR2B, RGS4, RXRG, CD247, RCAN1, ATP5PO, IFNAR1, IFNAR2, SOD1, KAP7, BTG3, oar-mir-99a, U2, U4, POU1…
1:8.8e+08:9e+07	1	880000000	90000000	-790	2203		, U6, 5S_rRNA, Vault, SNORA62, PRKAA2, CYP2J, 7SK, U1, LEPR, SNORA70, IL12RB2, DIRAS3, RABGGTB, SNORD21, SNORA66, U5, SLC30A7, RNaseP_nuc, CYM, CD53, OVGP1, ADORA3, Y_RNA, ATP1A1, HSD3B1, GJA8, FCGR1A, ARNT, PSMD4, PRD-SPRRII, SLC39A1, RIT1, BGLAP, CD1D, CD1, FCER1A, SLAMF9, SLAMF1, ITLN, FCGR3A, FCGR2B, RGS4, RXRG, CD247, RCAN1, ATP5PO, IFNAR1, IFNAR2, SOD1, KAP7, BTG3, oar-mir-99a, U2, U4, POU1…
1:83500000:8.4e+08	1	83500000	840000000	756.5	2203		, U6, 5S_rRNA, Vault, SNORA62, PRKAA2, CYP2J, 7SK, U1, LEPR, SNORA70, IL12RB2, DIRAS3, RABGGTB, SNORD21, SNORA66, U5, SLC30A7, RNaseP_nuc, CYM, CD53, OVGP1, ADORA3, Y_RNA, ATP1A1, HSD3B1, GJA8, FCGR1A, ARNT, PSMD4, PRD-SPRRII, SLC39A1, RIT1, BGLAP, CD1D, CD1, FCER1A, SLAMF9, SLAMF1, ITLN, FCGR3A, FCGR2B, RGS4, RXRG, CD247, RCAN1, ATP5PO, IFNAR1, IFNAR2, SOD1, KAP7, BTG3, oar-mir-99a, U2, U4, POU1…
2:1.1e+09:111500000	2	1100000000	111500000	-988.5	869		, U6, ITGB6, U12, U2, U1, 5S_rRNA, ARL5A, ACVR2A, KYNU, CXCR4, DARS1, 7SK, U4, STAT1, SNORA70, PPIL3, NIF3L1, BMPR2, CD28, CTLA4, snoZ196, IDH1, IGFBP5, SLC11A1, oar-mir-26b, PRKAG3, TUBA4A, SNORD39, INHA, ITM2C, SNORA75, SNORD82, COPS7B, SNORA62, LCK, FABP3, SNORA73, EYA3, SFN, LIN28A, CD52, ID3, C1QA, U3
2:1.41e+10:141500000	2	14100000000	141500000	-13958.5	869		, U6, ITGB6, U12, U2, U1, 5S_rRNA, ARL5A, ACVR2A, KYNU, CXCR4, DARS1, 7SK, U4, STAT1, SNORA70, PPIL3, NIF3L1, BMPR2, CD28, CTLA4, snoZ196, IDH1, IGFBP5, SLC11A1, oar-mir-26b, PRKAG3, TUBA4A, SNORD39, INHA, ITM2C, SNORA75, SNORD82, COPS7B, SNORA62, LCK, FABP3, SNORA73, EYA3, SFN, LIN28A, CD52, ID3, C1QA, U3
2:1.55e+10:155500000	2	15500000000	155500000	-15344.5	869		, U6, ITGB6, U12, U2, U1, 5S_rRNA, ARL5A, ACVR2A, KYNU, CXCR4, DARS1, 7SK, U4, STAT1, SNORA70, PPIL3, NIF3L1, BMPR2, CD28, CTLA4, snoZ196, IDH1, IGFBP5, SLC11A1, oar-mir-26b, PRKAG3, TUBA4A, SNORD39, INHA, ITM2C, SNORA75, SNORD82, COPS7B, SNORA62, LCK, FABP3, SNORA73, EYA3, SFN, LIN28A, CD52, ID3, C1QA, U3
2:148500000:1.49e+10	2	148500000	14900000000	14751.5	869		, U6, ITGB6, U12, U2, U1, 5S_rRNA, ARL5A, ACVR2A, KYNU, CXCR4, DARS1, 7SK, U4, STAT1, SNORA70, PPIL3, NIF3L1, BMPR2, CD28, CTLA4, snoZ196, IDH1, IGFBP5, SLC11A1, oar-mir-26b, PRKAG3, TUBA4A, SNORD39, INHA, ITM2C, SNORA75, SNORD82, COPS7B, SNORA62, LCK, FABP3, SNORA73, EYA3, SFN, LIN28A, CD52, ID3, C1QA, U3
2:2.36e+10:236500000	2	23600000000	236500000	-23363.5	869		, U6, ITGB6, U12, U2, U1, 5S_rRNA, ARL5A, ACVR2A, KYNU, CXCR4, DARS1, 7SK, U4, STAT1, SNORA70, PPIL3, NIF3L1, BMPR2, CD28, CTLA4, snoZ196, IDH1, IGFBP5, SLC11A1, oar-mir-26b, PRKAG3, TUBA4A, SNORD39, INHA, ITM2C, SNORA75, SNORD82, COPS7B, SNORA62, LCK, FABP3, SNORA73, EYA3, SFN, LIN28A, CD52, ID3, C1QA, U3
2:7e+06:8500000	2	7000000	8500000	1.5	869		, U6, ITGB6, U12, U2, U1, 5S_rRNA, ARL5A, ACVR2A, KYNU, CXCR4, DARS1, 7SK, U4, STAT1, SNORA70, PPIL3, NIF3L1, BMPR2, CD28, CTLA4, snoZ196, IDH1, IGFBP5, SLC11A1, oar-mir-26b, PRKAG3, TUBA4A, SNORD39, INHA, ITM2C, SNORA75, SNORD82, COPS7B, SNORA62, LCK, FABP3, SNORA73, EYA3, SFN, LIN28A, CD52, ID3, C1QA, U3
2:9500000:1e+07	2	9500000	10000000	0.5	869		, U6, ITGB6, U12, U2, U1, 5S_rRNA, ARL5A, ACVR2A, KYNU, CXCR4, DARS1, 7SK, U4, STAT1, SNORA70, PPIL3, NIF3L1, BMPR2, CD28, CTLA4, snoZ196, IDH1, IGFBP5, SLC11A1, oar-mir-26b, PRKAG3, TUBA4A, SNORD39, INHA, ITM2C, SNORA75, SNORD82, COPS7B, SNORA62, LCK, FABP3, SNORA73, EYA3, SFN, LIN28A, CD52, ID3, C1QA, U3
3:1.58e+10:158500000	3	15800000000	158500000	-15641.5	1707		, 5S_rRNA, SNORD36, SNORD24, U6, QPCT, U4, U7, CNGA3, CIAO1, SNORA70, ATXN7L3B, MYF6, C3H12orf29, SNORD22, DCN, BTG1, NDUFA12, CBX5, HOXC6, ATP5MC2, TARBP2, IGFBP6, KRT2.11, AQP5, LALBA, IRAK4, SNORA62, YEATS4, LYZ, IL22, IFNG, U1, AVPR1A, oar-mir-26a, CDK4, MIP, TIMELESS, IL23A, CDK2, MMP19, SLC25A3, ARL1, CRY1, RTCB, TIMP3, MB, EIF3D, IFT27, BCAT1, 7SK, RPS3A, RNase_MRP, PDE6H, SLC2A3, oar-mir-…
3:1500000:2500000	3	1500000	2500000	1	1707		, 5S_rRNA, SNORD36, SNORD24, U6, QPCT, U4, U7, CNGA3, CIAO1, SNORA70, ATXN7L3B, MYF6, C3H12orf29, SNORD22, DCN, BTG1, NDUFA12, CBX5, HOXC6, ATP5MC2, TARBP2, IGFBP6, KRT2.11, AQP5, LALBA, IRAK4, SNORA62, YEATS4, LYZ, IL22, IFNG, U1, AVPR1A, oar-mir-26a, CDK4, MIP, TIMELESS, IL23A, CDK2, MMP19, SLC25A3, ARL1, CRY1, RTCB, TIMP3, MB, EIF3D, IFT27, BCAT1, 7SK, RPS3A, RNase_MRP, PDE6H, SLC2A3, oar-mir-…
3:150500000:1.51e+10	3	150500000	15100000000	14949.5	1707		, 5S_rRNA, SNORD36, SNORD24, U6, QPCT, U4, U7, CNGA3, CIAO1, SNORA70, ATXN7L3B, MYF6, C3H12orf29, SNORD22, DCN, BTG1, NDUFA12, CBX5, HOXC6, ATP5MC2, TARBP2, IGFBP6, KRT2.11, AQP5, LALBA, IRAK4, SNORA62, YEATS4, LYZ, IL22, IFNG, U1, AVPR1A, oar-mir-26a, CDK4, MIP, TIMELESS, IL23A, CDK2, MMP19, SLC25A3, ARL1, CRY1, RTCB, TIMP3, MB, EIF3D, IFT27, BCAT1, 7SK, RPS3A, RNase_MRP, PDE6H, SLC2A3, oar-mir-…
3:2.2e+08:22500000	3	220000000	22500000	-197.5	1707		, 5S_rRNA, SNORD36, SNORD24, U6, QPCT, U4, U7, CNGA3, CIAO1, SNORA70, ATXN7L3B, MYF6, C3H12orf29, SNORD22, DCN, BTG1, NDUFA12, CBX5, HOXC6, ATP5MC2, TARBP2, IGFBP6, KRT2.11, AQP5, LALBA, IRAK4, SNORA62, YEATS4, LYZ, IL22, IFNG, U1, AVPR1A, oar-mir-26a, CDK4, MIP, TIMELESS, IL23A, CDK2, MMP19, SLC25A3, ARL1, CRY1, RTCB, TIMP3, MB, EIF3D, IFT27, BCAT1, 7SK, RPS3A, RNase_MRP, PDE6H, SLC2A3, oar-mir-…
3:2.32e+10:232500000	3	23200000000	232500000	-22967.5	1707		, 5S_rRNA, SNORD36, SNORD24, U6, QPCT, U4, U7, CNGA3, CIAO1, SNORA70, ATXN7L3B, MYF6, C3H12orf29, SNORD22, DCN, BTG1, NDUFA12, CBX5, HOXC6, ATP5MC2, TARBP2, IGFBP6, KRT2.11, AQP5, LALBA, IRAK4, SNORA62, YEATS4, LYZ, IL22, IFNG, U1, AVPR1A, oar-mir-26a, CDK4, MIP, TIMELESS, IL23A, CDK2, MMP19, SLC25A3, ARL1, CRY1, RTCB, TIMP3, MB, EIF3D, IFT27, BCAT1, 7SK, RPS3A, RNase_MRP, PDE6H, SLC2A3, oar-mir-…
3:230500000:2.31e+10	3	230500000	23100000000	22869.5	1707		, 5S_rRNA, SNORD36, SNORD24, U6, QPCT, U4, U7, CNGA3, CIAO1, SNORA70, ATXN7L3B, MYF6, C3H12orf29, SNORD22, DCN, BTG1, NDUFA12, CBX5, HOXC6, ATP5MC2, TARBP2, IGFBP6, KRT2.11, AQP5, LALBA, IRAK4, SNORA62, YEATS4, LYZ, IL22, IFNG, U1, AVPR1A, oar-mir-26a, CDK4, MIP, TIMELESS, IL23A, CDK2, MMP19, SLC25A3, ARL1, CRY1, RTCB, TIMP3, MB, EIF3D, IFT27, BCAT1, 7SK, RPS3A, RNase_MRP, PDE6H, SLC2A3, oar-mir-…
3:3.8e+08:38500000	3	380000000	38500000	-341.5	1707		, 5S_rRNA, SNORD36, SNORD24, U6, QPCT, U4, U7, CNGA3, CIAO1, SNORA70, ATXN7L3B, MYF6, C3H12orf29, SNORD22, DCN, BTG1, NDUFA12, CBX5, HOXC6, ATP5MC2, TARBP2, IGFBP6, KRT2.11, AQP5, LALBA, IRAK4, SNORA62, YEATS4, LYZ, IL22, IFNG, U1, AVPR1A, oar-mir-26a, CDK4, MIP, TIMELESS, IL23A, CDK2, MMP19, SLC25A3, ARL1, CRY1, RTCB, TIMP3, MB, EIF3D, IFT27, BCAT1, 7SK, RPS3A, RNase_MRP, PDE6H, SLC2A3, oar-mir-…
3:78500000:79500000	3	78500000	79500000	1	1707		, 5S_rRNA, SNORD36, SNORD24, U6, QPCT, U4, U7, CNGA3, CIAO1, SNORA70, ATXN7L3B, MYF6, C3H12orf29, SNORD22, DCN, BTG1, NDUFA12, CBX5, HOXC6, ATP5MC2, TARBP2, IGFBP6, KRT2.11, AQP5, LALBA, IRAK4, SNORA62, YEATS4, LYZ, IL22, IFNG, U1, AVPR1A, oar-mir-26a, CDK4, MIP, TIMELESS, IL23A, CDK2, MMP19, SLC25A3, ARL1, CRY1, RTCB, TIMP3, MB, EIF3D, IFT27, BCAT1, 7SK, RPS3A, RNase_MRP, PDE6H, SLC2A3, oar-mir-…
3:85500000:8.6e+08	3	85500000	860000000	774.5	1707		, 5S_rRNA, SNORD36, SNORD24, U6, QPCT, U4, U7, CNGA3, CIAO1, SNORA70, ATXN7L3B, MYF6, C3H12orf29, SNORD22, DCN, BTG1, NDUFA12, CBX5, HOXC6, ATP5MC2, TARBP2, IGFBP6, KRT2.11, AQP5, LALBA, IRAK4, SNORA62, YEATS4, LYZ, IL22, IFNG, U1, AVPR1A, oar-mir-26a, CDK4, MIP, TIMELESS, IL23A, CDK2, MMP19, SLC25A3, ARL1, CRY1, RTCB, TIMP3, MB, EIF3D, IFT27, BCAT1, 7SK, RPS3A, RNase_MRP, PDE6H, SLC2A3, oar-mir-…
4:2.5e+08:25500000	4	250000000	25500000	-224.5	1		NA
4:6.2e+08:62500000	4	620000000	62500000	-557.5	1		NA
5:1.06e+10:106500000	5	10600000000	106500000	-10493.5	129		, MEF2C, U6, 5S_rRNA, CAST, U3, U1, SNORA70
5:7500000:9e+06	5	7500000	9000000	1.5	129		, MEF2C, U6, 5S_rRNA, CAST, U3, U1, SNORA70
5:8.3e+08:83500000	5	830000000	83500000	-746.5	129		, MEF2C, U6, 5S_rRNA, CAST, U3, U1, SNORA70
5:85500000:8.6e+08	5	85500000	860000000	774.5	129		, MEF2C, U6, 5S_rRNA, CAST, U3, U1, SNORA70
5:86500000:8.7e+08	5	86500000	870000000	783.5	129		, MEF2C, U6, 5S_rRNA, CAST, U3, U1, SNORA70
5:9.5e+08:9.6e+08	5	950000000	960000000	10	129		, MEF2C, U6, 5S_rRNA, CAST, U3, U1, SNORA70
5:97500000:9.8e+08	5	97500000	980000000	882.5	129		, MEF2C, U6, 5S_rRNA, CAST, U3, U1, SNORA70
5:9e+07:90500000	5	90000000	90500000	0.5	129		, MEF2C, U6, 5S_rRNA, CAST, U3, U1, SNORA70
6:1.02e+10:102500000	6	10200000000	102500000	-10097.5	316		, SNORD42, ALB, 7SK, CXCL8, CXCL1, RCHY1, U6, U1, CXCL10, SNORA70, U4, SCD5, NUDT9, 5S_rRNA, RAB28, BLOC1S4, HTT
6:1.07e+10:107500000	6	10700000000	107500000	-10592.5	316		, SNORD42, ALB, 7SK, CXCL8, CXCL1, RCHY1, U6, U1, CXCL10, SNORA70, U4, SCD5, NUDT9, 5S_rRNA, RAB28, BLOC1S4, HTT
6:105500000:1.06e+10	6	105500000	10600000000	10494.5	316		, SNORD42, ALB, 7SK, CXCL8, CXCL1, RCHY1, U6, U1, CXCL10, SNORA70, U4, SCD5, NUDT9, 5S_rRNA, RAB28, BLOC1S4, HTT
6:37500000:38500000	6	37500000	38500000	1	316		, SNORD42, ALB, 7SK, CXCL8, CXCL1, RCHY1, U6, U1, CXCL10, SNORA70, U4, SCD5, NUDT9, 5S_rRNA, RAB28, BLOC1S4, HTT
6:5.2e+08:5.3e+08	6	520000000	530000000	10	316		, SNORD42, ALB, 7SK, CXCL8, CXCL1, RCHY1, U6, U1, CXCL10, SNORA70, U4, SCD5, NUDT9, 5S_rRNA, RAB28, BLOC1S4, HTT
6:6.4e+08:64500000	6	640000000	64500000	-575.5	316		, SNORD42, ALB, 7SK, CXCL8, CXCL1, RCHY1, U6, U1, CXCL10, SNORA70, U4, SCD5, NUDT9, 5S_rRNA, RAB28, BLOC1S4, HTT
6:86500000:8.7e+08	6	86500000	870000000	783.5	316		, SNORD42, ALB, 7SK, CXCL8, CXCL1, RCHY1, U6, U1, CXCL10, SNORA70, U4, SCD5, NUDT9, 5S_rRNA, RAB28, BLOC1S4, HTT
7:2.2e+08:22500000	7	220000000	22500000	-197.5	642		, 5S_rRNA, U6, U5, RHOV, CAPN3, Metazoa_SRP, ARF6, U1, PYGL, TPM1, ANXA2, U7, CYP19, TRPM7, FGF7, SLC24A5, DUOX2, BMP4, SNORA72, 7SK, SIX6, SIX1, ESR2, U2, FOS, CIPC, SLIRP, TSHR, Y_RNA, U4, GSTA1, B2M
7:2.4e+08:24500000	7	240000000	24500000	-215.5	642		, 5S_rRNA, U6, U5, RHOV, CAPN3, Metazoa_SRP, ARF6, U1, PYGL, TPM1, ANXA2, U7, CYP19, TRPM7, FGF7, SLC24A5, DUOX2, BMP4, SNORA72, 7SK, SIX6, SIX1, ESR2, U2, FOS, CIPC, SLIRP, TSHR, Y_RNA, U4, GSTA1, B2M
7:31500000:3.2e+08	7	31500000	320000000	288.5	642		, 5S_rRNA, U6, U5, RHOV, CAPN3, Metazoa_SRP, ARF6, U1, PYGL, TPM1, ANXA2, U7, CYP19, TRPM7, FGF7, SLC24A5, DUOX2, BMP4, SNORA72, 7SK, SIX6, SIX1, ESR2, U2, FOS, CIPC, SLIRP, TSHR, Y_RNA, U4, GSTA1, B2M
7:5.9e+08:59500000	7	590000000	59500000	-530.5	642		, 5S_rRNA, U6, U5, RHOV, CAPN3, Metazoa_SRP, ARF6, U1, PYGL, TPM1, ANXA2, U7, CYP19, TRPM7, FGF7, SLC24A5, DUOX2, BMP4, SNORA72, 7SK, SIX6, SIX1, ESR2, U2, FOS, CIPC, SLIRP, TSHR, Y_RNA, U4, GSTA1, B2M
7:6500000:7e+06	7	6500000	7000000	0.5	642		, 5S_rRNA, U6, U5, RHOV, CAPN3, Metazoa_SRP, ARF6, U1, PYGL, TPM1, ANXA2, U7, CYP19, TRPM7, FGF7, SLC24A5, DUOX2, BMP4, SNORA72, 7SK, SIX6, SIX1, ESR2, U2, FOS, CIPC, SLIRP, TSHR, Y_RNA, U4, GSTA1, B2M
7:7.8e+08:78500000	7	780000000	78500000	-701.5	642		, 5S_rRNA, U6, U5, RHOV, CAPN3, Metazoa_SRP, ARF6, U1, PYGL, TPM1, ANXA2, U7, CYP19, TRPM7, FGF7, SLC24A5, DUOX2, BMP4, SNORA72, 7SK, SIX6, SIX1, ESR2, U2, FOS, CIPC, SLIRP, TSHR, Y_RNA, U4, GSTA1, B2M
7:7500000:8e+06	7	7500000	8000000	0.5	642		, 5S_rRNA, U6, U5, RHOV, CAPN3, Metazoa_SRP, ARF6, U1, PYGL, TPM1, ANXA2, U7, CYP19, TRPM7, FGF7, SLC24A5, DUOX2, BMP4, SNORA72, 7SK, SIX6, SIX1, ESR2, U2, FOS, CIPC, SLIRP, TSHR, Y_RNA, U4, GSTA1, B2M
