# Supplementary material for: Comparative Detection of Selection Signatures in Indigenous and Crossbred Turkish Sheep Breeds
Source: Research Square preprint supplement (doi:10.21203/rs.3.rs-7364156/v1), 2025-09-09
Supplement: Supplementary file 8 [file d775911fc5817cc9241d5069.xlsx]

## Sheet: Sheet1
	Table S2. Signatures of selection detected by ROH in Hasak
Region	Chr	Start	Stop	Size_Mb	No_of_genes	Peak_gene	Genes
10:15737169:19191096	10	15737169	19191096	3.45393	337		, U6, U2, SUCLA2, MED4, ITM2B, 5S_rRNA, SNORA70, EEF1AKMT1, GJB2, FBXL3, 7SK, oar-mir-17, oar-mir-19b, DCT
10:22333368:28094532	10	22333368	28094532	5.76116	337		, U6, U2, SUCLA2, MED4, ITM2B, 5S_rRNA, SNORA70, EEF1AKMT1, GJB2, FBXL3, 7SK, oar-mir-17, oar-mir-19b, DCT
10:2329436:4175782	10	2329436	4175782	1.84635	337		, U6, U2, SUCLA2, MED4, ITM2B, 5S_rRNA, SNORA70, EEF1AKMT1, GJB2, FBXL3, 7SK, oar-mir-17, oar-mir-19b, DCT
10:28220524:73847767	10	28220524	73847767	45.6272	337		, U6, U2, SUCLA2, MED4, ITM2B, 5S_rRNA, SNORA70, EEF1AKMT1, GJB2, FBXL3, 7SK, oar-mir-17, oar-mir-19b, DCT
10:30744:1980636	10	30744	1980636	1.94989	337		, U6, U2, SUCLA2, MED4, ITM2B, 5S_rRNA, SNORA70, EEF1AKMT1, GJB2, FBXL3, 7SK, oar-mir-17, oar-mir-19b, DCT
10:5458742:6551668	10	5458742	6551668	1.09293	337		, U6, U2, SUCLA2, MED4, ITM2B, 5S_rRNA, SNORA70, EEF1AKMT1, GJB2, FBXL3, 7SK, oar-mir-17, oar-mir-19b, DCT
10:80992112:82034158	10	80992112	82034158	1.04205	337		, U6, U2, SUCLA2, MED4, ITM2B, 5S_rRNA, SNORA70, EEF1AKMT1, GJB2, FBXL3, 7SK, oar-mir-17, oar-mir-19b, DCT
11:14488866:15587746	11	14488866	15587746	1.09888	561		, U6, HLF, SNORD33, U1, SNORA70, U4, CLDN7, EIF5A, TP53, U8, PMP22, 7SK, B4GALNT2, ATP5MC1, oar-mir-10a, oar-mir-152, K33, V15, KRT35, ACLY, STAT5A, CCR10, U2, Metazoa_SRP, TIMP2, CYGB, AANAT, SLC25A19, ATP5PD, PRKAR1A, 5S_rRNA
11:16459993:17806809	11	16459993	17806809	1.34682	561		, U6, HLF, SNORD33, U1, SNORA70, U4, CLDN7, EIF5A, TP53, U8, PMP22, 7SK, B4GALNT2, ATP5MC1, oar-mir-10a, oar-mir-152, K33, V15, KRT35, ACLY, STAT5A, CCR10, U2, Metazoa_SRP, TIMP2, CYGB, AANAT, SLC25A19, ATP5PD, PRKAR1A, 5S_rRNA
11:26512652:27768083	11	26512652	27768083	1.25543	561		, U6, HLF, SNORD33, U1, SNORA70, U4, CLDN7, EIF5A, TP53, U8, PMP22, 7SK, B4GALNT2, ATP5MC1, oar-mir-10a, oar-mir-152, K33, V15, KRT35, ACLY, STAT5A, CCR10, U2, Metazoa_SRP, TIMP2, CYGB, AANAT, SLC25A19, ATP5PD, PRKAR1A, 5S_rRNA
11:31199802:32612882	11	31199802	32612882	1.41308	561		, U6, HLF, SNORD33, U1, SNORA70, U4, CLDN7, EIF5A, TP53, U8, PMP22, 7SK, B4GALNT2, ATP5MC1, oar-mir-10a, oar-mir-152, K33, V15, KRT35, ACLY, STAT5A, CCR10, U2, Metazoa_SRP, TIMP2, CYGB, AANAT, SLC25A19, ATP5PD, PRKAR1A, 5S_rRNA
11:36514433:37968313	11	36514433	37968313	1.45388	561		, U6, HLF, SNORD33, U1, SNORA70, U4, CLDN7, EIF5A, TP53, U8, PMP22, 7SK, B4GALNT2, ATP5MC1, oar-mir-10a, oar-mir-152, K33, V15, KRT35, ACLY, STAT5A, CCR10, U2, Metazoa_SRP, TIMP2, CYGB, AANAT, SLC25A19, ATP5PD, PRKAR1A, 5S_rRNA
11:39861:4013670	11	39861	4013670	3.97381	561		, U6, HLF, SNORD33, U1, SNORA70, U4, CLDN7, EIF5A, TP53, U8, PMP22, 7SK, B4GALNT2, ATP5MC1, oar-mir-10a, oar-mir-152, K33, V15, KRT35, ACLY, STAT5A, CCR10, U2, Metazoa_SRP, TIMP2, CYGB, AANAT, SLC25A19, ATP5PD, PRKAR1A, 5S_rRNA
11:41118183:44415869	11	41118183	44415869	3.29769	561		, U6, HLF, SNORD33, U1, SNORA70, U4, CLDN7, EIF5A, TP53, U8, PMP22, 7SK, B4GALNT2, ATP5MC1, oar-mir-10a, oar-mir-152, K33, V15, KRT35, ACLY, STAT5A, CCR10, U2, Metazoa_SRP, TIMP2, CYGB, AANAT, SLC25A19, ATP5PD, PRKAR1A, 5S_rRNA
11:4347967:5762157	11	4347967	5762157	1.41419	561		, U6, HLF, SNORD33, U1, SNORA70, U4, CLDN7, EIF5A, TP53, U8, PMP22, 7SK, B4GALNT2, ATP5MC1, oar-mir-10a, oar-mir-152, K33, V15, KRT35, ACLY, STAT5A, CCR10, U2, Metazoa_SRP, TIMP2, CYGB, AANAT, SLC25A19, ATP5PD, PRKAR1A, 5S_rRNA
11:51303888:52525176	11	51303888	52525176	1.22129	561		, U6, HLF, SNORD33, U1, SNORA70, U4, CLDN7, EIF5A, TP53, U8, PMP22, 7SK, B4GALNT2, ATP5MC1, oar-mir-10a, oar-mir-152, K33, V15, KRT35, ACLY, STAT5A, CCR10, U2, Metazoa_SRP, TIMP2, CYGB, AANAT, SLC25A19, ATP5PD, PRKAR1A, 5S_rRNA
11:53621902:57343898	11	53621902	57343898	3.722	561		, U6, HLF, SNORD33, U1, SNORA70, U4, CLDN7, EIF5A, TP53, U8, PMP22, 7SK, B4GALNT2, ATP5MC1, oar-mir-10a, oar-mir-152, K33, V15, KRT35, ACLY, STAT5A, CCR10, U2, Metazoa_SRP, TIMP2, CYGB, AANAT, SLC25A19, ATP5PD, PRKAR1A, 5S_rRNA
11:59149737:61107713	11	59149737	61107713	1.95798	561		, U6, HLF, SNORD33, U1, SNORA70, U4, CLDN7, EIF5A, TP53, U8, PMP22, 7SK, B4GALNT2, ATP5MC1, oar-mir-10a, oar-mir-152, K33, V15, KRT35, ACLY, STAT5A, CCR10, U2, Metazoa_SRP, TIMP2, CYGB, AANAT, SLC25A19, ATP5PD, PRKAR1A, 5S_rRNA
12:20869198:22007309	12	20869198	22007309	1.13811	405		, MYOG, BTG2, REN, TLR5, CAPN2, DEGS1, U6, SNORA70, 5S_rRNA, FH, XCL1, ATP1B1, SNORA66, SELP, SELE, 7SK, oar-mir-199a, oar-mir-200a, oar-mir-200b, ISG15, LAMC2, U5, IRF6, HSD11B1
12:20886:2008838	12	20886	2008838	1.98795	405		, MYOG, BTG2, REN, TLR5, CAPN2, DEGS1, U6, SNORA70, 5S_rRNA, FH, XCL1, ATP1B1, SNORA66, SELP, SELE, 7SK, oar-mir-199a, oar-mir-200a, oar-mir-200b, ISG15, LAMC2, U5, IRF6, HSD11B1
12:24130322:37901692	12	24130322	37901692	13.7714	405		, MYOG, BTG2, REN, TLR5, CAPN2, DEGS1, U6, SNORA70, 5S_rRNA, FH, XCL1, ATP1B1, SNORA66, SELP, SELE, 7SK, oar-mir-199a, oar-mir-200a, oar-mir-200b, ISG15, LAMC2, U5, IRF6, HSD11B1
12:45182698:47193127	12	45182698	47193127	2.01043	405		, MYOG, BTG2, REN, TLR5, CAPN2, DEGS1, U6, SNORA70, 5S_rRNA, FH, XCL1, ATP1B1, SNORA66, SELP, SELE, 7SK, oar-mir-199a, oar-mir-200a, oar-mir-200b, ISG15, LAMC2, U5, IRF6, HSD11B1
12:48014589:51486015	12	48014589	51486015	3.47143	405		, MYOG, BTG2, REN, TLR5, CAPN2, DEGS1, U6, SNORA70, 5S_rRNA, FH, XCL1, ATP1B1, SNORA66, SELP, SELE, 7SK, oar-mir-199a, oar-mir-200a, oar-mir-200b, ISG15, LAMC2, U5, IRF6, HSD11B1
12:54232039:55243846	12	54232039	55243846	1.01181	405		, MYOG, BTG2, REN, TLR5, CAPN2, DEGS1, U6, SNORA70, 5S_rRNA, FH, XCL1, ATP1B1, SNORA66, SELP, SELE, 7SK, oar-mir-199a, oar-mir-200a, oar-mir-200b, ISG15, LAMC2, U5, IRF6, HSD11B1
12:57806857:63448289	12	57806857	63448289	5.64143	405		, MYOG, BTG2, REN, TLR5, CAPN2, DEGS1, U6, SNORA70, 5S_rRNA, FH, XCL1, ATP1B1, SNORA66, SELP, SELE, 7SK, oar-mir-199a, oar-mir-200a, oar-mir-200b, ISG15, LAMC2, U5, IRF6, HSD11B1
12:6502401:8231013	12	6502401	8231013	1.72861	405		, MYOG, BTG2, REN, TLR5, CAPN2, DEGS1, U6, SNORA70, 5S_rRNA, FH, XCL1, ATP1B1, SNORA66, SELP, SELE, 7SK, oar-mir-199a, oar-mir-200a, oar-mir-200b, ISG15, LAMC2, U5, IRF6, HSD11B1
12:67543937:70467912	12	67543937	70467912	2.92397	405		, MYOG, BTG2, REN, TLR5, CAPN2, DEGS1, U6, SNORA70, 5S_rRNA, FH, XCL1, ATP1B1, SNORA66, SELP, SELE, 7SK, oar-mir-199a, oar-mir-200a, oar-mir-200b, ISG15, LAMC2, U5, IRF6, HSD11B1
12:71112730:72744878	12	71112730	72744878	1.63215	405		, MYOG, BTG2, REN, TLR5, CAPN2, DEGS1, U6, SNORA70, 5S_rRNA, FH, XCL1, ATP1B1, SNORA66, SELP, SELE, 7SK, oar-mir-199a, oar-mir-200a, oar-mir-200b, ISG15, LAMC2, U5, IRF6, HSD11B1
13:18023375:26981670	13	18023375	26981670	8.95829	304		, U6, SNORA70, 5S_rRNA, IL2RA, ITGB1, Y_RNA, 7SK, SNORD31, PRNP, PRND, PRNT, AURKA, C13H20orf96, SNORA73, ASIP, EIF6, U5
13:1918436:3238974	13	1918436	3238974	1.32054	304		, U6, SNORA70, 5S_rRNA, IL2RA, ITGB1, Y_RNA, 7SK, SNORD31, PRNP, PRND, PRNT, AURKA, C13H20orf96, SNORA73, ASIP, EIF6, U5
13:42629992:46838773	13	42629992	46838773	4.20878	304		, U6, SNORA70, 5S_rRNA, IL2RA, ITGB1, Y_RNA, 7SK, SNORD31, PRNP, PRND, PRNT, AURKA, C13H20orf96, SNORA73, ASIP, EIF6, U5
13:4433458:5994911	13	4433458	5994911	1.56145	304		, U6, SNORA70, 5S_rRNA, IL2RA, ITGB1, Y_RNA, 7SK, SNORD31, PRNP, PRND, PRNT, AURKA, C13H20orf96, SNORA73, ASIP, EIF6, U5
13:58836661:59926032	13	58836661	59926032	1.08937	304		, U6, SNORA70, 5S_rRNA, IL2RA, ITGB1, Y_RNA, 7SK, SNORD31, PRNP, PRND, PRNT, AURKA, C13H20orf96, SNORA73, ASIP, EIF6, U5
13:62904154:64192612	13	62904154	64192612	1.28846	304		, U6, SNORA70, 5S_rRNA, IL2RA, ITGB1, Y_RNA, 7SK, SNORD31, PRNP, PRND, PRNT, AURKA, C13H20orf96, SNORA73, ASIP, EIF6, U5
13:73647148:75096591	13	73647148	75096591	1.44944	304		, U6, SNORA70, 5S_rRNA, IL2RA, ITGB1, Y_RNA, 7SK, SNORD31, PRNP, PRND, PRNT, AURKA, C13H20orf96, SNORA73, ASIP, EIF6, U5
13:77572002:82691636	13	77572002	82691636	5.11963	304		, U6, SNORA70, 5S_rRNA, IL2RA, ITGB1, Y_RNA, 7SK, SNORD31, PRNP, PRND, PRNT, AURKA, C13H20orf96, SNORA73, ASIP, EIF6, U5
13:9274460:12060907	13	9274460	12060907	2.78645	304		, U6, SNORA70, 5S_rRNA, IL2RA, ITGB1, Y_RNA, 7SK, SNORD31, PRNP, PRND, PRNT, AURKA, C13H20orf96, SNORA73, ASIP, EIF6, U5
14:16098798:58589814	14	16098798	58589814	42.491	1015		, U6, Vault, 7SK, BCO1, 5S_rRNA, SNORA70, HSD17B2, FTO, MMP2, MT3, MT4, ARL2BP, CIAPIN1, U4, HSD11B2, LCAT, SLC12A4, U1, HAMP, EIF3K, ZFP36, SNRPA, BCKDHA, TGFB1, LIPE, RABAC1, BSP5, BSP1, PLAUR, CYTH2, DBP, CA11, IZUMO1, LHB, FLT3LG, SNORD33, SNORD34, oar-mir-150, FCGRT, KLK1
14:67713:8945560	14	67713	8945560	8.87785	1015		, U6, Vault, 7SK, BCO1, 5S_rRNA, SNORA70, HSD17B2, FTO, MMP2, MT3, MT4, ARL2BP, CIAPIN1, U4, HSD11B2, LCAT, SLC12A4, U1, HAMP, EIF3K, ZFP36, SNRPA, BCKDHA, TGFB1, LIPE, RABAC1, BSP5, BSP1, PLAUR, CYTH2, DBP, CA11, IZUMO1, LHB, FLT3LG, SNORD33, SNORD34, oar-mir-150, FCGRT, KLK1
15:11032352:23295033	15	11032352	23295033	12.2627	919		, U6, 5S_rRNA, MMP13, MMP7, YAP1, CRYAB, IL18, BCO2, CD3E, CD3D, SNORA70, RPS25, oar-mir-125b, SNORD14, BMAL1, U5, ILK, ARFIP2, SMPD1, U4, U1, UCP2, SNORD15, 7SK, FSHB, EIF3M, APIP, CRY2, F2, SLC39A13
15:27445630:34156502	15	27445630	34156502	6.71087	919		, U6, 5S_rRNA, MMP13, MMP7, YAP1, CRYAB, IL18, BCO2, CD3E, CD3D, SNORA70, RPS25, oar-mir-125b, SNORD14, BMAL1, U5, ILK, ARFIP2, SMPD1, U4, U1, UCP2, SNORD15, 7SK, FSHB, EIF3M, APIP, CRY2, F2, SLC39A13
15:303495:3347109	15	303495	3347109	3.04361	919		, U6, 5S_rRNA, MMP13, MMP7, YAP1, CRYAB, IL18, BCO2, CD3E, CD3D, SNORA70, RPS25, oar-mir-125b, SNORD14, BMAL1, U5, ILK, ARFIP2, SMPD1, U4, U1, UCP2, SNORD15, 7SK, FSHB, EIF3M, APIP, CRY2, F2, SLC39A13
15:37776247:82049361	15	37776247	82049361	44.2731	919		, U6, 5S_rRNA, MMP13, MMP7, YAP1, CRYAB, IL18, BCO2, CD3E, CD3D, SNORA70, RPS25, oar-mir-125b, SNORD14, BMAL1, U5, ILK, ARFIP2, SMPD1, U4, U1, UCP2, SNORD15, 7SK, FSHB, EIF3M, APIP, CRY2, F2, SLC39A13
15:5327353:9286333	15	5327353	9286333	3.95898	919		, U6, 5S_rRNA, MMP13, MMP7, YAP1, CRYAB, IL18, BCO2, CD3E, CD3D, SNORA70, RPS25, oar-mir-125b, SNORD14, BMAL1, U5, ILK, ARFIP2, SMPD1, U4, U1, UCP2, SNORD15, 7SK, FSHB, EIF3M, APIP, CRY2, F2, SLC39A13
16:24279394:25577171	16	24279394	25577171	1.29778	239		, U6, Metazoa_SRP, 5S_rRNA, AK6, U4, FST, SNORD28, FGF10, CCL28, GHR, U2
16:26149251:36833073	16	26149251	36833073	10.6838	239		, U6, Metazoa_SRP, 5S_rRNA, AK6, U4, FST, SNORD28, FGF10, CCL28, GHR, U2
16:3522005:17238300	16	3522005	17238300	13.7163	239		, U6, Metazoa_SRP, 5S_rRNA, AK6, U4, FST, SNORD28, FGF10, CCL28, GHR, U2
16:37614079:38894630	16	37614079	38894630	1.28055	239		, U6, Metazoa_SRP, 5S_rRNA, AK6, U4, FST, SNORD28, FGF10, CCL28, GHR, U2
16:41101315:50280874	16	41101315	50280874	9.17956	239		, U6, Metazoa_SRP, 5S_rRNA, AK6, U4, FST, SNORD28, FGF10, CCL28, GHR, U2
16:57559016:58608711	16	57559016	58608711	1.0497	239		, U6, Metazoa_SRP, 5S_rRNA, AK6, U4, FST, SNORD28, FGF10, CCL28, GHR, U2
16:62901509:64725253	16	62901509	64725253	1.82374	239		, U6, Metazoa_SRP, 5S_rRNA, AK6, U4, FST, SNORD28, FGF10, CCL28, GHR, U2
17:10704854:11711107	17	10704854	11711107	1.00625	459		, U2, 5S_rRNA, U6, SFRP2, TLR2, TMEM154, SNORD73, 7SK, IL15, SLC7A11, U1, FGF2, U4, IL21, IL2, SNORA72, TDO2, PUS1, SNORA70, RHOF, RNF34, MYL2, RAB21, Metazoa_SRP, CRYBB3
17:12049510:13087625	17	12049510	13087625	1.03811	459		, U2, 5S_rRNA, U6, SFRP2, TLR2, TMEM154, SNORD73, 7SK, IL15, SLC7A11, U1, FGF2, U4, IL21, IL2, SNORA72, TDO2, PUS1, SNORA70, RHOF, RNF34, MYL2, RAB21, Metazoa_SRP, CRYBB3
17:13602006:60641612	17	13602006	60641612	47.0396	459		, U2, 5S_rRNA, U6, SFRP2, TLR2, TMEM154, SNORD73, 7SK, IL15, SLC7A11, U1, FGF2, U4, IL21, IL2, SNORA72, TDO2, PUS1, SNORA70, RHOF, RNF34, MYL2, RAB21, Metazoa_SRP, CRYBB3
17:62572879:63947786	17	62572879	63947786	1.37491	459		, U2, 5S_rRNA, U6, SFRP2, TLR2, TMEM154, SNORD73, 7SK, IL15, SLC7A11, U1, FGF2, U4, IL21, IL2, SNORA72, TDO2, PUS1, SNORA70, RHOF, RNF34, MYL2, RAB21, Metazoa_SRP, CRYBB3
17:64119946:65148996	17	64119946	65148996	1.02905	459		, U2, 5S_rRNA, U6, SFRP2, TLR2, TMEM154, SNORD73, 7SK, IL15, SLC7A11, U1, FGF2, U4, IL21, IL2, SNORA72, TDO2, PUS1, SNORA70, RHOF, RNF34, MYL2, RAB21, Metazoa_SRP, CRYBB3
17:72241:10186078	17	72241	10186078	10.1138	459		, U2, 5S_rRNA, U6, SFRP2, TLR2, TMEM154, SNORD73, 7SK, IL15, SLC7A11, U1, FGF2, U4, IL21, IL2, SNORA72, TDO2, PUS1, SNORA70, RHOF, RNF34, MYL2, RAB21, Metazoa_SRP, CRYBB3
18:15087098:16143360	18	15087098	16143360	1.05626	412		, SNORD116, SNORD115, U6, 5S_rRNA, RHCG, PLIN1, CIB1, FURIN, ARNT2, U4, SNRPA1, CYP1A1, SNORA70, CYP11A1, MCP-3, U1, U3, SRP54, PSMA6, NFKBIA
18:16294429:41180532	18	16294429	41180532	24.8861	412		, SNORD116, SNORD115, U6, 5S_rRNA, RHCG, PLIN1, CIB1, FURIN, ARNT2, U4, SNRPA1, CYP1A1, SNORA70, CYP11A1, MCP-3, U1, U3, SRP54, PSMA6, NFKBIA
18:42456587:44540786	18	42456587	44540786	2.0842	412		, SNORD116, SNORD115, U6, 5S_rRNA, RHCG, PLIN1, CIB1, FURIN, ARNT2, U4, SNRPA1, CYP1A1, SNORA70, CYP11A1, MCP-3, U1, U3, SRP54, PSMA6, NFKBIA
18:45571488:46691852	18	45571488	46691852	1.12036	412		, SNORD116, SNORD115, U6, 5S_rRNA, RHCG, PLIN1, CIB1, FURIN, ARNT2, U4, SNRPA1, CYP1A1, SNORA70, CYP11A1, MCP-3, U1, U3, SRP54, PSMA6, NFKBIA
18:54601487:56729630	18	54601487	56729630	2.12814	412		, SNORD116, SNORD115, U6, 5S_rRNA, RHCG, PLIN1, CIB1, FURIN, ARNT2, U4, SNRPA1, CYP1A1, SNORA70, CYP11A1, MCP-3, U1, U3, SRP54, PSMA6, NFKBIA
18:61139414:62780685	18	61139414	62780685	1.64127	412		, SNORD116, SNORD115, U6, 5S_rRNA, RHCG, PLIN1, CIB1, FURIN, ARNT2, U4, SNRPA1, CYP1A1, SNORA70, CYP11A1, MCP-3, U1, U3, SRP54, PSMA6, NFKBIA
18:62851899:64302140	18	62851899	64302140	1.45024	412		, SNORD116, SNORD115, U6, 5S_rRNA, RHCG, PLIN1, CIB1, FURIN, ARNT2, U4, SNRPA1, CYP1A1, SNORA70, CYP11A1, MCP-3, U1, U3, SRP54, PSMA6, NFKBIA
18:6370530:7380068	18	6370530	7380068	1.00954	412		, SNORD116, SNORD115, U6, 5S_rRNA, RHCG, PLIN1, CIB1, FURIN, ARNT2, U4, SNRPA1, CYP1A1, SNORA70, CYP11A1, MCP-3, U1, U3, SRP54, PSMA6, NFKBIA
18:9153895:11353809	18	9153895	11353809	2.19991	412		, SNORD116, SNORD115, U6, 5S_rRNA, RHCG, PLIN1, CIB1, FURIN, ARNT2, U4, SNRPA1, CYP1A1, SNORA70, CYP11A1, MCP-3, U1, U3, SRP54, PSMA6, NFKBIA
18:97036:2995088	18	97036	2995088	2.89805	412		, SNORD116, SNORD115, U6, 5S_rRNA, RHCG, PLIN1, CIB1, FURIN, ARNT2, U4, SNRPA1, CYP1A1, SNORA70, CYP11A1, MCP-3, U1, U3, SRP54, PSMA6, NFKBIA
19:1008932:3339704	19	1008932	3339704	2.33077	419	U1	U1, , U6, 5S_rRNA, LYZL4, SS18L2, SNORD36, ABHD5, OXTR, ARL8B, BHLHE40, SNORD22, SLC25A26, U3, ARF4, U5, HYAL2, GNAI2, RHOA, IMPDH, oar-mir-191, SLC25A20, CATHL3, BAC5, SC5, ELP6, LTF, CCR3, CCR9, U2, 7SK, PPARG, 5_8S_rRNA, RAB7A
19:14505671:27205341	19	14505671	27205341	12.6997	419	U1	U1, , U6, 5S_rRNA, LYZL4, SS18L2, SNORD36, ABHD5, OXTR, ARL8B, BHLHE40, SNORD22, SLC25A26, U3, ARF4, U5, HYAL2, GNAI2, RHOA, IMPDH, oar-mir-191, SLC25A20, CATHL3, BAC5, SC5, ELP6, LTF, CCR3, CCR9, U2, 7SK, PPARG, 5_8S_rRNA, RAB7A
19:31833784:36104527	19	31833784	36104527	4.27074	419	U1	U1, , U6, 5S_rRNA, LYZL4, SS18L2, SNORD36, ABHD5, OXTR, ARL8B, BHLHE40, SNORD22, SLC25A26, U3, ARF4, U5, HYAL2, GNAI2, RHOA, IMPDH, oar-mir-191, SLC25A20, CATHL3, BAC5, SC5, ELP6, LTF, CCR3, CCR9, U2, 7SK, PPARG, 5_8S_rRNA, RAB7A
19:38926655:45905635	19	38926655	45905635	6.97898	419	U1	U1, , U6, 5S_rRNA, LYZL4, SS18L2, SNORD36, ABHD5, OXTR, ARL8B, BHLHE40, SNORD22, SLC25A26, U3, ARF4, U5, HYAL2, GNAI2, RHOA, IMPDH, oar-mir-191, SLC25A20, CATHL3, BAC5, SC5, ELP6, LTF, CCR3, CCR9, U2, 7SK, PPARG, 5_8S_rRNA, RAB7A
19:49778449:53331593	19	49778449	53331593	3.55314	419	U1	U1, , U6, 5S_rRNA, LYZL4, SS18L2, SNORD36, ABHD5, OXTR, ARL8B, BHLHE40, SNORD22, SLC25A26, U3, ARF4, U5, HYAL2, GNAI2, RHOA, IMPDH, oar-mir-191, SLC25A20, CATHL3, BAC5, SC5, ELP6, LTF, CCR3, CCR9, U2, 7SK, PPARG, 5_8S_rRNA, RAB7A
19:53725393:57507348	19	53725393	57507348	3.78195	419	U1	U1, , U6, 5S_rRNA, LYZL4, SS18L2, SNORD36, ABHD5, OXTR, ARL8B, BHLHE40, SNORD22, SLC25A26, U3, ARF4, U5, HYAL2, GNAI2, RHOA, IMPDH, oar-mir-191, SLC25A20, CATHL3, BAC5, SC5, ELP6, LTF, CCR3, CCR9, U2, 7SK, PPARG, 5_8S_rRNA, RAB7A
19:58797366:59894498	19	58797366	59894498	1.09713	419	U1	U1, , U6, 5S_rRNA, LYZL4, SS18L2, SNORD36, ABHD5, OXTR, ARL8B, BHLHE40, SNORD22, SLC25A26, U3, ARF4, U5, HYAL2, GNAI2, RHOA, IMPDH, oar-mir-191, SLC25A20, CATHL3, BAC5, SC5, ELP6, LTF, CCR3, CCR9, U2, 7SK, PPARG, 5_8S_rRNA, RAB7A
1:104544639:109802783	1	104544639	109802783	5.25814	982		, U6, GUCA2A, Metazoa_SRP, U5, UROD, 5S_rRNA, Vault, SNORA62, PRKAA2, DIRAS3, RABGGTB, U1, 7SK, SLC30A7, HSD3B1, RIT1, BGLAP, CD1D, CD1, FCER1A, SLAMF9, SLAMF1, ITLN, FCGR3A, FCGR2B, SNORA70, RXRG, CD247, RCAN1, ATP5PO, IFNAR1, IFNAR2, SOD1, KAP7, BTG3, oar-mir-99a, U4, CD80, GSK3B, CD86, PDIA5, NCK1, SLCO2A1, U8, NUDT16, SNORA72, RAB5A
1:110064046:111591967	1	110064046	111591967	1.52792	982		, U6, GUCA2A, Metazoa_SRP, U5, UROD, 5S_rRNA, Vault, SNORA62, PRKAA2, DIRAS3, RABGGTB, U1, 7SK, SLC30A7, HSD3B1, RIT1, BGLAP, CD1D, CD1, FCER1A, SLAMF9, SLAMF1, ITLN, FCGR3A, FCGR2B, SNORA70, RXRG, CD247, RCAN1, ATP5PO, IFNAR1, IFNAR2, SOD1, KAP7, BTG3, oar-mir-99a, U4, CD80, GSK3B, CD86, PDIA5, NCK1, SLCO2A1, U8, NUDT16, SNORA72, RAB5A
1:113456591:124765714	1	113456591	124765714	11.3091	982		, U6, GUCA2A, Metazoa_SRP, U5, UROD, 5S_rRNA, Vault, SNORA62, PRKAA2, DIRAS3, RABGGTB, U1, 7SK, SLC30A7, HSD3B1, RIT1, BGLAP, CD1D, CD1, FCER1A, SLAMF9, SLAMF1, ITLN, FCGR3A, FCGR2B, SNORA70, RXRG, CD247, RCAN1, ATP5PO, IFNAR1, IFNAR2, SOD1, KAP7, BTG3, oar-mir-99a, U4, CD80, GSK3B, CD86, PDIA5, NCK1, SLCO2A1, U8, NUDT16, SNORA72, RAB5A
1:125874261:128046390	1	125874261	128046390	2.17213	982		, U6, GUCA2A, Metazoa_SRP, U5, UROD, 5S_rRNA, Vault, SNORA62, PRKAA2, DIRAS3, RABGGTB, U1, 7SK, SLC30A7, HSD3B1, RIT1, BGLAP, CD1D, CD1, FCER1A, SLAMF9, SLAMF1, ITLN, FCGR3A, FCGR2B, SNORA70, RXRG, CD247, RCAN1, ATP5PO, IFNAR1, IFNAR2, SOD1, KAP7, BTG3, oar-mir-99a, U4, CD80, GSK3B, CD86, PDIA5, NCK1, SLCO2A1, U8, NUDT16, SNORA72, RAB5A
1:137441585:138863816	1	137441585	138863816	1.42223	982		, U6, GUCA2A, Metazoa_SRP, U5, UROD, 5S_rRNA, Vault, SNORA62, PRKAA2, DIRAS3, RABGGTB, U1, 7SK, SLC30A7, HSD3B1, RIT1, BGLAP, CD1D, CD1, FCER1A, SLAMF9, SLAMF1, ITLN, FCGR3A, FCGR2B, SNORA70, RXRG, CD247, RCAN1, ATP5PO, IFNAR1, IFNAR2, SOD1, KAP7, BTG3, oar-mir-99a, U4, CD80, GSK3B, CD86, PDIA5, NCK1, SLCO2A1, U8, NUDT16, SNORA72, RAB5A
1:140808812:142352384	1	140808812	142352384	1.54357	982		, U6, GUCA2A, Metazoa_SRP, U5, UROD, 5S_rRNA, Vault, SNORA62, PRKAA2, DIRAS3, RABGGTB, U1, 7SK, SLC30A7, HSD3B1, RIT1, BGLAP, CD1D, CD1, FCER1A, SLAMF9, SLAMF1, ITLN, FCGR3A, FCGR2B, SNORA70, RXRG, CD247, RCAN1, ATP5PO, IFNAR1, IFNAR2, SOD1, KAP7, BTG3, oar-mir-99a, U4, CD80, GSK3B, CD86, PDIA5, NCK1, SLCO2A1, U8, NUDT16, SNORA72, RAB5A
1:148456040:150413799	1	148456040	150413799	1.95776	982		, U6, GUCA2A, Metazoa_SRP, U5, UROD, 5S_rRNA, Vault, SNORA62, PRKAA2, DIRAS3, RABGGTB, U1, 7SK, SLC30A7, HSD3B1, RIT1, BGLAP, CD1D, CD1, FCER1A, SLAMF9, SLAMF1, ITLN, FCGR3A, FCGR2B, SNORA70, RXRG, CD247, RCAN1, ATP5PO, IFNAR1, IFNAR2, SOD1, KAP7, BTG3, oar-mir-99a, U4, CD80, GSK3B, CD86, PDIA5, NCK1, SLCO2A1, U8, NUDT16, SNORA72, RAB5A
1:15302881:16391522	1	15302881	16391522	1.08864	982		, U6, GUCA2A, Metazoa_SRP, U5, UROD, 5S_rRNA, Vault, SNORA62, PRKAA2, DIRAS3, RABGGTB, U1, 7SK, SLC30A7, HSD3B1, RIT1, BGLAP, CD1D, CD1, FCER1A, SLAMF9, SLAMF1, ITLN, FCGR3A, FCGR2B, SNORA70, RXRG, CD247, RCAN1, ATP5PO, IFNAR1, IFNAR2, SOD1, KAP7, BTG3, oar-mir-99a, U4, CD80, GSK3B, CD86, PDIA5, NCK1, SLCO2A1, U8, NUDT16, SNORA72, RAB5A
1:156201442:159292637	1	156201442	159292637	3.09119	982		, U6, GUCA2A, Metazoa_SRP, U5, UROD, 5S_rRNA, Vault, SNORA62, PRKAA2, DIRAS3, RABGGTB, U1, 7SK, SLC30A7, HSD3B1, RIT1, BGLAP, CD1D, CD1, FCER1A, SLAMF9, SLAMF1, ITLN, FCGR3A, FCGR2B, SNORA70, RXRG, CD247, RCAN1, ATP5PO, IFNAR1, IFNAR2, SOD1, KAP7, BTG3, oar-mir-99a, U4, CD80, GSK3B, CD86, PDIA5, NCK1, SLCO2A1, U8, NUDT16, SNORA72, RAB5A
1:175562170:177619398	1	175562170	177619398	2.05723	982		, U6, GUCA2A, Metazoa_SRP, U5, UROD, 5S_rRNA, Vault, SNORA62, PRKAA2, DIRAS3, RABGGTB, U1, 7SK, SLC30A7, HSD3B1, RIT1, BGLAP, CD1D, CD1, FCER1A, SLAMF9, SLAMF1, ITLN, FCGR3A, FCGR2B, SNORA70, RXRG, CD247, RCAN1, ATP5PO, IFNAR1, IFNAR2, SOD1, KAP7, BTG3, oar-mir-99a, U4, CD80, GSK3B, CD86, PDIA5, NCK1, SLCO2A1, U8, NUDT16, SNORA72, RAB5A
1:177856047:178889181	1	177856047	178889181	1.03313	982		, U6, GUCA2A, Metazoa_SRP, U5, UROD, 5S_rRNA, Vault, SNORA62, PRKAA2, DIRAS3, RABGGTB, U1, 7SK, SLC30A7, HSD3B1, RIT1, BGLAP, CD1D, CD1, FCER1A, SLAMF9, SLAMF1, ITLN, FCGR3A, FCGR2B, SNORA70, RXRG, CD247, RCAN1, ATP5PO, IFNAR1, IFNAR2, SOD1, KAP7, BTG3, oar-mir-99a, U4, CD80, GSK3B, CD86, PDIA5, NCK1, SLCO2A1, U8, NUDT16, SNORA72, RAB5A
1:179702822:181330229	1	179702822	181330229	1.62741	982		, U6, GUCA2A, Metazoa_SRP, U5, UROD, 5S_rRNA, Vault, SNORA62, PRKAA2, DIRAS3, RABGGTB, U1, 7SK, SLC30A7, HSD3B1, RIT1, BGLAP, CD1D, CD1, FCER1A, SLAMF9, SLAMF1, ITLN, FCGR3A, FCGR2B, SNORA70, RXRG, CD247, RCAN1, ATP5PO, IFNAR1, IFNAR2, SOD1, KAP7, BTG3, oar-mir-99a, U4, CD80, GSK3B, CD86, PDIA5, NCK1, SLCO2A1, U8, NUDT16, SNORA72, RAB5A
1:18051414:22739177	1	18051414	22739177	4.68776	982		, U6, GUCA2A, Metazoa_SRP, U5, UROD, 5S_rRNA, Vault, SNORA62, PRKAA2, DIRAS3, RABGGTB, U1, 7SK, SLC30A7, HSD3B1, RIT1, BGLAP, CD1D, CD1, FCER1A, SLAMF9, SLAMF1, ITLN, FCGR3A, FCGR2B, SNORA70, RXRG, CD247, RCAN1, ATP5PO, IFNAR1, IFNAR2, SOD1, KAP7, BTG3, oar-mir-99a, U4, CD80, GSK3B, CD86, PDIA5, NCK1, SLCO2A1, U8, NUDT16, SNORA72, RAB5A
1:181651850:187001507	1	181651850	187001507	5.34966	982		, U6, GUCA2A, Metazoa_SRP, U5, UROD, 5S_rRNA, Vault, SNORA62, PRKAA2, DIRAS3, RABGGTB, U1, 7SK, SLC30A7, HSD3B1, RIT1, BGLAP, CD1D, CD1, FCER1A, SLAMF9, SLAMF1, ITLN, FCGR3A, FCGR2B, SNORA70, RXRG, CD247, RCAN1, ATP5PO, IFNAR1, IFNAR2, SOD1, KAP7, BTG3, oar-mir-99a, U4, CD80, GSK3B, CD86, PDIA5, NCK1, SLCO2A1, U8, NUDT16, SNORA72, RAB5A
1:204636861:206279382	1	204636861	206279382	1.64252	982		, U6, GUCA2A, Metazoa_SRP, U5, UROD, 5S_rRNA, Vault, SNORA62, PRKAA2, DIRAS3, RABGGTB, U1, 7SK, SLC30A7, HSD3B1, RIT1, BGLAP, CD1D, CD1, FCER1A, SLAMF9, SLAMF1, ITLN, FCGR3A, FCGR2B, SNORA70, RXRG, CD247, RCAN1, ATP5PO, IFNAR1, IFNAR2, SOD1, KAP7, BTG3, oar-mir-99a, U4, CD80, GSK3B, CD86, PDIA5, NCK1, SLCO2A1, U8, NUDT16, SNORA72, RAB5A
1:208070059:209274815	1	208070059	209274815	1.20476	982		, U6, GUCA2A, Metazoa_SRP, U5, UROD, 5S_rRNA, Vault, SNORA62, PRKAA2, DIRAS3, RABGGTB, U1, 7SK, SLC30A7, HSD3B1, RIT1, BGLAP, CD1D, CD1, FCER1A, SLAMF9, SLAMF1, ITLN, FCGR3A, FCGR2B, SNORA70, RXRG, CD247, RCAN1, ATP5PO, IFNAR1, IFNAR2, SOD1, KAP7, BTG3, oar-mir-99a, U4, CD80, GSK3B, CD86, PDIA5, NCK1, SLCO2A1, U8, NUDT16, SNORA72, RAB5A
1:215850280:217512887	1	215850280	217512887	1.66261	982		, U6, GUCA2A, Metazoa_SRP, U5, UROD, 5S_rRNA, Vault, SNORA62, PRKAA2, DIRAS3, RABGGTB, U1, 7SK, SLC30A7, HSD3B1, RIT1, BGLAP, CD1D, CD1, FCER1A, SLAMF9, SLAMF1, ITLN, FCGR3A, FCGR2B, SNORA70, RXRG, CD247, RCAN1, ATP5PO, IFNAR1, IFNAR2, SOD1, KAP7, BTG3, oar-mir-99a, U4, CD80, GSK3B, CD86, PDIA5, NCK1, SLCO2A1, U8, NUDT16, SNORA72, RAB5A
1:24181124:32413054	1	24181124	32413054	8.23193	982		, U6, GUCA2A, Metazoa_SRP, U5, UROD, 5S_rRNA, Vault, SNORA62, PRKAA2, DIRAS3, RABGGTB, U1, 7SK, SLC30A7, HSD3B1, RIT1, BGLAP, CD1D, CD1, FCER1A, SLAMF9, SLAMF1, ITLN, FCGR3A, FCGR2B, SNORA70, RXRG, CD247, RCAN1, ATP5PO, IFNAR1, IFNAR2, SOD1, KAP7, BTG3, oar-mir-99a, U4, CD80, GSK3B, CD86, PDIA5, NCK1, SLCO2A1, U8, NUDT16, SNORA72, RAB5A
1:244747883:248193080	1	244747883	248193080	3.4452	982		, U6, GUCA2A, Metazoa_SRP, U5, UROD, 5S_rRNA, Vault, SNORA62, PRKAA2, DIRAS3, RABGGTB, U1, 7SK, SLC30A7, HSD3B1, RIT1, BGLAP, CD1D, CD1, FCER1A, SLAMF9, SLAMF1, ITLN, FCGR3A, FCGR2B, SNORA70, RXRG, CD247, RCAN1, ATP5PO, IFNAR1, IFNAR2, SOD1, KAP7, BTG3, oar-mir-99a, U4, CD80, GSK3B, CD86, PDIA5, NCK1, SLCO2A1, U8, NUDT16, SNORA72, RAB5A
1:249117625:250368697	1	249117625	250368697	1.25107	982		, U6, GUCA2A, Metazoa_SRP, U5, UROD, 5S_rRNA, Vault, SNORA62, PRKAA2, DIRAS3, RABGGTB, U1, 7SK, SLC30A7, HSD3B1, RIT1, BGLAP, CD1D, CD1, FCER1A, SLAMF9, SLAMF1, ITLN, FCGR3A, FCGR2B, SNORA70, RXRG, CD247, RCAN1, ATP5PO, IFNAR1, IFNAR2, SOD1, KAP7, BTG3, oar-mir-99a, U4, CD80, GSK3B, CD86, PDIA5, NCK1, SLCO2A1, U8, NUDT16, SNORA72, RAB5A
1:250780840:254014146	1	250780840	254014146	3.23331	982		, U6, GUCA2A, Metazoa_SRP, U5, UROD, 5S_rRNA, Vault, SNORA62, PRKAA2, DIRAS3, RABGGTB, U1, 7SK, SLC30A7, HSD3B1, RIT1, BGLAP, CD1D, CD1, FCER1A, SLAMF9, SLAMF1, ITLN, FCGR3A, FCGR2B, SNORA70, RXRG, CD247, RCAN1, ATP5PO, IFNAR1, IFNAR2, SOD1, KAP7, BTG3, oar-mir-99a, U4, CD80, GSK3B, CD86, PDIA5, NCK1, SLCO2A1, U8, NUDT16, SNORA72, RAB5A
1:254961266:257412697	1	254961266	257412697	2.45143	982		, U6, GUCA2A, Metazoa_SRP, U5, UROD, 5S_rRNA, Vault, SNORA62, PRKAA2, DIRAS3, RABGGTB, U1, 7SK, SLC30A7, HSD3B1, RIT1, BGLAP, CD1D, CD1, FCER1A, SLAMF9, SLAMF1, ITLN, FCGR3A, FCGR2B, SNORA70, RXRG, CD247, RCAN1, ATP5PO, IFNAR1, IFNAR2, SOD1, KAP7, BTG3, oar-mir-99a, U4, CD80, GSK3B, CD86, PDIA5, NCK1, SLCO2A1, U8, NUDT16, SNORA72, RAB5A
1:265322893:273868392	1	265322893	273868392	8.5455	982		, U6, GUCA2A, Metazoa_SRP, U5, UROD, 5S_rRNA, Vault, SNORA62, PRKAA2, DIRAS3, RABGGTB, U1, 7SK, SLC30A7, HSD3B1, RIT1, BGLAP, CD1D, CD1, FCER1A, SLAMF9, SLAMF1, ITLN, FCGR3A, FCGR2B, SNORA70, RXRG, CD247, RCAN1, ATP5PO, IFNAR1, IFNAR2, SOD1, KAP7, BTG3, oar-mir-99a, U4, CD80, GSK3B, CD86, PDIA5, NCK1, SLCO2A1, U8, NUDT16, SNORA72, RAB5A
1:274019788:275578414	1	274019788	275578414	1.55863	982		, U6, GUCA2A, Metazoa_SRP, U5, UROD, 5S_rRNA, Vault, SNORA62, PRKAA2, DIRAS3, RABGGTB, U1, 7SK, SLC30A7, HSD3B1, RIT1, BGLAP, CD1D, CD1, FCER1A, SLAMF9, SLAMF1, ITLN, FCGR3A, FCGR2B, SNORA70, RXRG, CD247, RCAN1, ATP5PO, IFNAR1, IFNAR2, SOD1, KAP7, BTG3, oar-mir-99a, U4, CD80, GSK3B, CD86, PDIA5, NCK1, SLCO2A1, U8, NUDT16, SNORA72, RAB5A
1:35367095:36621076	1	35367095	36621076	1.25398	982		, U6, GUCA2A, Metazoa_SRP, U5, UROD, 5S_rRNA, Vault, SNORA62, PRKAA2, DIRAS3, RABGGTB, U1, 7SK, SLC30A7, HSD3B1, RIT1, BGLAP, CD1D, CD1, FCER1A, SLAMF9, SLAMF1, ITLN, FCGR3A, FCGR2B, SNORA70, RXRG, CD247, RCAN1, ATP5PO, IFNAR1, IFNAR2, SOD1, KAP7, BTG3, oar-mir-99a, U4, CD80, GSK3B, CD86, PDIA5, NCK1, SLCO2A1, U8, NUDT16, SNORA72, RAB5A
1:42989607:44262410	1	42989607	44262410	1.2728	982		, U6, GUCA2A, Metazoa_SRP, U5, UROD, 5S_rRNA, Vault, SNORA62, PRKAA2, DIRAS3, RABGGTB, U1, 7SK, SLC30A7, HSD3B1, RIT1, BGLAP, CD1D, CD1, FCER1A, SLAMF9, SLAMF1, ITLN, FCGR3A, FCGR2B, SNORA70, RXRG, CD247, RCAN1, ATP5PO, IFNAR1, IFNAR2, SOD1, KAP7, BTG3, oar-mir-99a, U4, CD80, GSK3B, CD86, PDIA5, NCK1, SLCO2A1, U8, NUDT16, SNORA72, RAB5A
1:44391021:54680471	1	44391021	54680471	10.2895	982		, U6, GUCA2A, Metazoa_SRP, U5, UROD, 5S_rRNA, Vault, SNORA62, PRKAA2, DIRAS3, RABGGTB, U1, 7SK, SLC30A7, HSD3B1, RIT1, BGLAP, CD1D, CD1, FCER1A, SLAMF9, SLAMF1, ITLN, FCGR3A, FCGR2B, SNORA70, RXRG, CD247, RCAN1, ATP5PO, IFNAR1, IFNAR2, SOD1, KAP7, BTG3, oar-mir-99a, U4, CD80, GSK3B, CD86, PDIA5, NCK1, SLCO2A1, U8, NUDT16, SNORA72, RAB5A
1:71477783:73900697	1	71477783	73900697	2.42291	982		, U6, GUCA2A, Metazoa_SRP, U5, UROD, 5S_rRNA, Vault, SNORA62, PRKAA2, DIRAS3, RABGGTB, U1, 7SK, SLC30A7, HSD3B1, RIT1, BGLAP, CD1D, CD1, FCER1A, SLAMF9, SLAMF1, ITLN, FCGR3A, FCGR2B, SNORA70, RXRG, CD247, RCAN1, ATP5PO, IFNAR1, IFNAR2, SOD1, KAP7, BTG3, oar-mir-99a, U4, CD80, GSK3B, CD86, PDIA5, NCK1, SLCO2A1, U8, NUDT16, SNORA72, RAB5A
1:74698979:78249058	1	74698979	78249058	3.55008	982		, U6, GUCA2A, Metazoa_SRP, U5, UROD, 5S_rRNA, Vault, SNORA62, PRKAA2, DIRAS3, RABGGTB, U1, 7SK, SLC30A7, HSD3B1, RIT1, BGLAP, CD1D, CD1, FCER1A, SLAMF9, SLAMF1, ITLN, FCGR3A, FCGR2B, SNORA70, RXRG, CD247, RCAN1, ATP5PO, IFNAR1, IFNAR2, SOD1, KAP7, BTG3, oar-mir-99a, U4, CD80, GSK3B, CD86, PDIA5, NCK1, SLCO2A1, U8, NUDT16, SNORA72, RAB5A
1:81190100:83737754	1	81190100	83737754	2.54765	982		, U6, GUCA2A, Metazoa_SRP, U5, UROD, 5S_rRNA, Vault, SNORA62, PRKAA2, DIRAS3, RABGGTB, U1, 7SK, SLC30A7, HSD3B1, RIT1, BGLAP, CD1D, CD1, FCER1A, SLAMF9, SLAMF1, ITLN, FCGR3A, FCGR2B, SNORA70, RXRG, CD247, RCAN1, ATP5PO, IFNAR1, IFNAR2, SOD1, KAP7, BTG3, oar-mir-99a, U4, CD80, GSK3B, CD86, PDIA5, NCK1, SLCO2A1, U8, NUDT16, SNORA72, RAB5A
1:94455960:96218923	1	94455960	96218923	1.76296	982		, U6, GUCA2A, Metazoa_SRP, U5, UROD, 5S_rRNA, Vault, SNORA62, PRKAA2, DIRAS3, RABGGTB, U1, 7SK, SLC30A7, HSD3B1, RIT1, BGLAP, CD1D, CD1, FCER1A, SLAMF9, SLAMF1, ITLN, FCGR3A, FCGR2B, SNORA70, RXRG, CD247, RCAN1, ATP5PO, IFNAR1, IFNAR2, SOD1, KAP7, BTG3, oar-mir-99a, U4, CD80, GSK3B, CD86, PDIA5, NCK1, SLCO2A1, U8, NUDT16, SNORA72, RAB5A
20:17865559:19276969	20	17865559	19276969	1.41141	446		, U6, 5S_rRNA, DYA, PSMB8, SLC39A7, TAPBP, MLN, SNORA70, U7, MAPK14, MAPK13, SRSF3, CDKN1A, PIM1, CRISP3, 7SK, DQA, HSPA1A, CSNK2B, PRP2, UBE2N, PRL, GMPR, DTNBP1, EDN1, TFAP2A, U1, SERPINB1
20:20897900:26704963	20	20897900	26704963	5.80706	446		, U6, 5S_rRNA, DYA, PSMB8, SLC39A7, TAPBP, MLN, SNORA70, U7, MAPK14, MAPK13, SRSF3, CDKN1A, PIM1, CRISP3, 7SK, DQA, HSPA1A, CSNK2B, PRP2, UBE2N, PRL, GMPR, DTNBP1, EDN1, TFAP2A, U1, SERPINB1
20:32202403:55380346	20	32202403	55380346	23.1779	446		, U6, 5S_rRNA, DYA, PSMB8, SLC39A7, TAPBP, MLN, SNORA70, U7, MAPK14, MAPK13, SRSF3, CDKN1A, PIM1, CRISP3, 7SK, DQA, HSPA1A, CSNK2B, PRP2, UBE2N, PRL, GMPR, DTNBP1, EDN1, TFAP2A, U1, SERPINB1
20:337539:12413750	20	337539	12413750	12.0762	446		, U6, 5S_rRNA, DYA, PSMB8, SLC39A7, TAPBP, MLN, SNORA70, U7, MAPK14, MAPK13, SRSF3, CDKN1A, PIM1, CRISP3, 7SK, DQA, HSPA1A, CSNK2B, PRP2, UBE2N, PRL, GMPR, DTNBP1, EDN1, TFAP2A, U1, SERPINB1
21:22363:10612645	21	22363	10612645	10.5903	270		, MTNR1B, U6, TYR, SNORD30, SDHAF2, FEN1, FTH1, SNORA70, SCGB1A1, POLR2G, U2, SNORD22, SNORD31, SNORD29, SNORD28, SNORD27, SNORD26, SNORD25, 5S_rRNA, PYGM, oar-mir-194, ARL2, CAPN1
21:33117674:34759456	21	33117674	34759456	1.64178	270		, MTNR1B, U6, TYR, SNORD30, SDHAF2, FEN1, FTH1, SNORA70, SCGB1A1, POLR2G, U2, SNORD22, SNORD31, SNORD29, SNORD28, SNORD27, SNORD26, SNORD25, 5S_rRNA, PYGM, oar-mir-194, ARL2, CAPN1
21:39306924:40344141	21	39306924	40344141	1.03722	270		, MTNR1B, U6, TYR, SNORD30, SDHAF2, FEN1, FTH1, SNORA70, SCGB1A1, POLR2G, U2, SNORD22, SNORD31, SNORD29, SNORD28, SNORD27, SNORD26, SNORD25, 5S_rRNA, PYGM, oar-mir-194, ARL2, CAPN1
21:40451609:43092067	21	40451609	43092067	2.64046	270		, MTNR1B, U6, TYR, SNORD30, SDHAF2, FEN1, FTH1, SNORA70, SCGB1A1, POLR2G, U2, SNORD22, SNORD31, SNORD29, SNORD28, SNORD27, SNORD26, SNORD25, 5S_rRNA, PYGM, oar-mir-194, ARL2, CAPN1
22:17622066:18778894	22	17622066	18778894	1.15683	156		, U3, U6, LIPA, oar-mir-107, U7, ANKRD1, SNORD96, 5S_rRNA
22:23167765:24647738	22	23167765	24647738	1.47997	156		, U3, U6, LIPA, oar-mir-107, U7, ANKRD1, SNORD96, 5S_rRNA
22:25756226:27418225	22	25756226	27418225	1.662	156		, U3, U6, LIPA, oar-mir-107, U7, ANKRD1, SNORD96, 5S_rRNA
22:27761636:29033348	22	27761636	29033348	1.27171	156		, U3, U6, LIPA, oar-mir-107, U7, ANKRD1, SNORD96, 5S_rRNA
22:36231046:37563209	22	36231046	37563209	1.33216	156		, U3, U6, LIPA, oar-mir-107, U7, ANKRD1, SNORD96, 5S_rRNA
22:41620:5687540	22	41620	5687540	5.64592	156		, U3, U6, LIPA, oar-mir-107, U7, ANKRD1, SNORD96, 5S_rRNA
22:44647841:45678632	22	44647841	45678632	1.03079	156		, U3, U6, LIPA, oar-mir-107, U7, ANKRD1, SNORD96, 5S_rRNA
22:6433310:13559032	22	6433310	13559032	7.12572	156		, U3, U6, LIPA, oar-mir-107, U7, ANKRD1, SNORD96, 5S_rRNA
23:12139173:32386691	23	12139173	32386691	20.2475	146		, 5S_rRNA, Metazoa_SRP, U6, 7SK, TTR, U1, AQP4, METTL4, MRCL3, SNORA70
23:32932393:34788536	23	32932393	34788536	1.85614	146		, 5S_rRNA, Metazoa_SRP, U6, 7SK, TTR, U1, AQP4, METTL4, MRCL3, SNORA70
23:36959489:38176015	23	36959489	38176015	1.21653	146		, 5S_rRNA, Metazoa_SRP, U6, 7SK, TTR, U1, AQP4, METTL4, MRCL3, SNORA70
23:60999756:62030797	23	60999756	62030797	1.03104	146		, 5S_rRNA, Metazoa_SRP, U6, 7SK, TTR, U1, AQP4, METTL4, MRCL3, SNORA70
24:16239943:31332492	24	16239943	31332492	15.0925	574		, SSTR5, TPSB2, ATP6V0C, U5, U6, 5S_rRNA, U2, NUBP1, ARL6IP1, IL21R, EIF3C, MYL11, ITGAL, PHKG2, STX1B, ITGAM, PSPH, SNORD14, 5_8S_rRNA, CLDN4, SERPINE1
24:31586376:33503397	24	31586376	33503397	1.91702	574		, SSTR5, TPSB2, ATP6V0C, U5, U6, 5S_rRNA, U2, NUBP1, ARL6IP1, IL21R, EIF3C, MYL11, ITGAL, PHKG2, STX1B, ITGAM, PSPH, SNORD14, 5_8S_rRNA, CLDN4, SERPINE1
24:34128345:35582464	24	34128345	35582464	1.45412	574		, SSTR5, TPSB2, ATP6V0C, U5, U6, 5S_rRNA, U2, NUBP1, ARL6IP1, IL21R, EIF3C, MYL11, ITGAL, PHKG2, STX1B, ITGAM, PSPH, SNORD14, 5_8S_rRNA, CLDN4, SERPINE1
24:46191:10902422	24	46191	10902422	10.8562	574		, SSTR5, TPSB2, ATP6V0C, U5, U6, 5S_rRNA, U2, NUBP1, ARL6IP1, IL21R, EIF3C, MYL11, ITGAL, PHKG2, STX1B, ITGAM, PSPH, SNORD14, 5_8S_rRNA, CLDN4, SERPINE1
25:13017868:16302797	25	13017868	16302797	3.28493	265	U6	U6, , 5S_rRNA, Y_RNA, PLAU, SFTPA1, BMPR1A, GLUD1, SNORA74
25:17319798:18542291	25	17319798	18542291	1.22249	265	U6	U6, , 5S_rRNA, Y_RNA, PLAU, SFTPA1, BMPR1A, GLUD1, SNORA74
25:25250588:29454744	25	25250588	29454744	4.20416	265	U6	U6, , 5S_rRNA, Y_RNA, PLAU, SFTPA1, BMPR1A, GLUD1, SNORA74
25:29590702:33192146	25	29590702	33192146	3.60144	265	U6	U6, , 5S_rRNA, Y_RNA, PLAU, SFTPA1, BMPR1A, GLUD1, SNORA74
25:33255807:48174626	25	33255807	48174626	14.9188	265	U6	U6, , 5S_rRNA, Y_RNA, PLAU, SFTPA1, BMPR1A, GLUD1, SNORA74
25:5664702:10467020	25	5664702	10467020	4.80232	265	U6	U6, , 5S_rRNA, Y_RNA, PLAU, SFTPA1, BMPR1A, GLUD1, SNORA74
26:103286:2849783	26	103286	2849783	2.7465	143		, U6, IRF2, SLC25A4, MBOAT4, Metazoa_SRP, 7SK, ADRB3, STAR, LSM1, IDO1, 5S_rRNA, SNORA70
26:13349297:14430243	26	13349297	14430243	1.08095	143		, U6, IRF2, SLC25A4, MBOAT4, Metazoa_SRP, 7SK, ADRB3, STAR, LSM1, IDO1, 5S_rRNA, SNORA70
26:22456940:28057128	26	22456940	28057128	5.60019	143		, U6, IRF2, SLC25A4, MBOAT4, Metazoa_SRP, 7SK, ADRB3, STAR, LSM1, IDO1, 5S_rRNA, SNORA70
26:28183279:30625379	26	28183279	30625379	2.4421	143		, U6, IRF2, SLC25A4, MBOAT4, Metazoa_SRP, 7SK, ADRB3, STAR, LSM1, IDO1, 5S_rRNA, SNORA70
26:31582769:34804161	26	31582769	34804161	3.22139	143		, U6, IRF2, SLC25A4, MBOAT4, Metazoa_SRP, 7SK, ADRB3, STAR, LSM1, IDO1, 5S_rRNA, SNORA70
26:41441325:44441243	26	41441325	44441243	2.99992	143		, U6, IRF2, SLC25A4, MBOAT4, Metazoa_SRP, 7SK, ADRB3, STAR, LSM1, IDO1, 5S_rRNA, SNORA70
2:132551392:134146443	2	132551392	134146443	1.59505	1147		, U6, GSN, LPAR1, 5S_rRNA, TXN, U2, KLF4, SNORA70, ALDOB, Vault, NFIL3, oar-let-7d, oar-let-7a, UBQLN1, U1, B4GALT1, U4, LPL, 7SK, RNase_MRP, RRAGA, PLIN2, NDUFB6, CTSB, GLRX, oar-mir-10b, ITGB6, U12, IDH1, IGFBP5, SLC11A1, oar-mir-26b, PRKAG3, TUBA4A, SNORD39, INHA, ITM2C, SNORA75, SNORD82, COPS7B, SNORA62, LCK, SNORA73, EYA3
2:134244688:144157509	2	134244688	144157509	9.91282	1147		, U6, GSN, LPAR1, 5S_rRNA, TXN, U2, KLF4, SNORA70, ALDOB, Vault, NFIL3, oar-let-7d, oar-let-7a, UBQLN1, U1, B4GALT1, U4, LPL, 7SK, RNase_MRP, RRAGA, PLIN2, NDUFB6, CTSB, GLRX, oar-mir-10b, ITGB6, U12, IDH1, IGFBP5, SLC11A1, oar-mir-26b, PRKAG3, TUBA4A, SNORD39, INHA, ITM2C, SNORA75, SNORD82, COPS7B, SNORA62, LCK, SNORA73, EYA3
2:146941655:148650062	2	146941655	148650062	1.70841	1147		, U6, GSN, LPAR1, 5S_rRNA, TXN, U2, KLF4, SNORA70, ALDOB, Vault, NFIL3, oar-let-7d, oar-let-7a, UBQLN1, U1, B4GALT1, U4, LPL, 7SK, RNase_MRP, RRAGA, PLIN2, NDUFB6, CTSB, GLRX, oar-mir-10b, ITGB6, U12, IDH1, IGFBP5, SLC11A1, oar-mir-26b, PRKAG3, TUBA4A, SNORD39, INHA, ITM2C, SNORA75, SNORD82, COPS7B, SNORA62, LCK, SNORA73, EYA3
2:148800659:150249776	2	148800659	150249776	1.44912	1147		, U6, GSN, LPAR1, 5S_rRNA, TXN, U2, KLF4, SNORA70, ALDOB, Vault, NFIL3, oar-let-7d, oar-let-7a, UBQLN1, U1, B4GALT1, U4, LPL, 7SK, RNase_MRP, RRAGA, PLIN2, NDUFB6, CTSB, GLRX, oar-mir-10b, ITGB6, U12, IDH1, IGFBP5, SLC11A1, oar-mir-26b, PRKAG3, TUBA4A, SNORD39, INHA, ITM2C, SNORA75, SNORD82, COPS7B, SNORA62, LCK, SNORA73, EYA3
2:15388156:40191892	2	15388156	40191892	24.8037	1147		, U6, GSN, LPAR1, 5S_rRNA, TXN, U2, KLF4, SNORA70, ALDOB, Vault, NFIL3, oar-let-7d, oar-let-7a, UBQLN1, U1, B4GALT1, U4, LPL, 7SK, RNase_MRP, RRAGA, PLIN2, NDUFB6, CTSB, GLRX, oar-mir-10b, ITGB6, U12, IDH1, IGFBP5, SLC11A1, oar-mir-26b, PRKAG3, TUBA4A, SNORD39, INHA, ITM2C, SNORA75, SNORD82, COPS7B, SNORA62, LCK, SNORA73, EYA3
2:158066:4209909	2	158066	4209909	4.05184	1147		, U6, GSN, LPAR1, 5S_rRNA, TXN, U2, KLF4, SNORA70, ALDOB, Vault, NFIL3, oar-let-7d, oar-let-7a, UBQLN1, U1, B4GALT1, U4, LPL, 7SK, RNase_MRP, RRAGA, PLIN2, NDUFB6, CTSB, GLRX, oar-mir-10b, ITGB6, U12, IDH1, IGFBP5, SLC11A1, oar-mir-26b, PRKAG3, TUBA4A, SNORD39, INHA, ITM2C, SNORA75, SNORD82, COPS7B, SNORA62, LCK, SNORA73, EYA3
2:166741056:168039980	2	166741056	168039980	1.29892	1147		, U6, GSN, LPAR1, 5S_rRNA, TXN, U2, KLF4, SNORA70, ALDOB, Vault, NFIL3, oar-let-7d, oar-let-7a, UBQLN1, U1, B4GALT1, U4, LPL, 7SK, RNase_MRP, RRAGA, PLIN2, NDUFB6, CTSB, GLRX, oar-mir-10b, ITGB6, U12, IDH1, IGFBP5, SLC11A1, oar-mir-26b, PRKAG3, TUBA4A, SNORD39, INHA, ITM2C, SNORA75, SNORD82, COPS7B, SNORA62, LCK, SNORA73, EYA3
2:207669683:210231988	2	207669683	210231988	2.5623	1147		, U6, GSN, LPAR1, 5S_rRNA, TXN, U2, KLF4, SNORA70, ALDOB, Vault, NFIL3, oar-let-7d, oar-let-7a, UBQLN1, U1, B4GALT1, U4, LPL, 7SK, RNase_MRP, RRAGA, PLIN2, NDUFB6, CTSB, GLRX, oar-mir-10b, ITGB6, U12, IDH1, IGFBP5, SLC11A1, oar-mir-26b, PRKAG3, TUBA4A, SNORD39, INHA, ITM2C, SNORA75, SNORD82, COPS7B, SNORA62, LCK, SNORA73, EYA3
2:211906297:222663195	2	211906297	222663195	10.7569	1147		, U6, GSN, LPAR1, 5S_rRNA, TXN, U2, KLF4, SNORA70, ALDOB, Vault, NFIL3, oar-let-7d, oar-let-7a, UBQLN1, U1, B4GALT1, U4, LPL, 7SK, RNase_MRP, RRAGA, PLIN2, NDUFB6, CTSB, GLRX, oar-mir-10b, ITGB6, U12, IDH1, IGFBP5, SLC11A1, oar-mir-26b, PRKAG3, TUBA4A, SNORD39, INHA, ITM2C, SNORA75, SNORD82, COPS7B, SNORA62, LCK, SNORA73, EYA3
2:225076084:226241523	2	225076084	226241523	1.16544	1147		, U6, GSN, LPAR1, 5S_rRNA, TXN, U2, KLF4, SNORA70, ALDOB, Vault, NFIL3, oar-let-7d, oar-let-7a, UBQLN1, U1, B4GALT1, U4, LPL, 7SK, RNase_MRP, RRAGA, PLIN2, NDUFB6, CTSB, GLRX, oar-mir-10b, ITGB6, U12, IDH1, IGFBP5, SLC11A1, oar-mir-26b, PRKAG3, TUBA4A, SNORD39, INHA, ITM2C, SNORA75, SNORD82, COPS7B, SNORA62, LCK, SNORA73, EYA3
2:231146456:234572922	2	231146456	234572922	3.42647	1147		, U6, GSN, LPAR1, 5S_rRNA, TXN, U2, KLF4, SNORA70, ALDOB, Vault, NFIL3, oar-let-7d, oar-let-7a, UBQLN1, U1, B4GALT1, U4, LPL, 7SK, RNase_MRP, RRAGA, PLIN2, NDUFB6, CTSB, GLRX, oar-mir-10b, ITGB6, U12, IDH1, IGFBP5, SLC11A1, oar-mir-26b, PRKAG3, TUBA4A, SNORD39, INHA, ITM2C, SNORA75, SNORD82, COPS7B, SNORA62, LCK, SNORA73, EYA3
2:237664723:238942933	2	237664723	238942933	1.27821	1147		, U6, GSN, LPAR1, 5S_rRNA, TXN, U2, KLF4, SNORA70, ALDOB, Vault, NFIL3, oar-let-7d, oar-let-7a, UBQLN1, U1, B4GALT1, U4, LPL, 7SK, RNase_MRP, RRAGA, PLIN2, NDUFB6, CTSB, GLRX, oar-mir-10b, ITGB6, U12, IDH1, IGFBP5, SLC11A1, oar-mir-26b, PRKAG3, TUBA4A, SNORD39, INHA, ITM2C, SNORA75, SNORD82, COPS7B, SNORA62, LCK, SNORA73, EYA3
2:40615160:41940976	2	40615160	41940976	1.32582	1147		, U6, GSN, LPAR1, 5S_rRNA, TXN, U2, KLF4, SNORA70, ALDOB, Vault, NFIL3, oar-let-7d, oar-let-7a, UBQLN1, U1, B4GALT1, U4, LPL, 7SK, RNase_MRP, RRAGA, PLIN2, NDUFB6, CTSB, GLRX, oar-mir-10b, ITGB6, U12, IDH1, IGFBP5, SLC11A1, oar-mir-26b, PRKAG3, TUBA4A, SNORD39, INHA, ITM2C, SNORA75, SNORD82, COPS7B, SNORA62, LCK, SNORA73, EYA3
2:43510418:45015658	2	43510418	45015658	1.50524	1147		, U6, GSN, LPAR1, 5S_rRNA, TXN, U2, KLF4, SNORA70, ALDOB, Vault, NFIL3, oar-let-7d, oar-let-7a, UBQLN1, U1, B4GALT1, U4, LPL, 7SK, RNase_MRP, RRAGA, PLIN2, NDUFB6, CTSB, GLRX, oar-mir-10b, ITGB6, U12, IDH1, IGFBP5, SLC11A1, oar-mir-26b, PRKAG3, TUBA4A, SNORD39, INHA, ITM2C, SNORA75, SNORD82, COPS7B, SNORA62, LCK, SNORA73, EYA3
2:45265025:53458580	2	45265025	53458580	8.19355	1147		, U6, GSN, LPAR1, 5S_rRNA, TXN, U2, KLF4, SNORA70, ALDOB, Vault, NFIL3, oar-let-7d, oar-let-7a, UBQLN1, U1, B4GALT1, U4, LPL, 7SK, RNase_MRP, RRAGA, PLIN2, NDUFB6, CTSB, GLRX, oar-mir-10b, ITGB6, U12, IDH1, IGFBP5, SLC11A1, oar-mir-26b, PRKAG3, TUBA4A, SNORD39, INHA, ITM2C, SNORA75, SNORD82, COPS7B, SNORA62, LCK, SNORA73, EYA3
2:53830109:55255002	2	53830109	55255002	1.42489	1147		, U6, GSN, LPAR1, 5S_rRNA, TXN, U2, KLF4, SNORA70, ALDOB, Vault, NFIL3, oar-let-7d, oar-let-7a, UBQLN1, U1, B4GALT1, U4, LPL, 7SK, RNase_MRP, RRAGA, PLIN2, NDUFB6, CTSB, GLRX, oar-mir-10b, ITGB6, U12, IDH1, IGFBP5, SLC11A1, oar-mir-26b, PRKAG3, TUBA4A, SNORD39, INHA, ITM2C, SNORA75, SNORD82, COPS7B, SNORA62, LCK, SNORA73, EYA3
2:6134193:15142638	2	6134193	15142638	9.00845	1147		, U6, GSN, LPAR1, 5S_rRNA, TXN, U2, KLF4, SNORA70, ALDOB, Vault, NFIL3, oar-let-7d, oar-let-7a, UBQLN1, U1, B4GALT1, U4, LPL, 7SK, RNase_MRP, RRAGA, PLIN2, NDUFB6, CTSB, GLRX, oar-mir-10b, ITGB6, U12, IDH1, IGFBP5, SLC11A1, oar-mir-26b, PRKAG3, TUBA4A, SNORD39, INHA, ITM2C, SNORA75, SNORD82, COPS7B, SNORA62, LCK, SNORA73, EYA3
2:70984900:72145675	2	70984900	72145675	1.16077	1147		, U6, GSN, LPAR1, 5S_rRNA, TXN, U2, KLF4, SNORA70, ALDOB, Vault, NFIL3, oar-let-7d, oar-let-7a, UBQLN1, U1, B4GALT1, U4, LPL, 7SK, RNase_MRP, RRAGA, PLIN2, NDUFB6, CTSB, GLRX, oar-mir-10b, ITGB6, U12, IDH1, IGFBP5, SLC11A1, oar-mir-26b, PRKAG3, TUBA4A, SNORD39, INHA, ITM2C, SNORA75, SNORD82, COPS7B, SNORA62, LCK, SNORA73, EYA3
2:74700075:76044554	2	74700075	76044554	1.34448	1147		, U6, GSN, LPAR1, 5S_rRNA, TXN, U2, KLF4, SNORA70, ALDOB, Vault, NFIL3, oar-let-7d, oar-let-7a, UBQLN1, U1, B4GALT1, U4, LPL, 7SK, RNase_MRP, RRAGA, PLIN2, NDUFB6, CTSB, GLRX, oar-mir-10b, ITGB6, U12, IDH1, IGFBP5, SLC11A1, oar-mir-26b, PRKAG3, TUBA4A, SNORD39, INHA, ITM2C, SNORA75, SNORD82, COPS7B, SNORA62, LCK, SNORA73, EYA3
2:84657724:117867801	2	84657724	117867801	33.2101	1147		, U6, GSN, LPAR1, 5S_rRNA, TXN, U2, KLF4, SNORA70, ALDOB, Vault, NFIL3, oar-let-7d, oar-let-7a, UBQLN1, U1, B4GALT1, U4, LPL, 7SK, RNase_MRP, RRAGA, PLIN2, NDUFB6, CTSB, GLRX, oar-mir-10b, ITGB6, U12, IDH1, IGFBP5, SLC11A1, oar-mir-26b, PRKAG3, TUBA4A, SNORD39, INHA, ITM2C, SNORA75, SNORD82, COPS7B, SNORA62, LCK, SNORA73, EYA3
3:100291687:101554845	3	100291687	101554845	1.26316	904		, SNORA70, U6, oar-mir-181a-2, 5S_rRNA, 7SK, RHOB, U4, POMC, RAB10, HADHA, CIB4, SNORA62, RBKS, RPS26, GKN1, U1, SNORA72, Metazoa_SRP, IL1A, U5, FSHR, EPCAM, CALM2, ABCG8, LALBA, SLC25A3, ARL1, CRY1, RTCB, TIMP3, EIF3D, IFT27, SLC2A3, oar-mir-200c, CD4, GAPDH, TNFRSF1A, CD9
3:10690314:11702943	3	10690314	11702943	1.01263	904		, SNORA70, U6, oar-mir-181a-2, 5S_rRNA, 7SK, RHOB, U4, POMC, RAB10, HADHA, CIB4, SNORA62, RBKS, RPS26, GKN1, U1, SNORA72, Metazoa_SRP, IL1A, U5, FSHR, EPCAM, CALM2, ABCG8, LALBA, SLC25A3, ARL1, CRY1, RTCB, TIMP3, EIF3D, IFT27, SLC2A3, oar-mir-200c, CD4, GAPDH, TNFRSF1A, CD9
3:109078250:110247187	3	109078250	110247187	1.16894	904		, SNORA70, U6, oar-mir-181a-2, 5S_rRNA, 7SK, RHOB, U4, POMC, RAB10, HADHA, CIB4, SNORA62, RBKS, RPS26, GKN1, U1, SNORA72, Metazoa_SRP, IL1A, U5, FSHR, EPCAM, CALM2, ABCG8, LALBA, SLC25A3, ARL1, CRY1, RTCB, TIMP3, EIF3D, IFT27, SLC2A3, oar-mir-200c, CD4, GAPDH, TNFRSF1A, CD9
3:136522052:137923041	3	136522052	137923041	1.40099	904		, SNORA70, U6, oar-mir-181a-2, 5S_rRNA, 7SK, RHOB, U4, POMC, RAB10, HADHA, CIB4, SNORA62, RBKS, RPS26, GKN1, U1, SNORA72, Metazoa_SRP, IL1A, U5, FSHR, EPCAM, CALM2, ABCG8, LALBA, SLC25A3, ARL1, CRY1, RTCB, TIMP3, EIF3D, IFT27, SLC2A3, oar-mir-200c, CD4, GAPDH, TNFRSF1A, CD9
3:146077261:147258678	3	146077261	147258678	1.18142	904		, SNORA70, U6, oar-mir-181a-2, 5S_rRNA, 7SK, RHOB, U4, POMC, RAB10, HADHA, CIB4, SNORA62, RBKS, RPS26, GKN1, U1, SNORA72, Metazoa_SRP, IL1A, U5, FSHR, EPCAM, CALM2, ABCG8, LALBA, SLC25A3, ARL1, CRY1, RTCB, TIMP3, EIF3D, IFT27, SLC2A3, oar-mir-200c, CD4, GAPDH, TNFRSF1A, CD9
3:154176421:155485554	3	154176421	155485554	1.30913	904		, SNORA70, U6, oar-mir-181a-2, 5S_rRNA, 7SK, RHOB, U4, POMC, RAB10, HADHA, CIB4, SNORA62, RBKS, RPS26, GKN1, U1, SNORA72, Metazoa_SRP, IL1A, U5, FSHR, EPCAM, CALM2, ABCG8, LALBA, SLC25A3, ARL1, CRY1, RTCB, TIMP3, EIF3D, IFT27, SLC2A3, oar-mir-200c, CD4, GAPDH, TNFRSF1A, CD9
3:164660230:170695071	3	164660230	170695071	6.03484	904		, SNORA70, U6, oar-mir-181a-2, 5S_rRNA, 7SK, RHOB, U4, POMC, RAB10, HADHA, CIB4, SNORA62, RBKS, RPS26, GKN1, U1, SNORA72, Metazoa_SRP, IL1A, U5, FSHR, EPCAM, CALM2, ABCG8, LALBA, SLC25A3, ARL1, CRY1, RTCB, TIMP3, EIF3D, IFT27, SLC2A3, oar-mir-200c, CD4, GAPDH, TNFRSF1A, CD9
3:171111367:177078733	3	171111367	177078733	5.96737	904		, SNORA70, U6, oar-mir-181a-2, 5S_rRNA, 7SK, RHOB, U4, POMC, RAB10, HADHA, CIB4, SNORA62, RBKS, RPS26, GKN1, U1, SNORA72, Metazoa_SRP, IL1A, U5, FSHR, EPCAM, CALM2, ABCG8, LALBA, SLC25A3, ARL1, CRY1, RTCB, TIMP3, EIF3D, IFT27, SLC2A3, oar-mir-200c, CD4, GAPDH, TNFRSF1A, CD9
3:17367896:18674058	3	17367896	18674058	1.30616	904		, SNORA70, U6, oar-mir-181a-2, 5S_rRNA, 7SK, RHOB, U4, POMC, RAB10, HADHA, CIB4, SNORA62, RBKS, RPS26, GKN1, U1, SNORA72, Metazoa_SRP, IL1A, U5, FSHR, EPCAM, CALM2, ABCG8, LALBA, SLC25A3, ARL1, CRY1, RTCB, TIMP3, EIF3D, IFT27, SLC2A3, oar-mir-200c, CD4, GAPDH, TNFRSF1A, CD9
3:179110772:181113434	3	179110772	181113434	2.00266	904		, SNORA70, U6, oar-mir-181a-2, 5S_rRNA, 7SK, RHOB, U4, POMC, RAB10, HADHA, CIB4, SNORA62, RBKS, RPS26, GKN1, U1, SNORA72, Metazoa_SRP, IL1A, U5, FSHR, EPCAM, CALM2, ABCG8, LALBA, SLC25A3, ARL1, CRY1, RTCB, TIMP3, EIF3D, IFT27, SLC2A3, oar-mir-200c, CD4, GAPDH, TNFRSF1A, CD9
3:185397339:187737633	3	185397339	187737633	2.34029	904		, SNORA70, U6, oar-mir-181a-2, 5S_rRNA, 7SK, RHOB, U4, POMC, RAB10, HADHA, CIB4, SNORA62, RBKS, RPS26, GKN1, U1, SNORA72, Metazoa_SRP, IL1A, U5, FSHR, EPCAM, CALM2, ABCG8, LALBA, SLC25A3, ARL1, CRY1, RTCB, TIMP3, EIF3D, IFT27, SLC2A3, oar-mir-200c, CD4, GAPDH, TNFRSF1A, CD9
3:197061285:198304479	3	197061285	198304479	1.24319	904		, SNORA70, U6, oar-mir-181a-2, 5S_rRNA, 7SK, RHOB, U4, POMC, RAB10, HADHA, CIB4, SNORA62, RBKS, RPS26, GKN1, U1, SNORA72, Metazoa_SRP, IL1A, U5, FSHR, EPCAM, CALM2, ABCG8, LALBA, SLC25A3, ARL1, CRY1, RTCB, TIMP3, EIF3D, IFT27, SLC2A3, oar-mir-200c, CD4, GAPDH, TNFRSF1A, CD9
3:202965950:204676652	3	202965950	204676652	1.7107	904		, SNORA70, U6, oar-mir-181a-2, 5S_rRNA, 7SK, RHOB, U4, POMC, RAB10, HADHA, CIB4, SNORA62, RBKS, RPS26, GKN1, U1, SNORA72, Metazoa_SRP, IL1A, U5, FSHR, EPCAM, CALM2, ABCG8, LALBA, SLC25A3, ARL1, CRY1, RTCB, TIMP3, EIF3D, IFT27, SLC2A3, oar-mir-200c, CD4, GAPDH, TNFRSF1A, CD9
3:20321440:29291585	3	20321440	29291585	8.97015	904		, SNORA70, U6, oar-mir-181a-2, 5S_rRNA, 7SK, RHOB, U4, POMC, RAB10, HADHA, CIB4, SNORA62, RBKS, RPS26, GKN1, U1, SNORA72, Metazoa_SRP, IL1A, U5, FSHR, EPCAM, CALM2, ABCG8, LALBA, SLC25A3, ARL1, CRY1, RTCB, TIMP3, EIF3D, IFT27, SLC2A3, oar-mir-200c, CD4, GAPDH, TNFRSF1A, CD9
3:204738621:209079167	3	204738621	209079167	4.34055	904		, SNORA70, U6, oar-mir-181a-2, 5S_rRNA, 7SK, RHOB, U4, POMC, RAB10, HADHA, CIB4, SNORA62, RBKS, RPS26, GKN1, U1, SNORA72, Metazoa_SRP, IL1A, U5, FSHR, EPCAM, CALM2, ABCG8, LALBA, SLC25A3, ARL1, CRY1, RTCB, TIMP3, EIF3D, IFT27, SLC2A3, oar-mir-200c, CD4, GAPDH, TNFRSF1A, CD9
3:29693855:41296376	3	29693855	41296376	11.6025	904		, SNORA70, U6, oar-mir-181a-2, 5S_rRNA, 7SK, RHOB, U4, POMC, RAB10, HADHA, CIB4, SNORA62, RBKS, RPS26, GKN1, U1, SNORA72, Metazoa_SRP, IL1A, U5, FSHR, EPCAM, CALM2, ABCG8, LALBA, SLC25A3, ARL1, CRY1, RTCB, TIMP3, EIF3D, IFT27, SLC2A3, oar-mir-200c, CD4, GAPDH, TNFRSF1A, CD9
3:31457:1903574	3	31457	1903574	1.87212	904		, SNORA70, U6, oar-mir-181a-2, 5S_rRNA, 7SK, RHOB, U4, POMC, RAB10, HADHA, CIB4, SNORA62, RBKS, RPS26, GKN1, U1, SNORA72, Metazoa_SRP, IL1A, U5, FSHR, EPCAM, CALM2, ABCG8, LALBA, SLC25A3, ARL1, CRY1, RTCB, TIMP3, EIF3D, IFT27, SLC2A3, oar-mir-200c, CD4, GAPDH, TNFRSF1A, CD9
3:46078890:47716349	3	46078890	47716349	1.63746	904		, SNORA70, U6, oar-mir-181a-2, 5S_rRNA, 7SK, RHOB, U4, POMC, RAB10, HADHA, CIB4, SNORA62, RBKS, RPS26, GKN1, U1, SNORA72, Metazoa_SRP, IL1A, U5, FSHR, EPCAM, CALM2, ABCG8, LALBA, SLC25A3, ARL1, CRY1, RTCB, TIMP3, EIF3D, IFT27, SLC2A3, oar-mir-200c, CD4, GAPDH, TNFRSF1A, CD9
3:47817469:54514243	3	47817469	54514243	6.69677	904		, SNORA70, U6, oar-mir-181a-2, 5S_rRNA, 7SK, RHOB, U4, POMC, RAB10, HADHA, CIB4, SNORA62, RBKS, RPS26, GKN1, U1, SNORA72, Metazoa_SRP, IL1A, U5, FSHR, EPCAM, CALM2, ABCG8, LALBA, SLC25A3, ARL1, CRY1, RTCB, TIMP3, EIF3D, IFT27, SLC2A3, oar-mir-200c, CD4, GAPDH, TNFRSF1A, CD9
3:60135763:61255873	3	60135763	61255873	1.12011	904		, SNORA70, U6, oar-mir-181a-2, 5S_rRNA, 7SK, RHOB, U4, POMC, RAB10, HADHA, CIB4, SNORA62, RBKS, RPS26, GKN1, U1, SNORA72, Metazoa_SRP, IL1A, U5, FSHR, EPCAM, CALM2, ABCG8, LALBA, SLC25A3, ARL1, CRY1, RTCB, TIMP3, EIF3D, IFT27, SLC2A3, oar-mir-200c, CD4, GAPDH, TNFRSF1A, CD9
3:6405471:7719320	3	6405471	7719320	1.31385	904		, SNORA70, U6, oar-mir-181a-2, 5S_rRNA, 7SK, RHOB, U4, POMC, RAB10, HADHA, CIB4, SNORA62, RBKS, RPS26, GKN1, U1, SNORA72, Metazoa_SRP, IL1A, U5, FSHR, EPCAM, CALM2, ABCG8, LALBA, SLC25A3, ARL1, CRY1, RTCB, TIMP3, EIF3D, IFT27, SLC2A3, oar-mir-200c, CD4, GAPDH, TNFRSF1A, CD9
3:71711912:73436500	3	71711912	73436500	1.72459	904		, SNORA70, U6, oar-mir-181a-2, 5S_rRNA, 7SK, RHOB, U4, POMC, RAB10, HADHA, CIB4, SNORA62, RBKS, RPS26, GKN1, U1, SNORA72, Metazoa_SRP, IL1A, U5, FSHR, EPCAM, CALM2, ABCG8, LALBA, SLC25A3, ARL1, CRY1, RTCB, TIMP3, EIF3D, IFT27, SLC2A3, oar-mir-200c, CD4, GAPDH, TNFRSF1A, CD9
3:73995077:77759244	3	73995077	77759244	3.76417	904		, SNORA70, U6, oar-mir-181a-2, 5S_rRNA, 7SK, RHOB, U4, POMC, RAB10, HADHA, CIB4, SNORA62, RBKS, RPS26, GKN1, U1, SNORA72, Metazoa_SRP, IL1A, U5, FSHR, EPCAM, CALM2, ABCG8, LALBA, SLC25A3, ARL1, CRY1, RTCB, TIMP3, EIF3D, IFT27, SLC2A3, oar-mir-200c, CD4, GAPDH, TNFRSF1A, CD9
3:80035773:85548986	3	80035773	85548986	5.51321	904		, SNORA70, U6, oar-mir-181a-2, 5S_rRNA, 7SK, RHOB, U4, POMC, RAB10, HADHA, CIB4, SNORA62, RBKS, RPS26, GKN1, U1, SNORA72, Metazoa_SRP, IL1A, U5, FSHR, EPCAM, CALM2, ABCG8, LALBA, SLC25A3, ARL1, CRY1, RTCB, TIMP3, EIF3D, IFT27, SLC2A3, oar-mir-200c, CD4, GAPDH, TNFRSF1A, CD9
4:105715849:107004249	4	105715849	107004249	1.2884	571		, U6, 7SK, PEG10, PON2, SNORA70, 5S_rRNA, SNORA62, ARL4A, SNORD31, CTTNBP2, CFTR, ASZ1, WNT2, ST7, U4, LSM5, GHRHR, AQP1, PRR15, oar-mir-148a, NPVF, SRI, IGFBP3, IGFBP1, GCK, INHBA, U7, U3, ARF5, CHCHD3, Y_RNA
4:11272641:13676954	4	11272641	13676954	2.40431	571		, U6, 7SK, PEG10, PON2, SNORA70, 5S_rRNA, SNORA62, ARL4A, SNORD31, CTTNBP2, CFTR, ASZ1, WNT2, ST7, U4, LSM5, GHRHR, AQP1, PRR15, oar-mir-148a, NPVF, SRI, IGFBP3, IGFBP1, GCK, INHBA, U7, U3, ARF5, CHCHD3, Y_RNA
4:15820359:27182876	4	15820359	27182876	11.3625	571		, U6, 7SK, PEG10, PON2, SNORA70, 5S_rRNA, SNORA62, ARL4A, SNORD31, CTTNBP2, CFTR, ASZ1, WNT2, ST7, U4, LSM5, GHRHR, AQP1, PRR15, oar-mir-148a, NPVF, SRI, IGFBP3, IGFBP1, GCK, INHBA, U7, U3, ARF5, CHCHD3, Y_RNA
4:42859924:44353770	4	42859924	44353770	1.49385	571		, U6, 7SK, PEG10, PON2, SNORA70, 5S_rRNA, SNORA62, ARL4A, SNORD31, CTTNBP2, CFTR, ASZ1, WNT2, ST7, U4, LSM5, GHRHR, AQP1, PRR15, oar-mir-148a, NPVF, SRI, IGFBP3, IGFBP1, GCK, INHBA, U7, U3, ARF5, CHCHD3, Y_RNA
4:45859629:46864537	4	45859629	46864537	1.00491	571		, U6, 7SK, PEG10, PON2, SNORA70, 5S_rRNA, SNORA62, ARL4A, SNORD31, CTTNBP2, CFTR, ASZ1, WNT2, ST7, U4, LSM5, GHRHR, AQP1, PRR15, oar-mir-148a, NPVF, SRI, IGFBP3, IGFBP1, GCK, INHBA, U7, U3, ARF5, CHCHD3, Y_RNA
4:49915071:51107546	4	49915071	51107546	1.19247	571		, U6, 7SK, PEG10, PON2, SNORA70, 5S_rRNA, SNORA62, ARL4A, SNORD31, CTTNBP2, CFTR, ASZ1, WNT2, ST7, U4, LSM5, GHRHR, AQP1, PRR15, oar-mir-148a, NPVF, SRI, IGFBP3, IGFBP1, GCK, INHBA, U7, U3, ARF5, CHCHD3, Y_RNA
4:52437352:53988960	4	52437352	53988960	1.55161	571		, U6, 7SK, PEG10, PON2, SNORA70, 5S_rRNA, SNORA62, ARL4A, SNORD31, CTTNBP2, CFTR, ASZ1, WNT2, ST7, U4, LSM5, GHRHR, AQP1, PRR15, oar-mir-148a, NPVF, SRI, IGFBP3, IGFBP1, GCK, INHBA, U7, U3, ARF5, CHCHD3, Y_RNA
4:56089343:61746668	4	56089343	61746668	5.65733	571		, U6, 7SK, PEG10, PON2, SNORA70, 5S_rRNA, SNORA62, ARL4A, SNORD31, CTTNBP2, CFTR, ASZ1, WNT2, ST7, U4, LSM5, GHRHR, AQP1, PRR15, oar-mir-148a, NPVF, SRI, IGFBP3, IGFBP1, GCK, INHBA, U7, U3, ARF5, CHCHD3, Y_RNA
4:62927453:104921752	4	62927453	104921752	41.9943	571		, U6, 7SK, PEG10, PON2, SNORA70, 5S_rRNA, SNORA62, ARL4A, SNORD31, CTTNBP2, CFTR, ASZ1, WNT2, ST7, U4, LSM5, GHRHR, AQP1, PRR15, oar-mir-148a, NPVF, SRI, IGFBP3, IGFBP1, GCK, INHBA, U7, U3, ARF5, CHCHD3, Y_RNA
4:959000:2419869	4	959000	2419869	1.46087	571		, U6, 7SK, PEG10, PON2, SNORA70, 5S_rRNA, SNORA62, ARL4A, SNORD31, CTTNBP2, CFTR, ASZ1, WNT2, ST7, U4, LSM5, GHRHR, AQP1, PRR15, oar-mir-148a, NPVF, SRI, IGFBP3, IGFBP1, GCK, INHBA, U7, U3, ARF5, CHCHD3, Y_RNA
5:100892828:102072558	5	100892828	102072558	1.17973	506		, RAB8A, CYP4F21, ZNF333, PRKACA, oar-mir-23a, oar-mir-27a, Y_RNA, EIF3G, DNMT1, U6, ICAM1, 5S_rRNA, U2, RACK1, SNORD96, ZNF496, TXNDC15, FBXL21P, Vault, EGR1, SNORD63, SNORA74, PURA, SLC35A4, CD14, U4, NR3C1, SCGB3A2, ADRB2, oar-mir-143, SLC26A2, U1, MYOZ3, SPARC, ATOX1, IL12B
5:12263781:13444549	5	12263781	13444549	1.18077	506		, RAB8A, CYP4F21, ZNF333, PRKACA, oar-mir-23a, oar-mir-27a, Y_RNA, EIF3G, DNMT1, U6, ICAM1, 5S_rRNA, U2, RACK1, SNORD96, ZNF496, TXNDC15, FBXL21P, Vault, EGR1, SNORD63, SNORA74, PURA, SLC35A4, CD14, U4, NR3C1, SCGB3A2, ADRB2, oar-mir-143, SLC26A2, U1, MYOZ3, SPARC, ATOX1, IL12B
5:25319096:26646807	5	25319096	26646807	1.32771	506		, RAB8A, CYP4F21, ZNF333, PRKACA, oar-mir-23a, oar-mir-27a, Y_RNA, EIF3G, DNMT1, U6, ICAM1, 5S_rRNA, U2, RACK1, SNORD96, ZNF496, TXNDC15, FBXL21P, Vault, EGR1, SNORD63, SNORA74, PURA, SLC35A4, CD14, U4, NR3C1, SCGB3A2, ADRB2, oar-mir-143, SLC26A2, U1, MYOZ3, SPARC, ATOX1, IL12B
5:37738161:38865621	5	37738161	38865621	1.12746	506		, RAB8A, CYP4F21, ZNF333, PRKACA, oar-mir-23a, oar-mir-27a, Y_RNA, EIF3G, DNMT1, U6, ICAM1, 5S_rRNA, U2, RACK1, SNORD96, ZNF496, TXNDC15, FBXL21P, Vault, EGR1, SNORD63, SNORA74, PURA, SLC35A4, CD14, U4, NR3C1, SCGB3A2, ADRB2, oar-mir-143, SLC26A2, U1, MYOZ3, SPARC, ATOX1, IL12B
5:43530511:44944098	5	43530511	44944098	1.41359	506		, RAB8A, CYP4F21, ZNF333, PRKACA, oar-mir-23a, oar-mir-27a, Y_RNA, EIF3G, DNMT1, U6, ICAM1, 5S_rRNA, U2, RACK1, SNORD96, ZNF496, TXNDC15, FBXL21P, Vault, EGR1, SNORD63, SNORA74, PURA, SLC35A4, CD14, U4, NR3C1, SCGB3A2, ADRB2, oar-mir-143, SLC26A2, U1, MYOZ3, SPARC, ATOX1, IL12B
5:45494254:49773131	5	45494254	49773131	4.27888	506		, RAB8A, CYP4F21, ZNF333, PRKACA, oar-mir-23a, oar-mir-27a, Y_RNA, EIF3G, DNMT1, U6, ICAM1, 5S_rRNA, U2, RACK1, SNORD96, ZNF496, TXNDC15, FBXL21P, Vault, EGR1, SNORD63, SNORA74, PURA, SLC35A4, CD14, U4, NR3C1, SCGB3A2, ADRB2, oar-mir-143, SLC26A2, U1, MYOZ3, SPARC, ATOX1, IL12B
5:50175787:52716449	5	50175787	52716449	2.54066	506		, RAB8A, CYP4F21, ZNF333, PRKACA, oar-mir-23a, oar-mir-27a, Y_RNA, EIF3G, DNMT1, U6, ICAM1, 5S_rRNA, U2, RACK1, SNORD96, ZNF496, TXNDC15, FBXL21P, Vault, EGR1, SNORD63, SNORA74, PURA, SLC35A4, CD14, U4, NR3C1, SCGB3A2, ADRB2, oar-mir-143, SLC26A2, U1, MYOZ3, SPARC, ATOX1, IL12B
5:53756887:62095821	5	53756887	62095821	8.33893	506		, RAB8A, CYP4F21, ZNF333, PRKACA, oar-mir-23a, oar-mir-27a, Y_RNA, EIF3G, DNMT1, U6, ICAM1, 5S_rRNA, U2, RACK1, SNORD96, ZNF496, TXNDC15, FBXL21P, Vault, EGR1, SNORD63, SNORA74, PURA, SLC35A4, CD14, U4, NR3C1, SCGB3A2, ADRB2, oar-mir-143, SLC26A2, U1, MYOZ3, SPARC, ATOX1, IL12B
5:64012677:65459444	5	64012677	65459444	1.44677	506		, RAB8A, CYP4F21, ZNF333, PRKACA, oar-mir-23a, oar-mir-27a, Y_RNA, EIF3G, DNMT1, U6, ICAM1, 5S_rRNA, U2, RACK1, SNORD96, ZNF496, TXNDC15, FBXL21P, Vault, EGR1, SNORD63, SNORA74, PURA, SLC35A4, CD14, U4, NR3C1, SCGB3A2, ADRB2, oar-mir-143, SLC26A2, U1, MYOZ3, SPARC, ATOX1, IL12B
5:65951714:68690904	5	65951714	68690904	2.73919	506		, RAB8A, CYP4F21, ZNF333, PRKACA, oar-mir-23a, oar-mir-27a, Y_RNA, EIF3G, DNMT1, U6, ICAM1, 5S_rRNA, U2, RACK1, SNORD96, ZNF496, TXNDC15, FBXL21P, Vault, EGR1, SNORD63, SNORA74, PURA, SLC35A4, CD14, U4, NR3C1, SCGB3A2, ADRB2, oar-mir-143, SLC26A2, U1, MYOZ3, SPARC, ATOX1, IL12B
5:6711638:10295177	5	6711638	10295177	3.58354	506		, RAB8A, CYP4F21, ZNF333, PRKACA, oar-mir-23a, oar-mir-27a, Y_RNA, EIF3G, DNMT1, U6, ICAM1, 5S_rRNA, U2, RACK1, SNORD96, ZNF496, TXNDC15, FBXL21P, Vault, EGR1, SNORD63, SNORA74, PURA, SLC35A4, CD14, U4, NR3C1, SCGB3A2, ADRB2, oar-mir-143, SLC26A2, U1, MYOZ3, SPARC, ATOX1, IL12B
5:70893895:72121762	5	70893895	72121762	1.22787	506		, RAB8A, CYP4F21, ZNF333, PRKACA, oar-mir-23a, oar-mir-27a, Y_RNA, EIF3G, DNMT1, U6, ICAM1, 5S_rRNA, U2, RACK1, SNORD96, ZNF496, TXNDC15, FBXL21P, Vault, EGR1, SNORD63, SNORA74, PURA, SLC35A4, CD14, U4, NR3C1, SCGB3A2, ADRB2, oar-mir-143, SLC26A2, U1, MYOZ3, SPARC, ATOX1, IL12B
5:77551959:80696209	5	77551959	80696209	3.14425	506		, RAB8A, CYP4F21, ZNF333, PRKACA, oar-mir-23a, oar-mir-27a, Y_RNA, EIF3G, DNMT1, U6, ICAM1, 5S_rRNA, U2, RACK1, SNORD96, ZNF496, TXNDC15, FBXL21P, Vault, EGR1, SNORD63, SNORA74, PURA, SLC35A4, CD14, U4, NR3C1, SCGB3A2, ADRB2, oar-mir-143, SLC26A2, U1, MYOZ3, SPARC, ATOX1, IL12B
5:88184822:89680837	5	88184822	89680837	1.49602	506		, RAB8A, CYP4F21, ZNF333, PRKACA, oar-mir-23a, oar-mir-27a, Y_RNA, EIF3G, DNMT1, U6, ICAM1, 5S_rRNA, U2, RACK1, SNORD96, ZNF496, TXNDC15, FBXL21P, Vault, EGR1, SNORD63, SNORA74, PURA, SLC35A4, CD14, U4, NR3C1, SCGB3A2, ADRB2, oar-mir-143, SLC26A2, U1, MYOZ3, SPARC, ATOX1, IL12B
6:11574864:12906359	6	11574864	12906359	1.3315	251		, U6, BMPR1B, ABCG2, SPP1, 5S_rRNA, SNORA70, TLR10, TLR1, TLR6, LIAS, RHOH, KDR, CLOCK, CSN1S1, CSN2, CSN1S2, CSN3, SNORD42, ALB, 7SK, CXCL8, CXCL1, RCHY1, U1, U4, SCD5
6:25542555:38746004	6	25542555	38746004	13.2034	251		, U6, BMPR1B, ABCG2, SPP1, 5S_rRNA, SNORA70, TLR10, TLR1, TLR6, LIAS, RHOH, KDR, CLOCK, CSN1S1, CSN2, CSN1S2, CSN3, SNORD42, ALB, 7SK, CXCL8, CXCL1, RCHY1, U1, U4, SCD5
6:42765277:43875813	6	42765277	43875813	1.11054	251		, U6, BMPR1B, ABCG2, SPP1, 5S_rRNA, SNORA70, TLR10, TLR1, TLR6, LIAS, RHOH, KDR, CLOCK, CSN1S1, CSN2, CSN1S2, CSN3, SNORD42, ALB, 7SK, CXCL8, CXCL1, RCHY1, U1, U4, SCD5
6:44459843:46493107	6	44459843	46493107	2.03326	251		, U6, BMPR1B, ABCG2, SPP1, 5S_rRNA, SNORA70, TLR10, TLR1, TLR6, LIAS, RHOH, KDR, CLOCK, CSN1S1, CSN2, CSN1S2, CSN3, SNORD42, ALB, 7SK, CXCL8, CXCL1, RCHY1, U1, U4, SCD5
6:46602091:59693191	6	46602091	59693191	13.0911	251		, U6, BMPR1B, ABCG2, SPP1, 5S_rRNA, SNORA70, TLR10, TLR1, TLR6, LIAS, RHOH, KDR, CLOCK, CSN1S1, CSN2, CSN1S2, CSN3, SNORD42, ALB, 7SK, CXCL8, CXCL1, RCHY1, U1, U4, SCD5
6:70478681:71495476	6	70478681	71495476	1.01679	251		, U6, BMPR1B, ABCG2, SPP1, 5S_rRNA, SNORA70, TLR10, TLR1, TLR6, LIAS, RHOH, KDR, CLOCK, CSN1S1, CSN2, CSN1S2, CSN3, SNORD42, ALB, 7SK, CXCL8, CXCL1, RCHY1, U1, U4, SCD5
6:75819375:77161747	6	75819375	77161747	1.34237	251		, U6, BMPR1B, ABCG2, SPP1, 5S_rRNA, SNORA70, TLR10, TLR1, TLR6, LIAS, RHOH, KDR, CLOCK, CSN1S1, CSN2, CSN1S2, CSN3, SNORD42, ALB, 7SK, CXCL8, CXCL1, RCHY1, U1, U4, SCD5
6:84445434:86903129	6	84445434	86903129	2.4577	251		, U6, BMPR1B, ABCG2, SPP1, 5S_rRNA, SNORA70, TLR10, TLR1, TLR6, LIAS, RHOH, KDR, CLOCK, CSN1S1, CSN2, CSN1S2, CSN3, SNORD42, ALB, 7SK, CXCL8, CXCL1, RCHY1, U1, U4, SCD5
6:87360396:90443469	6	87360396	90443469	3.08307	251		, U6, BMPR1B, ABCG2, SPP1, 5S_rRNA, SNORA70, TLR10, TLR1, TLR6, LIAS, RHOH, KDR, CLOCK, CSN1S1, CSN2, CSN1S2, CSN3, SNORD42, ALB, 7SK, CXCL8, CXCL1, RCHY1, U1, U4, SCD5
6:96380982:97405751	6	96380982	97405751	1.02477	251		, U6, BMPR1B, ABCG2, SPP1, 5S_rRNA, SNORA70, TLR10, TLR1, TLR6, LIAS, RHOH, KDR, CLOCK, CSN1S1, CSN2, CSN1S2, CSN3, SNORD42, ALB, 7SK, CXCL8, CXCL1, RCHY1, U1, U4, SCD5
7:126066:5882330	7	126066	5882330	5.75626	852		, SFXN1, SNORA72, SNORA62, U4, U6, U5, Y_RNA, SNORD18, SNORD16, SNORA70, CLN6, 5S_rRNA, 7SK, HEXA, SNORD22, IL25, SNORA66, U1, MMP14, SLC39A2, RNaseP_nuc, RHOV, CAPN3, Metazoa_SRP, ARF6, PYGL, TPM1, ANXA2, U7, CYP19, TRPM7, FGF7, SLC24A5, DUOX2, BMP4, TSHR, GSTA1
7:29376620:68859270	7	29376620	68859270	39.4826	852		, SFXN1, SNORA72, SNORA62, U4, U6, U5, Y_RNA, SNORD18, SNORD16, SNORA70, CLN6, 5S_rRNA, 7SK, HEXA, SNORD22, IL25, SNORA66, U1, MMP14, SLC39A2, RNaseP_nuc, RHOV, CAPN3, Metazoa_SRP, ARF6, PYGL, TPM1, ANXA2, U7, CYP19, TRPM7, FGF7, SLC24A5, DUOX2, BMP4, TSHR, GSTA1
7:87082851:94980986	7	87082851	94980986	7.89813	852		, SFXN1, SNORA72, SNORA62, U4, U6, U5, Y_RNA, SNORD18, SNORD16, SNORA70, CLN6, 5S_rRNA, 7SK, HEXA, SNORD22, IL25, SNORA66, U1, MMP14, SLC39A2, RNaseP_nuc, RHOV, CAPN3, Metazoa_SRP, ARF6, PYGL, TPM1, ANXA2, U7, CYP19, TRPM7, FGF7, SLC24A5, DUOX2, BMP4, TSHR, GSTA1
7:8745177:29122196	7	8745177	29122196	20.377	852		, SFXN1, SNORA72, SNORA62, U4, U6, U5, Y_RNA, SNORD18, SNORD16, SNORA70, CLN6, 5S_rRNA, 7SK, HEXA, SNORD22, IL25, SNORA66, U1, MMP14, SLC39A2, RNaseP_nuc, RHOV, CAPN3, Metazoa_SRP, ARF6, PYGL, TPM1, ANXA2, U7, CYP19, TRPM7, FGF7, SLC24A5, DUOX2, BMP4, TSHR, GSTA1
7:96293442:98911318	7	96293442	98911318	2.61788	852		, SFXN1, SNORA72, SNORA62, U4, U6, U5, Y_RNA, SNORD18, SNORD16, SNORA70, CLN6, 5S_rRNA, 7SK, HEXA, SNORD22, IL25, SNORA66, U1, MMP14, SLC39A2, RNaseP_nuc, RHOV, CAPN3, Metazoa_SRP, ARF6, PYGL, TPM1, ANXA2, U7, CYP19, TRPM7, FGF7, SLC24A5, DUOX2, BMP4, TSHR, GSTA1
8:13943449:25514989	8	13943449	25514989	11.5715	392		, SLC17A5, U6, 7SK, 5S_rRNA, U2, ME1, ASF1A, COQ3, U5, AKIRIN2, SNORA70, CGA, SNORD22, LATS1, VIP
8:2459:13476317	8	2459	13476317	13.4739	392		, SLC17A5, U6, 7SK, 5S_rRNA, U2, ME1, ASF1A, COQ3, U5, AKIRIN2, SNORA70, CGA, SNORD22, LATS1, VIP
8:31264584:32459191	8	31264584	32459191	1.19461	392		, SLC17A5, U6, 7SK, 5S_rRNA, U2, ME1, ASF1A, COQ3, U5, AKIRIN2, SNORA70, CGA, SNORD22, LATS1, VIP
8:36534038:54808780	8	36534038	54808780	18.2747	392		, SLC17A5, U6, 7SK, 5S_rRNA, U2, ME1, ASF1A, COQ3, U5, AKIRIN2, SNORA70, CGA, SNORD22, LATS1, VIP
8:68217502:82845390	8	68217502	82845390	14.6279	392		, SLC17A5, U6, 7SK, 5S_rRNA, U2, ME1, ASF1A, COQ3, U5, AKIRIN2, SNORA70, CGA, SNORD22, LATS1, VIP
8:83633676:86710248	8	83633676	86710248	3.07657	392		, SLC17A5, U6, 7SK, 5S_rRNA, U2, ME1, ASF1A, COQ3, U5, AKIRIN2, SNORA70, CGA, SNORD22, LATS1, VIP
8:87137934:88789943	8	87137934	88789943	1.65201	392		, SLC17A5, U6, 7SK, 5S_rRNA, U2, ME1, ASF1A, COQ3, U5, AKIRIN2, SNORA70, CGA, SNORD22, LATS1, VIP
9:115543:2971036	9	115543	2971036	2.85549	315		, 7SK, 5S_rRNA, OOEP, U6, oar-mir-30a, DGAT1, oar-mir-30d, oar-mir-30b, SQLE, U2, LYN, U1, SDR16C5, SNORA70, TTPA, TRHR, SNORD22, YWHAZ, KCNS2
9:17445816:18485140	9	17445816	18485140	1.03932	315		, 7SK, 5S_rRNA, OOEP, U6, oar-mir-30a, DGAT1, oar-mir-30d, oar-mir-30b, SQLE, U2, LYN, U1, SDR16C5, SNORA70, TTPA, TRHR, SNORD22, YWHAZ, KCNS2
9:19320509:20501390	9	19320509	20501390	1.18088	315		, 7SK, 5S_rRNA, OOEP, U6, oar-mir-30a, DGAT1, oar-mir-30d, oar-mir-30b, SQLE, U2, LYN, U1, SDR16C5, SNORA70, TTPA, TRHR, SNORD22, YWHAZ, KCNS2
9:26904069:29235012	9	26904069	29235012	2.33094	315		, 7SK, 5S_rRNA, OOEP, U6, oar-mir-30a, DGAT1, oar-mir-30d, oar-mir-30b, SQLE, U2, LYN, U1, SDR16C5, SNORA70, TTPA, TRHR, SNORD22, YWHAZ, KCNS2
9:33569085:35709024	9	33569085	35709024	2.13994	315		, 7SK, 5S_rRNA, OOEP, U6, oar-mir-30a, DGAT1, oar-mir-30d, oar-mir-30b, SQLE, U2, LYN, U1, SDR16C5, SNORA70, TTPA, TRHR, SNORD22, YWHAZ, KCNS2
9:35852886:38221892	9	35852886	38221892	2.36901	315		, 7SK, 5S_rRNA, OOEP, U6, oar-mir-30a, DGAT1, oar-mir-30d, oar-mir-30b, SQLE, U2, LYN, U1, SDR16C5, SNORA70, TTPA, TRHR, SNORD22, YWHAZ, KCNS2
9:38488053:41042935	9	38488053	41042935	2.55488	315		, 7SK, 5S_rRNA, OOEP, U6, oar-mir-30a, DGAT1, oar-mir-30d, oar-mir-30b, SQLE, U2, LYN, U1, SDR16C5, SNORA70, TTPA, TRHR, SNORD22, YWHAZ, KCNS2
9:41343704:42661858	9	41343704	42661858	1.31815	315		, 7SK, 5S_rRNA, OOEP, U6, oar-mir-30a, DGAT1, oar-mir-30d, oar-mir-30b, SQLE, U2, LYN, U1, SDR16C5, SNORA70, TTPA, TRHR, SNORD22, YWHAZ, KCNS2
9:44551958:46102813	9	44551958	46102813	1.55086	315		, 7SK, 5S_rRNA, OOEP, U6, oar-mir-30a, DGAT1, oar-mir-30d, oar-mir-30b, SQLE, U2, LYN, U1, SDR16C5, SNORA70, TTPA, TRHR, SNORD22, YWHAZ, KCNS2
9:62920249:64033659	9	62920249	64033659	1.11341	315		, 7SK, 5S_rRNA, OOEP, U6, oar-mir-30a, DGAT1, oar-mir-30d, oar-mir-30b, SQLE, U2, LYN, U1, SDR16C5, SNORA70, TTPA, TRHR, SNORD22, YWHAZ, KCNS2
9:67789804:78601117	9	67789804	78601117	10.8113	315		, 7SK, 5S_rRNA, OOEP, U6, oar-mir-30a, DGAT1, oar-mir-30d, oar-mir-30b, SQLE, U2, LYN, U1, SDR16C5, SNORA70, TTPA, TRHR, SNORD22, YWHAZ, KCNS2
9:8036231:14960123	9	8036231	14960123	6.92389	315		, 7SK, 5S_rRNA, OOEP, U6, oar-mir-30a, DGAT1, oar-mir-30d, oar-mir-30b, SQLE, U2, LYN, U1, SDR16C5, SNORA70, TTPA, TRHR, SNORD22, YWHAZ, KCNS2
9:90230224:92366463	9	90230224	92366463	2.13624	315		, 7SK, 5S_rRNA, OOEP, U6, oar-mir-30a, DGAT1, oar-mir-30d, oar-mir-30b, SQLE, U2, LYN, U1, SDR16C5, SNORA70, TTPA, TRHR, SNORD22, YWHAZ, KCNS2
