# Supplementary material for: Comparative Detection of Selection Signatures in Indigenous and Crossbred Turkish Sheep Breeds
Source: Research Square preprint supplement (doi:10.21203/rs.3.rs-7364156/v1), 2025-09-09
Supplement: Supplementary file 9 [file f2c8c3e0e60d66bfa938f43a.xlsx]

## Sheet: Sheet1
	Table S8. Signatures of selection detected by iHS in Hasmer
Region	Chr	Start	Stop	Size_Mb	No_of_genes	Peak_gene	Genes
10:1500000:2e+06	10	1500000	2000000	0.5	8	U6	U6,
10:4500000:5500000	10	4500000	5500000	1	8	U6	U6,
14:4500000:5e+06	14	4500000	5000000	0.5	3
16:1.3e+08:13500000	16	130000000	13500000	-116.5	1		NA
16:1.7e+08:17500000	16	170000000	17500000	-152.5	1		NA
3:75500000:7.6e+08	3	75500000	760000000	684.5	1736	FSHR	FSHR, U6, , EPCAM, CALM2, ABCG8, U4, SNORA70, 5S_rRNA, QPCT, U7, CNGA3, CIAO1, ATXN7L3B, MYF6, C3H12orf29, SNORD22, DCN, BTG1, NDUFA12, CBX5, HOXC6, ATP5MC2, TARBP2, IGFBP6, KRT2.11, AQP5, LALBA, IRAK4, SNORA62, YEATS4, LYZ, IL22, IFNG, U1, AVPR1A, oar-mir-26a, CDK4, MIP, TIMELESS, IL23A, CDK2, MMP19, SLC25A3, ARL1, CRY1, RTCB, TIMP3, MB, EIF3D, IFT27, BCAT1, 7SK, RPS3A, RNase_MRP, PDE6H, SLC2A3,…
3:8.8e+08:88500000	3	880000000	88500000	-791.5	1736	FSHR	FSHR, U6, , EPCAM, CALM2, ABCG8, U4, SNORA70, 5S_rRNA, QPCT, U7, CNGA3, CIAO1, ATXN7L3B, MYF6, C3H12orf29, SNORD22, DCN, BTG1, NDUFA12, CBX5, HOXC6, ATP5MC2, TARBP2, IGFBP6, KRT2.11, AQP5, LALBA, IRAK4, SNORA62, YEATS4, LYZ, IL22, IFNG, U1, AVPR1A, oar-mir-26a, CDK4, MIP, TIMELESS, IL23A, CDK2, MMP19, SLC25A3, ARL1, CRY1, RTCB, TIMP3, MB, EIF3D, IFT27, BCAT1, 7SK, RPS3A, RNase_MRP, PDE6H, SLC2A3,…
5:6.6e+08:66500000	5	660000000	66500000	-593.5	144		, U6, 5S_rRNA, U2, MEF2C, CAST, U3, U1, SNORA70
5:6.9e+08:7e+07	5	690000000	70000000	-620	144		, U6, 5S_rRNA, U2, MEF2C, CAST, U3, U1, SNORA70
5:7.5e+08:7.6e+08	5	750000000	760000000	10	144		, U6, 5S_rRNA, U2, MEF2C, CAST, U3, U1, SNORA70
5:76500000:7.8e+08	5	76500000	780000000	703.5	144		, U6, 5S_rRNA, U2, MEF2C, CAST, U3, U1, SNORA70
6:1.02e+10:102500000	6	10200000000	102500000	-10097.5	566		, U6, 5S_rRNA, SNORA70, TLR10, TLR1, TLR6, LIAS, RHOH, KDR, CLOCK, U4, IGFBP7, GNRHR, UGT2B7, CSN1S1, CSN2, CSN1S2, CSN3, SNORD42, ALB, 7SK, CXCL8, CXCL1, RCHY1, U1, CXCL10, SCD5, NUDT9, RAB28, BLOC1S4, HTT
6:37500000:3.8e+08	6	37500000	380000000	342.5	566		, U6, 5S_rRNA, SNORA70, TLR10, TLR1, TLR6, LIAS, RHOH, KDR, CLOCK, U4, IGFBP7, GNRHR, UGT2B7, CSN1S1, CSN2, CSN1S2, CSN3, SNORD42, ALB, 7SK, CXCL8, CXCL1, RCHY1, U1, CXCL10, SCD5, NUDT9, RAB28, BLOC1S4, HTT
